# Supplementary material for: Deimination Protein Profiles in Alligator mississippiensis Reveal Plasma and Extracellular Vesicle-Specific Signatures Relating to Immunity, Metabolic Function, and Gene Regulation
Source: Front Immunol. 2020 Apr 28;11:651. doi: 10.3389/fimmu.2020.00651 (PMC7198796; doi:10.3389/fimmu.2020.00651)
Supplement: Supplementary Table 2 — F95-enriched proteins from plasma-EVs of American alligator (Alligator mississippiensis) plasma. Full details of protein hits are reported. [file Table_2.XLSX]

## Sheet: F003813
F95 ENRICHED PROTEINS IN ALLIGATOR PLASMA-EVs
Peak list format	Mascot generic
Search type	MIS
Mascot version	2.6.2
Database	1::cRAP 2::CCP_Alligator_mississippiensis
Total sequences	32097
Total residues	16516917
Sequences after taxonomy filter	32097
Number of queries	8872
Protein hits	--------------------------------------------------------
prot_hit_num	prot_acc	prot_desc	prot_score	prot_mass	prot_matches	prot_matches_sig	prot_sequences	prot_sequences_sig	prot_cover	prot_len	prot_seq	pep_query	pep_index	pep_rank	pep_isbold	pep_isunique	pep_exp_mz	pep_exp_mr	pep_exp_z	pep_calc_mr	pep_delta	pep_miss	pep_score	pep_expect	pep_res_before	pep_seq	pep_res_after
1	2::tr|A0A151NL74|A0A151NL74_ALLMI	Uncharacterized protein OS=Alligator mississippiensis OX=8496 GN=Y1Q_0015779 PE=4 SV=1	3704	187765	86	86	69	69	46	1655	MEGSICYLAAVLLFCFPAVVHSQLYSLITPNVLRVESEEKVVVEANGLNAATEVTITVHDFPFKRQVLYLIKANLNPDEGMLTTATIKISSNQVKKDSRDNQYVLIQAKIKDVTLEKVVLLSFHSGYIFVQTDKTIYTPGSTVLCRIFAMGHKMEPLFKTVIVEFETPEGIIVKQSPVFSPMKTGIYSLNYNLPEIVNLGTWKVVAKFQDSPLQNFSTQFEVKEYVLPSFEVILEPSEKFLYIDDVKDFRVSITARYLYGKKLEGTAFVLFGVKMENEKRSIPQSLKRIQIQDGDGEAVLTRGMLQARFPNLQELVGHTLYISVTVLTESGSDMVEAERTGIHIVTSPYQIHFTKTPKYFKPGMPFELMVYVTNPDGSPAPRVPVKADDFQGTVSTQGN…	41	2315	1	1	1	386.731	771.448	2	771.449	-0.0006	0	21.27	0.23	R	SIPQSLK	R
1	2::tr|A0A151NL74|A0A151NL74_ALLMI	Uncharacterized protein OS=Alligator mississippiensis OX=8496 GN=Y1Q_0015779 PE=4 SV=1	3704	187765	86	86	69	69	46	1655	MEGSICYLAAVLLFCFPAVVHSQLYSLITPNVLRVESEEKVVVEANGLNAATEVTITVHDFPFKRQVLYLIKANLNPDEGMLTTATIKISSNQVKKDSRDNQYVLIQAKIKDVTLEKVVLLSFHSGYIFVQTDKTIYTPGSTVLCRIFAMGHKMEPLFKTVIVEFETPEGIIVKQSPVFSPMKTGIYSLNYNLPEIVNLGTWKVVAKFQDSPLQNFSTQFEVKEYVLPSFEVILEPSEKFLYIDDVKDFRVSITARYLYGKKLEGTAFVLFGVKMENEKRSIPQSLKRIQIQDGDGEAVLTRGMLQARFPNLQELVGHTLYISVTVLTESGSDMVEAERTGIHIVTSPYQIHFTKTPKYFKPGMPFELMVYVTNPDGSPAPRVPVKADDFQGTVSTQGN…	44	1001	1	1	1	387.709	773.403	2	773.403	-0.0005	0	34.41	0.017	R	LSQGVDR	Y
1	2::tr|A0A151NL74|A0A151NL74_ALLMI	Uncharacterized protein OS=Alligator mississippiensis OX=8496 GN=Y1Q_0015779 PE=4 SV=1	3704	187765	86	86	69	69	46	1655	MEGSICYLAAVLLFCFPAVVHSQLYSLITPNVLRVESEEKVVVEANGLNAATEVTITVHDFPFKRQVLYLIKANLNPDEGMLTTATIKISSNQVKKDSRDNQYVLIQAKIKDVTLEKVVLLSFHSGYIFVQTDKTIYTPGSTVLCRIFAMGHKMEPLFKTVIVEFETPEGIIVKQSPVFSPMKTGIYSLNYNLPEIVNLGTWKVVAKFQDSPLQNFSTQFEVKEYVLPSFEVILEPSEKFLYIDDVKDFRVSITARYLYGKKLEGTAFVLFGVKMENEKRSIPQSLKRIQIQDGDGEAVLTRGMLQARFPNLQELVGHTLYISVTVLTESGSDMVEAERTGIHIVTSPYQIHFTKTPKYFKPGMPFELMVYVTNPDGSPAPRVPVKADDFQGTVSTQGN…	48	721	1	1	1	388.219	774.423	2	774.424	-0.0005	0	35.46	0.013	K	ISSNQVK	K
1	2::tr|A0A151NL74|A0A151NL74_ALLMI	Uncharacterized protein OS=Alligator mississippiensis OX=8496 GN=Y1Q_0015779 PE=4 SV=1	3704	187765	86	86	69	69	46	1655	MEGSICYLAAVLLFCFPAVVHSQLYSLITPNVLRVESEEKVVVEANGLNAATEVTITVHDFPFKRQVLYLIKANLNPDEGMLTTATIKISSNQVKKDSRDNQYVLIQAKIKDVTLEKVVLLSFHSGYIFVQTDKTIYTPGSTVLCRIFAMGHKMEPLFKTVIVEFETPEGIIVKQSPVFSPMKTGIYSLNYNLPEIVNLGTWKVVAKFQDSPLQNFSTQFEVKEYVLPSFEVILEPSEKFLYIDDVKDFRVSITARYLYGKKLEGTAFVLFGVKMENEKRSIPQSLKRIQIQDGDGEAVLTRGMLQARFPNLQELVGHTLYISVTVLTESGSDMVEAERTGIHIVTSPYQIHFTKTPKYFKPGMPFELMVYVTNPDGSPAPRVPVKADDFQGTVSTQGN…	136	1922	1	1	1	402.207	802.399	2	802.401	-0.0019	0	20.83	0.27	K	VVPEGMR	M
1	2::tr|A0A151NL74|A0A151NL74_ALLMI	Uncharacterized protein OS=Alligator mississippiensis OX=8496 GN=Y1Q_0015779 PE=4 SV=1	3704	187765	86	86	69	69	46	1655	MEGSICYLAAVLLFCFPAVVHSQLYSLITPNVLRVESEEKVVVEANGLNAATEVTITVHDFPFKRQVLYLIKANLNPDEGMLTTATIKISSNQVKKDSRDNQYVLIQAKIKDVTLEKVVLLSFHSGYIFVQTDKTIYTPGSTVLCRIFAMGHKMEPLFKTVIVEFETPEGIIVKQSPVFSPMKTGIYSLNYNLPEIVNLGTWKVVAKFQDSPLQNFSTQFEVKEYVLPSFEVILEPSEKFLYIDDVKDFRVSITARYLYGKKLEGTAFVLFGVKMENEKRSIPQSLKRIQIQDGDGEAVLTRGMLQARFPNLQELVGHTLYISVTVLTESGSDMVEAERTGIHIVTSPYQIHFTKTPKYFKPGMPFELMVYVTNPDGSPAPRVPVKADDFQGTVSTQGN…	137	964	1	1	1	402.207	802.4	2	802.401	-0.0005	0	30.63	0.029	K	VVPEGMR	M
1	2::tr|A0A151NL74|A0A151NL74_ALLMI	Uncharacterized protein OS=Alligator mississippiensis OX=8496 GN=Y1Q_0015779 PE=4 SV=1	3704	187765	86	86	69	69	46	1655	MEGSICYLAAVLLFCFPAVVHSQLYSLITPNVLRVESEEKVVVEANGLNAATEVTITVHDFPFKRQVLYLIKANLNPDEGMLTTATIKISSNQVKKDSRDNQYVLIQAKIKDVTLEKVVLLSFHSGYIFVQTDKTIYTPGSTVLCRIFAMGHKMEPLFKTVIVEFETPEGIIVKQSPVFSPMKTGIYSLNYNLPEIVNLGTWKVVAKFQDSPLQNFSTQFEVKEYVLPSFEVILEPSEKFLYIDDVKDFRVSITARYLYGKKLEGTAFVLFGVKMENEKRSIPQSLKRIQIQDGDGEAVLTRGMLQARFPNLQELVGHTLYISVTVLTESGSDMVEAERTGIHIVTSPYQIHFTKTPKYFKPGMPFELMVYVTNPDGSPAPRVPVKADDFQGTVSTQGN…	138	2733	1	1	1	402.215	802.415	2	802.416	-0.0005	0	33.25	0.041	R	IFAMGHK	M
1	2::tr|A0A151NL74|A0A151NL74_ALLMI	Uncharacterized protein OS=Alligator mississippiensis OX=8496 GN=Y1Q_0015779 PE=4 SV=1	3704	187765	86	86	69	69	46	1655	MEGSICYLAAVLLFCFPAVVHSQLYSLITPNVLRVESEEKVVVEANGLNAATEVTITVHDFPFKRQVLYLIKANLNPDEGMLTTATIKISSNQVKKDSRDNQYVLIQAKIKDVTLEKVVLLSFHSGYIFVQTDKTIYTPGSTVLCRIFAMGHKMEPLFKTVIVEFETPEGIIVKQSPVFSPMKTGIYSLNYNLPEIVNLGTWKVVAKFQDSPLQNFSTQFEVKEYVLPSFEVILEPSEKFLYIDDVKDFRVSITARYLYGKKLEGTAFVLFGVKMENEKRSIPQSLKRIQIQDGDGEAVLTRGMLQARFPNLQELVGHTLYISVTVLTESGSDMVEAERTGIHIVTSPYQIHFTKTPKYFKPGMPFELMVYVTNPDGSPAPRVPVKADDFQGTVSTQGN…	201	5173	1	1	1	409.262	816.51	2	816.511	-0.0005	0	22.46	0.052	K	TIPVFLK	D
1	2::tr|A0A151NL74|A0A151NL74_ALLMI	Uncharacterized protein OS=Alligator mississippiensis OX=8496 GN=Y1Q_0015779 PE=4 SV=1	3704	187765	86	86	69	69	46	1655	MEGSICYLAAVLLFCFPAVVHSQLYSLITPNVLRVESEEKVVVEANGLNAATEVTITVHDFPFKRQVLYLIKANLNPDEGMLTTATIKISSNQVKKDSRDNQYVLIQAKIKDVTLEKVVLLSFHSGYIFVQTDKTIYTPGSTVLCRIFAMGHKMEPLFKTVIVEFETPEGIIVKQSPVFSPMKTGIYSLNYNLPEIVNLGTWKVVAKFQDSPLQNFSTQFEVKEYVLPSFEVILEPSEKFLYIDDVKDFRVSITARYLYGKKLEGTAFVLFGVKMENEKRSIPQSLKRIQIQDGDGEAVLTRGMLQARFPNLQELVGHTLYISVTVLTESGSDMVEAERTGIHIVTSPYQIHFTKTPKYFKPGMPFELMVYVTNPDGSPAPRVPVKADDFQGTVSTQGN…	444	4882	1	1	1	438.781	875.548	2	875.548	-0.0005	0	41	0.00062	R	QVLYLIK	A
1	2::tr|A0A151NL74|A0A151NL74_ALLMI	Uncharacterized protein OS=Alligator mississippiensis OX=8496 GN=Y1Q_0015779 PE=4 SV=1	3704	187765	86	86	69	69	46	1655	MEGSICYLAAVLLFCFPAVVHSQLYSLITPNVLRVESEEKVVVEANGLNAATEVTITVHDFPFKRQVLYLIKANLNPDEGMLTTATIKISSNQVKKDSRDNQYVLIQAKIKDVTLEKVVLLSFHSGYIFVQTDKTIYTPGSTVLCRIFAMGHKMEPLFKTVIVEFETPEGIIVKQSPVFSPMKTGIYSLNYNLPEIVNLGTWKVVAKFQDSPLQNFSTQFEVKEYVLPSFEVILEPSEKFLYIDDVKDFRVSITARYLYGKKLEGTAFVLFGVKMENEKRSIPQSLKRIQIQDGDGEAVLTRGMLQARFPNLQELVGHTLYISVTVLTESGSDMVEAERTGIHIVTSPYQIHFTKTPKYFKPGMPFELMVYVTNPDGSPAPRVPVKADDFQGTVSTQGN…	502	3690	1	1	1	452.747	903.48	2	903.481	-0.0019	0	29.86	0.13	R	QIYDLPR	L
1	2::tr|A0A151NL74|A0A151NL74_ALLMI	Uncharacterized protein OS=Alligator mississippiensis OX=8496 GN=Y1Q_0015779 PE=4 SV=1	3704	187765	86	86	69	69	46	1655	MEGSICYLAAVLLFCFPAVVHSQLYSLITPNVLRVESEEKVVVEANGLNAATEVTITVHDFPFKRQVLYLIKANLNPDEGMLTTATIKISSNQVKKDSRDNQYVLIQAKIKDVTLEKVVLLSFHSGYIFVQTDKTIYTPGSTVLCRIFAMGHKMEPLFKTVIVEFETPEGIIVKQSPVFSPMKTGIYSLNYNLPEIVNLGTWKVVAKFQDSPLQNFSTQFEVKEYVLPSFEVILEPSEKFLYIDDVKDFRVSITARYLYGKKLEGTAFVLFGVKMENEKRSIPQSLKRIQIQDGDGEAVLTRGMLQARFPNLQELVGHTLYISVTVLTESGSDMVEAERTGIHIVTSPYQIHFTKTPKYFKPGMPFELMVYVTNPDGSPAPRVPVKADDFQGTVSTQGN…	573	7046	1	1	1	463.242	924.47	2	924.471	-0.0005	0	29.2	0.066	K	DFFIDLR	L
1	2::tr|A0A151NL74|A0A151NL74_ALLMI	Uncharacterized protein OS=Alligator mississippiensis OX=8496 GN=Y1Q_0015779 PE=4 SV=1	3704	187765	86	86	69	69	46	1655	MEGSICYLAAVLLFCFPAVVHSQLYSLITPNVLRVESEEKVVVEANGLNAATEVTITVHDFPFKRQVLYLIKANLNPDEGMLTTATIKISSNQVKKDSRDNQYVLIQAKIKDVTLEKVVLLSFHSGYIFVQTDKTIYTPGSTVLCRIFAMGHKMEPLFKTVIVEFETPEGIIVKQSPVFSPMKTGIYSLNYNLPEIVNLGTWKVVAKFQDSPLQNFSTQFEVKEYVLPSFEVILEPSEKFLYIDDVKDFRVSITARYLYGKKLEGTAFVLFGVKMENEKRSIPQSLKRIQIQDGDGEAVLTRGMLQARFPNLQELVGHTLYISVTVLTESGSDMVEAERTGIHIVTSPYQIHFTKTPKYFKPGMPFELMVYVTNPDGSPAPRVPVKADDFQGTVSTQGN…	643	5353	1	1	1	471.784	941.554	2	941.555	-0.0002	0	59.31	4.9e-05	R	ELVLELAR	S
1	2::tr|A0A151NL74|A0A151NL74_ALLMI	Uncharacterized protein OS=Alligator mississippiensis OX=8496 GN=Y1Q_0015779 PE=4 SV=1	3704	187765	86	86	69	69	46	1655	MEGSICYLAAVLLFCFPAVVHSQLYSLITPNVLRVESEEKVVVEANGLNAATEVTITVHDFPFKRQVLYLIKANLNPDEGMLTTATIKISSNQVKKDSRDNQYVLIQAKIKDVTLEKVVLLSFHSGYIFVQTDKTIYTPGSTVLCRIFAMGHKMEPLFKTVIVEFETPEGIIVKQSPVFSPMKTGIYSLNYNLPEIVNLGTWKVVAKFQDSPLQNFSTQFEVKEYVLPSFEVILEPSEKFLYIDDVKDFRVSITARYLYGKKLEGTAFVLFGVKMENEKRSIPQSLKRIQIQDGDGEAVLTRGMLQARFPNLQELVGHTLYISVTVLTESGSDMVEAERTGIHIVTSPYQIHFTKTPKYFKPGMPFELMVYVTNPDGSPAPRVPVKADDFQGTVSTQGN…	660	1767	1	1	1	473.284	944.554	2	944.554	-0.0003	1	50.04	0.00049	K	IKDVTLEK	V
1	2::tr|A0A151NL74|A0A151NL74_ALLMI	Uncharacterized protein OS=Alligator mississippiensis OX=8496 GN=Y1Q_0015779 PE=4 SV=1	3704	187765	86	86	69	69	46	1655	MEGSICYLAAVLLFCFPAVVHSQLYSLITPNVLRVESEEKVVVEANGLNAATEVTITVHDFPFKRQVLYLIKANLNPDEGMLTTATIKISSNQVKKDSRDNQYVLIQAKIKDVTLEKVVLLSFHSGYIFVQTDKTIYTPGSTVLCRIFAMGHKMEPLFKTVIVEFETPEGIIVKQSPVFSPMKTGIYSLNYNLPEIVNLGTWKVVAKFQDSPLQNFSTQFEVKEYVLPSFEVILEPSEKFLYIDDVKDFRVSITARYLYGKKLEGTAFVLFGVKMENEKRSIPQSLKRIQIQDGDGEAVLTRGMLQARFPNLQELVGHTLYISVTVLTESGSDMVEAERTGIHIVTSPYQIHFTKTPKYFKPGMPFELMVYVTNPDGSPAPRVPVKADDFQGTVSTQGN…	682	1528	1	1	1	476.26	950.506	2	950.507	-0.001	1	38.99	0.0074	K	IKVEGDYK	A
1	2::tr|A0A151NL74|A0A151NL74_ALLMI	Uncharacterized protein OS=Alligator mississippiensis OX=8496 GN=Y1Q_0015779 PE=4 SV=1	3704	187765	86	86	69	69	46	1655	MEGSICYLAAVLLFCFPAVVHSQLYSLITPNVLRVESEEKVVVEANGLNAATEVTITVHDFPFKRQVLYLIKANLNPDEGMLTTATIKISSNQVKKDSRDNQYVLIQAKIKDVTLEKVVLLSFHSGYIFVQTDKTIYTPGSTVLCRIFAMGHKMEPLFKTVIVEFETPEGIIVKQSPVFSPMKTGIYSLNYNLPEIVNLGTWKVVAKFQDSPLQNFSTQFEVKEYVLPSFEVILEPSEKFLYIDDVKDFRVSITARYLYGKKLEGTAFVLFGVKMENEKRSIPQSLKRIQIQDGDGEAVLTRGMLQARFPNLQELVGHTLYISVTVLTESGSDMVEAERTGIHIVTSPYQIHFTKTPKYFKPGMPFELMVYVTNPDGSPAPRVPVKADDFQGTVSTQGN…	684	1870	1	1	1	477.274	952.534	2	952.534	0	0	42.69	0.0017	R	SVQLIEHK	A
1	2::tr|A0A151NL74|A0A151NL74_ALLMI	Uncharacterized protein OS=Alligator mississippiensis OX=8496 GN=Y1Q_0015779 PE=4 SV=1	3704	187765	86	86	69	69	46	1655	MEGSICYLAAVLLFCFPAVVHSQLYSLITPNVLRVESEEKVVVEANGLNAATEVTITVHDFPFKRQVLYLIKANLNPDEGMLTTATIKISSNQVKKDSRDNQYVLIQAKIKDVTLEKVVLLSFHSGYIFVQTDKTIYTPGSTVLCRIFAMGHKMEPLFKTVIVEFETPEGIIVKQSPVFSPMKTGIYSLNYNLPEIVNLGTWKVVAKFQDSPLQNFSTQFEVKEYVLPSFEVILEPSEKFLYIDDVKDFRVSITARYLYGKKLEGTAFVLFGVKMENEKRSIPQSLKRIQIQDGDGEAVLTRGMLQARFPNLQELVGHTLYISVTVLTESGSDMVEAERTGIHIVTSPYQIHFTKTPKYFKPGMPFELMVYVTNPDGSPAPRVPVKADDFQGTVSTQGN…	781	2499	1	1	1	485.239	968.464	2	968.464	0	0	52.33	0.00035	R	AMYIQDTK	E
1	2::tr|A0A151NL74|A0A151NL74_ALLMI	Uncharacterized protein OS=Alligator mississippiensis OX=8496 GN=Y1Q_0015779 PE=4 SV=1	3704	187765	86	86	69	69	46	1655	MEGSICYLAAVLLFCFPAVVHSQLYSLITPNVLRVESEEKVVVEANGLNAATEVTITVHDFPFKRQVLYLIKANLNPDEGMLTTATIKISSNQVKKDSRDNQYVLIQAKIKDVTLEKVVLLSFHSGYIFVQTDKTIYTPGSTVLCRIFAMGHKMEPLFKTVIVEFETPEGIIVKQSPVFSPMKTGIYSLNYNLPEIVNLGTWKVVAKFQDSPLQNFSTQFEVKEYVLPSFEVILEPSEKFLYIDDVKDFRVSITARYLYGKKLEGTAFVLFGVKMENEKRSIPQSLKRIQIQDGDGEAVLTRGMLQARFPNLQELVGHTLYISVTVLTESGSDMVEAERTGIHIVTSPYQIHFTKTPKYFKPGMPFELMVYVTNPDGSPAPRVPVKADDFQGTVSTQGN…	855	1709	1	1	1	493.236	984.457	2	984.459	-0.0011	0	43.45	0.0019	R	AMYIQDTK	E
1	2::tr|A0A151NL74|A0A151NL74_ALLMI	Uncharacterized protein OS=Alligator mississippiensis OX=8496 GN=Y1Q_0015779 PE=4 SV=1	3704	187765	86	86	69	69	46	1655	MEGSICYLAAVLLFCFPAVVHSQLYSLITPNVLRVESEEKVVVEANGLNAATEVTITVHDFPFKRQVLYLIKANLNPDEGMLTTATIKISSNQVKKDSRDNQYVLIQAKIKDVTLEKVVLLSFHSGYIFVQTDKTIYTPGSTVLCRIFAMGHKMEPLFKTVIVEFETPEGIIVKQSPVFSPMKTGIYSLNYNLPEIVNLGTWKVVAKFQDSPLQNFSTQFEVKEYVLPSFEVILEPSEKFLYIDDVKDFRVSITARYLYGKKLEGTAFVLFGVKMENEKRSIPQSLKRIQIQDGDGEAVLTRGMLQARFPNLQELVGHTLYISVTVLTESGSDMVEAERTGIHIVTSPYQIHFTKTPKYFKPGMPFELMVYVTNPDGSPAPRVPVKADDFQGTVSTQGN…	929	4611	1	1	1	500.779	999.542	2	999.542	0.0001	0	36.57	0.017	K	LILNMPGDK	E
1	2::tr|A0A151NL74|A0A151NL74_ALLMI	Uncharacterized protein OS=Alligator mississippiensis OX=8496 GN=Y1Q_0015779 PE=4 SV=1	3704	187765	86	86	69	69	46	1655	MEGSICYLAAVLLFCFPAVVHSQLYSLITPNVLRVESEEKVVVEANGLNAATEVTITVHDFPFKRQVLYLIKANLNPDEGMLTTATIKISSNQVKKDSRDNQYVLIQAKIKDVTLEKVVLLSFHSGYIFVQTDKTIYTPGSTVLCRIFAMGHKMEPLFKTVIVEFETPEGIIVKQSPVFSPMKTGIYSLNYNLPEIVNLGTWKVVAKFQDSPLQNFSTQFEVKEYVLPSFEVILEPSEKFLYIDDVKDFRVSITARYLYGKKLEGTAFVLFGVKMENEKRSIPQSLKRIQIQDGDGEAVLTRGMLQARFPNLQELVGHTLYISVTVLTESGSDMVEAERTGIHIVTSPYQIHFTKTPKYFKPGMPFELMVYVTNPDGSPAPRVPVKADDFQGTVSTQGN…	958	3360	1	1	1	503.25	1004.49	2	1004.48	0.0002	0	50.21	0.0011	K	MDSPVTLDK	R
1	2::tr|A0A151NL74|A0A151NL74_ALLMI	Uncharacterized protein OS=Alligator mississippiensis OX=8496 GN=Y1Q_0015779 PE=4 SV=1	3704	187765	86	86	69	69	46	1655	MEGSICYLAAVLLFCFPAVVHSQLYSLITPNVLRVESEEKVVVEANGLNAATEVTITVHDFPFKRQVLYLIKANLNPDEGMLTTATIKISSNQVKKDSRDNQYVLIQAKIKDVTLEKVVLLSFHSGYIFVQTDKTIYTPGSTVLCRIFAMGHKMEPLFKTVIVEFETPEGIIVKQSPVFSPMKTGIYSLNYNLPEIVNLGTWKVVAKFQDSPLQNFSTQFEVKEYVLPSFEVILEPSEKFLYIDDVKDFRVSITARYLYGKKLEGTAFVLFGVKMENEKRSIPQSLKRIQIQDGDGEAVLTRGMLQARFPNLQELVGHTLYISVTVLTESGSDMVEAERTGIHIVTSPYQIHFTKTPKYFKPGMPFELMVYVTNPDGSPAPRVPVKADDFQGTVSTQGN…	969	2607	1	1	1	504.795	1007.58	2	1007.58	-0.001	0	41.22	0.0019	K	AHVGLVAVDK	G
1	2::tr|A0A151NL74|A0A151NL74_ALLMI	Uncharacterized protein OS=Alligator mississippiensis OX=8496 GN=Y1Q_0015779 PE=4 SV=1	3704	187765	86	86	69	69	46	1655	MEGSICYLAAVLLFCFPAVVHSQLYSLITPNVLRVESEEKVVVEANGLNAATEVTITVHDFPFKRQVLYLIKANLNPDEGMLTTATIKISSNQVKKDSRDNQYVLIQAKIKDVTLEKVVLLSFHSGYIFVQTDKTIYTPGSTVLCRIFAMGHKMEPLFKTVIVEFETPEGIIVKQSPVFSPMKTGIYSLNYNLPEIVNLGTWKVVAKFQDSPLQNFSTQFEVKEYVLPSFEVILEPSEKFLYIDDVKDFRVSITARYLYGKKLEGTAFVLFGVKMENEKRSIPQSLKRIQIQDGDGEAVLTRGMLQARFPNLQELVGHTLYISVTVLTESGSDMVEAERTGIHIVTSPYQIHFTKTPKYFKPGMPFELMVYVTNPDGSPAPRVPVKADDFQGTVSTQGN…	973	1520	1	1	1	505.259	1008.5	2	1008.51	-0.0022	0	36.75	0.018	R	IHEPGTPMK	I
1	2::tr|A0A151NL74|A0A151NL74_ALLMI	Uncharacterized protein OS=Alligator mississippiensis OX=8496 GN=Y1Q_0015779 PE=4 SV=1	3704	187765	86	86	69	69	46	1655	MEGSICYLAAVLLFCFPAVVHSQLYSLITPNVLRVESEEKVVVEANGLNAATEVTITVHDFPFKRQVLYLIKANLNPDEGMLTTATIKISSNQVKKDSRDNQYVLIQAKIKDVTLEKVVLLSFHSGYIFVQTDKTIYTPGSTVLCRIFAMGHKMEPLFKTVIVEFETPEGIIVKQSPVFSPMKTGIYSLNYNLPEIVNLGTWKVVAKFQDSPLQNFSTQFEVKEYVLPSFEVILEPSEKFLYIDDVKDFRVSITARYLYGKKLEGTAFVLFGVKMENEKRSIPQSLKRIQIQDGDGEAVLTRGMLQARFPNLQELVGHTLYISVTVLTESGSDMVEAERTGIHIVTSPYQIHFTKTPKYFKPGMPFELMVYVTNPDGSPAPRVPVKADDFQGTVSTQGN…	1008	877	1	1	1	508.723	1015.43	2	1015.43	-0.0006	0	43.41	0.00094	K	ICHGDVCR	C
1	2::tr|A0A151NL74|A0A151NL74_ALLMI	Uncharacterized protein OS=Alligator mississippiensis OX=8496 GN=Y1Q_0015779 PE=4 SV=1	3704	187765	86	86	69	69	46	1655	MEGSICYLAAVLLFCFPAVVHSQLYSLITPNVLRVESEEKVVVEANGLNAATEVTITVHDFPFKRQVLYLIKANLNPDEGMLTTATIKISSNQVKKDSRDNQYVLIQAKIKDVTLEKVVLLSFHSGYIFVQTDKTIYTPGSTVLCRIFAMGHKMEPLFKTVIVEFETPEGIIVKQSPVFSPMKTGIYSLNYNLPEIVNLGTWKVVAKFQDSPLQNFSTQFEVKEYVLPSFEVILEPSEKFLYIDDVKDFRVSITARYLYGKKLEGTAFVLFGVKMENEKRSIPQSLKRIQIQDGDGEAVLTRGMLQARFPNLQELVGHTLYISVTVLTESGSDMVEAERTGIHIVTSPYQIHFTKTPKYFKPGMPFELMVYVTNPDGSPAPRVPVKADDFQGTVSTQGN…	1025	3610	1	1	1	510.763	1019.51	2	1019.51	0.0003	0	53.8	0.00048	K	QSPVFSPMK	T
1	2::tr|A0A151NL74|A0A151NL74_ALLMI	Uncharacterized protein OS=Alligator mississippiensis OX=8496 GN=Y1Q_0015779 PE=4 SV=1	3704	187765	86	86	69	69	46	1655	MEGSICYLAAVLLFCFPAVVHSQLYSLITPNVLRVESEEKVVVEANGLNAATEVTITVHDFPFKRQVLYLIKANLNPDEGMLTTATIKISSNQVKKDSRDNQYVLIQAKIKDVTLEKVVLLSFHSGYIFVQTDKTIYTPGSTVLCRIFAMGHKMEPLFKTVIVEFETPEGIIVKQSPVFSPMKTGIYSLNYNLPEIVNLGTWKVVAKFQDSPLQNFSTQFEVKEYVLPSFEVILEPSEKFLYIDDVKDFRVSITARYLYGKKLEGTAFVLFGVKMENEKRSIPQSLKRIQIQDGDGEAVLTRGMLQARFPNLQELVGHTLYISVTVLTESGSDMVEAERTGIHIVTSPYQIHFTKTPKYFKPGMPFELMVYVTNPDGSPAPRVPVKADDFQGTVSTQGN…	1073	5217	1	1	1	516.8	1031.58	2	1031.57	0.0197	0	27.68	0.1	K	FELTGPIVR	W
1	2::tr|A0A151NL74|A0A151NL74_ALLMI	Uncharacterized protein OS=Alligator mississippiensis OX=8496 GN=Y1Q_0015779 PE=4 SV=1	3704	187765	86	86	69	69	46	1655	MEGSICYLAAVLLFCFPAVVHSQLYSLITPNVLRVESEEKVVVEANGLNAATEVTITVHDFPFKRQVLYLIKANLNPDEGMLTTATIKISSNQVKKDSRDNQYVLIQAKIKDVTLEKVVLLSFHSGYIFVQTDKTIYTPGSTVLCRIFAMGHKMEPLFKTVIVEFETPEGIIVKQSPVFSPMKTGIYSLNYNLPEIVNLGTWKVVAKFQDSPLQNFSTQFEVKEYVLPSFEVILEPSEKFLYIDDVKDFRVSITARYLYGKKLEGTAFVLFGVKMENEKRSIPQSLKRIQIQDGDGEAVLTRGMLQARFPNLQELVGHTLYISVTVLTESGSDMVEAERTGIHIVTSPYQIHFTKTPKYFKPGMPFELMVYVTNPDGSPAPRVPVKADDFQGTVSTQGN…	1137	1176	1	1	1	525.735	1049.46	2	1049.46	-0.0004	0	70.79	4.2e-06	K	SDIGCTAGGGR	D
1	2::tr|A0A151NL74|A0A151NL74_ALLMI	Uncharacterized protein OS=Alligator mississippiensis OX=8496 GN=Y1Q_0015779 PE=4 SV=1	3704	187765	86	86	69	69	46	1655	MEGSICYLAAVLLFCFPAVVHSQLYSLITPNVLRVESEEKVVVEANGLNAATEVTITVHDFPFKRQVLYLIKANLNPDEGMLTTATIKISSNQVKKDSRDNQYVLIQAKIKDVTLEKVVLLSFHSGYIFVQTDKTIYTPGSTVLCRIFAMGHKMEPLFKTVIVEFETPEGIIVKQSPVFSPMKTGIYSLNYNLPEIVNLGTWKVVAKFQDSPLQNFSTQFEVKEYVLPSFEVILEPSEKFLYIDDVKDFRVSITARYLYGKKLEGTAFVLFGVKMENEKRSIPQSLKRIQIQDGDGEAVLTRGMLQARFPNLQELVGHTLYISVTVLTESGSDMVEAERTGIHIVTSPYQIHFTKTPKYFKPGMPFELMVYVTNPDGSPAPRVPVKADDFQGTVSTQGN…	1206	4705	1	1	1	533.793	1065.57	2	1065.57	0.0008	0	47.36	0.00096	K	NELSYIISK	D
1	2::tr|A0A151NL74|A0A151NL74_ALLMI	Uncharacterized protein OS=Alligator mississippiensis OX=8496 GN=Y1Q_0015779 PE=4 SV=1	3704	187765	86	86	69	69	46	1655	MEGSICYLAAVLLFCFPAVVHSQLYSLITPNVLRVESEEKVVVEANGLNAATEVTITVHDFPFKRQVLYLIKANLNPDEGMLTTATIKISSNQVKKDSRDNQYVLIQAKIKDVTLEKVVLLSFHSGYIFVQTDKTIYTPGSTVLCRIFAMGHKMEPLFKTVIVEFETPEGIIVKQSPVFSPMKTGIYSLNYNLPEIVNLGTWKVVAKFQDSPLQNFSTQFEVKEYVLPSFEVILEPSEKFLYIDDVKDFRVSITARYLYGKKLEGTAFVLFGVKMENEKRSIPQSLKRIQIQDGDGEAVLTRGMLQARFPNLQELVGHTLYISVTVLTESGSDMVEAERTGIHIVTSPYQIHFTKTPKYFKPGMPFELMVYVTNPDGSPAPRVPVKADDFQGTVSTQGN…	1222	2485	1	1	1	537.774	1073.53	2	1073.54	-0.0011	0	35.11	0.038	R	ESLNLEQNK	D
1	2::tr|A0A151NL74|A0A151NL74_ALLMI	Uncharacterized protein OS=Alligator mississippiensis OX=8496 GN=Y1Q_0015779 PE=4 SV=1	3704	187765	86	86	69	69	46	1655	MEGSICYLAAVLLFCFPAVVHSQLYSLITPNVLRVESEEKVVVEANGLNAATEVTITVHDFPFKRQVLYLIKANLNPDEGMLTTATIKISSNQVKKDSRDNQYVLIQAKIKDVTLEKVVLLSFHSGYIFVQTDKTIYTPGSTVLCRIFAMGHKMEPLFKTVIVEFETPEGIIVKQSPVFSPMKTGIYSLNYNLPEIVNLGTWKVVAKFQDSPLQNFSTQFEVKEYVLPSFEVILEPSEKFLYIDDVKDFRVSITARYLYGKKLEGTAFVLFGVKMENEKRSIPQSLKRIQIQDGDGEAVLTRGMLQARFPNLQELVGHTLYISVTVLTESGSDMVEAERTGIHIVTSPYQIHFTKTPKYFKPGMPFELMVYVTNPDGSPAPRVPVKADDFQGTVSTQGN…	1433	4172	1	1	1	562.278	1122.54	2	1122.54	0.0006	0	53.42	0.0004	K	DTCMGTLVVK	G
1	2::tr|A0A151NL74|A0A151NL74_ALLMI	Uncharacterized protein OS=Alligator mississippiensis OX=8496 GN=Y1Q_0015779 PE=4 SV=1	3704	187765	86	86	69	69	46	1655	MEGSICYLAAVLLFCFPAVVHSQLYSLITPNVLRVESEEKVVVEANGLNAATEVTITVHDFPFKRQVLYLIKANLNPDEGMLTTATIKISSNQVKKDSRDNQYVLIQAKIKDVTLEKVVLLSFHSGYIFVQTDKTIYTPGSTVLCRIFAMGHKMEPLFKTVIVEFETPEGIIVKQSPVFSPMKTGIYSLNYNLPEIVNLGTWKVVAKFQDSPLQNFSTQFEVKEYVLPSFEVILEPSEKFLYIDDVKDFRVSITARYLYGKKLEGTAFVLFGVKMENEKRSIPQSLKRIQIQDGDGEAVLTRGMLQARFPNLQELVGHTLYISVTVLTESGSDMVEAERTGIHIVTSPYQIHFTKTPKYFKPGMPFELMVYVTNPDGSPAPRVPVKADDFQGTVSTQGN…	1486	4721	1	1	1	567.819	1133.62	2	1133.62	-0.0004	0	43.73	0.003	K	HFSYLILNK	G
1	2::tr|A0A151NL74|A0A151NL74_ALLMI	Uncharacterized protein OS=Alligator mississippiensis OX=8496 GN=Y1Q_0015779 PE=4 SV=1	3704	187765	86	86	69	69	46	1655	MEGSICYLAAVLLFCFPAVVHSQLYSLITPNVLRVESEEKVVVEANGLNAATEVTITVHDFPFKRQVLYLIKANLNPDEGMLTTATIKISSNQVKKDSRDNQYVLIQAKIKDVTLEKVVLLSFHSGYIFVQTDKTIYTPGSTVLCRIFAMGHKMEPLFKTVIVEFETPEGIIVKQSPVFSPMKTGIYSLNYNLPEIVNLGTWKVVAKFQDSPLQNFSTQFEVKEYVLPSFEVILEPSEKFLYIDDVKDFRVSITARYLYGKKLEGTAFVLFGVKMENEKRSIPQSLKRIQIQDGDGEAVLTRGMLQARFPNLQELVGHTLYISVTVLTESGSDMVEAERTGIHIVTSPYQIHFTKTPKYFKPGMPFELMVYVTNPDGSPAPRVPVKADDFQGTVSTQGN…	1502	2526	1	1	1	380.224	1137.65	3	1137.65	-0.0013	0	38.03	0.0041	R	VSVENIPRPK	N
1	2::tr|A0A151NL74|A0A151NL74_ALLMI	Uncharacterized protein OS=Alligator mississippiensis OX=8496 GN=Y1Q_0015779 PE=4 SV=1	3704	187765	86	86	69	69	46	1655	MEGSICYLAAVLLFCFPAVVHSQLYSLITPNVLRVESEEKVVVEANGLNAATEVTITVHDFPFKRQVLYLIKANLNPDEGMLTTATIKISSNQVKKDSRDNQYVLIQAKIKDVTLEKVVLLSFHSGYIFVQTDKTIYTPGSTVLCRIFAMGHKMEPLFKTVIVEFETPEGIIVKQSPVFSPMKTGIYSLNYNLPEIVNLGTWKVVAKFQDSPLQNFSTQFEVKEYVLPSFEVILEPSEKFLYIDDVKDFRVSITARYLYGKKLEGTAFVLFGVKMENEKRSIPQSLKRIQIQDGDGEAVLTRGMLQARFPNLQELVGHTLYISVTVLTESGSDMVEAERTGIHIVTSPYQIHFTKTPKYFKPGMPFELMVYVTNPDGSPAPRVPVKADDFQGTVSTQGN…	1503	2542	1	1	1	569.832	1137.65	2	1137.65	-0.0006	0	40.61	0.0023	R	VSVENIPRPK	N
1	2::tr|A0A151NL74|A0A151NL74_ALLMI	Uncharacterized protein OS=Alligator mississippiensis OX=8496 GN=Y1Q_0015779 PE=4 SV=1	3704	187765	86	86	69	69	46	1655	MEGSICYLAAVLLFCFPAVVHSQLYSLITPNVLRVESEEKVVVEANGLNAATEVTITVHDFPFKRQVLYLIKANLNPDEGMLTTATIKISSNQVKKDSRDNQYVLIQAKIKDVTLEKVVLLSFHSGYIFVQTDKTIYTPGSTVLCRIFAMGHKMEPLFKTVIVEFETPEGIIVKQSPVFSPMKTGIYSLNYNLPEIVNLGTWKVVAKFQDSPLQNFSTQFEVKEYVLPSFEVILEPSEKFLYIDDVKDFRVSITARYLYGKKLEGTAFVLFGVKMENEKRSIPQSLKRIQIQDGDGEAVLTRGMLQARFPNLQELVGHTLYISVTVLTESGSDMVEAERTGIHIVTSPYQIHFTKTPKYFKPGMPFELMVYVTNPDGSPAPRVPVKADDFQGTVSTQGN…	1528	1407	1	1	1	572.273	1142.53	2	1142.53	-0.0011	0	90.5	5.1e-08	K	AGTDENPVGQR	R
1	2::tr|A0A151NL74|A0A151NL74_ALLMI	Uncharacterized protein OS=Alligator mississippiensis OX=8496 GN=Y1Q_0015779 PE=4 SV=1	3704	187765	86	86	69	69	46	1655	MEGSICYLAAVLLFCFPAVVHSQLYSLITPNVLRVESEEKVVVEANGLNAATEVTITVHDFPFKRQVLYLIKANLNPDEGMLTTATIKISSNQVKKDSRDNQYVLIQAKIKDVTLEKVVLLSFHSGYIFVQTDKTIYTPGSTVLCRIFAMGHKMEPLFKTVIVEFETPEGIIVKQSPVFSPMKTGIYSLNYNLPEIVNLGTWKVVAKFQDSPLQNFSTQFEVKEYVLPSFEVILEPSEKFLYIDDVKDFRVSITARYLYGKKLEGTAFVLFGVKMENEKRSIPQSLKRIQIQDGDGEAVLTRGMLQARFPNLQELVGHTLYISVTVLTESGSDMVEAERTGIHIVTSPYQIHFTKTPKYFKPGMPFELMVYVTNPDGSPAPRVPVKADDFQGTVSTQGN…	1578	3404	1	1	1	575.797	1149.58	2	1149.58	0.0008	0	73.95	4.2e-06	R	IENSNAFLSR	S
1	2::tr|A0A151NL74|A0A151NL74_ALLMI	Uncharacterized protein OS=Alligator mississippiensis OX=8496 GN=Y1Q_0015779 PE=4 SV=1	3704	187765	86	86	69	69	46	1655	MEGSICYLAAVLLFCFPAVVHSQLYSLITPNVLRVESEEKVVVEANGLNAATEVTITVHDFPFKRQVLYLIKANLNPDEGMLTTATIKISSNQVKKDSRDNQYVLIQAKIKDVTLEKVVLLSFHSGYIFVQTDKTIYTPGSTVLCRIFAMGHKMEPLFKTVIVEFETPEGIIVKQSPVFSPMKTGIYSLNYNLPEIVNLGTWKVVAKFQDSPLQNFSTQFEVKEYVLPSFEVILEPSEKFLYIDDVKDFRVSITARYLYGKKLEGTAFVLFGVKMENEKRSIPQSLKRIQIQDGDGEAVLTRGMLQARFPNLQELVGHTLYISVTVLTESGSDMVEAERTGIHIVTSPYQIHFTKTPKYFKPGMPFELMVYVTNPDGSPAPRVPVKADDFQGTVSTQGN…	1587	4054	1	1	1	576.289	1150.56	2	1150.56	0.0024	0	51.04	0.00084	R	IENSNAFLSR	S
1	2::tr|A0A151NL74|A0A151NL74_ALLMI	Uncharacterized protein OS=Alligator mississippiensis OX=8496 GN=Y1Q_0015779 PE=4 SV=1	3704	187765	86	86	69	69	46	1655	MEGSICYLAAVLLFCFPAVVHSQLYSLITPNVLRVESEEKVVVEANGLNAATEVTITVHDFPFKRQVLYLIKANLNPDEGMLTTATIKISSNQVKKDSRDNQYVLIQAKIKDVTLEKVVLLSFHSGYIFVQTDKTIYTPGSTVLCRIFAMGHKMEPLFKTVIVEFETPEGIIVKQSPVFSPMKTGIYSLNYNLPEIVNLGTWKVVAKFQDSPLQNFSTQFEVKEYVLPSFEVILEPSEKFLYIDDVKDFRVSITARYLYGKKLEGTAFVLFGVKMENEKRSIPQSLKRIQIQDGDGEAVLTRGMLQARFPNLQELVGHTLYISVTVLTESGSDMVEAERTGIHIVTSPYQIHFTKTPKYFKPGMPFELMVYVTNPDGSPAPRVPVKADDFQGTVSTQGN…	1623	4219	1	1	1	387.232	1158.68	3	1158.68	-0.0007	1	41.67	0.0025	K	KFELTGPIVR	W
1	2::tr|A0A151NL74|A0A151NL74_ALLMI	Uncharacterized protein OS=Alligator mississippiensis OX=8496 GN=Y1Q_0015779 PE=4 SV=1	3704	187765	86	86	69	69	46	1655	MEGSICYLAAVLLFCFPAVVHSQLYSLITPNVLRVESEEKVVVEANGLNAATEVTITVHDFPFKRQVLYLIKANLNPDEGMLTTATIKISSNQVKKDSRDNQYVLIQAKIKDVTLEKVVLLSFHSGYIFVQTDKTIYTPGSTVLCRIFAMGHKMEPLFKTVIVEFETPEGIIVKQSPVFSPMKTGIYSLNYNLPEIVNLGTWKVVAKFQDSPLQNFSTQFEVKEYVLPSFEVILEPSEKFLYIDDVKDFRVSITARYLYGKKLEGTAFVLFGVKMENEKRSIPQSLKRIQIQDGDGEAVLTRGMLQARFPNLQELVGHTLYISVTVLTESGSDMVEAERTGIHIVTSPYQIHFTKTPKYFKPGMPFELMVYVTNPDGSPAPRVPVKADDFQGTVSTQGN…	1624	4231	1	1	1	580.345	1158.68	2	1158.68	-0.0006	1	61.16	2.9e-05	K	KFELTGPIVR	W
1	2::tr|A0A151NL74|A0A151NL74_ALLMI	Uncharacterized protein OS=Alligator mississippiensis OX=8496 GN=Y1Q_0015779 PE=4 SV=1	3704	187765	86	86	69	69	46	1655	MEGSICYLAAVLLFCFPAVVHSQLYSLITPNVLRVESEEKVVVEANGLNAATEVTITVHDFPFKRQVLYLIKANLNPDEGMLTTATIKISSNQVKKDSRDNQYVLIQAKIKDVTLEKVVLLSFHSGYIFVQTDKTIYTPGSTVLCRIFAMGHKMEPLFKTVIVEFETPEGIIVKQSPVFSPMKTGIYSLNYNLPEIVNLGTWKVVAKFQDSPLQNFSTQFEVKEYVLPSFEVILEPSEKFLYIDDVKDFRVSITARYLYGKKLEGTAFVLFGVKMENEKRSIPQSLKRIQIQDGDGEAVLTRGMLQARFPNLQELVGHTLYISVTVLTESGSDMVEAERTGIHIVTSPYQIHFTKTPKYFKPGMPFELMVYVTNPDGSPAPRVPVKADDFQGTVSTQGN…	1632	2579	1	1	1	387.869	1160.59	3	1160.59	-0.0007	1	43.61	0.0064	K	MDSPVTLDKR	I
1	2::tr|A0A151NL74|A0A151NL74_ALLMI	Uncharacterized protein OS=Alligator mississippiensis OX=8496 GN=Y1Q_0015779 PE=4 SV=1	3704	187765	86	86	69	69	46	1655	MEGSICYLAAVLLFCFPAVVHSQLYSLITPNVLRVESEEKVVVEANGLNAATEVTITVHDFPFKRQVLYLIKANLNPDEGMLTTATIKISSNQVKKDSRDNQYVLIQAKIKDVTLEKVVLLSFHSGYIFVQTDKTIYTPGSTVLCRIFAMGHKMEPLFKTVIVEFETPEGIIVKQSPVFSPMKTGIYSLNYNLPEIVNLGTWKVVAKFQDSPLQNFSTQFEVKEYVLPSFEVILEPSEKFLYIDDVKDFRVSITARYLYGKKLEGTAFVLFGVKMENEKRSIPQSLKRIQIQDGDGEAVLTRGMLQARFPNLQELVGHTLYISVTVLTESGSDMVEAERTGIHIVTSPYQIHFTKTPKYFKPGMPFELMVYVTNPDGSPAPRVPVKADDFQGTVSTQGN…	1749	4315	1	1	1	596.322	1190.63	2	1190.63	-0.0006	0	55.27	0.00034	R	DNQYVLIQAK	I
1	2::tr|A0A151NL74|A0A151NL74_ALLMI	Uncharacterized protein OS=Alligator mississippiensis OX=8496 GN=Y1Q_0015779 PE=4 SV=1	3704	187765	86	86	69	69	46	1655	MEGSICYLAAVLLFCFPAVVHSQLYSLITPNVLRVESEEKVVVEANGLNAATEVTITVHDFPFKRQVLYLIKANLNPDEGMLTTATIKISSNQVKKDSRDNQYVLIQAKIKDVTLEKVVLLSFHSGYIFVQTDKTIYTPGSTVLCRIFAMGHKMEPLFKTVIVEFETPEGIIVKQSPVFSPMKTGIYSLNYNLPEIVNLGTWKVVAKFQDSPLQNFSTQFEVKEYVLPSFEVILEPSEKFLYIDDVKDFRVSITARYLYGKKLEGTAFVLFGVKMENEKRSIPQSLKRIQIQDGDGEAVLTRGMLQARFPNLQELVGHTLYISVTVLTESGSDMVEAERTGIHIVTSPYQIHFTKTPKYFKPGMPFELMVYVTNPDGSPAPRVPVKADDFQGTVSTQGN…	1827	2150	1	1	1	403.857	1208.55	3	1208.55	-0.0008	1	35.75	0.023	K	FEMDKAPSER	A
1	2::tr|A0A151NL74|A0A151NL74_ALLMI	Uncharacterized protein OS=Alligator mississippiensis OX=8496 GN=Y1Q_0015779 PE=4 SV=1	3704	187765	86	86	69	69	46	1655	MEGSICYLAAVLLFCFPAVVHSQLYSLITPNVLRVESEEKVVVEANGLNAATEVTITVHDFPFKRQVLYLIKANLNPDEGMLTTATIKISSNQVKKDSRDNQYVLIQAKIKDVTLEKVVLLSFHSGYIFVQTDKTIYTPGSTVLCRIFAMGHKMEPLFKTVIVEFETPEGIIVKQSPVFSPMKTGIYSLNYNLPEIVNLGTWKVVAKFQDSPLQNFSTQFEVKEYVLPSFEVILEPSEKFLYIDDVKDFRVSITARYLYGKKLEGTAFVLFGVKMENEKRSIPQSLKRIQIQDGDGEAVLTRGMLQARFPNLQELVGHTLYISVTVLTESGSDMVEAERTGIHIVTSPYQIHFTKTPKYFKPGMPFELMVYVTNPDGSPAPRVPVKADDFQGTVSTQGN…	1860	5455	1	1	1	607.841	1213.67	2	1213.67	0	0	55.56	0.00024	K	TDNINILNGLK	H
1	2::tr|A0A151NL74|A0A151NL74_ALLMI	Uncharacterized protein OS=Alligator mississippiensis OX=8496 GN=Y1Q_0015779 PE=4 SV=1	3704	187765	86	86	69	69	46	1655	MEGSICYLAAVLLFCFPAVVHSQLYSLITPNVLRVESEEKVVVEANGLNAATEVTITVHDFPFKRQVLYLIKANLNPDEGMLTTATIKISSNQVKKDSRDNQYVLIQAKIKDVTLEKVVLLSFHSGYIFVQTDKTIYTPGSTVLCRIFAMGHKMEPLFKTVIVEFETPEGIIVKQSPVFSPMKTGIYSLNYNLPEIVNLGTWKVVAKFQDSPLQNFSTQFEVKEYVLPSFEVILEPSEKFLYIDDVKDFRVSITARYLYGKKLEGTAFVLFGVKMENEKRSIPQSLKRIQIQDGDGEAVLTRGMLQARFPNLQELVGHTLYISVTVLTESGSDMVEAERTGIHIVTSPYQIHFTKTPKYFKPGMPFELMVYVTNPDGSPAPRVPVKADDFQGTVSTQGN…	1864	5782	1	1	1	608.332	1214.65	2	1214.65	-0.0016	0	50.97	0.001	K	TDNINILNGLK	H
1	2::tr|A0A151NL74|A0A151NL74_ALLMI	Uncharacterized protein OS=Alligator mississippiensis OX=8496 GN=Y1Q_0015779 PE=4 SV=1	3704	187765	86	86	69	69	46	1655	MEGSICYLAAVLLFCFPAVVHSQLYSLITPNVLRVESEEKVVVEANGLNAATEVTITVHDFPFKRQVLYLIKANLNPDEGMLTTATIKISSNQVKKDSRDNQYVLIQAKIKDVTLEKVVLLSFHSGYIFVQTDKTIYTPGSTVLCRIFAMGHKMEPLFKTVIVEFETPEGIIVKQSPVFSPMKTGIYSLNYNLPEIVNLGTWKVVAKFQDSPLQNFSTQFEVKEYVLPSFEVILEPSEKFLYIDDVKDFRVSITARYLYGKKLEGTAFVLFGVKMENEKRSIPQSLKRIQIQDGDGEAVLTRGMLQARFPNLQELVGHTLYISVTVLTESGSDMVEAERTGIHIVTSPYQIHFTKTPKYFKPGMPFELMVYVTNPDGSPAPRVPVKADDFQGTVSTQGN…	1865	5100	1	1	1	608.332	1214.65	2	1214.65	-0.0016	0	51.36	0.00093	K	TDNINILNGLK	H
1	2::tr|A0A151NL74|A0A151NL74_ALLMI	Uncharacterized protein OS=Alligator mississippiensis OX=8496 GN=Y1Q_0015779 PE=4 SV=1	3704	187765	86	86	69	69	46	1655	MEGSICYLAAVLLFCFPAVVHSQLYSLITPNVLRVESEEKVVVEANGLNAATEVTITVHDFPFKRQVLYLIKANLNPDEGMLTTATIKISSNQVKKDSRDNQYVLIQAKIKDVTLEKVVLLSFHSGYIFVQTDKTIYTPGSTVLCRIFAMGHKMEPLFKTVIVEFETPEGIIVKQSPVFSPMKTGIYSLNYNLPEIVNLGTWKVVAKFQDSPLQNFSTQFEVKEYVLPSFEVILEPSEKFLYIDDVKDFRVSITARYLYGKKLEGTAFVLFGVKMENEKRSIPQSLKRIQIQDGDGEAVLTRGMLQARFPNLQELVGHTLYISVTVLTESGSDMVEAERTGIHIVTSPYQIHFTKTPKYFKPGMPFELMVYVTNPDGSPAPRVPVKADDFQGTVSTQGN…	2164	3689	1	1	1	429.236	1284.69	3	1284.69	-0.0008	1	46.36	0.0019	K	LILNMPGDKER	V
1	2::tr|A0A151NL74|A0A151NL74_ALLMI	Uncharacterized protein OS=Alligator mississippiensis OX=8496 GN=Y1Q_0015779 PE=4 SV=1	3704	187765	86	86	69	69	46	1655	MEGSICYLAAVLLFCFPAVVHSQLYSLITPNVLRVESEEKVVVEANGLNAATEVTITVHDFPFKRQVLYLIKANLNPDEGMLTTATIKISSNQVKKDSRDNQYVLIQAKIKDVTLEKVVLLSFHSGYIFVQTDKTIYTPGSTVLCRIFAMGHKMEPLFKTVIVEFETPEGIIVKQSPVFSPMKTGIYSLNYNLPEIVNLGTWKVVAKFQDSPLQNFSTQFEVKEYVLPSFEVILEPSEKFLYIDDVKDFRVSITARYLYGKKLEGTAFVLFGVKMENEKRSIPQSLKRIQIQDGDGEAVLTRGMLQARFPNLQELVGHTLYISVTVLTESGSDMVEAERTGIHIVTSPYQIHFTKTPKYFKPGMPFELMVYVTNPDGSPAPRVPVKADDFQGTVSTQGN…	2188	4278	1	1	1	646.288	1290.56	2	1290.56	-0.0018	0	53.53	0.00023	K	GDFSYSAFQNR	E
1	2::tr|A0A151NL74|A0A151NL74_ALLMI	Uncharacterized protein OS=Alligator mississippiensis OX=8496 GN=Y1Q_0015779 PE=4 SV=1	3704	187765	86	86	69	69	46	1655	MEGSICYLAAVLLFCFPAVVHSQLYSLITPNVLRVESEEKVVVEANGLNAATEVTITVHDFPFKRQVLYLIKANLNPDEGMLTTATIKISSNQVKKDSRDNQYVLIQAKIKDVTLEKVVLLSFHSGYIFVQTDKTIYTPGSTVLCRIFAMGHKMEPLFKTVIVEFETPEGIIVKQSPVFSPMKTGIYSLNYNLPEIVNLGTWKVVAKFQDSPLQNFSTQFEVKEYVLPSFEVILEPSEKFLYIDDVKDFRVSITARYLYGKKLEGTAFVLFGVKMENEKRSIPQSLKRIQIQDGDGEAVLTRGMLQARFPNLQELVGHTLYISVTVLTESGSDMVEAERTGIHIVTSPYQIHFTKTPKYFKPGMPFELMVYVTNPDGSPAPRVPVKADDFQGTVSTQGN…	2308	2712	1	1	1	656.813	1311.61	2	1311.61	-0.0007	0	105.05	2.7e-09	R	QASQSMVAEAYK	T
1	2::tr|A0A151NL74|A0A151NL74_ALLMI	Uncharacterized protein OS=Alligator mississippiensis OX=8496 GN=Y1Q_0015779 PE=4 SV=1	3704	187765	86	86	69	69	46	1655	MEGSICYLAAVLLFCFPAVVHSQLYSLITPNVLRVESEEKVVVEANGLNAATEVTITVHDFPFKRQVLYLIKANLNPDEGMLTTATIKISSNQVKKDSRDNQYVLIQAKIKDVTLEKVVLLSFHSGYIFVQTDKTIYTPGSTVLCRIFAMGHKMEPLFKTVIVEFETPEGIIVKQSPVFSPMKTGIYSLNYNLPEIVNLGTWKVVAKFQDSPLQNFSTQFEVKEYVLPSFEVILEPSEKFLYIDDVKDFRVSITARYLYGKKLEGTAFVLFGVKMENEKRSIPQSLKRIQIQDGDGEAVLTRGMLQARFPNLQELVGHTLYISVTVLTESGSDMVEAERTGIHIVTSPYQIHFTKTPKYFKPGMPFELMVYVTNPDGSPAPRVPVKADDFQGTVSTQGN…	2377	2701	1	1	1	663.835	1325.66	2	1325.66	-0.0014	0	64.89	3.3e-05	K	DHINSLEGSINK	A
1	2::tr|A0A151NL74|A0A151NL74_ALLMI	Uncharacterized protein OS=Alligator mississippiensis OX=8496 GN=Y1Q_0015779 PE=4 SV=1	3704	187765	86	86	69	69	46	1655	MEGSICYLAAVLLFCFPAVVHSQLYSLITPNVLRVESEEKVVVEANGLNAATEVTITVHDFPFKRQVLYLIKANLNPDEGMLTTATIKISSNQVKKDSRDNQYVLIQAKIKDVTLEKVVLLSFHSGYIFVQTDKTIYTPGSTVLCRIFAMGHKMEPLFKTVIVEFETPEGIIVKQSPVFSPMKTGIYSLNYNLPEIVNLGTWKVVAKFQDSPLQNFSTQFEVKEYVLPSFEVILEPSEKFLYIDDVKDFRVSITARYLYGKKLEGTAFVLFGVKMENEKRSIPQSLKRIQIQDGDGEAVLTRGMLQARFPNLQELVGHTLYISVTVLTESGSDMVEAERTGIHIVTSPYQIHFTKTPKYFKPGMPFELMVYVTNPDGSPAPRVPVKADDFQGTVSTQGN…	2378	2694	1	1	1	442.893	1325.66	3	1325.66	-0.0003	0	48.45	0.0015	K	DHINSLEGSINK	A
1	2::tr|A0A151NL74|A0A151NL74_ALLMI	Uncharacterized protein OS=Alligator mississippiensis OX=8496 GN=Y1Q_0015779 PE=4 SV=1	3704	187765	86	86	69	69	46	1655	MEGSICYLAAVLLFCFPAVVHSQLYSLITPNVLRVESEEKVVVEANGLNAATEVTITVHDFPFKRQVLYLIKANLNPDEGMLTTATIKISSNQVKKDSRDNQYVLIQAKIKDVTLEKVVLLSFHSGYIFVQTDKTIYTPGSTVLCRIFAMGHKMEPLFKTVIVEFETPEGIIVKQSPVFSPMKTGIYSLNYNLPEIVNLGTWKVVAKFQDSPLQNFSTQFEVKEYVLPSFEVILEPSEKFLYIDDVKDFRVSITARYLYGKKLEGTAFVLFGVKMENEKRSIPQSLKRIQIQDGDGEAVLTRGMLQARFPNLQELVGHTLYISVTVLTESGSDMVEAERTGIHIVTSPYQIHFTKTPKYFKPGMPFELMVYVTNPDGSPAPRVPVKADDFQGTVSTQGN…	2421	4529	1	1	1	447.57	1339.69	3	1339.69	-0.0007	0	25.62	0.25	K	SGDNLPVNFHLK	T
1	2::tr|A0A151NL74|A0A151NL74_ALLMI	Uncharacterized protein OS=Alligator mississippiensis OX=8496 GN=Y1Q_0015779 PE=4 SV=1	3704	187765	86	86	69	69	46	1655	MEGSICYLAAVLLFCFPAVVHSQLYSLITPNVLRVESEEKVVVEANGLNAATEVTITVHDFPFKRQVLYLIKANLNPDEGMLTTATIKISSNQVKKDSRDNQYVLIQAKIKDVTLEKVVLLSFHSGYIFVQTDKTIYTPGSTVLCRIFAMGHKMEPLFKTVIVEFETPEGIIVKQSPVFSPMKTGIYSLNYNLPEIVNLGTWKVVAKFQDSPLQNFSTQFEVKEYVLPSFEVILEPSEKFLYIDDVKDFRVSITARYLYGKKLEGTAFVLFGVKMENEKRSIPQSLKRIQIQDGDGEAVLTRGMLQARFPNLQELVGHTLYISVTVLTESGSDMVEAERTGIHIVTSPYQIHFTKTPKYFKPGMPFELMVYVTNPDGSPAPRVPVKADDFQGTVSTQGN…	2422	4533	1	1	1	670.852	1339.69	2	1339.69	0.0001	0	35.6	0.026	K	SGDNLPVNFHLK	T
1	2::tr|A0A151NL74|A0A151NL74_ALLMI	Uncharacterized protein OS=Alligator mississippiensis OX=8496 GN=Y1Q_0015779 PE=4 SV=1	3704	187765	86	86	69	69	46	1655	MEGSICYLAAVLLFCFPAVVHSQLYSLITPNVLRVESEEKVVVEANGLNAATEVTITVHDFPFKRQVLYLIKANLNPDEGMLTTATIKISSNQVKKDSRDNQYVLIQAKIKDVTLEKVVLLSFHSGYIFVQTDKTIYTPGSTVLCRIFAMGHKMEPLFKTVIVEFETPEGIIVKQSPVFSPMKTGIYSLNYNLPEIVNLGTWKVVAKFQDSPLQNFSTQFEVKEYVLPSFEVILEPSEKFLYIDDVKDFRVSITARYLYGKKLEGTAFVLFGVKMENEKRSIPQSLKRIQIQDGDGEAVLTRGMLQARFPNLQELVGHTLYISVTVLTESGSDMVEAERTGIHIVTSPYQIHFTKTPKYFKPGMPFELMVYVTNPDGSPAPRVPVKADDFQGTVSTQGN…	2522	5657	1	1	1	678.345	1354.68	2	1354.68	-0.0011	0	63.6	4.5e-05	R	ESSTWLTAYVAK	V
1	2::tr|A0A151NL74|A0A151NL74_ALLMI	Uncharacterized protein OS=Alligator mississippiensis OX=8496 GN=Y1Q_0015779 PE=4 SV=1	3704	187765	86	86	69	69	46	1655	MEGSICYLAAVLLFCFPAVVHSQLYSLITPNVLRVESEEKVVVEANGLNAATEVTITVHDFPFKRQVLYLIKANLNPDEGMLTTATIKISSNQVKKDSRDNQYVLIQAKIKDVTLEKVVLLSFHSGYIFVQTDKTIYTPGSTVLCRIFAMGHKMEPLFKTVIVEFETPEGIIVKQSPVFSPMKTGIYSLNYNLPEIVNLGTWKVVAKFQDSPLQNFSTQFEVKEYVLPSFEVILEPSEKFLYIDDVKDFRVSITARYLYGKKLEGTAFVLFGVKMENEKRSIPQSLKRIQIQDGDGEAVLTRGMLQARFPNLQELVGHTLYISVTVLTESGSDMVEAERTGIHIVTSPYQIHFTKTPKYFKPGMPFELMVYVTNPDGSPAPRVPVKADDFQGTVSTQGN…	2610	4202	1	1	1	684.353	1366.69	2	1366.69	-0.0004	0	59.83	0.00011	K	TIYTPGSTVLCR	I
1	2::tr|A0A151NL74|A0A151NL74_ALLMI	Uncharacterized protein OS=Alligator mississippiensis OX=8496 GN=Y1Q_0015779 PE=4 SV=1	3704	187765	86	86	69	69	46	1655	MEGSICYLAAVLLFCFPAVVHSQLYSLITPNVLRVESEEKVVVEANGLNAATEVTITVHDFPFKRQVLYLIKANLNPDEGMLTTATIKISSNQVKKDSRDNQYVLIQAKIKDVTLEKVVLLSFHSGYIFVQTDKTIYTPGSTVLCRIFAMGHKMEPLFKTVIVEFETPEGIIVKQSPVFSPMKTGIYSLNYNLPEIVNLGTWKVVAKFQDSPLQNFSTQFEVKEYVLPSFEVILEPSEKFLYIDDVKDFRVSITARYLYGKKLEGTAFVLFGVKMENEKRSIPQSLKRIQIQDGDGEAVLTRGMLQARFPNLQELVGHTLYISVTVLTESGSDMVEAERTGIHIVTSPYQIHFTKTPKYFKPGMPFELMVYVTNPDGSPAPRVPVKADDFQGTVSTQGN…	2632	4974	1	1	1	686.788	1371.56	2	1371.56	-0.001	0	79.44	2.6e-07	K	ECVAAFLDCCK	Y
1	2::tr|A0A151NL74|A0A151NL74_ALLMI	Uncharacterized protein OS=Alligator mississippiensis OX=8496 GN=Y1Q_0015779 PE=4 SV=1	3704	187765	86	86	69	69	46	1655	MEGSICYLAAVLLFCFPAVVHSQLYSLITPNVLRVESEEKVVVEANGLNAATEVTITVHDFPFKRQVLYLIKANLNPDEGMLTTATIKISSNQVKKDSRDNQYVLIQAKIKDVTLEKVVLLSFHSGYIFVQTDKTIYTPGSTVLCRIFAMGHKMEPLFKTVIVEFETPEGIIVKQSPVFSPMKTGIYSLNYNLPEIVNLGTWKVVAKFQDSPLQNFSTQFEVKEYVLPSFEVILEPSEKFLYIDDVKDFRVSITARYLYGKKLEGTAFVLFGVKMENEKRSIPQSLKRIQIQDGDGEAVLTRGMLQARFPNLQELVGHTLYISVTVLTESGSDMVEAERTGIHIVTSPYQIHFTKTPKYFKPGMPFELMVYVTNPDGSPAPRVPVKADDFQGTVSTQGN…	2837	6166	1	1	1	470.278	1407.81	3	1407.81	0.0003	1	38.4	0.003	K	KLEGTAFVLFGVK	M
1	2::tr|A0A151NL74|A0A151NL74_ALLMI	Uncharacterized protein OS=Alligator mississippiensis OX=8496 GN=Y1Q_0015779 PE=4 SV=1	3704	187765	86	86	69	69	46	1655	MEGSICYLAAVLLFCFPAVVHSQLYSLITPNVLRVESEEKVVVEANGLNAATEVTITVHDFPFKRQVLYLIKANLNPDEGMLTTATIKISSNQVKKDSRDNQYVLIQAKIKDVTLEKVVLLSFHSGYIFVQTDKTIYTPGSTVLCRIFAMGHKMEPLFKTVIVEFETPEGIIVKQSPVFSPMKTGIYSLNYNLPEIVNLGTWKVVAKFQDSPLQNFSTQFEVKEYVLPSFEVILEPSEKFLYIDDVKDFRVSITARYLYGKKLEGTAFVLFGVKMENEKRSIPQSLKRIQIQDGDGEAVLTRGMLQARFPNLQELVGHTLYISVTVLTESGSDMVEAERTGIHIVTSPYQIHFTKTPKYFKPGMPFELMVYVTNPDGSPAPRVPVKADDFQGTVSTQGN…	2880	3391	1	1	1	473.893	1418.66	3	1418.66	0.0004	1	42.1	0.0064	K	KGDFSYSAFQNR	E
1	2::tr|A0A151NL74|A0A151NL74_ALLMI	Uncharacterized protein OS=Alligator mississippiensis OX=8496 GN=Y1Q_0015779 PE=4 SV=1	3704	187765	86	86	69	69	46	1655	MEGSICYLAAVLLFCFPAVVHSQLYSLITPNVLRVESEEKVVVEANGLNAATEVTITVHDFPFKRQVLYLIKANLNPDEGMLTTATIKISSNQVKKDSRDNQYVLIQAKIKDVTLEKVVLLSFHSGYIFVQTDKTIYTPGSTVLCRIFAMGHKMEPLFKTVIVEFETPEGIIVKQSPVFSPMKTGIYSLNYNLPEIVNLGTWKVVAKFQDSPLQNFSTQFEVKEYVLPSFEVILEPSEKFLYIDDVKDFRVSITARYLYGKKLEGTAFVLFGVKMENEKRSIPQSLKRIQIQDGDGEAVLTRGMLQARFPNLQELVGHTLYISVTVLTESGSDMVEAERTGIHIVTSPYQIHFTKTPKYFKPGMPFELMVYVTNPDGSPAPRVPVKADDFQGTVSTQGN…	2950	5551	1	1	1	477.582	1429.72	3	1429.72	-0.0001	1	47.64	0.0025	K	FLYIDDVKDFR	V
1	2::tr|A0A151NL74|A0A151NL74_ALLMI	Uncharacterized protein OS=Alligator mississippiensis OX=8496 GN=Y1Q_0015779 PE=4 SV=1	3704	187765	86	86	69	69	46	1655	MEGSICYLAAVLLFCFPAVVHSQLYSLITPNVLRVESEEKVVVEANGLNAATEVTITVHDFPFKRQVLYLIKANLNPDEGMLTTATIKISSNQVKKDSRDNQYVLIQAKIKDVTLEKVVLLSFHSGYIFVQTDKTIYTPGSTVLCRIFAMGHKMEPLFKTVIVEFETPEGIIVKQSPVFSPMKTGIYSLNYNLPEIVNLGTWKVVAKFQDSPLQNFSTQFEVKEYVLPSFEVILEPSEKFLYIDDVKDFRVSITARYLYGKKLEGTAFVLFGVKMENEKRSIPQSLKRIQIQDGDGEAVLTRGMLQARFPNLQELVGHTLYISVTVLTESGSDMVEAERTGIHIVTSPYQIHFTKTPKYFKPGMPFELMVYVTNPDGSPAPRVPVKADDFQGTVSTQGN…	3048	2078	1	1	1	485.193	1452.56	3	1452.56	-0.0006	0	28.47	0.0099	R	CAEENCFMQHK	M
1	2::tr|A0A151NL74|A0A151NL74_ALLMI	Uncharacterized protein OS=Alligator mississippiensis OX=8496 GN=Y1Q_0015779 PE=4 SV=1	3704	187765	86	86	69	69	46	1655	MEGSICYLAAVLLFCFPAVVHSQLYSLITPNVLRVESEEKVVVEANGLNAATEVTITVHDFPFKRQVLYLIKANLNPDEGMLTTATIKISSNQVKKDSRDNQYVLIQAKIKDVTLEKVVLLSFHSGYIFVQTDKTIYTPGSTVLCRIFAMGHKMEPLFKTVIVEFETPEGIIVKQSPVFSPMKTGIYSLNYNLPEIVNLGTWKVVAKFQDSPLQNFSTQFEVKEYVLPSFEVILEPSEKFLYIDDVKDFRVSITARYLYGKKLEGTAFVLFGVKMENEKRSIPQSLKRIQIQDGDGEAVLTRGMLQARFPNLQELVGHTLYISVTVLTESGSDMVEAERTGIHIVTSPYQIHFTKTPKYFKPGMPFELMVYVTNPDGSPAPRVPVKADDFQGTVSTQGN…	3082	4983	1	1	1	729.9	1457.79	2	1457.79	-0.0028	0	41.66	0.0075	K	NYLHLAVTASELK	S
1	2::tr|A0A151NL74|A0A151NL74_ALLMI	Uncharacterized protein OS=Alligator mississippiensis OX=8496 GN=Y1Q_0015779 PE=4 SV=1	3704	187765	86	86	69	69	46	1655	MEGSICYLAAVLLFCFPAVVHSQLYSLITPNVLRVESEEKVVVEANGLNAATEVTITVHDFPFKRQVLYLIKANLNPDEGMLTTATIKISSNQVKKDSRDNQYVLIQAKIKDVTLEKVVLLSFHSGYIFVQTDKTIYTPGSTVLCRIFAMGHKMEPLFKTVIVEFETPEGIIVKQSPVFSPMKTGIYSLNYNLPEIVNLGTWKVVAKFQDSPLQNFSTQFEVKEYVLPSFEVILEPSEKFLYIDDVKDFRVSITARYLYGKKLEGTAFVLFGVKMENEKRSIPQSLKRIQIQDGDGEAVLTRGMLQARFPNLQELVGHTLYISVTVLTESGSDMVEAERTGIHIVTSPYQIHFTKTPKYFKPGMPFELMVYVTNPDGSPAPRVPVKADDFQGTVSTQGN…	3083	4955	1	1	1	486.937	1457.79	3	1457.79	0.0001	0	53.05	0.00052	K	NYLHLAVTASELK	S
1	2::tr|A0A151NL74|A0A151NL74_ALLMI	Uncharacterized protein OS=Alligator mississippiensis OX=8496 GN=Y1Q_0015779 PE=4 SV=1	3704	187765	86	86	69	69	46	1655	MEGSICYLAAVLLFCFPAVVHSQLYSLITPNVLRVESEEKVVVEANGLNAATEVTITVHDFPFKRQVLYLIKANLNPDEGMLTTATIKISSNQVKKDSRDNQYVLIQAKIKDVTLEKVVLLSFHSGYIFVQTDKTIYTPGSTVLCRIFAMGHKMEPLFKTVIVEFETPEGIIVKQSPVFSPMKTGIYSLNYNLPEIVNLGTWKVVAKFQDSPLQNFSTQFEVKEYVLPSFEVILEPSEKFLYIDDVKDFRVSITARYLYGKKLEGTAFVLFGVKMENEKRSIPQSLKRIQIQDGDGEAVLTRGMLQARFPNLQELVGHTLYISVTVLTESGSDMVEAERTGIHIVTSPYQIHFTKTPKYFKPGMPFELMVYVTNPDGSPAPRVPVKADDFQGTVSTQGN…	3117	2671	1	1	1	489.225	1464.65	3	1464.66	-0.0037	0	34.81	0.028	K	VSHTEEECLSFK	A
1	2::tr|A0A151NL74|A0A151NL74_ALLMI	Uncharacterized protein OS=Alligator mississippiensis OX=8496 GN=Y1Q_0015779 PE=4 SV=1	3704	187765	86	86	69	69	46	1655	MEGSICYLAAVLLFCFPAVVHSQLYSLITPNVLRVESEEKVVVEANGLNAATEVTITVHDFPFKRQVLYLIKANLNPDEGMLTTATIKISSNQVKKDSRDNQYVLIQAKIKDVTLEKVVLLSFHSGYIFVQTDKTIYTPGSTVLCRIFAMGHKMEPLFKTVIVEFETPEGIIVKQSPVFSPMKTGIYSLNYNLPEIVNLGTWKVVAKFQDSPLQNFSTQFEVKEYVLPSFEVILEPSEKFLYIDDVKDFRVSITARYLYGKKLEGTAFVLFGVKMENEKRSIPQSLKRIQIQDGDGEAVLTRGMLQARFPNLQELVGHTLYISVTVLTESGSDMVEAERTGIHIVTSPYQIHFTKTPKYFKPGMPFELMVYVTNPDGSPAPRVPVKADDFQGTVSTQGN…	3218	4842	1	1	1	742.919	1483.82	2	1483.82	-0.002	0	89.86	6.7e-08	R	VSVQGNPVTTIIEK	S
1	2::tr|A0A151NL74|A0A151NL74_ALLMI	Uncharacterized protein OS=Alligator mississippiensis OX=8496 GN=Y1Q_0015779 PE=4 SV=1	3704	187765	86	86	69	69	46	1655	MEGSICYLAAVLLFCFPAVVHSQLYSLITPNVLRVESEEKVVVEANGLNAATEVTITVHDFPFKRQVLYLIKANLNPDEGMLTTATIKISSNQVKKDSRDNQYVLIQAKIKDVTLEKVVLLSFHSGYIFVQTDKTIYTPGSTVLCRIFAMGHKMEPLFKTVIVEFETPEGIIVKQSPVFSPMKTGIYSLNYNLPEIVNLGTWKVVAKFQDSPLQNFSTQFEVKEYVLPSFEVILEPSEKFLYIDDVKDFRVSITARYLYGKKLEGTAFVLFGVKMENEKRSIPQSLKRIQIQDGDGEAVLTRGMLQARFPNLQELVGHTLYISVTVLTESGSDMVEAERTGIHIVTSPYQIHFTKTPKYFKPGMPFELMVYVTNPDGSPAPRVPVKADDFQGTVSTQGN…	3402	4191	1	1	1	757.893	1513.77	2	1513.77	-0.0013	0	27.4	0.21	R	IQIQDGDGEAVLTR	G
1	2::tr|A0A151NL74|A0A151NL74_ALLMI	Uncharacterized protein OS=Alligator mississippiensis OX=8496 GN=Y1Q_0015779 PE=4 SV=1	3704	187765	86	86	69	69	46	1655	MEGSICYLAAVLLFCFPAVVHSQLYSLITPNVLRVESEEKVVVEANGLNAATEVTITVHDFPFKRQVLYLIKANLNPDEGMLTTATIKISSNQVKKDSRDNQYVLIQAKIKDVTLEKVVLLSFHSGYIFVQTDKTIYTPGSTVLCRIFAMGHKMEPLFKTVIVEFETPEGIIVKQSPVFSPMKTGIYSLNYNLPEIVNLGTWKVVAKFQDSPLQNFSTQFEVKEYVLPSFEVILEPSEKFLYIDDVKDFRVSITARYLYGKKLEGTAFVLFGVKMENEKRSIPQSLKRIQIQDGDGEAVLTRGMLQARFPNLQELVGHTLYISVTVLTESGSDMVEAERTGIHIVTSPYQIHFTKTPKYFKPGMPFELMVYVTNPDGSPAPRVPVKADDFQGTVSTQGN…	3675	4222	1	1	1	784.428	1566.84	2	1566.84	-0.0001	0	78.63	9.5e-07	R	LINQGYTQQLVYK	K
1	2::tr|A0A151NL74|A0A151NL74_ALLMI	Uncharacterized protein OS=Alligator mississippiensis OX=8496 GN=Y1Q_0015779 PE=4 SV=1	3704	187765	86	86	69	69	46	1655	MEGSICYLAAVLLFCFPAVVHSQLYSLITPNVLRVESEEKVVVEANGLNAATEVTITVHDFPFKRQVLYLIKANLNPDEGMLTTATIKISSNQVKKDSRDNQYVLIQAKIKDVTLEKVVLLSFHSGYIFVQTDKTIYTPGSTVLCRIFAMGHKMEPLFKTVIVEFETPEGIIVKQSPVFSPMKTGIYSLNYNLPEIVNLGTWKVVAKFQDSPLQNFSTQFEVKEYVLPSFEVILEPSEKFLYIDDVKDFRVSITARYLYGKKLEGTAFVLFGVKMENEKRSIPQSLKRIQIQDGDGEAVLTRGMLQARFPNLQELVGHTLYISVTVLTESGSDMVEAERTGIHIVTSPYQIHFTKTPKYFKPGMPFELMVYVTNPDGSPAPRVPVKADDFQGTVSTQGN…	4056	4127	1	1	1	829.368	1656.72	2	1656.73	-0.0136	0	79.71	6.7e-07	R	IEDACEPGVDYVYK	T
1	2::tr|A0A151NL74|A0A151NL74_ALLMI	Uncharacterized protein OS=Alligator mississippiensis OX=8496 GN=Y1Q_0015779 PE=4 SV=1	3704	187765	86	86	69	69	46	1655	MEGSICYLAAVLLFCFPAVVHSQLYSLITPNVLRVESEEKVVVEANGLNAATEVTITVHDFPFKRQVLYLIKANLNPDEGMLTTATIKISSNQVKKDSRDNQYVLIQAKIKDVTLEKVVLLSFHSGYIFVQTDKTIYTPGSTVLCRIFAMGHKMEPLFKTVIVEFETPEGIIVKQSPVFSPMKTGIYSLNYNLPEIVNLGTWKVVAKFQDSPLQNFSTQFEVKEYVLPSFEVILEPSEKFLYIDDVKDFRVSITARYLYGKKLEGTAFVLFGVKMENEKRSIPQSLKRIQIQDGDGEAVLTRGMLQARFPNLQELVGHTLYISVTVLTESGSDMVEAERTGIHIVTSPYQIHFTKTPKYFKPGMPFELMVYVTNPDGSPAPRVPVKADDFQGTVSTQGN…	4165	6456	1	1	1	837.471	1672.93	2	1672.93	-0.0007	0	72.41	3.5e-06	K	TVIVEFETPEGIIVK	Q
1	2::tr|A0A151NL74|A0A151NL74_ALLMI	Uncharacterized protein OS=Alligator mississippiensis OX=8496 GN=Y1Q_0015779 PE=4 SV=1	3704	187765	86	86	69	69	46	1655	MEGSICYLAAVLLFCFPAVVHSQLYSLITPNVLRVESEEKVVVEANGLNAATEVTITVHDFPFKRQVLYLIKANLNPDEGMLTTATIKISSNQVKKDSRDNQYVLIQAKIKDVTLEKVVLLSFHSGYIFVQTDKTIYTPGSTVLCRIFAMGHKMEPLFKTVIVEFETPEGIIVKQSPVFSPMKTGIYSLNYNLPEIVNLGTWKVVAKFQDSPLQNFSTQFEVKEYVLPSFEVILEPSEKFLYIDDVKDFRVSITARYLYGKKLEGTAFVLFGVKMENEKRSIPQSLKRIQIQDGDGEAVLTRGMLQARFPNLQELVGHTLYISVTVLTESGSDMVEAERTGIHIVTSPYQIHFTKTPKYFKPGMPFELMVYVTNPDGSPAPRVPVKADDFQGTVSTQGN…	4226	4877	1	1	1	844.929	1687.84	2	1687.85	-0.0009	0	96.1	3.7e-08	K	ANLNPDEGMLTTATIK	I
1	2::tr|A0A151NL74|A0A151NL74_ALLMI	Uncharacterized protein OS=Alligator mississippiensis OX=8496 GN=Y1Q_0015779 PE=4 SV=1	3704	187765	86	86	69	69	46	1655	MEGSICYLAAVLLFCFPAVVHSQLYSLITPNVLRVESEEKVVVEANGLNAATEVTITVHDFPFKRQVLYLIKANLNPDEGMLTTATIKISSNQVKKDSRDNQYVLIQAKIKDVTLEKVVLLSFHSGYIFVQTDKTIYTPGSTVLCRIFAMGHKMEPLFKTVIVEFETPEGIIVKQSPVFSPMKTGIYSLNYNLPEIVNLGTWKVVAKFQDSPLQNFSTQFEVKEYVLPSFEVILEPSEKFLYIDDVKDFRVSITARYLYGKKLEGTAFVLFGVKMENEKRSIPQSLKRIQIQDGDGEAVLTRGMLQARFPNLQELVGHTLYISVTVLTESGSDMVEAERTGIHIVTSPYQIHFTKTPKYFKPGMPFELMVYVTNPDGSPAPRVPVKADDFQGTVSTQGN…	4347	3023	1	1	1	863.889	1725.76	2	1725.76	0.0003	0	24.98	0.27	K	ADDFQGTVSTQGNGMAK	L
1	2::tr|A0A151NL74|A0A151NL74_ALLMI	Uncharacterized protein OS=Alligator mississippiensis OX=8496 GN=Y1Q_0015779 PE=4 SV=1	3704	187765	86	86	69	69	46	1655	MEGSICYLAAVLLFCFPAVVHSQLYSLITPNVLRVESEEKVVVEANGLNAATEVTITVHDFPFKRQVLYLIKANLNPDEGMLTTATIKISSNQVKKDSRDNQYVLIQAKIKDVTLEKVVLLSFHSGYIFVQTDKTIYTPGSTVLCRIFAMGHKMEPLFKTVIVEFETPEGIIVKQSPVFSPMKTGIYSLNYNLPEIVNLGTWKVVAKFQDSPLQNFSTQFEVKEYVLPSFEVILEPSEKFLYIDDVKDFRVSITARYLYGKKLEGTAFVLFGVKMENEKRSIPQSLKRIQIQDGDGEAVLTRGMLQARFPNLQELVGHTLYISVTVLTESGSDMVEAERTGIHIVTSPYQIHFTKTPKYFKPGMPFELMVYVTNPDGSPAPRVPVKADDFQGTVSTQGN…	4353	3218	1	1	1	864.38	1726.75	2	1726.75	-0.0016	0	74.23	2.3e-06	K	ADDFQGTVSTQGNGMAK	L
1	2::tr|A0A151NL74|A0A151NL74_ALLMI	Uncharacterized protein OS=Alligator mississippiensis OX=8496 GN=Y1Q_0015779 PE=4 SV=1	3704	187765	86	86	69	69	46	1655	MEGSICYLAAVLLFCFPAVVHSQLYSLITPNVLRVESEEKVVVEANGLNAATEVTITVHDFPFKRQVLYLIKANLNPDEGMLTTATIKISSNQVKKDSRDNQYVLIQAKIKDVTLEKVVLLSFHSGYIFVQTDKTIYTPGSTVLCRIFAMGHKMEPLFKTVIVEFETPEGIIVKQSPVFSPMKTGIYSLNYNLPEIVNLGTWKVVAKFQDSPLQNFSTQFEVKEYVLPSFEVILEPSEKFLYIDDVKDFRVSITARYLYGKKLEGTAFVLFGVKMENEKRSIPQSLKRIQIQDGDGEAVLTRGMLQARFPNLQELVGHTLYISVTVLTESGSDMVEAERTGIHIVTSPYQIHFTKTPKYFKPGMPFELMVYVTNPDGSPAPRVPVKADDFQGTVSTQGN…	4496	3668	1	1	1	587.626	1759.86	3	1759.86	-0.0004	0	51.9	0.00098	R	VELIHNPAFCSASTSK	Q
1	2::tr|A0A151NL74|A0A151NL74_ALLMI	Uncharacterized protein OS=Alligator mississippiensis OX=8496 GN=Y1Q_0015779 PE=4 SV=1	3704	187765	86	86	69	69	46	1655	MEGSICYLAAVLLFCFPAVVHSQLYSLITPNVLRVESEEKVVVEANGLNAATEVTITVHDFPFKRQVLYLIKANLNPDEGMLTTATIKISSNQVKKDSRDNQYVLIQAKIKDVTLEKVVLLSFHSGYIFVQTDKTIYTPGSTVLCRIFAMGHKMEPLFKTVIVEFETPEGIIVKQSPVFSPMKTGIYSLNYNLPEIVNLGTWKVVAKFQDSPLQNFSTQFEVKEYVLPSFEVILEPSEKFLYIDDVKDFRVSITARYLYGKKLEGTAFVLFGVKMENEKRSIPQSLKRIQIQDGDGEAVLTRGMLQARFPNLQELVGHTLYISVTVLTESGSDMVEAERTGIHIVTSPYQIHFTKTPKYFKPGMPFELMVYVTNPDGSPAPRVPVKADDFQGTVSTQGN…	4607	5311	1	1	1	892.894	1783.77	2	1783.77	-0.002	0	108.01	8.9e-10	R	SEVDEGFLSDDDITSR	S
1	2::tr|A0A151NL74|A0A151NL74_ALLMI	Uncharacterized protein OS=Alligator mississippiensis OX=8496 GN=Y1Q_0015779 PE=4 SV=1	3704	187765	86	86	69	69	46	1655	MEGSICYLAAVLLFCFPAVVHSQLYSLITPNVLRVESEEKVVVEANGLNAATEVTITVHDFPFKRQVLYLIKANLNPDEGMLTTATIKISSNQVKKDSRDNQYVLIQAKIKDVTLEKVVLLSFHSGYIFVQTDKTIYTPGSTVLCRIFAMGHKMEPLFKTVIVEFETPEGIIVKQSPVFSPMKTGIYSLNYNLPEIVNLGTWKVVAKFQDSPLQNFSTQFEVKEYVLPSFEVILEPSEKFLYIDDVKDFRVSITARYLYGKKLEGTAFVLFGVKMENEKRSIPQSLKRIQIQDGDGEAVLTRGMLQARFPNLQELVGHTLYISVTVLTESGSDMVEAERTGIHIVTSPYQIHFTKTPKYFKPGMPFELMVYVTNPDGSPAPRVPVKADDFQGTVSTQGN…	4687	4550	1	1	1	904.972	1807.93	2	1807.93	-0.0012	0	126.47	3.1e-11	R	AEGTGQGTLTVVTVYNAK	I
1	2::tr|A0A151NL74|A0A151NL74_ALLMI	Uncharacterized protein OS=Alligator mississippiensis OX=8496 GN=Y1Q_0015779 PE=4 SV=1	3704	187765	86	86	69	69	46	1655	MEGSICYLAAVLLFCFPAVVHSQLYSLITPNVLRVESEEKVVVEANGLNAATEVTITVHDFPFKRQVLYLIKANLNPDEGMLTTATIKISSNQVKKDSRDNQYVLIQAKIKDVTLEKVVLLSFHSGYIFVQTDKTIYTPGSTVLCRIFAMGHKMEPLFKTVIVEFETPEGIIVKQSPVFSPMKTGIYSLNYNLPEIVNLGTWKVVAKFQDSPLQNFSTQFEVKEYVLPSFEVILEPSEKFLYIDDVKDFRVSITARYLYGKKLEGTAFVLFGVKMENEKRSIPQSLKRIQIQDGDGEAVLTRGMLQARFPNLQELVGHTLYISVTVLTESGSDMVEAERTGIHIVTSPYQIHFTKTPKYFKPGMPFELMVYVTNPDGSPAPRVPVKADDFQGTVSTQGN…	4688	4568	1	1	1	603.651	1807.93	3	1807.93	0.0003	0	30.87	0.11	R	AEGTGQGTLTVVTVYNAK	I
1	2::tr|A0A151NL74|A0A151NL74_ALLMI	Uncharacterized protein OS=Alligator mississippiensis OX=8496 GN=Y1Q_0015779 PE=4 SV=1	3704	187765	86	86	69	69	46	1655	MEGSICYLAAVLLFCFPAVVHSQLYSLITPNVLRVESEEKVVVEANGLNAATEVTITVHDFPFKRQVLYLIKANLNPDEGMLTTATIKISSNQVKKDSRDNQYVLIQAKIKDVTLEKVVLLSFHSGYIFVQTDKTIYTPGSTVLCRIFAMGHKMEPLFKTVIVEFETPEGIIVKQSPVFSPMKTGIYSLNYNLPEIVNLGTWKVVAKFQDSPLQNFSTQFEVKEYVLPSFEVILEPSEKFLYIDDVKDFRVSITARYLYGKKLEGTAFVLFGVKMENEKRSIPQSLKRIQIQDGDGEAVLTRGMLQARFPNLQELVGHTLYISVTVLTESGSDMVEAERTGIHIVTSPYQIHFTKTPKYFKPGMPFELMVYVTNPDGSPAPRVPVKADDFQGTVSTQGN…	4689	4678	1	1	1	904.975	1807.94	2	1807.93	0.0039	0	29.01	0.16	R	AEGTGQGTLTVVTVYNAK	I
1	2::tr|A0A151NL74|A0A151NL74_ALLMI	Uncharacterized protein OS=Alligator mississippiensis OX=8496 GN=Y1Q_0015779 PE=4 SV=1	3704	187765	86	86	69	69	46	1655	MEGSICYLAAVLLFCFPAVVHSQLYSLITPNVLRVESEEKVVVEANGLNAATEVTITVHDFPFKRQVLYLIKANLNPDEGMLTTATIKISSNQVKKDSRDNQYVLIQAKIKDVTLEKVVLLSFHSGYIFVQTDKTIYTPGSTVLCRIFAMGHKMEPLFKTVIVEFETPEGIIVKQSPVFSPMKTGIYSLNYNLPEIVNLGTWKVVAKFQDSPLQNFSTQFEVKEYVLPSFEVILEPSEKFLYIDDVKDFRVSITARYLYGKKLEGTAFVLFGVKMENEKRSIPQSLKRIQIQDGDGEAVLTRGMLQARFPNLQELVGHTLYISVTVLTESGSDMVEAERTGIHIVTSPYQIHFTKTPKYFKPGMPFELMVYVTNPDGSPAPRVPVKADDFQGTVSTQGN…	4792	3922	1	1	1	918.38	1834.75	2	1834.75	-0.0014	0	28.57	0.03	K	WPNEEECQEPDFQK	L
1	2::tr|A0A151NL74|A0A151NL74_ALLMI	Uncharacterized protein OS=Alligator mississippiensis OX=8496 GN=Y1Q_0015779 PE=4 SV=1	3704	187765	86	86	69	69	46	1655	MEGSICYLAAVLLFCFPAVVHSQLYSLITPNVLRVESEEKVVVEANGLNAATEVTITVHDFPFKRQVLYLIKANLNPDEGMLTTATIKISSNQVKKDSRDNQYVLIQAKIKDVTLEKVVLLSFHSGYIFVQTDKTIYTPGSTVLCRIFAMGHKMEPLFKTVIVEFETPEGIIVKQSPVFSPMKTGIYSLNYNLPEIVNLGTWKVVAKFQDSPLQNFSTQFEVKEYVLPSFEVILEPSEKFLYIDDVKDFRVSITARYLYGKKLEGTAFVLFGVKMENEKRSIPQSLKRIQIQDGDGEAVLTRGMLQARFPNLQELVGHTLYISVTVLTESGSDMVEAERTGIHIVTSPYQIHFTKTPKYFKPGMPFELMVYVTNPDGSPAPRVPVKADDFQGTVSTQGN…	4820	5188	1	1	1	614.669	1840.98	3	1840.98	0.0007	0	28.33	0.13	R	TGIHIVTSPYQIHFTK	T
1	2::tr|A0A151NL74|A0A151NL74_ALLMI	Uncharacterized protein OS=Alligator mississippiensis OX=8496 GN=Y1Q_0015779 PE=4 SV=1	3704	187765	86	86	69	69	46	1655	MEGSICYLAAVLLFCFPAVVHSQLYSLITPNVLRVESEEKVVVEANGLNAATEVTITVHDFPFKRQVLYLIKANLNPDEGMLTTATIKISSNQVKKDSRDNQYVLIQAKIKDVTLEKVVLLSFHSGYIFVQTDKTIYTPGSTVLCRIFAMGHKMEPLFKTVIVEFETPEGIIVKQSPVFSPMKTGIYSLNYNLPEIVNLGTWKVVAKFQDSPLQNFSTQFEVKEYVLPSFEVILEPSEKFLYIDDVKDFRVSITARYLYGKKLEGTAFVLFGVKMENEKRSIPQSLKRIQIQDGDGEAVLTRGMLQARFPNLQELVGHTLYISVTVLTESGSDMVEAERTGIHIVTSPYQIHFTKTPKYFKPGMPFELMVYVTNPDGSPAPRVPVKADDFQGTVSTQGN…	5045	7193	1	1	1	637.03	1908.07	3	1908.07	-0.0032	0	76.39	8.2e-07	K	RPYTIALTSYALALVEK	L
1	2::tr|A0A151NL74|A0A151NL74_ALLMI	Uncharacterized protein OS=Alligator mississippiensis OX=8496 GN=Y1Q_0015779 PE=4 SV=1	3704	187765	86	86	69	69	46	1655	MEGSICYLAAVLLFCFPAVVHSQLYSLITPNVLRVESEEKVVVEANGLNAATEVTITVHDFPFKRQVLYLIKANLNPDEGMLTTATIKISSNQVKKDSRDNQYVLIQAKIKDVTLEKVVLLSFHSGYIFVQTDKTIYTPGSTVLCRIFAMGHKMEPLFKTVIVEFETPEGIIVKQSPVFSPMKTGIYSLNYNLPEIVNLGTWKVVAKFQDSPLQNFSTQFEVKEYVLPSFEVILEPSEKFLYIDDVKDFRVSITARYLYGKKLEGTAFVLFGVKMENEKRSIPQSLKRIQIQDGDGEAVLTRGMLQARFPNLQELVGHTLYISVTVLTESGSDMVEAERTGIHIVTSPYQIHFTKTPKYFKPGMPFELMVYVTNPDGSPAPRVPVKADDFQGTVSTQGN…	5175	6371	1	1	1	651.687	1952.04	3	1952.04	-0.0019	0	53.64	0.0004	K	VVLLSFHSGYIFVQTDK	T
1	2::tr|A0A151NL74|A0A151NL74_ALLMI	Uncharacterized protein OS=Alligator mississippiensis OX=8496 GN=Y1Q_0015779 PE=4 SV=1	3704	187765	86	86	69	69	46	1655	MEGSICYLAAVLLFCFPAVVHSQLYSLITPNVLRVESEEKVVVEANGLNAATEVTITVHDFPFKRQVLYLIKANLNPDEGMLTTATIKISSNQVKKDSRDNQYVLIQAKIKDVTLEKVVLLSFHSGYIFVQTDKTIYTPGSTVLCRIFAMGHKMEPLFKTVIVEFETPEGIIVKQSPVFSPMKTGIYSLNYNLPEIVNLGTWKVVAKFQDSPLQNFSTQFEVKEYVLPSFEVILEPSEKFLYIDDVKDFRVSITARYLYGKKLEGTAFVLFGVKMENEKRSIPQSLKRIQIQDGDGEAVLTRGMLQARFPNLQELVGHTLYISVTVLTESGSDMVEAERTGIHIVTSPYQIHFTKTPKYFKPGMPFELMVYVTNPDGSPAPRVPVKADDFQGTVSTQGN…	5176	6799	1	1	1	651.687	1952.04	3	1952.04	-0.0019	0	28.53	0.13	K	VVLLSFHSGYIFVQTDK	T
1	2::tr|A0A151NL74|A0A151NL74_ALLMI	Uncharacterized protein OS=Alligator mississippiensis OX=8496 GN=Y1Q_0015779 PE=4 SV=1	3704	187765	86	86	69	69	46	1655	MEGSICYLAAVLLFCFPAVVHSQLYSLITPNVLRVESEEKVVVEANGLNAATEVTITVHDFPFKRQVLYLIKANLNPDEGMLTTATIKISSNQVKKDSRDNQYVLIQAKIKDVTLEKVVLLSFHSGYIFVQTDKTIYTPGSTVLCRIFAMGHKMEPLFKTVIVEFETPEGIIVKQSPVFSPMKTGIYSLNYNLPEIVNLGTWKVVAKFQDSPLQNFSTQFEVKEYVLPSFEVILEPSEKFLYIDDVKDFRVSITARYLYGKKLEGTAFVLFGVKMENEKRSIPQSLKRIQIQDGDGEAVLTRGMLQARFPNLQELVGHTLYISVTVLTESGSDMVEAERTGIHIVTSPYQIHFTKTPKYFKPGMPFELMVYVTNPDGSPAPRVPVKADDFQGTVSTQGN…	5668	3241	1	1	1	717.684	2150.03	3	2150.03	-0.0012	1	38.23	0.027	R	VPVKADDFQGTVSTQGNGMAK	L
1	2::tr|A0A151NL74|A0A151NL74_ALLMI	Uncharacterized protein OS=Alligator mississippiensis OX=8496 GN=Y1Q_0015779 PE=4 SV=1	3704	187765	86	86	69	69	46	1655	MEGSICYLAAVLLFCFPAVVHSQLYSLITPNVLRVESEEKVVVEANGLNAATEVTITVHDFPFKRQVLYLIKANLNPDEGMLTTATIKISSNQVKKDSRDNQYVLIQAKIKDVTLEKVVLLSFHSGYIFVQTDKTIYTPGSTVLCRIFAMGHKMEPLFKTVIVEFETPEGIIVKQSPVFSPMKTGIYSLNYNLPEIVNLGTWKVVAKFQDSPLQNFSTQFEVKEYVLPSFEVILEPSEKFLYIDDVKDFRVSITARYLYGKKLEGTAFVLFGVKMENEKRSIPQSLKRIQIQDGDGEAVLTRGMLQARFPNLQELVGHTLYISVTVLTESGSDMVEAERTGIHIVTSPYQIHFTKTPKYFKPGMPFELMVYVTNPDGSPAPRVPVKADDFQGTVSTQGN…	5888	7214	1	1	1	744.062	2229.16	3	2229.16	0	0	51.92	0.00082	K	VFAMATSLVGIEHQVLCGAVK	W
1	2::tr|A0A151NL74|A0A151NL74_ALLMI	Uncharacterized protein OS=Alligator mississippiensis OX=8496 GN=Y1Q_0015779 PE=4 SV=1	3704	187765	86	86	69	69	46	1655	MEGSICYLAAVLLFCFPAVVHSQLYSLITPNVLRVESEEKVVVEANGLNAATEVTITVHDFPFKRQVLYLIKANLNPDEGMLTTATIKISSNQVKKDSRDNQYVLIQAKIKDVTLEKVVLLSFHSGYIFVQTDKTIYTPGSTVLCRIFAMGHKMEPLFKTVIVEFETPEGIIVKQSPVFSPMKTGIYSLNYNLPEIVNLGTWKVVAKFQDSPLQNFSTQFEVKEYVLPSFEVILEPSEKFLYIDDVKDFRVSITARYLYGKKLEGTAFVLFGVKMENEKRSIPQSLKRIQIQDGDGEAVLTRGMLQARFPNLQELVGHTLYISVTVLTESGSDMVEAERTGIHIVTSPYQIHFTKTPKYFKPGMPFELMVYVTNPDGSPAPRVPVKADDFQGTVSTQGN…	6541	7116	1	1	1	809.755	2426.24	3	2426.24	0.0077	0	76.01	3.4e-06	R	IVAYYQVGSSEIVADSVWVDVK	D
1	2::tr|A0A151NL74|A0A151NL74_ALLMI	Uncharacterized protein OS=Alligator mississippiensis OX=8496 GN=Y1Q_0015779 PE=4 SV=1	3704	187765	86	86	69	69	46	1655	MEGSICYLAAVLLFCFPAVVHSQLYSLITPNVLRVESEEKVVVEANGLNAATEVTITVHDFPFKRQVLYLIKANLNPDEGMLTTATIKISSNQVKKDSRDNQYVLIQAKIKDVTLEKVVLLSFHSGYIFVQTDKTIYTPGSTVLCRIFAMGHKMEPLFKTVIVEFETPEGIIVKQSPVFSPMKTGIYSLNYNLPEIVNLGTWKVVAKFQDSPLQNFSTQFEVKEYVLPSFEVILEPSEKFLYIDDVKDFRVSITARYLYGKKLEGTAFVLFGVKMENEKRSIPQSLKRIQIQDGDGEAVLTRGMLQARFPNLQELVGHTLYISVTVLTESGSDMVEAERTGIHIVTSPYQIHFTKTPKYFKPGMPFELMVYVTNPDGSPAPRVPVKADDFQGTVSTQGN…	6673	4975	1	1	1	622.555	2486.19	4	2486.19	-0.0009	0	35.41	0.05	K	QKPDGVFQEDGPVIHGEMVGGYK	G
1	2::tr|A0A151NL74|A0A151NL74_ALLMI	Uncharacterized protein OS=Alligator mississippiensis OX=8496 GN=Y1Q_0015779 PE=4 SV=1	3704	187765	86	86	69	69	46	1655	MEGSICYLAAVLLFCFPAVVHSQLYSLITPNVLRVESEEKVVVEANGLNAATEVTITVHDFPFKRQVLYLIKANLNPDEGMLTTATIKISSNQVKKDSRDNQYVLIQAKIKDVTLEKVVLLSFHSGYIFVQTDKTIYTPGSTVLCRIFAMGHKMEPLFKTVIVEFETPEGIIVKQSPVFSPMKTGIYSLNYNLPEIVNLGTWKVVAKFQDSPLQNFSTQFEVKEYVLPSFEVILEPSEKFLYIDDVKDFRVSITARYLYGKKLEGTAFVLFGVKMENEKRSIPQSLKRIQIQDGDGEAVLTRGMLQARFPNLQELVGHTLYISVTVLTESGSDMVEAERTGIHIVTSPYQIHFTKTPKYFKPGMPFELMVYVTNPDGSPAPRVPVKADDFQGTVSTQGN…	6846	7030	1	1	1	857.785	2570.33	3	2570.34	-0.0054	0	91.23	8.6e-08	K	VVVEANGLNAATEVTITVHDFPFK	R
1	2::tr|A0A151NL74|A0A151NL74_ALLMI	Uncharacterized protein OS=Alligator mississippiensis OX=8496 GN=Y1Q_0015779 PE=4 SV=1	3704	187765	86	86	69	69	46	1655	MEGSICYLAAVLLFCFPAVVHSQLYSLITPNVLRVESEEKVVVEANGLNAATEVTITVHDFPFKRQVLYLIKANLNPDEGMLTTATIKISSNQVKKDSRDNQYVLIQAKIKDVTLEKVVLLSFHSGYIFVQTDKTIYTPGSTVLCRIFAMGHKMEPLFKTVIVEFETPEGIIVKQSPVFSPMKTGIYSLNYNLPEIVNLGTWKVVAKFQDSPLQNFSTQFEVKEYVLPSFEVILEPSEKFLYIDDVKDFRVSITARYLYGKKLEGTAFVLFGVKMENEKRSIPQSLKRIQIQDGDGEAVLTRGMLQARFPNLQELVGHTLYISVTVLTESGSDMVEAERTGIHIVTSPYQIHFTKTPKYFKPGMPFELMVYVTNPDGSPAPRVPVKADDFQGTVSTQGN…	6847	6902	1	1	1	857.786	2570.34	3	2570.34	-0.0021	0	47.88	0.0018	K	VVVEANGLNAATEVTITVHDFPFK	R
1	2::tr|A0A151NL74|A0A151NL74_ALLMI	Uncharacterized protein OS=Alligator mississippiensis OX=8496 GN=Y1Q_0015779 PE=4 SV=1	3704	187765	86	86	69	69	46	1655	MEGSICYLAAVLLFCFPAVVHSQLYSLITPNVLRVESEEKVVVEANGLNAATEVTITVHDFPFKRQVLYLIKANLNPDEGMLTTATIKISSNQVKKDSRDNQYVLIQAKIKDVTLEKVVLLSFHSGYIFVQTDKTIYTPGSTVLCRIFAMGHKMEPLFKTVIVEFETPEGIIVKQSPVFSPMKTGIYSLNYNLPEIVNLGTWKVVAKFQDSPLQNFSTQFEVKEYVLPSFEVILEPSEKFLYIDDVKDFRVSITARYLYGKKLEGTAFVLFGVKMENEKRSIPQSLKRIQIQDGDGEAVLTRGMLQARFPNLQELVGHTLYISVTVLTESGSDMVEAERTGIHIVTSPYQIHFTKTPKYFKPGMPFELMVYVTNPDGSPAPRVPVKADDFQGTVSTQGN…	6849	7165	1	1	1	858.115	2571.32	3	2571.32	0.0011	0	115.4	3.6e-10	K	VVVEANGLNAATEVTITVHDFPFK	R
1	2::tr|A0A151NL74|A0A151NL74_ALLMI	Uncharacterized protein OS=Alligator mississippiensis OX=8496 GN=Y1Q_0015779 PE=4 SV=1	3704	187765	86	86	69	69	46	1655	MEGSICYLAAVLLFCFPAVVHSQLYSLITPNVLRVESEEKVVVEANGLNAATEVTITVHDFPFKRQVLYLIKANLNPDEGMLTTATIKISSNQVKKDSRDNQYVLIQAKIKDVTLEKVVLLSFHSGYIFVQTDKTIYTPGSTVLCRIFAMGHKMEPLFKTVIVEFETPEGIIVKQSPVFSPMKTGIYSLNYNLPEIVNLGTWKVVAKFQDSPLQNFSTQFEVKEYVLPSFEVILEPSEKFLYIDDVKDFRVSITARYLYGKKLEGTAFVLFGVKMENEKRSIPQSLKRIQIQDGDGEAVLTRGMLQARFPNLQELVGHTLYISVTVLTESGSDMVEAERTGIHIVTSPYQIHFTKTPKYFKPGMPFELMVYVTNPDGSPAPRVPVKADDFQGTVSTQGN…	7125	6716	1	1	1	682.863	2727.42	4	2727.42	-0.0001	1	28.37	0.14	K	VVVEANGLNAATEVTITVHDFPFKR	Q
1	2::tr|A0A151NL74|A0A151NL74_ALLMI	Uncharacterized protein OS=Alligator mississippiensis OX=8496 GN=Y1Q_0015779 PE=4 SV=1	3704	187765	86	86	69	69	46	1655	MEGSICYLAAVLLFCFPAVVHSQLYSLITPNVLRVESEEKVVVEANGLNAATEVTITVHDFPFKRQVLYLIKANLNPDEGMLTTATIKISSNQVKKDSRDNQYVLIQAKIKDVTLEKVVLLSFHSGYIFVQTDKTIYTPGSTVLCRIFAMGHKMEPLFKTVIVEFETPEGIIVKQSPVFSPMKTGIYSLNYNLPEIVNLGTWKVVAKFQDSPLQNFSTQFEVKEYVLPSFEVILEPSEKFLYIDDVKDFRVSITARYLYGKKLEGTAFVLFGVKMENEKRSIPQSLKRIQIQDGDGEAVLTRGMLQARFPNLQELVGHTLYISVTVLTESGSDMVEAERTGIHIVTSPYQIHFTKTPKYFKPGMPFELMVYVTNPDGSPAPRVPVKADDFQGTVSTQGN…	7336	6750	1	1	1	943.135	2826.38	3	2826.39	-0.0036	0	78.89	2.2e-06	K	GLGGVQVEQVTAADIEDIVPNTESETR	V
1	2::tr|A0A151NL74|A0A151NL74_ALLMI	Uncharacterized protein OS=Alligator mississippiensis OX=8496 GN=Y1Q_0015779 PE=4 SV=1	3704	187765	86	86	69	69	46	1655	MEGSICYLAAVLLFCFPAVVHSQLYSLITPNVLRVESEEKVVVEANGLNAATEVTITVHDFPFKRQVLYLIKANLNPDEGMLTTATIKISSNQVKKDSRDNQYVLIQAKIKDVTLEKVVLLSFHSGYIFVQTDKTIYTPGSTVLCRIFAMGHKMEPLFKTVIVEFETPEGIIVKQSPVFSPMKTGIYSLNYNLPEIVNLGTWKVVAKFQDSPLQNFSTQFEVKEYVLPSFEVILEPSEKFLYIDDVKDFRVSITARYLYGKKLEGTAFVLFGVKMENEKRSIPQSLKRIQIQDGDGEAVLTRGMLQARFPNLQELVGHTLYISVTVLTESGSDMVEAERTGIHIVTSPYQIHFTKTPKYFKPGMPFELMVYVTNPDGSPAPRVPVKADDFQGTVSTQGN…	7337	6775	1	1	1	1414.2	2826.38	2	2826.39	-0.0035	0	106.01	4.3e-09	K	GLGGVQVEQVTAADIEDIVPNTESETR	V
2	1::sp|cRAP054|P04264|K2C1_HUMAN	Keratin, type II cytoskeletal 1 OS=Homo sapiens GN=KRT1 PE=1 SV=6	2924	66170	81	81	42	42	57.8	644	MSRQFSSRSGYRSGGGFSSGSAGIINYQRRTTSSSTRRSGGGGGRFSSCGGGGGSFGAGGGFGSRSLVNLGGSKSISISVARGGGRGSGFGGGYGGGGFGGGGFGGGGFGGGGIGGGGFGGFGSGGGGFGGGGFGGGGYGGGYGPVCPPGGIQEVTINQSLLQPLNVEIDPEIQKVKSREREQIKSLNNQFASFIDKVRFLEQQNQVLQTKWELLQQVDTSTRTHNLEPYFESFINNLRRRVDQLKSDQSRLDSELKNMQDMVEDYRNKYEDEINKRTNAENEFVTIKKDVDGAYMTKVDLQAKLDNLQQEIDFLTALYQAELSQMQTQISETNVILSMDNNRSLDLDSIIAEVKAQYEDIAQKSKAEAESLYQSKYEELQITAGRHGDSVRNSKIEIS…	141	1490	1	1	1	402.707	803.4	2	803.403	-0.0024	0	25.79	0.19	R	SEIDNVK	K
2	1::sp|cRAP054|P04264|K2C1_HUMAN	Keratin, type II cytoskeletal 1 OS=Homo sapiens GN=KRT1 PE=1 SV=6	2924	66170	81	81	42	42	57.8	644	MSRQFSSRSGYRSGGGFSSGSAGIINYQRRTTSSSTRRSGGGGGRFSSCGGGGGSFGAGGGFGSRSLVNLGGSKSISISVARGGGRGSGFGGGYGGGGFGGGGFGGGGFGGGGIGGGGFGGFGSGGGGFGGGGFGGGGYGGGYGPVCPPGGIQEVTINQSLLQPLNVEIDPEIQKVKSREREQIKSLNNQFASFIDKVRFLEQQNQVLQTKWELLQQVDTSTRTHNLEPYFESFINNLRRRVDQLKSDQSRLDSELKNMQDMVEDYRNKYEDEINKRTNAENEFVTIKKDVDGAYMTKVDLQAKLDNLQQEIDFLTALYQAELSQMQTQISETNVILSMDNNRSLDLDSIIAEVKAQYEDIAQKSKAEAESLYQSKYEELQITAGRHGDSVRNSKIEIS…	272	3342	1	1	1	416.748	831.481	2	831.481	0.0001	0	38.57	0.0073	K	SISISVAR	G
2	1::sp|cRAP054|P04264|K2C1_HUMAN	Keratin, type II cytoskeletal 1 OS=Homo sapiens GN=KRT1 PE=1 SV=6	2924	66170	81	81	42	42	57.8	644	MSRQFSSRSGYRSGGGFSSGSAGIINYQRRTTSSSTRRSGGGGGRFSSCGGGGGSFGAGGGFGSRSLVNLGGSKSISISVARGGGRGSGFGGGYGGGGFGGGGFGGGGFGGGGIGGGGFGGFGSGGGGFGGGGFGGGGYGGGYGPVCPPGGIQEVTINQSLLQPLNVEIDPEIQKVKSREREQIKSLNNQFASFIDKVRFLEQQNQVLQTKWELLQQVDTSTRTHNLEPYFESFINNLRRRVDQLKSDQSRLDSELKNMQDMVEDYRNKYEDEINKRTNAENEFVTIKKDVDGAYMTKVDLQAKLDNLQQEIDFLTALYQAELSQMQTQISETNVILSMDNNRSLDLDSIIAEVKAQYEDIAQKSKAEAESLYQSKYEELQITAGRHGDSVRNSKIEIS…	273	3228	1	1	1	416.748	831.482	2	831.481	0.001	0	36.06	0.013	K	SISISVAR	G
2	1::sp|cRAP054|P04264|K2C1_HUMAN	Keratin, type II cytoskeletal 1 OS=Homo sapiens GN=KRT1 PE=1 SV=6	2924	66170	81	81	42	42	57.8	644	MSRQFSSRSGYRSGGGFSSGSAGIINYQRRTTSSSTRRSGGGGGRFSSCGGGGGSFGAGGGFGSRSLVNLGGSKSISISVARGGGRGSGFGGGYGGGGFGGGGFGGGGFGGGGIGGGGFGGFGSGGGGFGGGGFGGGGYGGGYGPVCPPGGIQEVTINQSLLQPLNVEIDPEIQKVKSREREQIKSLNNQFASFIDKVRFLEQQNQVLQTKWELLQQVDTSTRTHNLEPYFESFINNLRRRVDQLKSDQSRLDSELKNMQDMVEDYRNKYEDEINKRTNAENEFVTIKKDVDGAYMTKVDLQAKLDNLQQEIDFLTALYQAELSQMQTQISETNVILSMDNNRSLDLDSIIAEVKAQYEDIAQKSKAEAESLYQSKYEELQITAGRHGDSVRNSKIEIS…	438	3282	1	1	1	437.753	873.491	2	873.492	-0.0013	0	58.09	0.00019	R	SLVNLGGSK	S
2	1::sp|cRAP054|P04264|K2C1_HUMAN	Keratin, type II cytoskeletal 1 OS=Homo sapiens GN=KRT1 PE=1 SV=6	2924	66170	81	81	42	42	57.8	644	MSRQFSSRSGYRSGGGFSSGSAGIINYQRRTTSSSTRRSGGGGGRFSSCGGGGGSFGAGGGFGSRSLVNLGGSKSISISVARGGGRGSGFGGGYGGGGFGGGGFGGGGFGGGGIGGGGFGGFGSGGGGFGGGGFGGGGYGGGYGPVCPPGGIQEVTINQSLLQPLNVEIDPEIQKVKSREREQIKSLNNQFASFIDKVRFLEQQNQVLQTKWELLQQVDTSTRTHNLEPYFESFINNLRRRVDQLKSDQSRLDSELKNMQDMVEDYRNKYEDEINKRTNAENEFVTIKKDVDGAYMTKVDLQAKLDNLQQEIDFLTALYQAELSQMQTQISETNVILSMDNNRSLDLDSIIAEVKAQYEDIAQKSKAEAESLYQSKYEELQITAGRHGDSVRNSKIEIS…	799	3587	1	1	0	487.269	972.524	2	972.524	-0.0003	0	54.67	0.00045	K	IEISELNR	V
2	1::sp|cRAP054|P04264|K2C1_HUMAN	Keratin, type II cytoskeletal 1 OS=Homo sapiens GN=KRT1 PE=1 SV=6	2924	66170	81	81	42	42	57.8	644	MSRQFSSRSGYRSGGGFSSGSAGIINYQRRTTSSSTRRSGGGGGRFSSCGGGGGSFGAGGGFGSRSLVNLGGSKSISISVARGGGRGSGFGGGYGGGGFGGGGFGGGGFGGGGIGGGGFGGFGSGGGGFGGGGFGGGGYGGGYGPVCPPGGIQEVTINQSLLQPLNVEIDPEIQKVKSREREQIKSLNNQFASFIDKVRFLEQQNQVLQTKWELLQQVDTSTRTHNLEPYFESFINNLRRRVDQLKSDQSRLDSELKNMQDMVEDYRNKYEDEINKRTNAENEFVTIKKDVDGAYMTKVDLQAKLDNLQQEIDFLTALYQAELSQMQTQISETNVILSMDNNRSLDLDSIIAEVKAQYEDIAQKSKAEAESLYQSKYEELQITAGRHGDSVRNSKIEIS…	922	2699	1	1	1	500.226	998.437	2	998.438	-0.0011	0	32.83	0.016	K	DVDGAYMTK	V
2	1::sp|cRAP054|P04264|K2C1_HUMAN	Keratin, type II cytoskeletal 1 OS=Homo sapiens GN=KRT1 PE=1 SV=6	2924	66170	81	81	42	42	57.8	644	MSRQFSSRSGYRSGGGFSSGSAGIINYQRRTTSSSTRRSGGGGGRFSSCGGGGGSFGAGGGFGSRSLVNLGGSKSISISVARGGGRGSGFGGGYGGGGFGGGGFGGGGFGGGGIGGGGFGGFGSGGGGFGGGGFGGGGYGGGYGPVCPPGGIQEVTINQSLLQPLNVEIDPEIQKVKSREREQIKSLNNQFASFIDKVRFLEQQNQVLQTKWELLQQVDTSTRTHNLEPYFESFINNLRRRVDQLKSDQSRLDSELKNMQDMVEDYRNKYEDEINKRTNAENEFVTIKKDVDGAYMTKVDLQAKLDNLQQEIDFLTALYQAELSQMQTQISETNVILSMDNNRSLDLDSIIAEVKAQYEDIAQKSKAEAESLYQSKYEELQITAGRHGDSVRNSKIEIS…	998	2729	1	1	1	508.223	1014.43	2	1014.43	-0.0005	0	16.74	0.44	K	DVDGAYMTK	V
2	1::sp|cRAP054|P04264|K2C1_HUMAN	Keratin, type II cytoskeletal 1 OS=Homo sapiens GN=KRT1 PE=1 SV=6	2924	66170	81	81	42	42	57.8	644	MSRQFSSRSGYRSGGGFSSGSAGIINYQRRTTSSSTRRSGGGGGRFSSCGGGGGSFGAGGGFGSRSLVNLGGSKSISISVARGGGRGSGFGGGYGGGGFGGGGFGGGGFGGGGIGGGGFGGFGSGGGGFGGGGFGGGGYGGGYGPVCPPGGIQEVTINQSLLQPLNVEIDPEIQKVKSREREQIKSLNNQFASFIDKVRFLEQQNQVLQTKWELLQQVDTSTRTHNLEPYFESFINNLRRRVDQLKSDQSRLDSELKNMQDMVEDYRNKYEDEINKRTNAENEFVTIKKDVDGAYMTKVDLQAKLDNLQQEIDFLTALYQAELSQMQTQISETNVILSMDNNRSLDLDSIIAEVKAQYEDIAQKSKAEAESLYQSKYEELQITAGRHGDSVRNSKIEIS…	999	1737	1	1	1	508.224	1014.43	2	1014.43	-0.0002	0	40.13	0.002	K	DVDGAYMTK	V
2	1::sp|cRAP054|P04264|K2C1_HUMAN	Keratin, type II cytoskeletal 1 OS=Homo sapiens GN=KRT1 PE=1 SV=6	2924	66170	81	81	42	42	57.8	644	MSRQFSSRSGYRSGGGFSSGSAGIINYQRRTTSSSTRRSGGGGGRFSSCGGGGGSFGAGGGFGSRSLVNLGGSKSISISVARGGGRGSGFGGGYGGGGFGGGGFGGGGFGGGGIGGGGFGGFGSGGGGFGGGGFGGGGYGGGYGPVCPPGGIQEVTINQSLLQPLNVEIDPEIQKVKSREREQIKSLNNQFASFIDKVRFLEQQNQVLQTKWELLQQVDTSTRTHNLEPYFESFINNLRRRVDQLKSDQSRLDSELKNMQDMVEDYRNKYEDEINKRTNAENEFVTIKKDVDGAYMTKVDLQAKLDNLQQEIDFLTALYQAELSQMQTQISETNVILSMDNNRSLDLDSIIAEVKAQYEDIAQKSKAEAESLYQSKYEELQITAGRHGDSVRNSKIEIS…	1000	1860	1	1	1	508.224	1014.43	2	1014.43	0.0005	0	35.07	0.0065	K	DVDGAYMTK	V
2	1::sp|cRAP054|P04264|K2C1_HUMAN	Keratin, type II cytoskeletal 1 OS=Homo sapiens GN=KRT1 PE=1 SV=6	2924	66170	81	81	42	42	57.8	644	MSRQFSSRSGYRSGGGFSSGSAGIINYQRRTTSSSTRRSGGGGGRFSSCGGGGGSFGAGGGFGSRSLVNLGGSKSISISVARGGGRGSGFGGGYGGGGFGGGGFGGGGFGGGGIGGGGFGGFGSGGGGFGGGGFGGGGYGGGYGPVCPPGGIQEVTINQSLLQPLNVEIDPEIQKVKSREREQIKSLNNQFASFIDKVRFLEQQNQVLQTKWELLQQVDTSTRTHNLEPYFESFINNLRRRVDQLKSDQSRLDSELKNMQDMVEDYRNKYEDEINKRTNAENEFVTIKKDVDGAYMTKVDLQAKLDNLQQEIDFLTALYQAELSQMQTQISETNVILSMDNNRSLDLDSIIAEVKAQYEDIAQKSKAEAESLYQSKYEELQITAGRHGDSVRNSKIEIS…	1075	2751	1	1	0	517.262	1032.51	2	1032.51	-0.0001	0	56.2	0.00032	R	TLLEGEESR	M
2	1::sp|cRAP054|P04264|K2C1_HUMAN	Keratin, type II cytoskeletal 1 OS=Homo sapiens GN=KRT1 PE=1 SV=6	2924	66170	81	81	42	42	57.8	644	MSRQFSSRSGYRSGGGFSSGSAGIINYQRRTTSSSTRRSGGGGGRFSSCGGGGGSFGAGGGFGSRSLVNLGGSKSISISVARGGGRGSGFGGGYGGGGFGGGGFGGGGFGGGGIGGGGFGGFGSGGGGFGGGGFGGGGYGGGYGPVCPPGGIQEVTINQSLLQPLNVEIDPEIQKVKSREREQIKSLNNQFASFIDKVRFLEQQNQVLQTKWELLQQVDTSTRTHNLEPYFESFINNLRRRVDQLKSDQSRLDSELKNMQDMVEDYRNKYEDEINKRTNAENEFVTIKKDVDGAYMTKVDLQAKLDNLQQEIDFLTALYQAELSQMQTQISETNVILSMDNNRSLDLDSIIAEVKAQYEDIAQKSKAEAESLYQSKYEELQITAGRHGDSVRNSKIEIS…	1076	2643	1	1	0	517.262	1032.51	2	1032.51	0.0004	0	61.06	0.0001	R	TLLEGEESR	M
2	1::sp|cRAP054|P04264|K2C1_HUMAN	Keratin, type II cytoskeletal 1 OS=Homo sapiens GN=KRT1 PE=1 SV=6	2924	66170	81	81	42	42	57.8	644	MSRQFSSRSGYRSGGGFSSGSAGIINYQRRTTSSSTRRSGGGGGRFSSCGGGGGSFGAGGGFGSRSLVNLGGSKSISISVARGGGRGSGFGGGYGGGGFGGGGFGGGGFGGGGIGGGGFGGFGSGGGGFGGGGFGGGGYGGGYGPVCPPGGIQEVTINQSLLQPLNVEIDPEIQKVKSREREQIKSLNNQFASFIDKVRFLEQQNQVLQTKWELLQQVDTSTRTHNLEPYFESFINNLRRRVDQLKSDQSRLDSELKNMQDMVEDYRNKYEDEINKRTNAENEFVTIKKDVDGAYMTKVDLQAKLDNLQQEIDFLTALYQAELSQMQTQISETNVILSMDNNRSLDLDSIIAEVKAQYEDIAQKSKAEAESLYQSKYEELQITAGRHGDSVRNSKIEIS…	1077	2912	1	1	0	517.262	1032.51	2	1032.51	0.0014	0	28.54	0.18	R	TLLEGEESR	M
2	1::sp|cRAP054|P04264|K2C1_HUMAN	Keratin, type II cytoskeletal 1 OS=Homo sapiens GN=KRT1 PE=1 SV=6	2924	66170	81	81	42	42	57.8	644	MSRQFSSRSGYRSGGGFSSGSAGIINYQRRTTSSSTRRSGGGGGRFSSCGGGGGSFGAGGGFGSRSLVNLGGSKSISISVARGGGRGSGFGGGYGGGGFGGGGFGGGGFGGGGIGGGGFGGFGSGGGGFGGGGFGGGGYGGGYGPVCPPGGIQEVTINQSLLQPLNVEIDPEIQKVKSREREQIKSLNNQFASFIDKVRFLEQQNQVLQTKWELLQQVDTSTRTHNLEPYFESFINNLRRRVDQLKSDQSRLDSELKNMQDMVEDYRNKYEDEINKRTNAENEFVTIKKDVDGAYMTKVDLQAKLDNLQQEIDFLTALYQAELSQMQTQISETNVILSMDNNRSLDLDSIIAEVKAQYEDIAQKSKAEAESLYQSKYEELQITAGRHGDSVRNSKIEIS…	1200	2227	1	1	1	533.264	1064.51	2	1064.51	0	0	28.31	0.15	K	AQYEDIAQK	S
2	1::sp|cRAP054|P04264|K2C1_HUMAN	Keratin, type II cytoskeletal 1 OS=Homo sapiens GN=KRT1 PE=1 SV=6	2924	66170	81	81	42	42	57.8	644	MSRQFSSRSGYRSGGGFSSGSAGIINYQRRTTSSSTRRSGGGGGRFSSCGGGGGSFGAGGGFGSRSLVNLGGSKSISISVARGGGRGSGFGGGYGGGGFGGGGFGGGGFGGGGIGGGGFGGFGSGGGGFGGGGFGGGGYGGGYGPVCPPGGIQEVTINQSLLQPLNVEIDPEIQKVKSREREQIKSLNNQFASFIDKVRFLEQQNQVLQTKWELLQQVDTSTRTHNLEPYFESFINNLRRRVDQLKSDQSRLDSELKNMQDMVEDYRNKYEDEINKRTNAENEFVTIKKDVDGAYMTKVDLQAKLDNLQQEIDFLTALYQAELSQMQTQISETNVILSMDNNRSLDLDSIIAEVKAQYEDIAQKSKAEAESLYQSKYEELQITAGRHGDSVRNSKIEIS…	1201	2114	1	1	1	533.264	1064.51	2	1064.51	0.0003	0	43.98	0.004	K	AQYEDIAQK	S
2	1::sp|cRAP054|P04264|K2C1_HUMAN	Keratin, type II cytoskeletal 1 OS=Homo sapiens GN=KRT1 PE=1 SV=6	2924	66170	81	81	42	42	57.8	644	MSRQFSSRSGYRSGGGFSSGSAGIINYQRRTTSSSTRRSGGGGGRFSSCGGGGGSFGAGGGFGSRSLVNLGGSKSISISVARGGGRGSGFGGGYGGGGFGGGGFGGGGFGGGGIGGGGFGGFGSGGGGFGGGGFGGGGYGGGYGPVCPPGGIQEVTINQSLLQPLNVEIDPEIQKVKSREREQIKSLNNQFASFIDKVRFLEQQNQVLQTKWELLQQVDTSTRTHNLEPYFESFINNLRRRVDQLKSDQSRLDSELKNMQDMVEDYRNKYEDEINKRTNAENEFVTIKKDVDGAYMTKVDLQAKLDNLQQEIDFLTALYQAELSQMQTQISETNVILSMDNNRSLDLDSIIAEVKAQYEDIAQKSKAEAESLYQSKYEELQITAGRHGDSVRNSKIEIS…	1204	1101	1	1	0	533.762	1065.51	2	1065.51	0.0004	1	50.34	0.0008	K	YEDEINKR	T
2	1::sp|cRAP054|P04264|K2C1_HUMAN	Keratin, type II cytoskeletal 1 OS=Homo sapiens GN=KRT1 PE=1 SV=6	2924	66170	81	81	42	42	57.8	644	MSRQFSSRSGYRSGGGFSSGSAGIINYQRRTTSSSTRRSGGGGGRFSSCGGGGGSFGAGGGFGSRSLVNLGGSKSISISVARGGGRGSGFGGGYGGGGFGGGGFGGGGFGGGGIGGGGFGGFGSGGGGFGGGGFGGGGYGGGYGPVCPPGGIQEVTINQSLLQPLNVEIDPEIQKVKSREREQIKSLNNQFASFIDKVRFLEQQNQVLQTKWELLQQVDTSTRTHNLEPYFESFINNLRRRVDQLKSDQSRLDSELKNMQDMVEDYRNKYEDEINKRTNAENEFVTIKKDVDGAYMTKVDLQAKLDNLQQEIDFLTALYQAELSQMQTQISETNVILSMDNNRSLDLDSIIAEVKAQYEDIAQKSKAEAESLYQSKYEELQITAGRHGDSVRNSKIEIS…	1219	1743	1	1	1	537.301	1072.59	2	1072.59	-0.0004	1	24.8	0.39	R	LRSEIDNVK	K
2	1::sp|cRAP054|P04264|K2C1_HUMAN	Keratin, type II cytoskeletal 1 OS=Homo sapiens GN=KRT1 PE=1 SV=6	2924	66170	81	81	42	42	57.8	644	MSRQFSSRSGYRSGGGFSSGSAGIINYQRRTTSSSTRRSGGGGGRFSSCGGGGGSFGAGGGFGSRSLVNLGGSKSISISVARGGGRGSGFGGGYGGGGFGGGGFGGGGFGGGGIGGGGFGGFGSGGGGFGGGGFGGGGYGGGYGPVCPPGGIQEVTINQSLLQPLNVEIDPEIQKVKSREREQIKSLNNQFASFIDKVRFLEQQNQVLQTKWELLQQVDTSTRTHNLEPYFESFINNLRRRVDQLKSDQSRLDSELKNMQDMVEDYRNKYEDEINKRTNAENEFVTIKKDVDGAYMTKVDLQAKLDNLQQEIDFLTALYQAELSQMQTQISETNVILSMDNNRSLDLDSIIAEVKAQYEDIAQKSKAEAESLYQSKYEELQITAGRHGDSVRNSKIEIS…	1303	945	1	1	1	546.755	1091.5	2	1091.5	-0.0001	0	62.75	4.6e-05	R	GSGGGSSGGSIGGR	G
2	1::sp|cRAP054|P04264|K2C1_HUMAN	Keratin, type II cytoskeletal 1 OS=Homo sapiens GN=KRT1 PE=1 SV=6	2924	66170	81	81	42	42	57.8	644	MSRQFSSRSGYRSGGGFSSGSAGIINYQRRTTSSSTRRSGGGGGRFSSCGGGGGSFGAGGGFGSRSLVNLGGSKSISISVARGGGRGSGFGGGYGGGGFGGGGFGGGGFGGGGIGGGGFGGFGSGGGGFGGGGFGGGGYGGGYGPVCPPGGIQEVTINQSLLQPLNVEIDPEIQKVKSREREQIKSLNNQFASFIDKVRFLEQQNQVLQTKWELLQQVDTSTRTHNLEPYFESFINNLRRRVDQLKSDQSRLDSELKNMQDMVEDYRNKYEDEINKRTNAENEFVTIKKDVDGAYMTKVDLQAKLDNLQQEIDFLTALYQAELSQMQTQISETNVILSMDNNRSLDLDSIIAEVKAQYEDIAQKSKAEAESLYQSKYEELQITAGRHGDSVRNSKIEIS…	1304	837	1	1	1	546.756	1091.5	2	1091.5	0.0011	0	78.65	1.2e-06	R	GSGGGSSGGSIGGR	G
2	1::sp|cRAP054|P04264|K2C1_HUMAN	Keratin, type II cytoskeletal 1 OS=Homo sapiens GN=KRT1 PE=1 SV=6	2924	66170	81	81	42	42	57.8	644	MSRQFSSRSGYRSGGGFSSGSAGIINYQRRTTSSSTRRSGGGGGRFSSCGGGGGSFGAGGGFGSRSLVNLGGSKSISISVARGGGRGSGFGGGYGGGGFGGGGFGGGGFGGGGIGGGGFGGFGSGGGGFGGGGFGGGGYGGGYGPVCPPGGIQEVTINQSLLQPLNVEIDPEIQKVKSREREQIKSLNNQFASFIDKVRFLEQQNQVLQTKWELLQQVDTSTRTHNLEPYFESFINNLRRRVDQLKSDQSRLDSELKNMQDMVEDYRNKYEDEINKRTNAENEFVTIKKDVDGAYMTKVDLQAKLDNLQQEIDFLTALYQAELSQMQTQISETNVILSMDNNRSLDLDSIIAEVKAQYEDIAQKSKAEAESLYQSKYEELQITAGRHGDSVRNSKIEIS…	1305	735	1	1	1	546.756	1091.5	2	1091.5	0.0022	0	102.01	5.6e-09	R	GSGGGSSGGSIGGR	G
2	1::sp|cRAP054|P04264|K2C1_HUMAN	Keratin, type II cytoskeletal 1 OS=Homo sapiens GN=KRT1 PE=1 SV=6	2924	66170	81	81	42	42	57.8	644	MSRQFSSRSGYRSGGGFSSGSAGIINYQRRTTSSSTRRSGGGGGRFSSCGGGGGSFGAGGGFGSRSLVNLGGSKSISISVARGGGRGSGFGGGYGGGGFGGGGFGGGGFGGGGIGGGGFGGFGSGGGGFGGGGFGGGGYGGGYGPVCPPGGIQEVTINQSLLQPLNVEIDPEIQKVKSREREQIKSLNNQFASFIDKVRFLEQQNQVLQTKWELLQQVDTSTRTHNLEPYFESFINNLRRRVDQLKSDQSRLDSELKNMQDMVEDYRNKYEDEINKRTNAENEFVTIKKDVDGAYMTKVDLQAKLDNLQQEIDFLTALYQAELSQMQTQISETNVILSMDNNRSLDLDSIIAEVKAQYEDIAQKSKAEAESLYQSKYEELQITAGRHGDSVRNSKIEIS…	1439	2215	1	1	1	563.274	1124.53	2	1124.53	-0.0007	0	62.88	3.9e-05	K	AEAESLYQSK	Y
2	1::sp|cRAP054|P04264|K2C1_HUMAN	Keratin, type II cytoskeletal 1 OS=Homo sapiens GN=KRT1 PE=1 SV=6	2924	66170	81	81	42	42	57.8	644	MSRQFSSRSGYRSGGGFSSGSAGIINYQRRTTSSSTRRSGGGGGRFSSCGGGGGSFGAGGGFGSRSLVNLGGSKSISISVARGGGRGSGFGGGYGGGGFGGGGFGGGGFGGGGIGGGGFGGFGSGGGGFGGGGFGGGGYGGGYGPVCPPGGIQEVTINQSLLQPLNVEIDPEIQKVKSREREQIKSLNNQFASFIDKVRFLEQQNQVLQTKWELLQQVDTSTRTHNLEPYFESFINNLRRRVDQLKSDQSRLDSELKNMQDMVEDYRNKYEDEINKRTNAENEFVTIKKDVDGAYMTKVDLQAKLDNLQQEIDFLTALYQAELSQMQTQISETNVILSMDNNRSLDLDSIIAEVKAQYEDIAQKSKAEAESLYQSKYEELQITAGRHGDSVRNSKIEIS…	1446	1524	1	1	1	564.275	1126.54	2	1126.53	0.0024	1	77.36	1.2e-06	K	KDVDGAYMTK	V
2	1::sp|cRAP054|P04264|K2C1_HUMAN	Keratin, type II cytoskeletal 1 OS=Homo sapiens GN=KRT1 PE=1 SV=6	2924	66170	81	81	42	42	57.8	644	MSRQFSSRSGYRSGGGFSSGSAGIINYQRRTTSSSTRRSGGGGGRFSSCGGGGGSFGAGGGFGSRSLVNLGGSKSISISVARGGGRGSGFGGGYGGGGFGGGGFGGGGFGGGGIGGGGFGGFGSGGGGFGGGGFGGGGYGGGYGPVCPPGGIQEVTINQSLLQPLNVEIDPEIQKVKSREREQIKSLNNQFASFIDKVRFLEQQNQVLQTKWELLQQVDTSTRTHNLEPYFESFINNLRRRVDQLKSDQSRLDSELKNMQDMVEDYRNKYEDEINKRTNAENEFVTIKKDVDGAYMTKVDLQAKLDNLQQEIDFLTALYQAELSQMQTQISETNVILSMDNNRSLDLDSIIAEVKAQYEDIAQKSKAEAESLYQSKYEELQITAGRHGDSVRNSKIEIS…	1516	3844	1	1	1	571.263	1140.51	2	1140.51	-0.0007	0	52.42	0.00032	R	DYQELMNTK	L
2	1::sp|cRAP054|P04264|K2C1_HUMAN	Keratin, type II cytoskeletal 1 OS=Homo sapiens GN=KRT1 PE=1 SV=6	2924	66170	81	81	42	42	57.8	644	MSRQFSSRSGYRSGGGFSSGSAGIINYQRRTTSSSTRRSGGGGGRFSSCGGGGGSFGAGGGFGSRSLVNLGGSKSISISVARGGGRGSGFGGGYGGGGFGGGGFGGGGFGGGGIGGGGFGGFGSGGGGFGGGGFGGGGYGGGYGPVCPPGGIQEVTINQSLLQPLNVEIDPEIQKVKSREREQIKSLNNQFASFIDKVRFLEQQNQVLQTKWELLQQVDTSTRTHNLEPYFESFINNLRRRVDQLKSDQSRLDSELKNMQDMVEDYRNKYEDEINKRTNAENEFVTIKKDVDGAYMTKVDLQAKLDNLQQEIDFLTALYQAELSQMQTQISETNVILSMDNNRSLDLDSIIAEVKAQYEDIAQKSKAEAESLYQSKYEELQITAGRHGDSVRNSKIEIS…	1611	3854	1	1	1	579.259	1156.5	2	1156.51	-0.003	0	40.49	0.0036	R	DYQELMNTK	L
2	1::sp|cRAP054|P04264|K2C1_HUMAN	Keratin, type II cytoskeletal 1 OS=Homo sapiens GN=KRT1 PE=1 SV=6	2924	66170	81	81	42	42	57.8	644	MSRQFSSRSGYRSGGGFSSGSAGIINYQRRTTSSSTRRSGGGGGRFSSCGGGGGSFGAGGGFGSRSLVNLGGSKSISISVARGGGRGSGFGGGYGGGGFGGGGFGGGGFGGGGIGGGGFGGFGSGGGGFGGGGFGGGGYGGGYGPVCPPGGIQEVTINQSLLQPLNVEIDPEIQKVKSREREQIKSLNNQFASFIDKVRFLEQQNQVLQTKWELLQQVDTSTRTHNLEPYFESFINNLRRRVDQLKSDQSRLDSELKNMQDMVEDYRNKYEDEINKRTNAENEFVTIKKDVDGAYMTKVDLQAKLDNLQQEIDFLTALYQAELSQMQTQISETNVILSMDNNRSLDLDSIIAEVKAQYEDIAQKSKAEAESLYQSKYEELQITAGRHGDSVRNSKIEIS…	1707	4122	1	1	1	590.303	1178.59	2	1178.59	-0.001	0	31.63	0.077	K	YEELQITAGR	H
2	1::sp|cRAP054|P04264|K2C1_HUMAN	Keratin, type II cytoskeletal 1 OS=Homo sapiens GN=KRT1 PE=1 SV=6	2924	66170	81	81	42	42	57.8	644	MSRQFSSRSGYRSGGGFSSGSAGIINYQRRTTSSSTRRSGGGGGRFSSCGGGGGSFGAGGGFGSRSLVNLGGSKSISISVARGGGRGSGFGGGYGGGGFGGGGFGGGGFGGGGIGGGGFGGFGSGGGGFGGGGFGGGGYGGGYGPVCPPGGIQEVTINQSLLQPLNVEIDPEIQKVKSREREQIKSLNNQFASFIDKVRFLEQQNQVLQTKWELLQQVDTSTRTHNLEPYFESFINNLRRRVDQLKSDQSRLDSELKNMQDMVEDYRNKYEDEINKRTNAENEFVTIKKDVDGAYMTKVDLQAKLDNLQQEIDFLTALYQAELSQMQTQISETNVILSMDNNRSLDLDSIIAEVKAQYEDIAQKSKAEAESLYQSKYEELQITAGRHGDSVRNSKIEIS…	1708	3863	1	1	1	590.303	1178.59	2	1178.59	-0.0009	0	71.41	8.1e-06	K	YEELQITAGR	H
2	1::sp|cRAP054|P04264|K2C1_HUMAN	Keratin, type II cytoskeletal 1 OS=Homo sapiens GN=KRT1 PE=1 SV=6	2924	66170	81	81	42	42	57.8	644	MSRQFSSRSGYRSGGGFSSGSAGIINYQRRTTSSSTRRSGGGGGRFSSCGGGGGSFGAGGGFGSRSLVNLGGSKSISISVARGGGRGSGFGGGYGGGGFGGGGFGGGGFGGGGIGGGGFGGFGSGGGGFGGGGFGGGGYGGGYGPVCPPGGIQEVTINQSLLQPLNVEIDPEIQKVKSREREQIKSLNNQFASFIDKVRFLEQQNQVLQTKWELLQQVDTSTRTHNLEPYFESFINNLRRRVDQLKSDQSRLDSELKNMQDMVEDYRNKYEDEINKRTNAENEFVTIKKDVDGAYMTKVDLQAKLDNLQQEIDFLTALYQAELSQMQTQISETNVILSMDNNRSLDLDSIIAEVKAQYEDIAQKSKAEAESLYQSKYEELQITAGRHGDSVRNSKIEIS…	1709	3727	1	1	1	590.304	1178.59	2	1178.59	-0.0005	0	71.51	7.9e-06	K	YEELQITAGR	H
2	1::sp|cRAP054|P04264|K2C1_HUMAN	Keratin, type II cytoskeletal 1 OS=Homo sapiens GN=KRT1 PE=1 SV=6	2924	66170	81	81	42	42	57.8	644	MSRQFSSRSGYRSGGGFSSGSAGIINYQRRTTSSSTRRSGGGGGRFSSCGGGGGSFGAGGGFGSRSLVNLGGSKSISISVARGGGRGSGFGGGYGGGGFGGGGFGGGGFGGGGIGGGGFGGFGSGGGGFGGGGFGGGGYGGGYGPVCPPGGIQEVTINQSLLQPLNVEIDPEIQKVKSREREQIKSLNNQFASFIDKVRFLEQQNQVLQTKWELLQQVDTSTRTHNLEPYFESFINNLRRRVDQLKSDQSRLDSELKNMQDMVEDYRNKYEDEINKRTNAENEFVTIKKDVDGAYMTKVDLQAKLDNLQQEIDFLTALYQAELSQMQTQISETNVILSMDNNRSLDLDSIIAEVKAQYEDIAQKSKAEAESLYQSKYEELQITAGRHGDSVRNSKIEIS…	1710	3997	1	1	1	590.304	1178.59	2	1178.59	0	0	69.62	1.2e-05	K	YEELQITAGR	H
2	1::sp|cRAP054|P04264|K2C1_HUMAN	Keratin, type II cytoskeletal 1 OS=Homo sapiens GN=KRT1 PE=1 SV=6	2924	66170	81	81	42	42	57.8	644	MSRQFSSRSGYRSGGGFSSGSAGIINYQRRTTSSSTRRSGGGGGRFSSCGGGGGSFGAGGGFGSRSLVNLGGSKSISISVARGGGRGSGFGGGYGGGGFGGGGFGGGGFGGGGIGGGGFGGFGSGGGGFGGGGFGGGGYGGGYGPVCPPGGIQEVTINQSLLQPLNVEIDPEIQKVKSREREQIKSLNNQFASFIDKVRFLEQQNQVLQTKWELLQQVDTSTRTHNLEPYFESFINNLRRRVDQLKSDQSRLDSELKNMQDMVEDYRNKYEDEINKRTNAENEFVTIKKDVDGAYMTKVDLQAKLDNLQQEIDFLTALYQAELSQMQTQISETNVILSMDNNRSLDLDSIIAEVKAQYEDIAQKSKAEAESLYQSKYEELQITAGRHGDSVRNSKIEIS…	1793	1694	1	1	1	401.235	1200.68	3	1200.68	-0.0008	2	41.8	0.0045	R	LRSEIDNVKK	Q
2	1::sp|cRAP054|P04264|K2C1_HUMAN	Keratin, type II cytoskeletal 1 OS=Homo sapiens GN=KRT1 PE=1 SV=6	2924	66170	81	81	42	42	57.8	644	MSRQFSSRSGYRSGGGFSSGSAGIINYQRRTTSSSTRRSGGGGGRFSSCGGGGGSFGAGGGFGSRSLVNLGGSKSISISVARGGGRGSGFGGGYGGGGFGGGGFGGGGFGGGGIGGGGFGGFGSGGGGFGGGGFGGGGYGGGYGPVCPPGGIQEVTINQSLLQPLNVEIDPEIQKVKSREREQIKSLNNQFASFIDKVRFLEQQNQVLQTKWELLQQVDTSTRTHNLEPYFESFINNLRRRVDQLKSDQSRLDSELKNMQDMVEDYRNKYEDEINKRTNAENEFVTIKKDVDGAYMTKVDLQAKLDNLQQEIDFLTALYQAELSQMQTQISETNVILSMDNNRSLDLDSIIAEVKAQYEDIAQKSKAEAESLYQSKYEELQITAGRHGDSVRNSKIEIS…	1794	1583	1	1	1	401.235	1200.68	3	1200.68	-0.0007	2	42.24	0.004	R	LRSEIDNVKK	Q
2	1::sp|cRAP054|P04264|K2C1_HUMAN	Keratin, type II cytoskeletal 1 OS=Homo sapiens GN=KRT1 PE=1 SV=6	2924	66170	81	81	42	42	57.8	644	MSRQFSSRSGYRSGGGFSSGSAGIINYQRRTTSSSTRRSGGGGGRFSSCGGGGGSFGAGGGFGSRSLVNLGGSKSISISVARGGGRGSGFGGGYGGGGFGGGGFGGGGFGGGGIGGGGFGGFGSGGGGFGGGGFGGGGYGGGYGPVCPPGGIQEVTINQSLLQPLNVEIDPEIQKVKSREREQIKSLNNQFASFIDKVRFLEQQNQVLQTKWELLQQVDTSTRTHNLEPYFESFINNLRRRVDQLKSDQSRLDSELKNMQDMVEDYRNKYEDEINKRTNAENEFVTIKKDVDGAYMTKVDLQAKLDNLQQEIDFLTALYQAELSQMQTQISETNVILSMDNNRSLDLDSIIAEVKAQYEDIAQKSKAEAESLYQSKYEELQITAGRHGDSVRNSKIEIS…	2069	3904	1	1	1	633.322	1264.63	2	1264.63	-0.0005	0	75.85	3.1e-06	R	TNAENEFVTIK	K
2	1::sp|cRAP054|P04264|K2C1_HUMAN	Keratin, type II cytoskeletal 1 OS=Homo sapiens GN=KRT1 PE=1 SV=6	2924	66170	81	81	42	42	57.8	644	MSRQFSSRSGYRSGGGFSSGSAGIINYQRRTTSSSTRRSGGGGGRFSSCGGGGGSFGAGGGFGSRSLVNLGGSKSISISVARGGGRGSGFGGGYGGGGFGGGGFGGGGFGGGGIGGGGFGGFGSGGGGFGGGGFGGGGYGGGYGPVCPPGGIQEVTINQSLLQPLNVEIDPEIQKVKSREREQIKSLNNQFASFIDKVRFLEQQNQVLQTKWELLQQVDTSTRTHNLEPYFESFINNLRRRVDQLKSDQSRLDSELKNMQDMVEDYRNKYEDEINKRTNAENEFVTIKKDVDGAYMTKVDLQAKLDNLQQEIDFLTALYQAELSQMQTQISETNVILSMDNNRSLDLDSIIAEVKAQYEDIAQKSKAEAESLYQSKYEELQITAGRHGDSVRNSKIEIS…	2074	4567	1	1	1	633.814	1265.61	2	1265.61	-0.0004	0	95.55	3.2e-08	R	TNAENEFVTIK	K
2	1::sp|cRAP054|P04264|K2C1_HUMAN	Keratin, type II cytoskeletal 1 OS=Homo sapiens GN=KRT1 PE=1 SV=6	2924	66170	81	81	42	42	57.8	644	MSRQFSSRSGYRSGGGFSSGSAGIINYQRRTTSSSTRRSGGGGGRFSSCGGGGGSFGAGGGFGSRSLVNLGGSKSISISVARGGGRGSGFGGGYGGGGFGGGGFGGGGFGGGGIGGGGFGGFGSGGGGFGGGGFGGGGYGGGYGPVCPPGGIQEVTINQSLLQPLNVEIDPEIQKVKSREREQIKSLNNQFASFIDKVRFLEQQNQVLQTKWELLQQVDTSTRTHNLEPYFESFINNLRRRVDQLKSDQSRLDSELKNMQDMVEDYRNKYEDEINKRTNAENEFVTIKKDVDGAYMTKVDLQAKLDNLQQEIDFLTALYQAELSQMQTQISETNVILSMDNNRSLDLDSIIAEVKAQYEDIAQKSKAEAESLYQSKYEELQITAGRHGDSVRNSKIEIS…	2128	6291	1	1	1	639.357	1276.7	2	1276.7	-0.0029	0	65.97	2e-05	K	LALDLEIATYR	T
2	1::sp|cRAP054|P04264|K2C1_HUMAN	Keratin, type II cytoskeletal 1 OS=Homo sapiens GN=KRT1 PE=1 SV=6	2924	66170	81	81	42	42	57.8	644	MSRQFSSRSGYRSGGGFSSGSAGIINYQRRTTSSSTRRSGGGGGRFSSCGGGGGSFGAGGGFGSRSLVNLGGSKSISISVARGGGRGSGFGGGYGGGGFGGGGFGGGGFGGGGIGGGGFGGFGSGGGGFGGGGFGGGGYGGGYGPVCPPGGIQEVTINQSLLQPLNVEIDPEIQKVKSREREQIKSLNNQFASFIDKVRFLEQQNQVLQTKWELLQQVDTSTRTHNLEPYFESFINNLRRRVDQLKSDQSRLDSELKNMQDMVEDYRNKYEDEINKRTNAENEFVTIKKDVDGAYMTKVDLQAKLDNLQQEIDFLTALYQAELSQMQTQISETNVILSMDNNRSLDLDSIIAEVKAQYEDIAQKSKAEAESLYQSKYEELQITAGRHGDSVRNSKIEIS…	2129	6416	1	1	1	639.358	1276.7	2	1276.7	-0.002	0	69.19	9.5e-06	K	LALDLEIATYR	T
2	1::sp|cRAP054|P04264|K2C1_HUMAN	Keratin, type II cytoskeletal 1 OS=Homo sapiens GN=KRT1 PE=1 SV=6	2924	66170	81	81	42	42	57.8	644	MSRQFSSRSGYRSGGGFSSGSAGIINYQRRTTSSSTRRSGGGGGRFSSCGGGGGSFGAGGGFGSRSLVNLGGSKSISISVARGGGRGSGFGGGYGGGGFGGGGFGGGGFGGGGIGGGGFGGFGSGGGGFGGGGFGGGGYGGGYGPVCPPGGIQEVTINQSLLQPLNVEIDPEIQKVKSREREQIKSLNNQFASFIDKVRFLEQQNQVLQTKWELLQQVDTSTRTHNLEPYFESFINNLRRRVDQLKSDQSRLDSELKNMQDMVEDYRNKYEDEINKRTNAENEFVTIKKDVDGAYMTKVDLQAKLDNLQQEIDFLTALYQAELSQMQTQISETNVILSMDNNRSLDLDSIIAEVKAQYEDIAQKSKAEAESLYQSKYEELQITAGRHGDSVRNSKIEIS…	2130	6903	1	1	1	639.358	1276.7	2	1276.7	-0.002	0	64.37	2.9e-05	K	LALDLEIATYR	T
2	1::sp|cRAP054|P04264|K2C1_HUMAN	Keratin, type II cytoskeletal 1 OS=Homo sapiens GN=KRT1 PE=1 SV=6	2924	66170	81	81	42	42	57.8	644	MSRQFSSRSGYRSGGGFSSGSAGIINYQRRTTSSSTRRSGGGGGRFSSCGGGGGSFGAGGGFGSRSLVNLGGSKSISISVARGGGRGSGFGGGYGGGGFGGGGFGGGGFGGGGIGGGGFGGFGSGGGGFGGGGFGGGGYGGGYGPVCPPGGIQEVTINQSLLQPLNVEIDPEIQKVKSREREQIKSLNNQFASFIDKVRFLEQQNQVLQTKWELLQQVDTSTRTHNLEPYFESFINNLRRRVDQLKSDQSRLDSELKNMQDMVEDYRNKYEDEINKRTNAENEFVTIKKDVDGAYMTKVDLQAKLDNLQQEIDFLTALYQAELSQMQTQISETNVILSMDNNRSLDLDSIIAEVKAQYEDIAQKSKAEAESLYQSKYEELQITAGRHGDSVRNSKIEIS…	2243	4251	1	1	1	650.768	1299.52	2	1299.52	-0.0006	0	61.83	1.4e-05	K	NMQDMVEDYR	N
2	1::sp|cRAP054|P04264|K2C1_HUMAN	Keratin, type II cytoskeletal 1 OS=Homo sapiens GN=KRT1 PE=1 SV=6	2924	66170	81	81	42	42	57.8	644	MSRQFSSRSGYRSGGGFSSGSAGIINYQRRTTSSSTRRSGGGGGRFSSCGGGGGSFGAGGGFGSRSLVNLGGSKSISISVARGGGRGSGFGGGYGGGGFGGGGFGGGGFGGGGIGGGGFGGFGSGGGGFGGGGFGGGGYGGGYGPVCPPGGIQEVTINQSLLQPLNVEIDPEIQKVKSREREQIKSLNNQFASFIDKVRFLEQQNQVLQTKWELLQQVDTSTRTHNLEPYFESFINNLRRRVDQLKSDQSRLDSELKNMQDMVEDYRNKYEDEINKRTNAENEFVTIKKDVDGAYMTKVDLQAKLDNLQQEIDFLTALYQAELSQMQTQISETNVILSMDNNRSLDLDSIIAEVKAQYEDIAQKSKAEAESLYQSKYEELQITAGRHGDSVRNSKIEIS…	2259	6028	1	1	1	651.861	1301.71	2	1301.71	0	0	62.28	7.5e-05	R	SLDLDSIIAEVK	A
2	1::sp|cRAP054|P04264|K2C1_HUMAN	Keratin, type II cytoskeletal 1 OS=Homo sapiens GN=KRT1 PE=1 SV=6	2924	66170	81	81	42	42	57.8	644	MSRQFSSRSGYRSGGGFSSGSAGIINYQRRTTSSSTRRSGGGGGRFSSCGGGGGSFGAGGGFGSRSLVNLGGSKSISISVARGGGRGSGFGGGYGGGGFGGGGFGGGGFGGGGIGGGGFGGFGSGGGGFGGGGFGGGGYGGGYGPVCPPGGIQEVTINQSLLQPLNVEIDPEIQKVKSREREQIKSLNNQFASFIDKVRFLEQQNQVLQTKWELLQQVDTSTRTHNLEPYFESFINNLRRRVDQLKSDQSRLDSELKNMQDMVEDYRNKYEDEINKRTNAENEFVTIKKDVDGAYMTKVDLQAKLDNLQQEIDFLTALYQAELSQMQTQISETNVILSMDNNRSLDLDSIIAEVKAQYEDIAQKSKAEAESLYQSKYEELQITAGRHGDSVRNSKIEIS…	2292	1805	1	1	1	654.829	1307.64	2	1307.65	-0.0029	2	33.65	0.056	R	NKYEDEINKR	T
2	1::sp|cRAP054|P04264|K2C1_HUMAN	Keratin, type II cytoskeletal 1 OS=Homo sapiens GN=KRT1 PE=1 SV=6	2924	66170	81	81	42	42	57.8	644	MSRQFSSRSGYRSGGGFSSGSAGIINYQRRTTSSSTRRSGGGGGRFSSCGGGGGSFGAGGGFGSRSLVNLGGSKSISISVARGGGRGSGFGGGYGGGGFGGGGFGGGGFGGGGIGGGGFGGFGSGGGGFGGGGFGGGGYGGGYGPVCPPGGIQEVTINQSLLQPLNVEIDPEIQKVKSREREQIKSLNNQFASFIDKVRFLEQQNQVLQTKWELLQQVDTSTRTHNLEPYFESFINNLRRRVDQLKSDQSRLDSELKNMQDMVEDYRNKYEDEINKRTNAENEFVTIKKDVDGAYMTKVDLQAKLDNLQQEIDFLTALYQAELSQMQTQISETNVILSMDNNRSLDLDSIIAEVKAQYEDIAQKSKAEAESLYQSKYEELQITAGRHGDSVRNSKIEIS…	2294	1895	1	1	1	436.89	1307.65	3	1307.65	0.0002	2	29.33	0.16	R	NKYEDEINKR	T
2	1::sp|cRAP054|P04264|K2C1_HUMAN	Keratin, type II cytoskeletal 1 OS=Homo sapiens GN=KRT1 PE=1 SV=6	2924	66170	81	81	42	42	57.8	644	MSRQFSSRSGYRSGGGFSSGSAGIINYQRRTTSSSTRRSGGGGGRFSSCGGGGGSFGAGGGFGSRSLVNLGGSKSISISVARGGGRGSGFGGGYGGGGFGGGGFGGGGFGGGGIGGGGFGGFGSGGGGFGGGGFGGGGYGGGYGPVCPPGGIQEVTINQSLLQPLNVEIDPEIQKVKSREREQIKSLNNQFASFIDKVRFLEQQNQVLQTKWELLQQVDTSTRTHNLEPYFESFINNLRRRVDQLKSDQSRLDSELKNMQDMVEDYRNKYEDEINKRTNAENEFVTIKKDVDGAYMTKVDLQAKLDNLQQEIDFLTALYQAELSQMQTQISETNVILSMDNNRSLDLDSIIAEVKAQYEDIAQKSKAEAESLYQSKYEELQITAGRHGDSVRNSKIEIS…	2295	1787	1	1	1	436.89	1307.65	3	1307.65	0.0002	2	58.43	0.00019	R	NKYEDEINKR	T
2	1::sp|cRAP054|P04264|K2C1_HUMAN	Keratin, type II cytoskeletal 1 OS=Homo sapiens GN=KRT1 PE=1 SV=6	2924	66170	81	81	42	42	57.8	644	MSRQFSSRSGYRSGGGFSSGSAGIINYQRRTTSSSTRRSGGGGGRFSSCGGGGGSFGAGGGFGSRSLVNLGGSKSISISVARGGGRGSGFGGGYGGGGFGGGGFGGGGFGGGGIGGGGFGGFGSGGGGFGGGGFGGGGYGGGYGPVCPPGGIQEVTINQSLLQPLNVEIDPEIQKVKSREREQIKSLNNQFASFIDKVRFLEQQNQVLQTKWELLQQVDTSTRTHNLEPYFESFINNLRRRVDQLKSDQSRLDSELKNMQDMVEDYRNKYEDEINKRTNAENEFVTIKKDVDGAYMTKVDLQAKLDNLQQEIDFLTALYQAELSQMQTQISETNVILSMDNNRSLDLDSIIAEVKAQYEDIAQKSKAEAESLYQSKYEELQITAGRHGDSVRNSKIEIS…	2296	2012	1	1	1	436.89	1307.65	3	1307.65	0.0004	2	39.84	0.014	R	NKYEDEINKR	T
2	1::sp|cRAP054|P04264|K2C1_HUMAN	Keratin, type II cytoskeletal 1 OS=Homo sapiens GN=KRT1 PE=1 SV=6	2924	66170	81	81	42	42	57.8	644	MSRQFSSRSGYRSGGGFSSGSAGIINYQRRTTSSSTRRSGGGGGRFSSCGGGGGSFGAGGGFGSRSLVNLGGSKSISISVARGGGRGSGFGGGYGGGGFGGGGFGGGGFGGGGIGGGGFGGFGSGGGGFGGGGFGGGGYGGGYGPVCPPGGIQEVTINQSLLQPLNVEIDPEIQKVKSREREQIKSLNNQFASFIDKVRFLEQQNQVLQTKWELLQQVDTSTRTHNLEPYFESFINNLRRRVDQLKSDQSRLDSELKNMQDMVEDYRNKYEDEINKRTNAENEFVTIKKDVDGAYMTKVDLQAKLDNLQQEIDFLTALYQAELSQMQTQISETNVILSMDNNRSLDLDSIIAEVKAQYEDIAQKSKAEAESLYQSKYEELQITAGRHGDSVRNSKIEIS…	2326	4258	1	1	1	658.765	1315.52	2	1315.52	-0.0018	0	28.77	0.017	K	NMQDMVEDYR	N
2	1::sp|cRAP054|P04264|K2C1_HUMAN	Keratin, type II cytoskeletal 1 OS=Homo sapiens GN=KRT1 PE=1 SV=6	2924	66170	81	81	42	42	57.8	644	MSRQFSSRSGYRSGGGFSSGSAGIINYQRRTTSSSTRRSGGGGGRFSSCGGGGGSFGAGGGFGSRSLVNLGGSKSISISVARGGGRGSGFGGGYGGGGFGGGGFGGGGFGGGGIGGGGFGGFGSGGGGFGGGGFGGGGYGGGYGPVCPPGGIQEVTINQSLLQPLNVEIDPEIQKVKSREREQIKSLNNQFASFIDKVRFLEQQNQVLQTKWELLQQVDTSTRTHNLEPYFESFINNLRRRVDQLKSDQSRLDSELKNMQDMVEDYRNKYEDEINKRTNAENEFVTIKKDVDGAYMTKVDLQAKLDNLQQEIDFLTALYQAELSQMQTQISETNVILSMDNNRSLDLDSIIAEVKAQYEDIAQKSKAEAESLYQSKYEELQITAGRHGDSVRNSKIEIS…	2327	3187	1	1	1	658.765	1315.52	2	1315.52	-0.0008	0	35.23	0.0041	K	NMQDMVEDYR	N
2	1::sp|cRAP054|P04264|K2C1_HUMAN	Keratin, type II cytoskeletal 1 OS=Homo sapiens GN=KRT1 PE=1 SV=6	2924	66170	81	81	42	42	57.8	644	MSRQFSSRSGYRSGGGFSSGSAGIINYQRRTTSSSTRRSGGGGGRFSSCGGGGGSFGAGGGFGSRSLVNLGGSKSISISVARGGGRGSGFGGGYGGGGFGGGGFGGGGFGGGGIGGGGFGGFGSGGGGFGGGGFGGGGYGGGYGPVCPPGGIQEVTINQSLLQPLNVEIDPEIQKVKSREREQIKSLNNQFASFIDKVRFLEQQNQVLQTKWELLQQVDTSTRTHNLEPYFESFINNLRRRVDQLKSDQSRLDSELKNMQDMVEDYRNKYEDEINKRTNAENEFVTIKKDVDGAYMTKVDLQAKLDNLQQEIDFLTALYQAELSQMQTQISETNVILSMDNNRSLDLDSIIAEVKAQYEDIAQKSKAEAESLYQSKYEELQITAGRHGDSVRNSKIEIS…	2328	3067	1	1	1	658.766	1315.52	2	1315.52	-0.0003	0	54.58	4.9e-05	K	NMQDMVEDYR	N
2	1::sp|cRAP054|P04264|K2C1_HUMAN	Keratin, type II cytoskeletal 1 OS=Homo sapiens GN=KRT1 PE=1 SV=6	2924	66170	81	81	42	42	57.8	644	MSRQFSSRSGYRSGGGFSSGSAGIINYQRRTTSSSTRRSGGGGGRFSSCGGGGGSFGAGGGFGSRSLVNLGGSKSISISVARGGGRGSGFGGGYGGGGFGGGGFGGGGFGGGGIGGGGFGGFGSGGGGFGGGGFGGGGYGGGYGPVCPPGGIQEVTINQSLLQPLNVEIDPEIQKVKSREREQIKSLNNQFASFIDKVRFLEQQNQVLQTKWELLQQVDTSTRTHNLEPYFESFINNLRRRVDQLKSDQSRLDSELKNMQDMVEDYRNKYEDEINKRTNAENEFVTIKKDVDGAYMTKVDLQAKLDNLQQEIDFLTALYQAELSQMQTQISETNVILSMDNNRSLDLDSIIAEVKAQYEDIAQKSKAEAESLYQSKYEELQITAGRHGDSVRNSKIEIS…	2329	2910	1	1	1	658.766	1315.52	2	1315.52	-0.0001	0	44.28	0.00052	K	NMQDMVEDYR	N
2	1::sp|cRAP054|P04264|K2C1_HUMAN	Keratin, type II cytoskeletal 1 OS=Homo sapiens GN=KRT1 PE=1 SV=6	2924	66170	81	81	42	42	57.8	644	MSRQFSSRSGYRSGGGFSSGSAGIINYQRRTTSSSTRRSGGGGGRFSSCGGGGGSFGAGGGFGSRSLVNLGGSKSISISVARGGGRGSGFGGGYGGGGFGGGGFGGGGFGGGGIGGGGFGGFGSGGGGFGGGGFGGGGYGGGYGPVCPPGGIQEVTINQSLLQPLNVEIDPEIQKVKSREREQIKSLNNQFASFIDKVRFLEQQNQVLQTKWELLQQVDTSTRTHNLEPYFESFINNLRRRVDQLKSDQSRLDSELKNMQDMVEDYRNKYEDEINKRTNAENEFVTIKKDVDGAYMTKVDLQAKLDNLQQEIDFLTALYQAELSQMQTQISETNVILSMDNNRSLDLDSIIAEVKAQYEDIAQKSKAEAESLYQSKYEELQITAGRHGDSVRNSKIEIS…	2390	2167	1	1	1	666.763	1331.51	2	1331.51	-0.0013	0	60.82	6.6e-06	K	NMQDMVEDYR	N
2	1::sp|cRAP054|P04264|K2C1_HUMAN	Keratin, type II cytoskeletal 1 OS=Homo sapiens GN=KRT1 PE=1 SV=6	2924	66170	81	81	42	42	57.8	644	MSRQFSSRSGYRSGGGFSSGSAGIINYQRRTTSSSTRRSGGGGGRFSSCGGGGGSFGAGGGFGSRSLVNLGGSKSISISVARGGGRGSGFGGGYGGGGFGGGGFGGGGFGGGGIGGGGFGGFGSGGGGFGGGGFGGGGYGGGYGPVCPPGGIQEVTINQSLLQPLNVEIDPEIQKVKSREREQIKSLNNQFASFIDKVRFLEQQNQVLQTKWELLQQVDTSTRTHNLEPYFESFINNLRRRVDQLKSDQSRLDSELKNMQDMVEDYRNKYEDEINKRTNAENEFVTIKKDVDGAYMTKVDLQAKLDNLQQEIDFLTALYQAELSQMQTQISETNVILSMDNNRSLDLDSIIAEVKAQYEDIAQKSKAEAESLYQSKYEELQITAGRHGDSVRNSKIEIS…	2391	2053	1	1	1	666.763	1331.51	2	1331.51	-0.0007	0	53.54	3.5e-05	K	NMQDMVEDYR	N
2	1::sp|cRAP054|P04264|K2C1_HUMAN	Keratin, type II cytoskeletal 1 OS=Homo sapiens GN=KRT1 PE=1 SV=6	2924	66170	81	81	42	42	57.8	644	MSRQFSSRSGYRSGGGFSSGSAGIINYQRRTTSSSTRRSGGGGGRFSSCGGGGGSFGAGGGFGSRSLVNLGGSKSISISVARGGGRGSGFGGGYGGGGFGGGGFGGGGFGGGGIGGGGFGGFGSGGGGFGGGGFGGGGYGGGYGPVCPPGGIQEVTINQSLLQPLNVEIDPEIQKVKSREREQIKSLNNQFASFIDKVRFLEQQNQVLQTKWELLQQVDTSTRTHNLEPYFESFINNLRRRVDQLKSDQSRLDSELKNMQDMVEDYRNKYEDEINKRTNAENEFVTIKKDVDGAYMTKVDLQAKLDNLQQEIDFLTALYQAELSQMQTQISETNVILSMDNNRSLDLDSIIAEVKAQYEDIAQKSKAEAESLYQSKYEELQITAGRHGDSVRNSKIEIS…	2417	1682	1	1	1	447.561	1339.66	3	1339.66	-0.0003	1	46.08	0.0024	K	SKAEAESLYQSK	Y
2	1::sp|cRAP054|P04264|K2C1_HUMAN	Keratin, type II cytoskeletal 1 OS=Homo sapiens GN=KRT1 PE=1 SV=6	2924	66170	81	81	42	42	57.8	644	MSRQFSSRSGYRSGGGFSSGSAGIINYQRRTTSSSTRRSGGGGGRFSSCGGGGGSFGAGGGFGSRSLVNLGGSKSISISVARGGGRGSGFGGGYGGGGFGGGGFGGGGFGGGGIGGGGFGGFGSGGGGFGGGGFGGGGYGGGYGPVCPPGGIQEVTINQSLLQPLNVEIDPEIQKVKSREREQIKSLNNQFASFIDKVRFLEQQNQVLQTKWELLQQVDTSTRTHNLEPYFESFINNLRRRVDQLKSDQSRLDSELKNMQDMVEDYRNKYEDEINKRTNAENEFVTIKKDVDGAYMTKVDLQAKLDNLQQEIDFLTALYQAELSQMQTQISETNVILSMDNNRSLDLDSIIAEVKAQYEDIAQKSKAEAESLYQSKYEELQITAGRHGDSVRNSKIEIS…	2419	1676	1	1	1	670.841	1339.67	2	1339.66	0.0047	1	82.23	6.1e-07	K	SKAEAESLYQSK	Y
2	1::sp|cRAP054|P04264|K2C1_HUMAN	Keratin, type II cytoskeletal 1 OS=Homo sapiens GN=KRT1 PE=1 SV=6	2924	66170	81	81	42	42	57.8	644	MSRQFSSRSGYRSGGGFSSGSAGIINYQRRTTSSSTRRSGGGGGRFSSCGGGGGSFGAGGGFGSRSLVNLGGSKSISISVARGGGRGSGFGGGYGGGGFGGGGFGGGGFGGGGIGGGGFGGFGSGGGGFGGGGFGGGGYGGGYGPVCPPGGIQEVTINQSLLQPLNVEIDPEIQKVKSREREQIKSLNNQFASFIDKVRFLEQQNQVLQTKWELLQQVDTSTRTHNLEPYFESFINNLRRRVDQLKSDQSRLDSELKNMQDMVEDYRNKYEDEINKRTNAENEFVTIKKDVDGAYMTKVDLQAKLDNLQQEIDFLTALYQAELSQMQTQISETNVILSMDNNRSLDLDSIIAEVKAQYEDIAQKSKAEAESLYQSKYEELQITAGRHGDSVRNSKIEIS…	2535	4840	1	1	1	679.351	1356.69	2	1356.69	-0.0011	0	87.7	1.8e-07	K	LNDLEDALQQAK	E
2	1::sp|cRAP054|P04264|K2C1_HUMAN	Keratin, type II cytoskeletal 1 OS=Homo sapiens GN=KRT1 PE=1 SV=6	2924	66170	81	81	42	42	57.8	644	MSRQFSSRSGYRSGGGFSSGSAGIINYQRRTTSSSTRRSGGGGGRFSSCGGGGGSFGAGGGFGSRSLVNLGGSKSISISVARGGGRGSGFGGGYGGGGFGGGGFGGGGFGGGGIGGGGFGGFGSGGGGFGGGGFGGGGYGGGYGPVCPPGGIQEVTINQSLLQPLNVEIDPEIQKVKSREREQIKSLNNQFASFIDKVRFLEQQNQVLQTKWELLQQVDTSTRTHNLEPYFESFINNLRRRVDQLKSDQSRLDSELKNMQDMVEDYRNKYEDEINKRTNAENEFVTIKKDVDGAYMTKVDLQAKLDNLQQEIDFLTALYQAELSQMQTQISETNVILSMDNNRSLDLDSIIAEVKAQYEDIAQKSKAEAESLYQSKYEELQITAGRHGDSVRNSKIEIS…	2694	5641	1	1	1	692.348	1382.68	2	1382.68	-0.0013	0	86.6	2.2e-07	K	SLNNQFASFIDK	V
2	1::sp|cRAP054|P04264|K2C1_HUMAN	Keratin, type II cytoskeletal 1 OS=Homo sapiens GN=KRT1 PE=1 SV=6	2924	66170	81	81	42	42	57.8	644	MSRQFSSRSGYRSGGGFSSGSAGIINYQRRTTSSSTRRSGGGGGRFSSCGGGGGSFGAGGGFGSRSLVNLGGSKSISISVARGGGRGSGFGGGYGGGGFGGGGFGGGGFGGGGIGGGGFGGFGSGGGGFGGGGFGGGGYGGGYGPVCPPGGIQEVTINQSLLQPLNVEIDPEIQKVKSREREQIKSLNNQFASFIDKVRFLEQQNQVLQTKWELLQQVDTSTRTHNLEPYFESFINNLRRRVDQLKSDQSRLDSELKNMQDMVEDYRNKYEDEINKRTNAENEFVTIKKDVDGAYMTKVDLQAKLDNLQQEIDFLTALYQAELSQMQTQISETNVILSMDNNRSLDLDSIIAEVKAQYEDIAQKSKAEAESLYQSKYEELQITAGRHGDSVRNSKIEIS…	2704	5776	1	1	1	692.841	1383.67	2	1383.67	-0.0003	0	89.3	1.2e-07	K	SLNNQFASFIDK	V
2	1::sp|cRAP054|P04264|K2C1_HUMAN	Keratin, type II cytoskeletal 1 OS=Homo sapiens GN=KRT1 PE=1 SV=6	2924	66170	81	81	42	42	57.8	644	MSRQFSSRSGYRSGGGFSSGSAGIINYQRRTTSSSTRRSGGGGGRFSSCGGGGGSFGAGGGFGSRSLVNLGGSKSISISVARGGGRGSGFGGGYGGGGFGGGGFGGGGFGGGGIGGGGFGGFGSGGGGFGGGGFGGGGYGGGYGPVCPPGGIQEVTINQSLLQPLNVEIDPEIQKVKSREREQIKSLNNQFASFIDKVRFLEQQNQVLQTKWELLQQVDTSTRTHNLEPYFESFINNLRRRVDQLKSDQSRLDSELKNMQDMVEDYRNKYEDEINKRTNAENEFVTIKKDVDGAYMTKVDLQAKLDNLQQEIDFLTALYQAELSQMQTQISETNVILSMDNNRSLDLDSIIAEVKAQYEDIAQKSKAEAESLYQSKYEELQITAGRHGDSVRNSKIEIS…	2705	5936	1	1	1	692.841	1383.67	2	1383.67	0.0003	0	85.37	2.9e-07	K	SLNNQFASFIDK	V
2	1::sp|cRAP054|P04264|K2C1_HUMAN	Keratin, type II cytoskeletal 1 OS=Homo sapiens GN=KRT1 PE=1 SV=6	2924	66170	81	81	42	42	57.8	644	MSRQFSSRSGYRSGGGFSSGSAGIINYQRRTTSSSTRRSGGGGGRFSSCGGGGGSFGAGGGFGSRSLVNLGGSKSISISVARGGGRGSGFGGGYGGGGFGGGGFGGGGFGGGGIGGGGFGGFGSGGGGFGGGGFGGGGYGGGYGPVCPPGGIQEVTINQSLLQPLNVEIDPEIQKVKSREREQIKSLNNQFASFIDKVRFLEQQNQVLQTKWELLQQVDTSTRTHNLEPYFESFINNLRRRVDQLKSDQSRLDSELKNMQDMVEDYRNKYEDEINKRTNAENEFVTIKKDVDGAYMTKVDLQAKLDNLQQEIDFLTALYQAELSQMQTQISETNVILSMDNNRSLDLDSIIAEVKAQYEDIAQKSKAEAESLYQSKYEELQITAGRHGDSVRNSKIEIS…	2734	2758	1	1	1	697.369	1392.72	2	1392.72	-0.0017	1	60.6	8.9e-05	R	TNAENEFVTIKK	D
2	1::sp|cRAP054|P04264|K2C1_HUMAN	Keratin, type II cytoskeletal 1 OS=Homo sapiens GN=KRT1 PE=1 SV=6	2924	66170	81	81	42	42	57.8	644	MSRQFSSRSGYRSGGGFSSGSAGIINYQRRTTSSSTRRSGGGGGRFSSCGGGGGSFGAGGGFGSRSLVNLGGSKSISISVARGGGRGSGFGGGYGGGGFGGGGFGGGGFGGGGIGGGGFGGFGSGGGGFGGGGFGGGGYGGGYGPVCPPGGIQEVTINQSLLQPLNVEIDPEIQKVKSREREQIKSLNNQFASFIDKVRFLEQQNQVLQTKWELLQQVDTSTRTHNLEPYFESFINNLRRRVDQLKSDQSRLDSELKNMQDMVEDYRNKYEDEINKRTNAENEFVTIKKDVDGAYMTKVDLQAKLDNLQQEIDFLTALYQAELSQMQTQISETNVILSMDNNRSLDLDSIIAEVKAQYEDIAQKSKAEAESLYQSKYEELQITAGRHGDSVRNSKIEIS…	3163	3566	1	1	0	738.396	1474.78	2	1474.78	-0.0008	0	91.56	8.5e-08	R	FLEQQNQVLQTK	W
2	1::sp|cRAP054|P04264|K2C1_HUMAN	Keratin, type II cytoskeletal 1 OS=Homo sapiens GN=KRT1 PE=1 SV=6	2924	66170	81	81	42	42	57.8	644	MSRQFSSRSGYRSGGGFSSGSAGIINYQRRTTSSSTRRSGGGGGRFSSCGGGGGSFGAGGGFGSRSLVNLGGSKSISISVARGGGRGSGFGGGYGGGGFGGGGFGGGGFGGGGIGGGGFGGFGSGGGGFGGGGFGGGGYGGGYGPVCPPGGIQEVTINQSLLQPLNVEIDPEIQKVKSREREQIKSLNNQFASFIDKVRFLEQQNQVLQTKWELLQQVDTSTRTHNLEPYFESFINNLRRRVDQLKSDQSRLDSELKNMQDMVEDYRNKYEDEINKRTNAENEFVTIKKDVDGAYMTKVDLQAKLDNLQQEIDFLTALYQAELSQMQTQISETNVILSMDNNRSLDLDSIIAEVKAQYEDIAQKSKAEAESLYQSKYEELQITAGRHGDSVRNSKIEIS…	3164	3703	1	1	0	738.396	1474.78	2	1474.78	0.0003	0	79.63	1.3e-06	R	FLEQQNQVLQTK	W
2	1::sp|cRAP054|P04264|K2C1_HUMAN	Keratin, type II cytoskeletal 1 OS=Homo sapiens GN=KRT1 PE=1 SV=6	2924	66170	81	81	42	42	57.8	644	MSRQFSSRSGYRSGGGFSSGSAGIINYQRRTTSSSTRRSGGGGGRFSSCGGGGGSFGAGGGFGSRSLVNLGGSKSISISVARGGGRGSGFGGGYGGGGFGGGGFGGGGFGGGGIGGGGFGGFGSGGGGFGGGGFGGGGYGGGYGPVCPPGGIQEVTINQSLLQPLNVEIDPEIQKVKSREREQIKSLNNQFASFIDKVRFLEQQNQVLQTKWELLQQVDTSTRTHNLEPYFESFINNLRRRVDQLKSDQSRLDSELKNMQDMVEDYRNKYEDEINKRTNAENEFVTIKKDVDGAYMTKVDLQAKLDNLQQEIDFLTALYQAELSQMQTQISETNVILSMDNNRSLDLDSIIAEVKAQYEDIAQKSKAEAESLYQSKYEELQITAGRHGDSVRNSKIEIS…	3174	3842	1	1	0	738.89	1475.77	2	1475.76	0.0041	0	91.81	8.6e-08	R	FLEQQNQVLQTK	W
2	1::sp|cRAP054|P04264|K2C1_HUMAN	Keratin, type II cytoskeletal 1 OS=Homo sapiens GN=KRT1 PE=1 SV=6	2924	66170	81	81	42	42	57.8	644	MSRQFSSRSGYRSGGGFSSGSAGIINYQRRTTSSSTRRSGGGGGRFSSCGGGGGSFGAGGGFGSRSLVNLGGSKSISISVARGGGRGSGFGGGYGGGGFGGGGFGGGGFGGGGIGGGGFGGFGSGGGGFGGGGFGGGGYGGGYGPVCPPGGIQEVTINQSLLQPLNVEIDPEIQKVKSREREQIKSLNNQFASFIDKVRFLEQQNQVLQTKWELLQQVDTSTRTHNLEPYFESFINNLRRRVDQLKSDQSRLDSELKNMQDMVEDYRNKYEDEINKRTNAENEFVTIKKDVDGAYMTKVDLQAKLDNLQQEIDFLTALYQAELSQMQTQISETNVILSMDNNRSLDLDSIIAEVKAQYEDIAQKSKAEAESLYQSKYEELQITAGRHGDSVRNSKIEIS…	3798	5016	1	1	1	800.42	1598.83	2	1598.83	-0.0012	1	97.67	2.1e-08	K	NKLNDLEDALQQAK	E
2	1::sp|cRAP054|P04264|K2C1_HUMAN	Keratin, type II cytoskeletal 1 OS=Homo sapiens GN=KRT1 PE=1 SV=6	2924	66170	81	81	42	42	57.8	644	MSRQFSSRSGYRSGGGFSSGSAGIINYQRRTTSSSTRRSGGGGGRFSSCGGGGGSFGAGGGFGSRSLVNLGGSKSISISVARGGGRGSGFGGGYGGGGFGGGGFGGGGFGGGGIGGGGFGGFGSGGGGFGGGGFGGGGYGGGYGPVCPPGGIQEVTINQSLLQPLNVEIDPEIQKVKSREREQIKSLNNQFASFIDKVRFLEQQNQVLQTKWELLQQVDTSTRTHNLEPYFESFINNLRRRVDQLKSDQSRLDSELKNMQDMVEDYRNKYEDEINKRTNAENEFVTIKKDVDGAYMTKVDLQAKLDNLQQEIDFLTALYQAELSQMQTQISETNVILSMDNNRSLDLDSIIAEVKAQYEDIAQKSKAEAESLYQSKYEELQITAGRHGDSVRNSKIEIS…	3799	5023	1	1	1	533.95	1598.83	3	1598.83	0.0011	1	62.44	6.7e-05	K	NKLNDLEDALQQAK	E
2	1::sp|cRAP054|P04264|K2C1_HUMAN	Keratin, type II cytoskeletal 1 OS=Homo sapiens GN=KRT1 PE=1 SV=6	2924	66170	81	81	42	42	57.8	644	MSRQFSSRSGYRSGGGFSSGSAGIINYQRRTTSSSTRRSGGGGGRFSSCGGGGGSFGAGGGFGSRSLVNLGGSKSISISVARGGGRGSGFGGGYGGGGFGGGGFGGGGFGGGGIGGGGFGGFGSGGGGFGGGGFGGGGYGGGYGPVCPPGGIQEVTINQSLLQPLNVEIDPEIQKVKSREREQIKSLNNQFASFIDKVRFLEQQNQVLQTKWELLQQVDTSTRTHNLEPYFESFINNLRRRVDQLKSDQSRLDSELKNMQDMVEDYRNKYEDEINKRTNAENEFVTIKKDVDGAYMTKVDLQAKLDNLQQEIDFLTALYQAELSQMQTQISETNVILSMDNNRSLDLDSIIAEVKAQYEDIAQKSKAEAESLYQSKYEELQITAGRHGDSVRNSKIEIS…	3980	5702	1	1	1	546.958	1637.85	3	1637.85	-0.0003	1	68.67	1.5e-05	K	SLNNQFASFIDKVR	F
2	1::sp|cRAP054|P04264|K2C1_HUMAN	Keratin, type II cytoskeletal 1 OS=Homo sapiens GN=KRT1 PE=1 SV=6	2924	66170	81	81	42	42	57.8	644	MSRQFSSRSGYRSGGGFSSGSAGIINYQRRTTSSSTRRSGGGGGRFSSCGGGGGSFGAGGGFGSRSLVNLGGSKSISISVARGGGRGSGFGGGYGGGGFGGGGFGGGGFGGGGIGGGGFGGFGSGGGGFGGGGFGGGGYGGGYGPVCPPGGIQEVTINQSLLQPLNVEIDPEIQKVKSREREQIKSLNNQFASFIDKVRFLEQQNQVLQTKWELLQQVDTSTRTHNLEPYFESFINNLRRRVDQLKSDQSRLDSELKNMQDMVEDYRNKYEDEINKRTNAENEFVTIKKDVDGAYMTKVDLQAKLDNLQQEIDFLTALYQAELSQMQTQISETNVILSMDNNRSLDLDSIIAEVKAQYEDIAQKSKAEAESLYQSKYEELQITAGRHGDSVRNSKIEIS…	3983	5694	1	1	1	547.283	1638.83	3	1638.84	-0.0088	1	67.94	2.1e-05	K	SLNNQFASFIDKVR	F
2	1::sp|cRAP054|P04264|K2C1_HUMAN	Keratin, type II cytoskeletal 1 OS=Homo sapiens GN=KRT1 PE=1 SV=6	2924	66170	81	81	42	42	57.8	644	MSRQFSSRSGYRSGGGFSSGSAGIINYQRRTTSSSTRRSGGGGGRFSSCGGGGGSFGAGGGFGSRSLVNLGGSKSISISVARGGGRGSGFGGGYGGGGFGGGGFGGGGFGGGGIGGGGFGGFGSGGGGFGGGGFGGGGYGGGYGPVCPPGGIQEVTINQSLLQPLNVEIDPEIQKVKSREREQIKSLNNQFASFIDKVRFLEQQNQVLQTKWELLQQVDTSTRTHNLEPYFESFINNLRRRVDQLKSDQSRLDSELKNMQDMVEDYRNKYEDEINKRTNAENEFVTIKKDVDGAYMTKVDLQAKLDNLQQEIDFLTALYQAELSQMQTQISETNVILSMDNNRSLDLDSIIAEVKAQYEDIAQKSKAEAESLYQSKYEELQITAGRHGDSVRNSKIEIS…	3984	5730	1	1	1	820.428	1638.84	2	1638.84	0.0044	1	32.25	0.072	K	SLNNQFASFIDKVR	F
2	1::sp|cRAP054|P04264|K2C1_HUMAN	Keratin, type II cytoskeletal 1 OS=Homo sapiens GN=KRT1 PE=1 SV=6	2924	66170	81	81	42	42	57.8	644	MSRQFSSRSGYRSGGGFSSGSAGIINYQRRTTSSSTRRSGGGGGRFSSCGGGGGSFGAGGGFGSRSLVNLGGSKSISISVARGGGRGSGFGGGYGGGGFGGGGFGGGGFGGGGIGGGGFGGFGSGGGGFGGGGFGGGGYGGGYGPVCPPGGIQEVTINQSLLQPLNVEIDPEIQKVKSREREQIKSLNNQFASFIDKVRFLEQQNQVLQTKWELLQQVDTSTRTHNLEPYFESFINNLRRRVDQLKSDQSRLDSELKNMQDMVEDYRNKYEDEINKRTNAENEFVTIKKDVDGAYMTKVDLQAKLDNLQQEIDFLTALYQAELSQMQTQISETNVILSMDNNRSLDLDSIIAEVKAQYEDIAQKSKAEAESLYQSKYEELQITAGRHGDSVRNSKIEIS…	4058	4097	1	1	1	829.4	1656.78	2	1656.79	-0.0008	0	94.22	4.3e-08	R	SGGGFSSGSAGIINYQR	R
2	1::sp|cRAP054|P04264|K2C1_HUMAN	Keratin, type II cytoskeletal 1 OS=Homo sapiens GN=KRT1 PE=1 SV=6	2924	66170	81	81	42	42	57.8	644	MSRQFSSRSGYRSGGGFSSGSAGIINYQRRTTSSSTRRSGGGGGRFSSCGGGGGSFGAGGGFGSRSLVNLGGSKSISISVARGGGRGSGFGGGYGGGGFGGGGFGGGGFGGGGIGGGGFGGFGSGGGGFGGGGFGGGGYGGGYGPVCPPGGIQEVTINQSLLQPLNVEIDPEIQKVKSREREQIKSLNNQFASFIDKVRFLEQQNQVLQTKWELLQQVDTSTRTHNLEPYFESFINNLRRRVDQLKSDQSRLDSELKNMQDMVEDYRNKYEDEINKRTNAENEFVTIKKDVDGAYMTKVDLQAKLDNLQQEIDFLTALYQAELSQMQTQISETNVILSMDNNRSLDLDSIIAEVKAQYEDIAQKSKAEAESLYQSKYEELQITAGRHGDSVRNSKIEIS…	4222	4662	1	1	1	844.488	1686.96	2	1686.96	-0.002	1	96.22	7.8e-09	R	SLVNLGGSKSISISVAR	G
2	1::sp|cRAP054|P04264|K2C1_HUMAN	Keratin, type II cytoskeletal 1 OS=Homo sapiens GN=KRT1 PE=1 SV=6	2924	66170	81	81	42	42	57.8	644	MSRQFSSRSGYRSGGGFSSGSAGIINYQRRTTSSSTRRSGGGGGRFSSCGGGGGSFGAGGGFGSRSLVNLGGSKSISISVARGGGRGSGFGGGYGGGGFGGGGFGGGGFGGGGIGGGGFGGFGSGGGGFGGGGFGGGGYGGGYGPVCPPGGIQEVTINQSLLQPLNVEIDPEIQKVKSREREQIKSLNNQFASFIDKVRFLEQQNQVLQTKWELLQQVDTSTRTHNLEPYFESFINNLRRRVDQLKSDQSRLDSELKNMQDMVEDYRNKYEDEINKRTNAENEFVTIKKDVDGAYMTKVDLQAKLDNLQQEIDFLTALYQAELSQMQTQISETNVILSMDNNRSLDLDSIIAEVKAQYEDIAQKSKAEAESLYQSKYEELQITAGRHGDSVRNSKIEIS…	4223	4889	1	1	1	563.328	1686.96	3	1686.96	-0.0006	1	36.27	0.0073	R	SLVNLGGSKSISISVAR	G
2	1::sp|cRAP054|P04264|K2C1_HUMAN	Keratin, type II cytoskeletal 1 OS=Homo sapiens GN=KRT1 PE=1 SV=6	2924	66170	81	81	42	42	57.8	644	MSRQFSSRSGYRSGGGFSSGSAGIINYQRRTTSSSTRRSGGGGGRFSSCGGGGGSFGAGGGFGSRSLVNLGGSKSISISVARGGGRGSGFGGGYGGGGFGGGGFGGGGFGGGGIGGGGFGGFGSGGGGFGGGGFGGGGYGGGYGPVCPPGGIQEVTINQSLLQPLNVEIDPEIQKVKSREREQIKSLNNQFASFIDKVRFLEQQNQVLQTKWELLQQVDTSTRTHNLEPYFESFINNLRRRVDQLKSDQSRLDSELKNMQDMVEDYRNKYEDEINKRTNAENEFVTIKKDVDGAYMTKVDLQAKLDNLQQEIDFLTALYQAELSQMQTQISETNVILSMDNNRSLDLDSIIAEVKAQYEDIAQKSKAEAESLYQSKYEELQITAGRHGDSVRNSKIEIS…	4306	4024	1	1	1	858.929	1715.84	2	1715.84	-0.0012	0	84.7	5e-07	K	QISNLQQSISDAEQR	G
2	1::sp|cRAP054|P04264|K2C1_HUMAN	Keratin, type II cytoskeletal 1 OS=Homo sapiens GN=KRT1 PE=1 SV=6	2924	66170	81	81	42	42	57.8	644	MSRQFSSRSGYRSGGGFSSGSAGIINYQRRTTSSSTRRSGGGGGRFSSCGGGGGSFGAGGGFGSRSLVNLGGSKSISISVARGGGRGSGFGGGYGGGGFGGGGFGGGGFGGGGIGGGGFGGFGSGGGGFGGGGFGGGGYGGGYGPVCPPGGIQEVTINQSLLQPLNVEIDPEIQKVKSREREQIKSLNNQFASFIDKVRFLEQQNQVLQTKWELLQQVDTSTRTHNLEPYFESFINNLRRRVDQLKSDQSRLDSELKNMQDMVEDYRNKYEDEINKRTNAENEFVTIKKDVDGAYMTKVDLQAKLDNLQQEIDFLTALYQAELSQMQTQISETNVILSMDNNRSLDLDSIIAEVKAQYEDIAQKSKAEAESLYQSKYEELQITAGRHGDSVRNSKIEIS…	4307	4025	1	1	1	572.955	1715.84	3	1715.84	-0.0009	0	58.54	0.00021	K	QISNLQQSISDAEQR	G
2	1::sp|cRAP054|P04264|K2C1_HUMAN	Keratin, type II cytoskeletal 1 OS=Homo sapiens GN=KRT1 PE=1 SV=6	2924	66170	81	81	42	42	57.8	644	MSRQFSSRSGYRSGGGFSSGSAGIINYQRRTTSSSTRRSGGGGGRFSSCGGGGGSFGAGGGFGSRSLVNLGGSKSISISVARGGGRGSGFGGGYGGGGFGGGGFGGGGFGGGGIGGGGFGGFGSGGGGFGGGGFGGGGYGGGYGPVCPPGGIQEVTINQSLLQPLNVEIDPEIQKVKSREREQIKSLNNQFASFIDKVRFLEQQNQVLQTKWELLQQVDTSTRTHNLEPYFESFINNLRRRVDQLKSDQSRLDSELKNMQDMVEDYRNKYEDEINKRTNAENEFVTIKKDVDGAYMTKVDLQAKLDNLQQEIDFLTALYQAELSQMQTQISETNVILSMDNNRSLDLDSIIAEVKAQYEDIAQKSKAEAESLYQSKYEELQITAGRHGDSVRNSKIEIS…	4458	1104	1	1	1	584.614	1750.82	3	1750.82	-0.0009	1	27.13	0.26	R	GSGGGSSGGSIGGRGSSSGGVK	S
2	1::sp|cRAP054|P04264|K2C1_HUMAN	Keratin, type II cytoskeletal 1 OS=Homo sapiens GN=KRT1 PE=1 SV=6	2924	66170	81	81	42	42	57.8	644	MSRQFSSRSGYRSGGGFSSGSAGIINYQRRTTSSSTRRSGGGGGRFSSCGGGGGSFGAGGGFGSRSLVNLGGSKSISISVARGGGRGSGFGGGYGGGGFGGGGFGGGGFGGGGIGGGGFGGFGSGGGGFGGGGFGGGGYGGGYGPVCPPGGIQEVTINQSLLQPLNVEIDPEIQKVKSREREQIKSLNNQFASFIDKVRFLEQQNQVLQTKWELLQQVDTSTRTHNLEPYFESFINNLRRRVDQLKSDQSRLDSELKNMQDMVEDYRNKYEDEINKRTNAENEFVTIKKDVDGAYMTKVDLQAKLDNLQQEIDFLTALYQAELSQMQTQISETNVILSMDNNRSLDLDSIIAEVKAQYEDIAQKSKAEAESLYQSKYEELQITAGRHGDSVRNSKIEIS…	4513	3909	1	1	1	883.37	1764.73	2	1764.73	-0.0019	0	144.5	9.3e-14	R	FSSCGGGGGSFGAGGGFGSR	S
2	1::sp|cRAP054|P04264|K2C1_HUMAN	Keratin, type II cytoskeletal 1 OS=Homo sapiens GN=KRT1 PE=1 SV=6	2924	66170	81	81	42	42	57.8	644	MSRQFSSRSGYRSGGGFSSGSAGIINYQRRTTSSSTRRSGGGGGRFSSCGGGGGSFGAGGGFGSRSLVNLGGSKSISISVARGGGRGSGFGGGYGGGGFGGGGFGGGGFGGGGIGGGGFGGFGSGGGGFGGGGFGGGGYGGGYGPVCPPGGIQEVTINQSLLQPLNVEIDPEIQKVKSREREQIKSLNNQFASFIDKVRFLEQQNQVLQTKWELLQQVDTSTRTHNLEPYFESFINNLRRRVDQLKSDQSRLDSELKNMQDMVEDYRNKYEDEINKRTNAENEFVTIKKDVDGAYMTKVDLQAKLDNLQQEIDFLTALYQAELSQMQTQISETNVILSMDNNRSLDLDSIIAEVKAQYEDIAQKSKAEAESLYQSKYEELQITAGRHGDSVRNSKIEIS…	4514	4043	1	1	1	883.372	1764.73	2	1764.73	0.002	0	29.5	0.031	R	FSSCGGGGGSFGAGGGFGSR	S
2	1::sp|cRAP054|P04264|K2C1_HUMAN	Keratin, type II cytoskeletal 1 OS=Homo sapiens GN=KRT1 PE=1 SV=6	2924	66170	81	81	42	42	57.8	644	MSRQFSSRSGYRSGGGFSSGSAGIINYQRRTTSSSTRRSGGGGGRFSSCGGGGGSFGAGGGFGSRSLVNLGGSKSISISVARGGGRGSGFGGGYGGGGFGGGGFGGGGFGGGGIGGGGFGGFGSGGGGFGGGGFGGGGYGGGYGPVCPPGGIQEVTINQSLLQPLNVEIDPEIQKVKSREREQIKSLNNQFASFIDKVRFLEQQNQVLQTKWELLQQVDTSTRTHNLEPYFESFINNLRRRVDQLKSDQSRLDSELKNMQDMVEDYRNKYEDEINKRTNAENEFVTIKKDVDGAYMTKVDLQAKLDNLQQEIDFLTALYQAELSQMQTQISETNVILSMDNNRSLDLDSIIAEVKAQYEDIAQKSKAEAESLYQSKYEELQITAGRHGDSVRNSKIEIS…	5151	6309	1	1	1	648.001	1940.98	3	1940.98	0.0006	1	68.68	1.8e-05	K	LNDLEDALQQAKEDLAR	L
2	1::sp|cRAP054|P04264|K2C1_HUMAN	Keratin, type II cytoskeletal 1 OS=Homo sapiens GN=KRT1 PE=1 SV=6	2924	66170	81	81	42	42	57.8	644	MSRQFSSRSGYRSGGGFSSGSAGIINYQRRTTSSSTRRSGGGGGRFSSCGGGGGSFGAGGGFGSRSLVNLGGSKSISISVARGGGRGSGFGGGYGGGGFGGGGFGGGGFGGGGIGGGGFGGFGSGGGGFGGGGFGGGGYGGGYGPVCPPGGIQEVTINQSLLQPLNVEIDPEIQKVKSREREQIKSLNNQFASFIDKVRFLEQQNQVLQTKWELLQQVDTSTRTHNLEPYFESFINNLRRRVDQLKSDQSRLDSELKNMQDMVEDYRNKYEDEINKRTNAENEFVTIKKDVDGAYMTKVDLQAKLDNLQQEIDFLTALYQAELSQMQTQISETNVILSMDNNRSLDLDSIIAEVKAQYEDIAQKSKAEAESLYQSKYEELQITAGRHGDSVRNSKIEIS…	5269	7158	1	1	1	665.33	1992.97	3	1992.97	-0.0024	0	58.23	0.00026	R	THNLEPYFESFINNLR	R
2	1::sp|cRAP054|P04264|K2C1_HUMAN	Keratin, type II cytoskeletal 1 OS=Homo sapiens GN=KRT1 PE=1 SV=6	2924	66170	81	81	42	42	57.8	644	MSRQFSSRSGYRSGGGFSSGSAGIINYQRRTTSSSTRRSGGGGGRFSSCGGGGGSFGAGGGFGSRSLVNLGGSKSISISVARGGGRGSGFGGGYGGGGFGGGGFGGGGFGGGGIGGGGFGGFGSGGGGFGGGGFGGGGYGGGYGPVCPPGGIQEVTINQSLLQPLNVEIDPEIQKVKSREREQIKSLNNQFASFIDKVRFLEQQNQVLQTKWELLQQVDTSTRTHNLEPYFESFINNLRRRVDQLKSDQSRLDSELKNMQDMVEDYRNKYEDEINKRTNAENEFVTIKKDVDGAYMTKVDLQAKLDNLQQEIDFLTALYQAELSQMQTQISETNVILSMDNNRSLDLDSIIAEVKAQYEDIAQKSKAEAESLYQSKYEELQITAGRHGDSVRNSKIEIS…	5271	6343	1	1	1	665.658	1993.95	3	1993.95	-0.0022	0	70.27	1.5e-05	R	THNLEPYFESFINNLR	R
2	1::sp|cRAP054|P04264|K2C1_HUMAN	Keratin, type II cytoskeletal 1 OS=Homo sapiens GN=KRT1 PE=1 SV=6	2924	66170	81	81	42	42	57.8	644	MSRQFSSRSGYRSGGGFSSGSAGIINYQRRTTSSSTRRSGGGGGRFSSCGGGGGSFGAGGGFGSRSLVNLGGSKSISISVARGGGRGSGFGGGYGGGGFGGGGFGGGGFGGGGIGGGGFGGFGSGGGGFGGGGFGGGGYGGGYGPVCPPGGIQEVTINQSLLQPLNVEIDPEIQKVKSREREQIKSLNNQFASFIDKVRFLEQQNQVLQTKWELLQQVDTSTRTHNLEPYFESFINNLRRRVDQLKSDQSRLDSELKNMQDMVEDYRNKYEDEINKRTNAENEFVTIKKDVDGAYMTKVDLQAKLDNLQQEIDFLTALYQAELSQMQTQISETNVILSMDNNRSLDLDSIIAEVKAQYEDIAQKSKAEAESLYQSKYEELQITAGRHGDSVRNSKIEIS…	5351	2933	1	1	1	673.3	2016.88	3	2016.88	0.0007	1	34.14	0.024	R	LDSELKNMQDMVEDYR	N
2	1::sp|cRAP054|P04264|K2C1_HUMAN	Keratin, type II cytoskeletal 1 OS=Homo sapiens GN=KRT1 PE=1 SV=6	2924	66170	81	81	42	42	57.8	644	MSRQFSSRSGYRSGGGFSSGSAGIINYQRRTTSSSTRRSGGGGGRFSSCGGGGGSFGAGGGFGSRSLVNLGGSKSISISVARGGGRGSGFGGGYGGGGFGGGGFGGGGFGGGGIGGGGFGGFGSGGGGFGGGGFGGGGYGGGYGPVCPPGGIQEVTINQSLLQPLNVEIDPEIQKVKSREREQIKSLNNQFASFIDKVRFLEQQNQVLQTKWELLQQVDTSTRTHNLEPYFESFINNLRRRVDQLKSDQSRLDSELKNMQDMVEDYRNKYEDEINKRTNAENEFVTIKKDVDGAYMTKVDLQAKLDNLQQEIDFLTALYQAELSQMQTQISETNVILSMDNNRSLDLDSIIAEVKAQYEDIAQKSKAEAESLYQSKYEELQITAGRHGDSVRNSKIEIS…	5512	1438	1	1	1	693.976	2078.91	3	2078.91	-0.0003	1	52.22	0.00042	R	GGSGGGGGGSSGGRGSGGGSSGGSIGGR	G
2	1::sp|cRAP054|P04264|K2C1_HUMAN	Keratin, type II cytoskeletal 1 OS=Homo sapiens GN=KRT1 PE=1 SV=6	2924	66170	81	81	42	42	57.8	644	MSRQFSSRSGYRSGGGFSSGSAGIINYQRRTTSSSTRRSGGGGGRFSSCGGGGGSFGAGGGFGSRSLVNLGGSKSISISVARGGGRGSGFGGGYGGGGFGGGGFGGGGFGGGGIGGGGFGGFGSGGGGFGGGGFGGGGYGGGYGPVCPPGGIQEVTINQSLLQPLNVEIDPEIQKVKSREREQIKSLNNQFASFIDKVRFLEQQNQVLQTKWELLQQVDTSTRTHNLEPYFESFINNLRRRVDQLKSDQSRLDSELKNMQDMVEDYRNKYEDEINKRTNAENEFVTIKKDVDGAYMTKVDLQAKLDNLQQEIDFLTALYQAELSQMQTQISETNVILSMDNNRSLDLDSIIAEVKAQYEDIAQKSKAEAESLYQSKYEELQITAGRHGDSVRNSKIEIS…	5757	6440	1	1	1	728.713	2183.12	3	2183.12	-0.0006	2	66.3	3.3e-05	K	NKLNDLEDALQQAKEDLAR	L
2	1::sp|cRAP054|P04264|K2C1_HUMAN	Keratin, type II cytoskeletal 1 OS=Homo sapiens GN=KRT1 PE=1 SV=6	2924	66170	81	81	42	42	57.8	644	MSRQFSSRSGYRSGGGFSSGSAGIINYQRRTTSSSTRRSGGGGGRFSSCGGGGGSFGAGGGFGSRSLVNLGGSKSISISVARGGGRGSGFGGGYGGGGFGGGGFGGGGFGGGGIGGGGFGGFGSGGGGFGGGGFGGGGYGGGYGPVCPPGGIQEVTINQSLLQPLNVEIDPEIQKVKSREREQIKSLNNQFASFIDKVRFLEQQNQVLQTKWELLQQVDTSTRTHNLEPYFESFINNLRRRVDQLKSDQSRLDSELKNMQDMVEDYRNKYEDEINKRTNAENEFVTIKKDVDGAYMTKVDLQAKLDNLQQEIDFLTALYQAELSQMQTQISETNVILSMDNNRSLDLDSIIAEVKAQYEDIAQKSKAEAESLYQSKYEELQITAGRHGDSVRNSKIEIS…	6073	4469	1	1	1	762.713	2285.12	3	2285.12	-0.0012	1	74.07	6.6e-06	K	AEAESLYQSKYEELQITAGR	H
2	1::sp|cRAP054|P04264|K2C1_HUMAN	Keratin, type II cytoskeletal 1 OS=Homo sapiens GN=KRT1 PE=1 SV=6	2924	66170	81	81	42	42	57.8	644	MSRQFSSRSGYRSGGGFSSGSAGIINYQRRTTSSSTRRSGGGGGRFSSCGGGGGSFGAGGGFGSRSLVNLGGSKSISISVARGGGRGSGFGGGYGGGGFGGGGFGGGGFGGGGIGGGGFGGFGSGGGGFGGGGFGGGGYGGGYGPVCPPGGIQEVTINQSLLQPLNVEIDPEIQKVKSREREQIKSLNNQFASFIDKVRFLEQQNQVLQTKWELLQQVDTSTRTHNLEPYFESFINNLRRRVDQLKSDQSRLDSELKNMQDMVEDYRNKYEDEINKRTNAENEFVTIKKDVDGAYMTKVDLQAKLDNLQQEIDFLTALYQAELSQMQTQISETNVILSMDNNRSLDLDSIIAEVKAQYEDIAQKSKAEAESLYQSKYEELQITAGRHGDSVRNSKIEIS…	6411	2353	1	1	1	1192.48	2382.94	2	2382.94	-0.0024	0	191.03	1.1e-18	R	GGGGGGYGSGGSSYGSGGGSYGSGGGGGGGR	G
2	1::sp|cRAP054|P04264|K2C1_HUMAN	Keratin, type II cytoskeletal 1 OS=Homo sapiens GN=KRT1 PE=1 SV=6	2924	66170	81	81	42	42	57.8	644	MSRQFSSRSGYRSGGGFSSGSAGIINYQRRTTSSSTRRSGGGGGRFSSCGGGGGSFGAGGGFGSRSLVNLGGSKSISISVARGGGRGSGFGGGYGGGGFGGGGFGGGGFGGGGIGGGGFGGFGSGGGGFGGGGFGGGGYGGGYGPVCPPGGIQEVTINQSLLQPLNVEIDPEIQKVKSREREQIKSLNNQFASFIDKVRFLEQQNQVLQTKWELLQQVDTSTRTHNLEPYFESFINNLRRRVDQLKSDQSRLDSELKNMQDMVEDYRNKYEDEINKRTNAENEFVTIKKDVDGAYMTKVDLQAKLDNLQQEIDFLTALYQAELSQMQTQISETNVILSMDNNRSLDLDSIIAEVKAQYEDIAQKSKAEAESLYQSKYEELQITAGRHGDSVRNSKIEIS…	6695	4334	1	1	1	626.068	2500.24	4	2500.24	-0.0033	2	65.45	4.8e-05	K	SKAEAESLYQSKYEELQITAGR	H
2	1::sp|cRAP054|P04264|K2C1_HUMAN	Keratin, type II cytoskeletal 1 OS=Homo sapiens GN=KRT1 PE=1 SV=6	2924	66170	81	81	42	42	57.8	644	MSRQFSSRSGYRSGGGFSSGSAGIINYQRRTTSSSTRRSGGGGGRFSSCGGGGGSFGAGGGFGSRSLVNLGGSKSISISVARGGGRGSGFGGGYGGGGFGGGGFGGGGFGGGGIGGGGFGGFGSGGGGFGGGGFGGGGYGGGYGPVCPPGGIQEVTINQSLLQPLNVEIDPEIQKVKSREREQIKSLNNQFASFIDKVRFLEQQNQVLQTKWELLQQVDTSTRTHNLEPYFESFINNLRRRVDQLKSDQSRLDSELKNMQDMVEDYRNKYEDEINKRTNAENEFVTIKKDVDGAYMTKVDLQAKLDNLQQEIDFLTALYQAELSQMQTQISETNVILSMDNNRSLDLDSIIAEVKAQYEDIAQKSKAEAESLYQSKYEELQITAGRHGDSVRNSKIEIS…	6839	3226	1	1	1	856.057	2565.15	3	2565.14	0.0042	0	45.34	0.0032	R	MSGECAPNVSVSVSTSHTTISGGGSR	G
2	1::sp|cRAP054|P04264|K2C1_HUMAN	Keratin, type II cytoskeletal 1 OS=Homo sapiens GN=KRT1 PE=1 SV=6	2924	66170	81	81	42	42	57.8	644	MSRQFSSRSGYRSGGGFSSGSAGIINYQRRTTSSSTRRSGGGGGRFSSCGGGGGSFGAGGGFGSRSLVNLGGSKSISISVARGGGRGSGFGGGYGGGGFGGGGFGGGGFGGGGIGGGGFGGFGSGGGGFGGGGFGGGGYGGGYGPVCPPGGIQEVTINQSLLQPLNVEIDPEIQKVKSREREQIKSLNNQFASFIDKVRFLEQQNQVLQTKWELLQQVDTSTRTHNLEPYFESFINNLRRRVDQLKSDQSRLDSELKNMQDMVEDYRNKYEDEINKRTNAENEFVTIKKDVDGAYMTKVDLQAKLDNLQQEIDFLTALYQAELSQMQTQISETNVILSMDNNRSLDLDSIIAEVKAQYEDIAQKSKAEAESLYQSKYEELQITAGRHGDSVRNSKIEIS…	6865	3011	1	1	1	861.059	2580.16	3	2580.15	0.0013	0	40.69	0.011	R	MSGECAPNVSVSVSTSHTTISGGGSR	G
2	1::sp|cRAP054|P04264|K2C1_HUMAN	Keratin, type II cytoskeletal 1 OS=Homo sapiens GN=KRT1 PE=1 SV=6	2924	66170	81	81	42	42	57.8	644	MSRQFSSRSGYRSGGGFSSGSAGIINYQRRTTSSSTRRSGGGGGRFSSCGGGGGSFGAGGGFGSRSLVNLGGSKSISISVARGGGRGSGFGGGYGGGGFGGGGFGGGGFGGGGIGGGGFGGFGSGGGGFGGGGFGGGGYGGGYGPVCPPGGIQEVTINQSLLQPLNVEIDPEIQKVKSREREQIKSLNNQFASFIDKVRFLEQQNQVLQTKWELLQQVDTSTRTHNLEPYFESFINNLRRRVDQLKSDQSRLDSELKNMQDMVEDYRNKYEDEINKRTNAENEFVTIKKDVDGAYMTKVDLQAKLDNLQQEIDFLTALYQAELSQMQTQISETNVILSMDNNRSLDLDSIIAEVKAQYEDIAQKSKAEAESLYQSKYEELQITAGRHGDSVRNSKIEIS…	7491	6229	1	1	1	978.512	2932.51	3	2932.49	0.021	1	83.84	4.9e-07	R	FLEQQNQVLQTKWELLQQVDTSTR	T
3	2::tr|A0A151NFJ9|A0A151NFJ9_ALLMI	Uncharacterized protein OS=Alligator mississippiensis OX=8496 GN=Y1Q_0018187 PE=4 SV=1	2719	84511	168	168	45	45	69	754	MPPDMKISSEETVRKYFPETWIWDLIQMDSQGNAVLTLTIPDTITEWKASAFCTSEHSGFGLSPTVSLTAFQPFFLDLTLPYSVVRGEDFPLKATVFNYLAHCIRVSVSLSPCSDFSAAPVEKEEDAYCLCENERKTVSWTVTPKSLGEVEISVSAEALNGGLPCGDKVVEALSNWRKDTIIRKLLVEPEGIPRETTYNSLLCAAEKSAPSPVSLELPQNVVPDSARAYFSVLGDILGTAMHNLHQLLQMPFGCGEQNMVLFAPXXXILDYLNKTGQLKEETKSKAVGYLVSGYQRQLIYKHSDGSYSTFGPHSGQQGNTWLTAFVLKSFAQARRYMYIDSKHIQDAQLWLSSKQKENGCFRSSGMLLNNAIKGGVDDEVTLSAYITIALLEIPLPTTH…	7	4467	1	1	1	380.234	758.453	2	758.454	-0.0007	0	44.24	0.00087	R	ALLDSLK	K
3	2::tr|A0A151NFJ9|A0A151NFJ9_ALLMI	Uncharacterized protein OS=Alligator mississippiensis OX=8496 GN=Y1Q_0018187 PE=4 SV=1	2719	84511	168	168	45	45	69	754	MPPDMKISSEETVRKYFPETWIWDLIQMDSQGNAVLTLTIPDTITEWKASAFCTSEHSGFGLSPTVSLTAFQPFFLDLTLPYSVVRGEDFPLKATVFNYLAHCIRVSVSLSPCSDFSAAPVEKEEDAYCLCENERKTVSWTVTPKSLGEVEISVSAEALNGGLPCGDKVVEALSNWRKDTIIRKLLVEPEGIPRETTYNSLLCAAEKSAPSPVSLELPQNVVPDSARAYFSVLGDILGTAMHNLHQLLQMPFGCGEQNMVLFAPXXXILDYLNKTGQLKEETKSKAVGYLVSGYQRQLIYKHSDGSYSTFGPHSGQQGNTWLTAFVLKSFAQARRYMYIDSKHIQDAQLWLSSKQKENGCFRSSGMLLNNAIKGGVDDEVTLSAYITIALLEIPLPTTH…	8	3834	1	1	1	380.234	758.453	2	758.454	-0.0003	0	40.2	0.0022	R	ALLDSLK	K
3	2::tr|A0A151NFJ9|A0A151NFJ9_ALLMI	Uncharacterized protein OS=Alligator mississippiensis OX=8496 GN=Y1Q_0018187 PE=4 SV=1	2719	84511	168	168	45	45	69	754	MPPDMKISSEETVRKYFPETWIWDLIQMDSQGNAVLTLTIPDTITEWKASAFCTSEHSGFGLSPTVSLTAFQPFFLDLTLPYSVVRGEDFPLKATVFNYLAHCIRVSVSLSPCSDFSAAPVEKEEDAYCLCENERKTVSWTVTPKSLGEVEISVSAEALNGGLPCGDKVVEALSNWRKDTIIRKLLVEPEGIPRETTYNSLLCAAEKSAPSPVSLELPQNVVPDSARAYFSVLGDILGTAMHNLHQLLQMPFGCGEQNMVLFAPXXXILDYLNKTGQLKEETKSKAVGYLVSGYQRQLIYKHSDGSYSTFGPHSGQQGNTWLTAFVLKSFAQARRYMYIDSKHIQDAQLWLSSKQKENGCFRSSGMLLNNAIKGGVDDEVTLSAYITIALLEIPLPTTH…	68	1129	1	1	1	394.206	786.398	2	786.398	-0.0002	0	32.28	0.015	R	ADVNVNR	V
3	2::tr|A0A151NFJ9|A0A151NFJ9_ALLMI	Uncharacterized protein OS=Alligator mississippiensis OX=8496 GN=Y1Q_0018187 PE=4 SV=1	2719	84511	168	168	45	45	69	754	MPPDMKISSEETVRKYFPETWIWDLIQMDSQGNAVLTLTIPDTITEWKASAFCTSEHSGFGLSPTVSLTAFQPFFLDLTLPYSVVRGEDFPLKATVFNYLAHCIRVSVSLSPCSDFSAAPVEKEEDAYCLCENERKTVSWTVTPKSLGEVEISVSAEALNGGLPCGDKVVEALSNWRKDTIIRKLLVEPEGIPRETTYNSLLCAAEKSAPSPVSLELPQNVVPDSARAYFSVLGDILGTAMHNLHQLLQMPFGCGEQNMVLFAPXXXILDYLNKTGQLKEETKSKAVGYLVSGYQRQLIYKHSDGSYSTFGPHSGQQGNTWLTAFVLKSFAQARRYMYIDSKHIQDAQLWLSSKQKENGCFRSSGMLLNNAIKGGVDDEVTLSAYITIALLEIPLPTTH…	69	1047	1	1	1	394.207	786.399	2	786.398	0.0004	0	32.55	0.014	R	ADVNVNR	V
3	2::tr|A0A151NFJ9|A0A151NFJ9_ALLMI	Uncharacterized protein OS=Alligator mississippiensis OX=8496 GN=Y1Q_0018187 PE=4 SV=1	2719	84511	168	168	45	45	69	754	MPPDMKISSEETVRKYFPETWIWDLIQMDSQGNAVLTLTIPDTITEWKASAFCTSEHSGFGLSPTVSLTAFQPFFLDLTLPYSVVRGEDFPLKATVFNYLAHCIRVSVSLSPCSDFSAAPVEKEEDAYCLCENERKTVSWTVTPKSLGEVEISVSAEALNGGLPCGDKVVEALSNWRKDTIIRKLLVEPEGIPRETTYNSLLCAAEKSAPSPVSLELPQNVVPDSARAYFSVLGDILGTAMHNLHQLLQMPFGCGEQNMVLFAPXXXILDYLNKTGQLKEETKSKAVGYLVSGYQRQLIYKHSDGSYSTFGPHSGQQGNTWLTAFVLKSFAQARRYMYIDSKHIQDAQLWLSSKQKENGCFRSSGMLLNNAIKGGVDDEVTLSAYITIALLEIPLPTTH…	73	1153	1	1	1	394.698	787.381	2	787.382	-0.001	0	46.74	0.00051	R	ADVNVNR	V
3	2::tr|A0A151NFJ9|A0A151NFJ9_ALLMI	Uncharacterized protein OS=Alligator mississippiensis OX=8496 GN=Y1Q_0018187 PE=4 SV=1	2719	84511	168	168	45	45	69	754	MPPDMKISSEETVRKYFPETWIWDLIQMDSQGNAVLTLTIPDTITEWKASAFCTSEHSGFGLSPTVSLTAFQPFFLDLTLPYSVVRGEDFPLKATVFNYLAHCIRVSVSLSPCSDFSAAPVEKEEDAYCLCENERKTVSWTVTPKSLGEVEISVSAEALNGGLPCGDKVVEALSNWRKDTIIRKLLVEPEGIPRETTYNSLLCAAEKSAPSPVSLELPQNVVPDSARAYFSVLGDILGTAMHNLHQLLQMPFGCGEQNMVLFAPXXXILDYLNKTGQLKEETKSKAVGYLVSGYQRQLIYKHSDGSYSTFGPHSGQQGNTWLTAFVLKSFAQARRYMYIDSKHIQDAQLWLSSKQKENGCFRSSGMLLNNAIKGGVDDEVTLSAYITIALLEIPLPTTH…	145	3605	1	1	1	403.208	804.401	2	804.402	-0.0004	0	29.08	0.087	R	GEDFPLK	A
3	2::tr|A0A151NFJ9|A0A151NFJ9_ALLMI	Uncharacterized protein OS=Alligator mississippiensis OX=8496 GN=Y1Q_0018187 PE=4 SV=1	2719	84511	168	168	45	45	69	754	MPPDMKISSEETVRKYFPETWIWDLIQMDSQGNAVLTLTIPDTITEWKASAFCTSEHSGFGLSPTVSLTAFQPFFLDLTLPYSVVRGEDFPLKATVFNYLAHCIRVSVSLSPCSDFSAAPVEKEEDAYCLCENERKTVSWTVTPKSLGEVEISVSAEALNGGLPCGDKVVEALSNWRKDTIIRKLLVEPEGIPRETTYNSLLCAAEKSAPSPVSLELPQNVVPDSARAYFSVLGDILGTAMHNLHQLLQMPFGCGEQNMVLFAPXXXILDYLNKTGQLKEETKSKAVGYLVSGYQRQLIYKHSDGSYSTFGPHSGQQGNTWLTAFVLKSFAQARRYMYIDSKHIQDAQLWLSSKQKENGCFRSSGMLLNNAIKGGVDDEVTLSAYITIALLEIPLPTTH…	146	3466	1	1	1	403.209	804.404	2	804.402	0.0024	0	23.83	0.26	R	GEDFPLK	A
3	2::tr|A0A151NFJ9|A0A151NFJ9_ALLMI	Uncharacterized protein OS=Alligator mississippiensis OX=8496 GN=Y1Q_0018187 PE=4 SV=1	2719	84511	168	168	45	45	69	754	MPPDMKISSEETVRKYFPETWIWDLIQMDSQGNAVLTLTIPDTITEWKASAFCTSEHSGFGLSPTVSLTAFQPFFLDLTLPYSVVRGEDFPLKATVFNYLAHCIRVSVSLSPCSDFSAAPVEKEEDAYCLCENERKTVSWTVTPKSLGEVEISVSAEALNGGLPCGDKVVEALSNWRKDTIIRKLLVEPEGIPRETTYNSLLCAAEKSAPSPVSLELPQNVVPDSARAYFSVLGDILGTAMHNLHQLLQMPFGCGEQNMVLFAPXXXILDYLNKTGQLKEETKSKAVGYLVSGYQRQLIYKHSDGSYSTFGPHSGQQGNTWLTAFVLKSFAQARRYMYIDSKHIQDAQLWLSSKQKENGCFRSSGMLLNNAIKGGVDDEVTLSAYITIALLEIPLPTTH…	469	3206	1	1	1	444.281	886.548	2	886.549	-0.0012	1	39.2	0.004	R	ALLDSLKK	E
3	2::tr|A0A151NFJ9|A0A151NFJ9_ALLMI	Uncharacterized protein OS=Alligator mississippiensis OX=8496 GN=Y1Q_0018187 PE=4 SV=1	2719	84511	168	168	45	45	69	754	MPPDMKISSEETVRKYFPETWIWDLIQMDSQGNAVLTLTIPDTITEWKASAFCTSEHSGFGLSPTVSLTAFQPFFLDLTLPYSVVRGEDFPLKATVFNYLAHCIRVSVSLSPCSDFSAAPVEKEEDAYCLCENERKTVSWTVTPKSLGEVEISVSAEALNGGLPCGDKVVEALSNWRKDTIIRKLLVEPEGIPRETTYNSLLCAAEKSAPSPVSLELPQNVVPDSARAYFSVLGDILGTAMHNLHQLLQMPFGCGEQNMVLFAPXXXILDYLNKTGQLKEETKSKAVGYLVSGYQRQLIYKHSDGSYSTFGPHSGQQGNTWLTAFVLKSFAQARRYMYIDSKHIQDAQLWLSSKQKENGCFRSSGMLLNNAIKGGVDDEVTLSAYITIALLEIPLPTTH…	565	3216	1	1	1	460.214	918.413	2	918.416	-0.0028	0	34.32	0.023	R	YMYIDSK	H
3	2::tr|A0A151NFJ9|A0A151NFJ9_ALLMI	Uncharacterized protein OS=Alligator mississippiensis OX=8496 GN=Y1Q_0018187 PE=4 SV=1	2719	84511	168	168	45	45	69	754	MPPDMKISSEETVRKYFPETWIWDLIQMDSQGNAVLTLTIPDTITEWKASAFCTSEHSGFGLSPTVSLTAFQPFFLDLTLPYSVVRGEDFPLKATVFNYLAHCIRVSVSLSPCSDFSAAPVEKEEDAYCLCENERKTVSWTVTPKSLGEVEISVSAEALNGGLPCGDKVVEALSNWRKDTIIRKLLVEPEGIPRETTYNSLLCAAEKSAPSPVSLELPQNVVPDSARAYFSVLGDILGTAMHNLHQLLQMPFGCGEQNMVLFAPXXXILDYLNKTGQLKEETKSKAVGYLVSGYQRQLIYKHSDGSYSTFGPHSGQQGNTWLTAFVLKSFAQARRYMYIDSKHIQDAQLWLSSKQKENGCFRSSGMLLNNAIKGGVDDEVTLSAYITIALLEIPLPTTH…	567	1262	1	1	1	460.738	919.461	2	919.461	-0.0002	0	43.88	0.0045	K	ISSEETVR	K
3	2::tr|A0A151NFJ9|A0A151NFJ9_ALLMI	Uncharacterized protein OS=Alligator mississippiensis OX=8496 GN=Y1Q_0018187 PE=4 SV=1	2719	84511	168	168	45	45	69	754	MPPDMKISSEETVRKYFPETWIWDLIQMDSQGNAVLTLTIPDTITEWKASAFCTSEHSGFGLSPTVSLTAFQPFFLDLTLPYSVVRGEDFPLKATVFNYLAHCIRVSVSLSPCSDFSAAPVEKEEDAYCLCENERKTVSWTVTPKSLGEVEISVSAEALNGGLPCGDKVVEALSNWRKDTIIRKLLVEPEGIPRETTYNSLLCAAEKSAPSPVSLELPQNVVPDSARAYFSVLGDILGTAMHNLHQLLQMPFGCGEQNMVLFAPXXXILDYLNKTGQLKEETKSKAVGYLVSGYQRQLIYKHSDGSYSTFGPHSGQQGNTWLTAFVLKSFAQARRYMYIDSKHIQDAQLWLSSKQKENGCFRSSGMLLNNAIKGGVDDEVTLSAYITIALLEIPLPTTH…	609	2547	1	1	1	468.212	934.41	2	934.411	-0.0002	0	29.24	0.072	R	YMYIDSK	H
3	2::tr|A0A151NFJ9|A0A151NFJ9_ALLMI	Uncharacterized protein OS=Alligator mississippiensis OX=8496 GN=Y1Q_0018187 PE=4 SV=1	2719	84511	168	168	45	45	69	754	MPPDMKISSEETVRKYFPETWIWDLIQMDSQGNAVLTLTIPDTITEWKASAFCTSEHSGFGLSPTVSLTAFQPFFLDLTLPYSVVRGEDFPLKATVFNYLAHCIRVSVSLSPCSDFSAAPVEKEEDAYCLCENERKTVSWTVTPKSLGEVEISVSAEALNGGLPCGDKVVEALSNWRKDTIIRKLLVEPEGIPRETTYNSLLCAAEKSAPSPVSLELPQNVVPDSARAYFSVLGDILGTAMHNLHQLLQMPFGCGEQNMVLFAPXXXILDYLNKTGQLKEETKSKAVGYLVSGYQRQLIYKHSDGSYSTFGPHSGQQGNTWLTAFVLKSFAQARRYMYIDSKHIQDAQLWLSSKQKENGCFRSSGMLLNNAIKGGVDDEVTLSAYITIALLEIPLPTTH…	610	2436	1	1	1	468.212	934.41	2	934.411	-0.0002	0	37.02	0.012	R	YMYIDSK	H
3	2::tr|A0A151NFJ9|A0A151NFJ9_ALLMI	Uncharacterized protein OS=Alligator mississippiensis OX=8496 GN=Y1Q_0018187 PE=4 SV=1	2719	84511	168	168	45	45	69	754	MPPDMKISSEETVRKYFPETWIWDLIQMDSQGNAVLTLTIPDTITEWKASAFCTSEHSGFGLSPTVSLTAFQPFFLDLTLPYSVVRGEDFPLKATVFNYLAHCIRVSVSLSPCSDFSAAPVEKEEDAYCLCENERKTVSWTVTPKSLGEVEISVSAEALNGGLPCGDKVVEALSNWRKDTIIRKLLVEPEGIPRETTYNSLLCAAEKSAPSPVSLELPQNVVPDSARAYFSVLGDILGTAMHNLHQLLQMPFGCGEQNMVLFAPXXXILDYLNKTGQLKEETKSKAVGYLVSGYQRQLIYKHSDGSYSTFGPHSGQQGNTWLTAFVLKSFAQARRYMYIDSKHIQDAQLWLSSKQKENGCFRSSGMLLNNAIKGGVDDEVTLSAYITIALLEIPLPTTH…	646	752	1	1	1	472.257	942.499	2	942.5	-0.0003	1	50.27	0.00058	K	RADVNVNR	V
3	2::tr|A0A151NFJ9|A0A151NFJ9_ALLMI	Uncharacterized protein OS=Alligator mississippiensis OX=8496 GN=Y1Q_0018187 PE=4 SV=1	2719	84511	168	168	45	45	69	754	MPPDMKISSEETVRKYFPETWIWDLIQMDSQGNAVLTLTIPDTITEWKASAFCTSEHSGFGLSPTVSLTAFQPFFLDLTLPYSVVRGEDFPLKATVFNYLAHCIRVSVSLSPCSDFSAAPVEKEEDAYCLCENERKTVSWTVTPKSLGEVEISVSAEALNGGLPCGDKVVEALSNWRKDTIIRKLLVEPEGIPRETTYNSLLCAAEKSAPSPVSLELPQNVVPDSARAYFSVLGDILGTAMHNLHQLLQMPFGCGEQNMVLFAPXXXILDYLNKTGQLKEETKSKAVGYLVSGYQRQLIYKHSDGSYSTFGPHSGQQGNTWLTAFVLKSFAQARRYMYIDSKHIQDAQLWLSSKQKENGCFRSSGMLLNNAIKGGVDDEVTLSAYITIALLEIPLPTTH…	647	862	1	1	1	472.257	942.5	2	942.5	0	1	52.68	0.00034	K	RADVNVNR	V
3	2::tr|A0A151NFJ9|A0A151NFJ9_ALLMI	Uncharacterized protein OS=Alligator mississippiensis OX=8496 GN=Y1Q_0018187 PE=4 SV=1	2719	84511	168	168	45	45	69	754	MPPDMKISSEETVRKYFPETWIWDLIQMDSQGNAVLTLTIPDTITEWKASAFCTSEHSGFGLSPTVSLTAFQPFFLDLTLPYSVVRGEDFPLKATVFNYLAHCIRVSVSLSPCSDFSAAPVEKEEDAYCLCENERKTVSWTVTPKSLGEVEISVSAEALNGGLPCGDKVVEALSNWRKDTIIRKLLVEPEGIPRETTYNSLLCAAEKSAPSPVSLELPQNVVPDSARAYFSVLGDILGTAMHNLHQLLQMPFGCGEQNMVLFAPXXXILDYLNKTGQLKEETKSKAVGYLVSGYQRQLIYKHSDGSYSTFGPHSGQQGNTWLTAFVLKSFAQARRYMYIDSKHIQDAQLWLSSKQKENGCFRSSGMLLNNAIKGGVDDEVTLSAYITIALLEIPLPTTH…	754	5151	1	1	1	482.27	962.525	2	962.526	-0.0007	0	58.48	0.0001	K	MLSGFAPLK	A
3	2::tr|A0A151NFJ9|A0A151NFJ9_ALLMI	Uncharacterized protein OS=Alligator mississippiensis OX=8496 GN=Y1Q_0018187 PE=4 SV=1	2719	84511	168	168	45	45	69	754	MPPDMKISSEETVRKYFPETWIWDLIQMDSQGNAVLTLTIPDTITEWKASAFCTSEHSGFGLSPTVSLTAFQPFFLDLTLPYSVVRGEDFPLKATVFNYLAHCIRVSVSLSPCSDFSAAPVEKEEDAYCLCENERKTVSWTVTPKSLGEVEISVSAEALNGGLPCGDKVVEALSNWRKDTIIRKLLVEPEGIPRETTYNSLLCAAEKSAPSPVSLELPQNVVPDSARAYFSVLGDILGTAMHNLHQLLQMPFGCGEQNMVLFAPXXXILDYLNKTGQLKEETKSKAVGYLVSGYQRQLIYKHSDGSYSTFGPHSGQQGNTWLTAFVLKSFAQARRYMYIDSKHIQDAQLWLSSKQKENGCFRSSGMLLNNAIKGGVDDEVTLSAYITIALLEIPLPTTH…	755	5032	1	1	1	482.27	962.526	2	962.526	0.0003	0	58.85	9.6e-05	K	MLSGFAPLK	A
3	2::tr|A0A151NFJ9|A0A151NFJ9_ALLMI	Uncharacterized protein OS=Alligator mississippiensis OX=8496 GN=Y1Q_0018187 PE=4 SV=1	2719	84511	168	168	45	45	69	754	MPPDMKISSEETVRKYFPETWIWDLIQMDSQGNAVLTLTIPDTITEWKASAFCTSEHSGFGLSPTVSLTAFQPFFLDLTLPYSVVRGEDFPLKATVFNYLAHCIRVSVSLSPCSDFSAAPVEKEEDAYCLCENERKTVSWTVTPKSLGEVEISVSAEALNGGLPCGDKVVEALSNWRKDTIIRKLLVEPEGIPRETTYNSLLCAAEKSAPSPVSLELPQNVVPDSARAYFSVLGDILGTAMHNLHQLLQMPFGCGEQNMVLFAPXXXILDYLNKTGQLKEETKSKAVGYLVSGYQRQLIYKHSDGSYSTFGPHSGQQGNTWLTAFVLKSFAQARRYMYIDSKHIQDAQLWLSSKQKENGCFRSSGMLLNNAIKGGVDDEVTLSAYITIALLEIPLPTTH…	830	4790	1	1	1	490.265	978.516	2	978.521	-0.0043	0	23.46	0.33	K	MLSGFAPLK	A
3	2::tr|A0A151NFJ9|A0A151NFJ9_ALLMI	Uncharacterized protein OS=Alligator mississippiensis OX=8496 GN=Y1Q_0018187 PE=4 SV=1	2719	84511	168	168	45	45	69	754	MPPDMKISSEETVRKYFPETWIWDLIQMDSQGNAVLTLTIPDTITEWKASAFCTSEHSGFGLSPTVSLTAFQPFFLDLTLPYSVVRGEDFPLKATVFNYLAHCIRVSVSLSPCSDFSAAPVEKEEDAYCLCENERKTVSWTVTPKSLGEVEISVSAEALNGGLPCGDKVVEALSNWRKDTIIRKLLVEPEGIPRETTYNSLLCAAEKSAPSPVSLELPQNVVPDSARAYFSVLGDILGTAMHNLHQLLQMPFGCGEQNMVLFAPXXXILDYLNKTGQLKEETKSKAVGYLVSGYQRQLIYKHSDGSYSTFGPHSGQQGNTWLTAFVLKSFAQARRYMYIDSKHIQDAQLWLSSKQKENGCFRSSGMLLNNAIKGGVDDEVTLSAYITIALLEIPLPTTH…	831	4488	1	1	1	490.267	978.52	2	978.521	-0.0008	0	55.95	0.00019	K	MLSGFAPLK	A
3	2::tr|A0A151NFJ9|A0A151NFJ9_ALLMI	Uncharacterized protein OS=Alligator mississippiensis OX=8496 GN=Y1Q_0018187 PE=4 SV=1	2719	84511	168	168	45	45	69	754	MPPDMKISSEETVRKYFPETWIWDLIQMDSQGNAVLTLTIPDTITEWKASAFCTSEHSGFGLSPTVSLTAFQPFFLDLTLPYSVVRGEDFPLKATVFNYLAHCIRVSVSLSPCSDFSAAPVEKEEDAYCLCENERKTVSWTVTPKSLGEVEISVSAEALNGGLPCGDKVVEALSNWRKDTIIRKLLVEPEGIPRETTYNSLLCAAEKSAPSPVSLELPQNVVPDSARAYFSVLGDILGTAMHNLHQLLQMPFGCGEQNMVLFAPXXXILDYLNKTGQLKEETKSKAVGYLVSGYQRQLIYKHSDGSYSTFGPHSGQQGNTWLTAFVLKSFAQARRYMYIDSKHIQDAQLWLSSKQKENGCFRSSGMLLNNAIKGGVDDEVTLSAYITIALLEIPLPTTH…	832	4374	1	1	1	490.267	978.52	2	978.521	-0.0008	0	54.16	0.00029	K	MLSGFAPLK	A
3	2::tr|A0A151NFJ9|A0A151NFJ9_ALLMI	Uncharacterized protein OS=Alligator mississippiensis OX=8496 GN=Y1Q_0018187 PE=4 SV=1	2719	84511	168	168	45	45	69	754	MPPDMKISSEETVRKYFPETWIWDLIQMDSQGNAVLTLTIPDTITEWKASAFCTSEHSGFGLSPTVSLTAFQPFFLDLTLPYSVVRGEDFPLKATVFNYLAHCIRVSVSLSPCSDFSAAPVEKEEDAYCLCENERKTVSWTVTPKSLGEVEISVSAEALNGGLPCGDKVVEALSNWRKDTIIRKLLVEPEGIPRETTYNSLLCAAEKSAPSPVSLELPQNVVPDSARAYFSVLGDILGTAMHNLHQLLQMPFGCGEQNMVLFAPXXXILDYLNKTGQLKEETKSKAVGYLVSGYQRQLIYKHSDGSYSTFGPHSGQQGNTWLTAFVLKSFAQARRYMYIDSKHIQDAQLWLSSKQKENGCFRSSGMLLNNAIKGGVDDEVTLSAYITIALLEIPLPTTH…	833	5051	1	1	1	490.268	978.522	2	978.521	0.0014	0	53	0.00033	K	MLSGFAPLK	A
3	2::tr|A0A151NFJ9|A0A151NFJ9_ALLMI	Uncharacterized protein OS=Alligator mississippiensis OX=8496 GN=Y1Q_0018187 PE=4 SV=1	2719	84511	168	168	45	45	69	754	MPPDMKISSEETVRKYFPETWIWDLIQMDSQGNAVLTLTIPDTITEWKASAFCTSEHSGFGLSPTVSLTAFQPFFLDLTLPYSVVRGEDFPLKATVFNYLAHCIRVSVSLSPCSDFSAAPVEKEEDAYCLCENERKTVSWTVTPKSLGEVEISVSAEALNGGLPCGDKVVEALSNWRKDTIIRKLLVEPEGIPRETTYNSLLCAAEKSAPSPVSLELPQNVVPDSARAYFSVLGDILGTAMHNLHQLLQMPFGCGEQNMVLFAPXXXILDYLNKTGQLKEETKSKAVGYLVSGYQRQLIYKHSDGSYSTFGPHSGQQGNTWLTAFVLKSFAQARRYMYIDSKHIQDAQLWLSSKQKENGCFRSSGMLLNNAIKGGVDDEVTLSAYITIALLEIPLPTTH…	949	2117	1	1	1	502.288	1002.56	2	1002.56	0.0008	0	32.87	0.04	R	EIQVHHLK	Q
3	2::tr|A0A151NFJ9|A0A151NFJ9_ALLMI	Uncharacterized protein OS=Alligator mississippiensis OX=8496 GN=Y1Q_0018187 PE=4 SV=1	2719	84511	168	168	45	45	69	754	MPPDMKISSEETVRKYFPETWIWDLIQMDSQGNAVLTLTIPDTITEWKASAFCTSEHSGFGLSPTVSLTAFQPFFLDLTLPYSVVRGEDFPLKATVFNYLAHCIRVSVSLSPCSDFSAAPVEKEEDAYCLCENERKTVSWTVTPKSLGEVEISVSAEALNGGLPCGDKVVEALSNWRKDTIIRKLLVEPEGIPRETTYNSLLCAAEKSAPSPVSLELPQNVVPDSARAYFSVLGDILGTAMHNLHQLLQMPFGCGEQNMVLFAPXXXILDYLNKTGQLKEETKSKAVGYLVSGYQRQLIYKHSDGSYSTFGPHSGQQGNTWLTAFVLKSFAQARRYMYIDSKHIQDAQLWLSSKQKENGCFRSSGMLLNNAIKGGVDDEVTLSAYITIALLEIPLPTTH…	1021	3725	1	1	1	509.782	1017.55	2	1017.55	-0.0002	0	69.98	1.1e-05	K	TVSWTVTPK	S
3	2::tr|A0A151NFJ9|A0A151NFJ9_ALLMI	Uncharacterized protein OS=Alligator mississippiensis OX=8496 GN=Y1Q_0018187 PE=4 SV=1	2719	84511	168	168	45	45	69	754	MPPDMKISSEETVRKYFPETWIWDLIQMDSQGNAVLTLTIPDTITEWKASAFCTSEHSGFGLSPTVSLTAFQPFFLDLTLPYSVVRGEDFPLKATVFNYLAHCIRVSVSLSPCSDFSAAPVEKEEDAYCLCENERKTVSWTVTPKSLGEVEISVSAEALNGGLPCGDKVVEALSNWRKDTIIRKLLVEPEGIPRETTYNSLLCAAEKSAPSPVSLELPQNVVPDSARAYFSVLGDILGTAMHNLHQLLQMPFGCGEQNMVLFAPXXXILDYLNKTGQLKEETKSKAVGYLVSGYQRQLIYKHSDGSYSTFGPHSGQQGNTWLTAFVLKSFAQARRYMYIDSKHIQDAQLWLSSKQKENGCFRSSGMLLNNAIKGGVDDEVTLSAYITIALLEIPLPTTH…	1218	4332	1	1	1	537.29	1072.57	2	1072.57	0	0	47.4	0.0026	K	VVEALSNWR	K
3	2::tr|A0A151NFJ9|A0A151NFJ9_ALLMI	Uncharacterized protein OS=Alligator mississippiensis OX=8496 GN=Y1Q_0018187 PE=4 SV=1	2719	84511	168	168	45	45	69	754	MPPDMKISSEETVRKYFPETWIWDLIQMDSQGNAVLTLTIPDTITEWKASAFCTSEHSGFGLSPTVSLTAFQPFFLDLTLPYSVVRGEDFPLKATVFNYLAHCIRVSVSLSPCSDFSAAPVEKEEDAYCLCENERKTVSWTVTPKSLGEVEISVSAEALNGGLPCGDKVVEALSNWRKDTIIRKLLVEPEGIPRETTYNSLLCAAEKSAPSPVSLELPQNVVPDSARAYFSVLGDILGTAMHNLHQLLQMPFGCGEQNMVLFAPXXXILDYLNKTGQLKEETKSKAVGYLVSGYQRQLIYKHSDGSYSTFGPHSGQQGNTWLTAFVLKSFAQARRYMYIDSKHIQDAQLWLSSKQKENGCFRSSGMLLNNAIKGGVDDEVTLSAYITIALLEIPLPTTH…	1223	4664	1	1	1	537.784	1073.55	2	1073.55	0.0038	0	29.96	0.16	K	VVEALSNWR	K
3	2::tr|A0A151NFJ9|A0A151NFJ9_ALLMI	Uncharacterized protein OS=Alligator mississippiensis OX=8496 GN=Y1Q_0018187 PE=4 SV=1	2719	84511	168	168	45	45	69	754	MPPDMKISSEETVRKYFPETWIWDLIQMDSQGNAVLTLTIPDTITEWKASAFCTSEHSGFGLSPTVSLTAFQPFFLDLTLPYSVVRGEDFPLKATVFNYLAHCIRVSVSLSPCSDFSAAPVEKEEDAYCLCENERKTVSWTVTPKSLGEVEISVSAEALNGGLPCGDKVVEALSNWRKDTIIRKLLVEPEGIPRETTYNSLLCAAEKSAPSPVSLELPQNVVPDSARAYFSVLGDILGTAMHNLHQLLQMPFGCGEQNMVLFAPXXXILDYLNKTGQLKEETKSKAVGYLVSGYQRQLIYKHSDGSYSTFGPHSGQQGNTWLTAFVLKSFAQARRYMYIDSKHIQDAQLWLSSKQKENGCFRSSGMLLNNAIKGGVDDEVTLSAYITIALLEIPLPTTH…	1228	2500	1	1	1	538.264	1074.51	2	1074.52	-0.0042	1	27.39	0.21	R	RYMYIDSK	H
3	2::tr|A0A151NFJ9|A0A151NFJ9_ALLMI	Uncharacterized protein OS=Alligator mississippiensis OX=8496 GN=Y1Q_0018187 PE=4 SV=1	2719	84511	168	168	45	45	69	754	MPPDMKISSEETVRKYFPETWIWDLIQMDSQGNAVLTLTIPDTITEWKASAFCTSEHSGFGLSPTVSLTAFQPFFLDLTLPYSVVRGEDFPLKATVFNYLAHCIRVSVSLSPCSDFSAAPVEKEEDAYCLCENERKTVSWTVTPKSLGEVEISVSAEALNGGLPCGDKVVEALSNWRKDTIIRKLLVEPEGIPRETTYNSLLCAAEKSAPSPVSLELPQNVVPDSARAYFSVLGDILGTAMHNLHQLLQMPFGCGEQNMVLFAPXXXILDYLNKTGQLKEETKSKAVGYLVSGYQRQLIYKHSDGSYSTFGPHSGQQGNTWLTAFVLKSFAQARRYMYIDSKHIQDAQLWLSSKQKENGCFRSSGMLLNNAIKGGVDDEVTLSAYITIALLEIPLPTTH…	1229	2615	1	1	1	538.266	1074.52	2	1074.52	-0.0002	1	32.62	0.063	R	RYMYIDSK	H
3	2::tr|A0A151NFJ9|A0A151NFJ9_ALLMI	Uncharacterized protein OS=Alligator mississippiensis OX=8496 GN=Y1Q_0018187 PE=4 SV=1	2719	84511	168	168	45	45	69	754	MPPDMKISSEETVRKYFPETWIWDLIQMDSQGNAVLTLTIPDTITEWKASAFCTSEHSGFGLSPTVSLTAFQPFFLDLTLPYSVVRGEDFPLKATVFNYLAHCIRVSVSLSPCSDFSAAPVEKEEDAYCLCENERKTVSWTVTPKSLGEVEISVSAEALNGGLPCGDKVVEALSNWRKDTIIRKLLVEPEGIPRETTYNSLLCAAEKSAPSPVSLELPQNVVPDSARAYFSVLGDILGTAMHNLHQLLQMPFGCGEQNMVLFAPXXXILDYLNKTGQLKEETKSKAVGYLVSGYQRQLIYKHSDGSYSTFGPHSGQQGNTWLTAFVLKSFAQARRYMYIDSKHIQDAQLWLSSKQKENGCFRSSGMLLNNAIKGGVDDEVTLSAYITIALLEIPLPTTH…	1298	1820	1	1	1	546.263	1090.51	2	1090.51	-0.0011	1	38.92	0.014	R	RYMYIDSK	H
3	2::tr|A0A151NFJ9|A0A151NFJ9_ALLMI	Uncharacterized protein OS=Alligator mississippiensis OX=8496 GN=Y1Q_0018187 PE=4 SV=1	2719	84511	168	168	45	45	69	754	MPPDMKISSEETVRKYFPETWIWDLIQMDSQGNAVLTLTIPDTITEWKASAFCTSEHSGFGLSPTVSLTAFQPFFLDLTLPYSVVRGEDFPLKATVFNYLAHCIRVSVSLSPCSDFSAAPVEKEEDAYCLCENERKTVSWTVTPKSLGEVEISVSAEALNGGLPCGDKVVEALSNWRKDTIIRKLLVEPEGIPRETTYNSLLCAAEKSAPSPVSLELPQNVVPDSARAYFSVLGDILGTAMHNLHQLLQMPFGCGEQNMVLFAPXXXILDYLNKTGQLKEETKSKAVGYLVSGYQRQLIYKHSDGSYSTFGPHSGQQGNTWLTAFVLKSFAQARRYMYIDSKHIQDAQLWLSSKQKENGCFRSSGMLLNNAIKGGVDDEVTLSAYITIALLEIPLPTTH…	1430	4756	1	1	1	561.829	1121.64	2	1121.64	-0.0007	0	22.2	0.13	K	LLVEPEGIPR	E
3	2::tr|A0A151NFJ9|A0A151NFJ9_ALLMI	Uncharacterized protein OS=Alligator mississippiensis OX=8496 GN=Y1Q_0018187 PE=4 SV=1	2719	84511	168	168	45	45	69	754	MPPDMKISSEETVRKYFPETWIWDLIQMDSQGNAVLTLTIPDTITEWKASAFCTSEHSGFGLSPTVSLTAFQPFFLDLTLPYSVVRGEDFPLKATVFNYLAHCIRVSVSLSPCSDFSAAPVEKEEDAYCLCENERKTVSWTVTPKSLGEVEISVSAEALNGGLPCGDKVVEALSNWRKDTIIRKLLVEPEGIPRETTYNSLLCAAEKSAPSPVSLELPQNVVPDSARAYFSVLGDILGTAMHNLHQLLQMPFGCGEQNMVLFAPXXXILDYLNKTGQLKEETKSKAVGYLVSGYQRQLIYKHSDGSYSTFGPHSGQQGNTWLTAFVLKSFAQARRYMYIDSKHIQDAQLWLSSKQKENGCFRSSGMLLNNAIKGGVDDEVTLSAYITIALLEIPLPTTH…	1431	4623	1	1	1	561.829	1121.64	2	1121.64	-0.0003	0	52.19	0.00013	K	LLVEPEGIPR	E
3	2::tr|A0A151NFJ9|A0A151NFJ9_ALLMI	Uncharacterized protein OS=Alligator mississippiensis OX=8496 GN=Y1Q_0018187 PE=4 SV=1	2719	84511	168	168	45	45	69	754	MPPDMKISSEETVRKYFPETWIWDLIQMDSQGNAVLTLTIPDTITEWKASAFCTSEHSGFGLSPTVSLTAFQPFFLDLTLPYSVVRGEDFPLKATVFNYLAHCIRVSVSLSPCSDFSAAPVEKEEDAYCLCENERKTVSWTVTPKSLGEVEISVSAEALNGGLPCGDKVVEALSNWRKDTIIRKLLVEPEGIPRETTYNSLLCAAEKSAPSPVSLELPQNVVPDSARAYFSVLGDILGTAMHNLHQLLQMPFGCGEQNMVLFAPXXXILDYLNKTGQLKEETKSKAVGYLVSGYQRQLIYKHSDGSYSTFGPHSGQQGNTWLTAFVLKSFAQARRYMYIDSKHIQDAQLWLSSKQKENGCFRSSGMLLNNAIKGGVDDEVTLSAYITIALLEIPLPTTH…	1549	2809	1	1	1	573.829	1145.64	2	1145.64	-0.0011	1	44.31	0.0024	R	KTVSWTVTPK	S
3	2::tr|A0A151NFJ9|A0A151NFJ9_ALLMI	Uncharacterized protein OS=Alligator mississippiensis OX=8496 GN=Y1Q_0018187 PE=4 SV=1	2719	84511	168	168	45	45	69	754	MPPDMKISSEETVRKYFPETWIWDLIQMDSQGNAVLTLTIPDTITEWKASAFCTSEHSGFGLSPTVSLTAFQPFFLDLTLPYSVVRGEDFPLKATVFNYLAHCIRVSVSLSPCSDFSAAPVEKEEDAYCLCENERKTVSWTVTPKSLGEVEISVSAEALNGGLPCGDKVVEALSNWRKDTIIRKLLVEPEGIPRETTYNSLLCAAEKSAPSPVSLELPQNVVPDSARAYFSVLGDILGTAMHNLHQLLQMPFGCGEQNMVLFAPXXXILDYLNKTGQLKEETKSKAVGYLVSGYQRQLIYKHSDGSYSTFGPHSGQQGNTWLTAFVLKSFAQARRYMYIDSKHIQDAQLWLSSKQKENGCFRSSGMLLNNAIKGGVDDEVTLSAYITIALLEIPLPTTH…	1550	2698	2	1	1	382.889	1145.64	3	1145.64	-0.0009	1	34.82	0.022	R	KTVSWTVTPK	S
3	2::tr|A0A151NFJ9|A0A151NFJ9_ALLMI	Uncharacterized protein OS=Alligator mississippiensis OX=8496 GN=Y1Q_0018187 PE=4 SV=1	2719	84511	168	168	45	45	69	754	MPPDMKISSEETVRKYFPETWIWDLIQMDSQGNAVLTLTIPDTITEWKASAFCTSEHSGFGLSPTVSLTAFQPFFLDLTLPYSVVRGEDFPLKATVFNYLAHCIRVSVSLSPCSDFSAAPVEKEEDAYCLCENERKTVSWTVTPKSLGEVEISVSAEALNGGLPCGDKVVEALSNWRKDTIIRKLLVEPEGIPRETTYNSLLCAAEKSAPSPVSLELPQNVVPDSARAYFSVLGDILGTAMHNLHQLLQMPFGCGEQNMVLFAPXXXILDYLNKTGQLKEETKSKAVGYLVSGYQRQLIYKHSDGSYSTFGPHSGQQGNTWLTAFVLKSFAQARRYMYIDSKHIQDAQLWLSSKQKENGCFRSSGMLLNNAIKGGVDDEVTLSAYITIALLEIPLPTTH…	1551	2691	1	1	1	573.83	1145.64	2	1145.64	-0.0001	1	51.78	0.00045	R	KTVSWTVTPK	S
3	2::tr|A0A151NFJ9|A0A151NFJ9_ALLMI	Uncharacterized protein OS=Alligator mississippiensis OX=8496 GN=Y1Q_0018187 PE=4 SV=1	2719	84511	168	168	45	45	69	754	MPPDMKISSEETVRKYFPETWIWDLIQMDSQGNAVLTLTIPDTITEWKASAFCTSEHSGFGLSPTVSLTAFQPFFLDLTLPYSVVRGEDFPLKATVFNYLAHCIRVSVSLSPCSDFSAAPVEKEEDAYCLCENERKTVSWTVTPKSLGEVEISVSAEALNGGLPCGDKVVEALSNWRKDTIIRKLLVEPEGIPRETTYNSLLCAAEKSAPSPVSLELPQNVVPDSARAYFSVLGDILGTAMHNLHQLLQMPFGCGEQNMVLFAPXXXILDYLNKTGQLKEETKSKAVGYLVSGYQRQLIYKHSDGSYSTFGPHSGQQGNTWLTAFVLKSFAQARRYMYIDSKHIQDAQLWLSSKQKENGCFRSSGMLLNNAIKGGVDDEVTLSAYITIALLEIPLPTTH…	1558	4082	1	1	1	574.31	1146.61	2	1146.61	-0.0005	0	75.06	3.8e-06	R	SSGMLLNNAIK	G
3	2::tr|A0A151NFJ9|A0A151NFJ9_ALLMI	Uncharacterized protein OS=Alligator mississippiensis OX=8496 GN=Y1Q_0018187 PE=4 SV=1	2719	84511	168	168	45	45	69	754	MPPDMKISSEETVRKYFPETWIWDLIQMDSQGNAVLTLTIPDTITEWKASAFCTSEHSGFGLSPTVSLTAFQPFFLDLTLPYSVVRGEDFPLKATVFNYLAHCIRVSVSLSPCSDFSAAPVEKEEDAYCLCENERKTVSWTVTPKSLGEVEISVSAEALNGGLPCGDKVVEALSNWRKDTIIRKLLVEPEGIPRETTYNSLLCAAEKSAPSPVSLELPQNVVPDSARAYFSVLGDILGTAMHNLHQLLQMPFGCGEQNMVLFAPXXXILDYLNKTGQLKEETKSKAVGYLVSGYQRQLIYKHSDGSYSTFGPHSGQQGNTWLTAFVLKSFAQARRYMYIDSKHIQDAQLWLSSKQKENGCFRSSGMLLNNAIKGGVDDEVTLSAYITIALLEIPLPTTH…	1559	4216	1	1	1	574.311	1146.61	2	1146.61	0	0	56.13	0.0003	R	SSGMLLNNAIK	G
3	2::tr|A0A151NFJ9|A0A151NFJ9_ALLMI	Uncharacterized protein OS=Alligator mississippiensis OX=8496 GN=Y1Q_0018187 PE=4 SV=1	2719	84511	168	168	45	45	69	754	MPPDMKISSEETVRKYFPETWIWDLIQMDSQGNAVLTLTIPDTITEWKASAFCTSEHSGFGLSPTVSLTAFQPFFLDLTLPYSVVRGEDFPLKATVFNYLAHCIRVSVSLSPCSDFSAAPVEKEEDAYCLCENERKTVSWTVTPKSLGEVEISVSAEALNGGLPCGDKVVEALSNWRKDTIIRKLLVEPEGIPRETTYNSLLCAAEKSAPSPVSLELPQNVVPDSARAYFSVLGDILGTAMHNLHQLLQMPFGCGEQNMVLFAPXXXILDYLNKTGQLKEETKSKAVGYLVSGYQRQLIYKHSDGSYSTFGPHSGQQGNTWLTAFVLKSFAQARRYMYIDSKHIQDAQLWLSSKQKENGCFRSSGMLLNNAIKGGVDDEVTLSAYITIALLEIPLPTTH…	1567	4468	1	1	1	574.802	1147.59	2	1147.59	-0.0004	0	60.73	0.0001	R	SSGMLLNNAIK	G
3	2::tr|A0A151NFJ9|A0A151NFJ9_ALLMI	Uncharacterized protein OS=Alligator mississippiensis OX=8496 GN=Y1Q_0018187 PE=4 SV=1	2719	84511	168	168	45	45	69	754	MPPDMKISSEETVRKYFPETWIWDLIQMDSQGNAVLTLTIPDTITEWKASAFCTSEHSGFGLSPTVSLTAFQPFFLDLTLPYSVVRGEDFPLKATVFNYLAHCIRVSVSLSPCSDFSAAPVEKEEDAYCLCENERKTVSWTVTPKSLGEVEISVSAEALNGGLPCGDKVVEALSNWRKDTIIRKLLVEPEGIPRETTYNSLLCAAEKSAPSPVSLELPQNVVPDSARAYFSVLGDILGTAMHNLHQLLQMPFGCGEQNMVLFAPXXXILDYLNKTGQLKEETKSKAVGYLVSGYQRQLIYKHSDGSYSTFGPHSGQQGNTWLTAFVLKSFAQARRYMYIDSKHIQDAQLWLSSKQKENGCFRSSGMLLNNAIKGGVDDEVTLSAYITIALLEIPLPTTH…	1568	4349	1	1	1	574.803	1147.59	2	1147.59	-0.0001	0	64.5	4.2e-05	R	SSGMLLNNAIK	G
3	2::tr|A0A151NFJ9|A0A151NFJ9_ALLMI	Uncharacterized protein OS=Alligator mississippiensis OX=8496 GN=Y1Q_0018187 PE=4 SV=1	2719	84511	168	168	45	45	69	754	MPPDMKISSEETVRKYFPETWIWDLIQMDSQGNAVLTLTIPDTITEWKASAFCTSEHSGFGLSPTVSLTAFQPFFLDLTLPYSVVRGEDFPLKATVFNYLAHCIRVSVSLSPCSDFSAAPVEKEEDAYCLCENERKTVSWTVTPKSLGEVEISVSAEALNGGLPCGDKVVEALSNWRKDTIIRKLLVEPEGIPRETTYNSLLCAAEKSAPSPVSLELPQNVVPDSARAYFSVLGDILGTAMHNLHQLLQMPFGCGEQNMVLFAPXXXILDYLNKTGQLKEETKSKAVGYLVSGYQRQLIYKHSDGSYSTFGPHSGQQGNTWLTAFVLKSFAQARRYMYIDSKHIQDAQLWLSSKQKENGCFRSSGMLLNNAIKGGVDDEVTLSAYITIALLEIPLPTTH…	1569	4762	1	1	1	574.803	1147.59	2	1147.59	0.0001	0	59.01	0.00015	R	SSGMLLNNAIK	G
3	2::tr|A0A151NFJ9|A0A151NFJ9_ALLMI	Uncharacterized protein OS=Alligator mississippiensis OX=8496 GN=Y1Q_0018187 PE=4 SV=1	2719	84511	168	168	45	45	69	754	MPPDMKISSEETVRKYFPETWIWDLIQMDSQGNAVLTLTIPDTITEWKASAFCTSEHSGFGLSPTVSLTAFQPFFLDLTLPYSVVRGEDFPLKATVFNYLAHCIRVSVSLSPCSDFSAAPVEKEEDAYCLCENERKTVSWTVTPKSLGEVEISVSAEALNGGLPCGDKVVEALSNWRKDTIIRKLLVEPEGIPRETTYNSLLCAAEKSAPSPVSLELPQNVVPDSARAYFSVLGDILGTAMHNLHQLLQMPFGCGEQNMVLFAPXXXILDYLNKTGQLKEETKSKAVGYLVSGYQRQLIYKHSDGSYSTFGPHSGQQGNTWLTAFVLKSFAQARRYMYIDSKHIQDAQLWLSSKQKENGCFRSSGMLLNNAIKGGVDDEVTLSAYITIALLEIPLPTTH…	1645	4105	1	1	1	582.308	1162.6	2	1162.6	-0.0009	0	74.1	4e-06	R	SSGMLLNNAIK	G
3	2::tr|A0A151NFJ9|A0A151NFJ9_ALLMI	Uncharacterized protein OS=Alligator mississippiensis OX=8496 GN=Y1Q_0018187 PE=4 SV=1	2719	84511	168	168	45	45	69	754	MPPDMKISSEETVRKYFPETWIWDLIQMDSQGNAVLTLTIPDTITEWKASAFCTSEHSGFGLSPTVSLTAFQPFFLDLTLPYSVVRGEDFPLKATVFNYLAHCIRVSVSLSPCSDFSAAPVEKEEDAYCLCENERKTVSWTVTPKSLGEVEISVSAEALNGGLPCGDKVVEALSNWRKDTIIRKLLVEPEGIPRETTYNSLLCAAEKSAPSPVSLELPQNVVPDSARAYFSVLGDILGTAMHNLHQLLQMPFGCGEQNMVLFAPXXXILDYLNKTGQLKEETKSKAVGYLVSGYQRQLIYKHSDGSYSTFGPHSGQQGNTWLTAFVLKSFAQARRYMYIDSKHIQDAQLWLSSKQKENGCFRSSGMLLNNAIKGGVDDEVTLSAYITIALLEIPLPTTH…	1646	3322	1	1	1	582.308	1162.6	2	1162.6	-0.0008	0	65.44	2.9e-05	R	SSGMLLNNAIK	G
3	2::tr|A0A151NFJ9|A0A151NFJ9_ALLMI	Uncharacterized protein OS=Alligator mississippiensis OX=8496 GN=Y1Q_0018187 PE=4 SV=1	2719	84511	168	168	45	45	69	754	MPPDMKISSEETVRKYFPETWIWDLIQMDSQGNAVLTLTIPDTITEWKASAFCTSEHSGFGLSPTVSLTAFQPFFLDLTLPYSVVRGEDFPLKATVFNYLAHCIRVSVSLSPCSDFSAAPVEKEEDAYCLCENERKTVSWTVTPKSLGEVEISVSAEALNGGLPCGDKVVEALSNWRKDTIIRKLLVEPEGIPRETTYNSLLCAAEKSAPSPVSLELPQNVVPDSARAYFSVLGDILGTAMHNLHQLLQMPFGCGEQNMVLFAPXXXILDYLNKTGQLKEETKSKAVGYLVSGYQRQLIYKHSDGSYSTFGPHSGQQGNTWLTAFVLKSFAQARRYMYIDSKHIQDAQLWLSSKQKENGCFRSSGMLLNNAIKGGVDDEVTLSAYITIALLEIPLPTTH…	1696	4167	1	1	1	588.818	1175.62	2	1175.62	-0.0009	0	97.75	2e-08	R	LSSNMAIVDVK	M
3	2::tr|A0A151NFJ9|A0A151NFJ9_ALLMI	Uncharacterized protein OS=Alligator mississippiensis OX=8496 GN=Y1Q_0018187 PE=4 SV=1	2719	84511	168	168	45	45	69	754	MPPDMKISSEETVRKYFPETWIWDLIQMDSQGNAVLTLTIPDTITEWKASAFCTSEHSGFGLSPTVSLTAFQPFFLDLTLPYSVVRGEDFPLKATVFNYLAHCIRVSVSLSPCSDFSAAPVEKEEDAYCLCENERKTVSWTVTPKSLGEVEISVSAEALNGGLPCGDKVVEALSNWRKDTIIRKLLVEPEGIPRETTYNSLLCAAEKSAPSPVSLELPQNVVPDSARAYFSVLGDILGTAMHNLHQLLQMPFGCGEQNMVLFAPXXXILDYLNKTGQLKEETKSKAVGYLVSGYQRQLIYKHSDGSYSTFGPHSGQQGNTWLTAFVLKSFAQARRYMYIDSKHIQDAQLWLSSKQKENGCFRSSGMLLNNAIKGGVDDEVTLSAYITIALLEIPLPTTH…	1697	4291	1	1	1	588.818	1175.62	2	1175.62	-0.0002	0	98.21	1.8e-08	R	LSSNMAIVDVK	M
3	2::tr|A0A151NFJ9|A0A151NFJ9_ALLMI	Uncharacterized protein OS=Alligator mississippiensis OX=8496 GN=Y1Q_0018187 PE=4 SV=1	2719	84511	168	168	45	45	69	754	MPPDMKISSEETVRKYFPETWIWDLIQMDSQGNAVLTLTIPDTITEWKASAFCTSEHSGFGLSPTVSLTAFQPFFLDLTLPYSVVRGEDFPLKATVFNYLAHCIRVSVSLSPCSDFSAAPVEKEEDAYCLCENERKTVSWTVTPKSLGEVEISVSAEALNGGLPCGDKVVEALSNWRKDTIIRKLLVEPEGIPRETTYNSLLCAAEKSAPSPVSLELPQNVVPDSARAYFSVLGDILGTAMHNLHQLLQMPFGCGEQNMVLFAPXXXILDYLNKTGQLKEETKSKAVGYLVSGYQRQLIYKHSDGSYSTFGPHSGQQGNTWLTAFVLKSFAQARRYMYIDSKHIQDAQLWLSSKQKENGCFRSSGMLLNNAIKGGVDDEVTLSAYITIALLEIPLPTTH…	1698	4663	1	1	1	589.309	1176.6	2	1176.61	-0.003	0	74.78	4.6e-06	R	LSSNMAIVDVK	M
3	2::tr|A0A151NFJ9|A0A151NFJ9_ALLMI	Uncharacterized protein OS=Alligator mississippiensis OX=8496 GN=Y1Q_0018187 PE=4 SV=1	2719	84511	168	168	45	45	69	754	MPPDMKISSEETVRKYFPETWIWDLIQMDSQGNAVLTLTIPDTITEWKASAFCTSEHSGFGLSPTVSLTAFQPFFLDLTLPYSVVRGEDFPLKATVFNYLAHCIRVSVSLSPCSDFSAAPVEKEEDAYCLCENERKTVSWTVTPKSLGEVEISVSAEALNGGLPCGDKVVEALSNWRKDTIIRKLLVEPEGIPRETTYNSLLCAAEKSAPSPVSLELPQNVVPDSARAYFSVLGDILGTAMHNLHQLLQMPFGCGEQNMVLFAPXXXILDYLNKTGQLKEETKSKAVGYLVSGYQRQLIYKHSDGSYSTFGPHSGQQGNTWLTAFVLKSFAQARRYMYIDSKHIQDAQLWLSSKQKENGCFRSSGMLLNNAIKGGVDDEVTLSAYITIALLEIPLPTTH…	1699	4528	1	1	1	589.312	1176.61	2	1176.61	0.0032	0	42.51	0.0071	R	LSSNMAIVDVK	M
3	2::tr|A0A151NFJ9|A0A151NFJ9_ALLMI	Uncharacterized protein OS=Alligator mississippiensis OX=8496 GN=Y1Q_0018187 PE=4 SV=1	2719	84511	168	168	45	45	69	754	MPPDMKISSEETVRKYFPETWIWDLIQMDSQGNAVLTLTIPDTITEWKASAFCTSEHSGFGLSPTVSLTAFQPFFLDLTLPYSVVRGEDFPLKATVFNYLAHCIRVSVSLSPCSDFSAAPVEKEEDAYCLCENERKTVSWTVTPKSLGEVEISVSAEALNGGLPCGDKVVEALSNWRKDTIIRKLLVEPEGIPRETTYNSLLCAAEKSAPSPVSLELPQNVVPDSARAYFSVLGDILGTAMHNLHQLLQMPFGCGEQNMVLFAPXXXILDYLNKTGQLKEETKSKAVGYLVSGYQRQLIYKHSDGSYSTFGPHSGQQGNTWLTAFVLKSFAQARRYMYIDSKHIQDAQLWLSSKQKENGCFRSSGMLLNNAIKGGVDDEVTLSAYITIALLEIPLPTTH…	1750	3245	1	1	1	596.814	1191.61	2	1191.62	-0.0028	0	77.5	2.2e-06	R	LSSNMAIVDVK	M
3	2::tr|A0A151NFJ9|A0A151NFJ9_ALLMI	Uncharacterized protein OS=Alligator mississippiensis OX=8496 GN=Y1Q_0018187 PE=4 SV=1	2719	84511	168	168	45	45	69	754	MPPDMKISSEETVRKYFPETWIWDLIQMDSQGNAVLTLTIPDTITEWKASAFCTSEHSGFGLSPTVSLTAFQPFFLDLTLPYSVVRGEDFPLKATVFNYLAHCIRVSVSLSPCSDFSAAPVEKEEDAYCLCENERKTVSWTVTPKSLGEVEISVSAEALNGGLPCGDKVVEALSNWRKDTIIRKLLVEPEGIPRETTYNSLLCAAEKSAPSPVSLELPQNVVPDSARAYFSVLGDILGTAMHNLHQLLQMPFGCGEQNMVLFAPXXXILDYLNKTGQLKEETKSKAVGYLVSGYQRQLIYKHSDGSYSTFGPHSGQQGNTWLTAFVLKSFAQARRYMYIDSKHIQDAQLWLSSKQKENGCFRSSGMLLNNAIKGGVDDEVTLSAYITIALLEIPLPTTH…	1751	3378	1	1	1	596.815	1191.62	2	1191.62	-0.0012	0	81.82	7.1e-07	R	LSSNMAIVDVK	M
3	2::tr|A0A151NFJ9|A0A151NFJ9_ALLMI	Uncharacterized protein OS=Alligator mississippiensis OX=8496 GN=Y1Q_0018187 PE=4 SV=1	2719	84511	168	168	45	45	69	754	MPPDMKISSEETVRKYFPETWIWDLIQMDSQGNAVLTLTIPDTITEWKASAFCTSEHSGFGLSPTVSLTAFQPFFLDLTLPYSVVRGEDFPLKATVFNYLAHCIRVSVSLSPCSDFSAAPVEKEEDAYCLCENERKTVSWTVTPKSLGEVEISVSAEALNGGLPCGDKVVEALSNWRKDTIIRKLLVEPEGIPRETTYNSLLCAAEKSAPSPVSLELPQNVVPDSARAYFSVLGDILGTAMHNLHQLLQMPFGCGEQNMVLFAPXXXILDYLNKTGQLKEETKSKAVGYLVSGYQRQLIYKHSDGSYSTFGPHSGQQGNTWLTAFVLKSFAQARRYMYIDSKHIQDAQLWLSSKQKENGCFRSSGMLLNNAIKGGVDDEVTLSAYITIALLEIPLPTTH…	1752	4250	1	1	1	596.816	1191.62	2	1191.62	-0.0005	0	61.21	8.3e-05	R	LSSNMAIVDVK	M
3	2::tr|A0A151NFJ9|A0A151NFJ9_ALLMI	Uncharacterized protein OS=Alligator mississippiensis OX=8496 GN=Y1Q_0018187 PE=4 SV=1	2719	84511	168	168	45	45	69	754	MPPDMKISSEETVRKYFPETWIWDLIQMDSQGNAVLTLTIPDTITEWKASAFCTSEHSGFGLSPTVSLTAFQPFFLDLTLPYSVVRGEDFPLKATVFNYLAHCIRVSVSLSPCSDFSAAPVEKEEDAYCLCENERKTVSWTVTPKSLGEVEISVSAEALNGGLPCGDKVVEALSNWRKDTIIRKLLVEPEGIPRETTYNSLLCAAEKSAPSPVSLELPQNVVPDSARAYFSVLGDILGTAMHNLHQLLQMPFGCGEQNMVLFAPXXXILDYLNKTGQLKEETKSKAVGYLVSGYQRQLIYKHSDGSYSTFGPHSGQQGNTWLTAFVLKSFAQARRYMYIDSKHIQDAQLWLSSKQKENGCFRSSGMLLNNAIKGGVDDEVTLSAYITIALLEIPLPTTH…	1753	3158	1	1	1	596.816	1191.62	2	1191.62	0.0003	0	121.31	8.1e-11	R	LSSNMAIVDVK	M
3	2::tr|A0A151NFJ9|A0A151NFJ9_ALLMI	Uncharacterized protein OS=Alligator mississippiensis OX=8496 GN=Y1Q_0018187 PE=4 SV=1	2719	84511	168	168	45	45	69	754	MPPDMKISSEETVRKYFPETWIWDLIQMDSQGNAVLTLTIPDTITEWKASAFCTSEHSGFGLSPTVSLTAFQPFFLDLTLPYSVVRGEDFPLKATVFNYLAHCIRVSVSLSPCSDFSAAPVEKEEDAYCLCENERKTVSWTVTPKSLGEVEISVSAEALNGGLPCGDKVVEALSNWRKDTIIRKLLVEPEGIPRETTYNSLLCAAEKSAPSPVSLELPQNVVPDSARAYFSVLGDILGTAMHNLHQLLQMPFGCGEQNMVLFAPXXXILDYLNKTGQLKEETKSKAVGYLVSGYQRQLIYKHSDGSYSTFGPHSGQQGNTWLTAFVLKSFAQARRYMYIDSKHIQDAQLWLSSKQKENGCFRSSGMLLNNAIKGGVDDEVTLSAYITIALLEIPLPTTH…	1825	7128	1	1	1	604.855	1207.7	2	1207.7	-0.0003	0	50.47	0.00025	K	ALLAYAFALAGK	V
3	2::tr|A0A151NFJ9|A0A151NFJ9_ALLMI	Uncharacterized protein OS=Alligator mississippiensis OX=8496 GN=Y1Q_0018187 PE=4 SV=1	2719	84511	168	168	45	45	69	754	MPPDMKISSEETVRKYFPETWIWDLIQMDSQGNAVLTLTIPDTITEWKASAFCTSEHSGFGLSPTVSLTAFQPFFLDLTLPYSVVRGEDFPLKATVFNYLAHCIRVSVSLSPCSDFSAAPVEKEEDAYCLCENERKTVSWTVTPKSLGEVEISVSAEALNGGLPCGDKVVEALSNWRKDTIIRKLLVEPEGIPRETTYNSLLCAAEKSAPSPVSLELPQNVVPDSARAYFSVLGDILGTAMHNLHQLLQMPFGCGEQNMVLFAPXXXILDYLNKTGQLKEETKSKAVGYLVSGYQRQLIYKHSDGSYSTFGPHSGQQGNTWLTAFVLKSFAQARRYMYIDSKHIQDAQLWLSSKQKENGCFRSSGMLLNNAIKGGVDDEVTLSAYITIALLEIPLPTTH…	1840	4079	1	1	1	606.821	1211.63	2	1211.63	-0.0016	0	41.41	0.0055	K	AVGYLVSGYQR	Q
3	2::tr|A0A151NFJ9|A0A151NFJ9_ALLMI	Uncharacterized protein OS=Alligator mississippiensis OX=8496 GN=Y1Q_0018187 PE=4 SV=1	2719	84511	168	168	45	45	69	754	MPPDMKISSEETVRKYFPETWIWDLIQMDSQGNAVLTLTIPDTITEWKASAFCTSEHSGFGLSPTVSLTAFQPFFLDLTLPYSVVRGEDFPLKATVFNYLAHCIRVSVSLSPCSDFSAAPVEKEEDAYCLCENERKTVSWTVTPKSLGEVEISVSAEALNGGLPCGDKVVEALSNWRKDTIIRKLLVEPEGIPRETTYNSLLCAAEKSAPSPVSLELPQNVVPDSARAYFSVLGDILGTAMHNLHQLLQMPFGCGEQNMVLFAPXXXILDYLNKTGQLKEETKSKAVGYLVSGYQRQLIYKHSDGSYSTFGPHSGQQGNTWLTAFVLKSFAQARRYMYIDSKHIQDAQLWLSSKQKENGCFRSSGMLLNNAIKGGVDDEVTLSAYITIALLEIPLPTTH…	1841	3945	1	1	1	606.822	1211.63	2	1211.63	-0.0006	0	52.86	0.00037	K	AVGYLVSGYQR	Q
3	2::tr|A0A151NFJ9|A0A151NFJ9_ALLMI	Uncharacterized protein OS=Alligator mississippiensis OX=8496 GN=Y1Q_0018187 PE=4 SV=1	2719	84511	168	168	45	45	69	754	MPPDMKISSEETVRKYFPETWIWDLIQMDSQGNAVLTLTIPDTITEWKASAFCTSEHSGFGLSPTVSLTAFQPFFLDLTLPYSVVRGEDFPLKATVFNYLAHCIRVSVSLSPCSDFSAAPVEKEEDAYCLCENERKTVSWTVTPKSLGEVEISVSAEALNGGLPCGDKVVEALSNWRKDTIIRKLLVEPEGIPRETTYNSLLCAAEKSAPSPVSLELPQNVVPDSARAYFSVLGDILGTAMHNLHQLLQMPFGCGEQNMVLFAPXXXILDYLNKTGQLKEETKSKAVGYLVSGYQRQLIYKHSDGSYSTFGPHSGQQGNTWLTAFVLKSFAQARRYMYIDSKHIQDAQLWLSSKQKENGCFRSSGMLLNNAIKGGVDDEVTLSAYITIALLEIPLPTTH…	1842	3968	1	1	1	404.884	1211.63	3	1211.63	-0.0005	0	55.33	0.00021	K	AVGYLVSGYQR	Q
3	2::tr|A0A151NFJ9|A0A151NFJ9_ALLMI	Uncharacterized protein OS=Alligator mississippiensis OX=8496 GN=Y1Q_0018187 PE=4 SV=1	2719	84511	168	168	45	45	69	754	MPPDMKISSEETVRKYFPETWIWDLIQMDSQGNAVLTLTIPDTITEWKASAFCTSEHSGFGLSPTVSLTAFQPFFLDLTLPYSVVRGEDFPLKATVFNYLAHCIRVSVSLSPCSDFSAAPVEKEEDAYCLCENERKTVSWTVTPKSLGEVEISVSAEALNGGLPCGDKVVEALSNWRKDTIIRKLLVEPEGIPRETTYNSLLCAAEKSAPSPVSLELPQNVVPDSARAYFSVLGDILGTAMHNLHQLLQMPFGCGEQNMVLFAPXXXILDYLNKTGQLKEETKSKAVGYLVSGYQRQLIYKHSDGSYSTFGPHSGQQGNTWLTAFVLKSFAQARRYMYIDSKHIQDAQLWLSSKQKENGCFRSSGMLLNNAIKGGVDDEVTLSAYITIALLEIPLPTTH…	2020	3806	1	1	1	625.876	1249.74	2	1249.74	-0.0009	1	61.98	1.2e-05	R	KLLVEPEGIPR	E
3	2::tr|A0A151NFJ9|A0A151NFJ9_ALLMI	Uncharacterized protein OS=Alligator mississippiensis OX=8496 GN=Y1Q_0018187 PE=4 SV=1	2719	84511	168	168	45	45	69	754	MPPDMKISSEETVRKYFPETWIWDLIQMDSQGNAVLTLTIPDTITEWKASAFCTSEHSGFGLSPTVSLTAFQPFFLDLTLPYSVVRGEDFPLKATVFNYLAHCIRVSVSLSPCSDFSAAPVEKEEDAYCLCENERKTVSWTVTPKSLGEVEISVSAEALNGGLPCGDKVVEALSNWRKDTIIRKLLVEPEGIPRETTYNSLLCAAEKSAPSPVSLELPQNVVPDSARAYFSVLGDILGTAMHNLHQLLQMPFGCGEQNMVLFAPXXXILDYLNKTGQLKEETKSKAVGYLVSGYQRQLIYKHSDGSYSTFGPHSGQQGNTWLTAFVLKSFAQARRYMYIDSKHIQDAQLWLSSKQKENGCFRSSGMLLNNAIKGGVDDEVTLSAYITIALLEIPLPTTH…	2021	3942	1	1	1	417.587	1249.74	3	1249.74	-0.0009	1	40.32	0.0017	R	KLLVEPEGIPR	E
3	2::tr|A0A151NFJ9|A0A151NFJ9_ALLMI	Uncharacterized protein OS=Alligator mississippiensis OX=8496 GN=Y1Q_0018187 PE=4 SV=1	2719	84511	168	168	45	45	69	754	MPPDMKISSEETVRKYFPETWIWDLIQMDSQGNAVLTLTIPDTITEWKASAFCTSEHSGFGLSPTVSLTAFQPFFLDLTLPYSVVRGEDFPLKATVFNYLAHCIRVSVSLSPCSDFSAAPVEKEEDAYCLCENERKTVSWTVTPKSLGEVEISVSAEALNGGLPCGDKVVEALSNWRKDTIIRKLLVEPEGIPRETTYNSLLCAAEKSAPSPVSLELPQNVVPDSARAYFSVLGDILGTAMHNLHQLLQMPFGCGEQNMVLFAPXXXILDYLNKTGQLKEETKSKAVGYLVSGYQRQLIYKHSDGSYSTFGPHSGQQGNTWLTAFVLKSFAQARRYMYIDSKHIQDAQLWLSSKQKENGCFRSSGMLLNNAIKGGVDDEVTLSAYITIALLEIPLPTTH…	2022	3805	1	1	1	417.587	1249.74	3	1249.74	-0.0004	1	40.63	0.0016	R	KLLVEPEGIPR	E
3	2::tr|A0A151NFJ9|A0A151NFJ9_ALLMI	Uncharacterized protein OS=Alligator mississippiensis OX=8496 GN=Y1Q_0018187 PE=4 SV=1	2719	84511	168	168	45	45	69	754	MPPDMKISSEETVRKYFPETWIWDLIQMDSQGNAVLTLTIPDTITEWKASAFCTSEHSGFGLSPTVSLTAFQPFFLDLTLPYSVVRGEDFPLKATVFNYLAHCIRVSVSLSPCSDFSAAPVEKEEDAYCLCENERKTVSWTVTPKSLGEVEISVSAEALNGGLPCGDKVVEALSNWRKDTIIRKLLVEPEGIPRETTYNSLLCAAEKSAPSPVSLELPQNVVPDSARAYFSVLGDILGTAMHNLHQLLQMPFGCGEQNMVLFAPXXXILDYLNKTGQLKEETKSKAVGYLVSGYQRQLIYKHSDGSYSTFGPHSGQQGNTWLTAFVLKSFAQARRYMYIDSKHIQDAQLWLSSKQKENGCFRSSGMLLNNAIKGGVDDEVTLSAYITIALLEIPLPTTH…	2676	3670	1	1	1	690.33	1378.65	2	1378.65	-0.001	0	61.36	8.3e-05	K	DDGATTVTLETEK	G
3	2::tr|A0A151NFJ9|A0A151NFJ9_ALLMI	Uncharacterized protein OS=Alligator mississippiensis OX=8496 GN=Y1Q_0018187 PE=4 SV=1	2719	84511	168	168	45	45	69	754	MPPDMKISSEETVRKYFPETWIWDLIQMDSQGNAVLTLTIPDTITEWKASAFCTSEHSGFGLSPTVSLTAFQPFFLDLTLPYSVVRGEDFPLKATVFNYLAHCIRVSVSLSPCSDFSAAPVEKEEDAYCLCENERKTVSWTVTPKSLGEVEISVSAEALNGGLPCGDKVVEALSNWRKDTIIRKLLVEPEGIPRETTYNSLLCAAEKSAPSPVSLELPQNVVPDSARAYFSVLGDILGTAMHNLHQLLQMPFGCGEQNMVLFAPXXXILDYLNKTGQLKEETKSKAVGYLVSGYQRQLIYKHSDGSYSTFGPHSGQQGNTWLTAFVLKSFAQARRYMYIDSKHIQDAQLWLSSKQKENGCFRSSGMLLNNAIKGGVDDEVTLSAYITIALLEIPLPTTH…	2677	3374	1	1	1	690.33	1378.65	2	1378.65	-0.0004	0	80.04	1.1e-06	K	DDGATTVTLETEK	G
3	2::tr|A0A151NFJ9|A0A151NFJ9_ALLMI	Uncharacterized protein OS=Alligator mississippiensis OX=8496 GN=Y1Q_0018187 PE=4 SV=1	2719	84511	168	168	45	45	69	754	MPPDMKISSEETVRKYFPETWIWDLIQMDSQGNAVLTLTIPDTITEWKASAFCTSEHSGFGLSPTVSLTAFQPFFLDLTLPYSVVRGEDFPLKATVFNYLAHCIRVSVSLSPCSDFSAAPVEKEEDAYCLCENERKTVSWTVTPKSLGEVEISVSAEALNGGLPCGDKVVEALSNWRKDTIIRKLLVEPEGIPRETTYNSLLCAAEKSAPSPVSLELPQNVVPDSARAYFSVLGDILGTAMHNLHQLLQMPFGCGEQNMVLFAPXXXILDYLNKTGQLKEETKSKAVGYLVSGYQRQLIYKHSDGSYSTFGPHSGQQGNTWLTAFVLKSFAQARRYMYIDSKHIQDAQLWLSSKQKENGCFRSSGMLLNNAIKGGVDDEVTLSAYITIALLEIPLPTTH…	2678	3884	1	1	1	690.331	1378.65	2	1378.65	0.0003	0	30.83	0.091	K	DDGATTVTLETEK	G
3	2::tr|A0A151NFJ9|A0A151NFJ9_ALLMI	Uncharacterized protein OS=Alligator mississippiensis OX=8496 GN=Y1Q_0018187 PE=4 SV=1	2719	84511	168	168	45	45	69	754	MPPDMKISSEETVRKYFPETWIWDLIQMDSQGNAVLTLTIPDTITEWKASAFCTSEHSGFGLSPTVSLTAFQPFFLDLTLPYSVVRGEDFPLKATVFNYLAHCIRVSVSLSPCSDFSAAPVEKEEDAYCLCENERKTVSWTVTPKSLGEVEISVSAEALNGGLPCGDKVVEALSNWRKDTIIRKLLVEPEGIPRETTYNSLLCAAEKSAPSPVSLELPQNVVPDSARAYFSVLGDILGTAMHNLHQLLQMPFGCGEQNMVLFAPXXXILDYLNKTGQLKEETKSKAVGYLVSGYQRQLIYKHSDGSYSTFGPHSGQQGNTWLTAFVLKSFAQARRYMYIDSKHIQDAQLWLSSKQKENGCFRSSGMLLNNAIKGGVDDEVTLSAYITIALLEIPLPTTH…	2679	3260	1	1	1	690.331	1378.65	2	1378.65	0.0003	0	79.12	1.4e-06	K	DDGATTVTLETEK	G
3	2::tr|A0A151NFJ9|A0A151NFJ9_ALLMI	Uncharacterized protein OS=Alligator mississippiensis OX=8496 GN=Y1Q_0018187 PE=4 SV=1	2719	84511	168	168	45	45	69	754	MPPDMKISSEETVRKYFPETWIWDLIQMDSQGNAVLTLTIPDTITEWKASAFCTSEHSGFGLSPTVSLTAFQPFFLDLTLPYSVVRGEDFPLKATVFNYLAHCIRVSVSLSPCSDFSAAPVEKEEDAYCLCENERKTVSWTVTPKSLGEVEISVSAEALNGGLPCGDKVVEALSNWRKDTIIRKLLVEPEGIPRETTYNSLLCAAEKSAPSPVSLELPQNVVPDSARAYFSVLGDILGTAMHNLHQLLQMPFGCGEQNMVLFAPXXXILDYLNKTGQLKEETKSKAVGYLVSGYQRQLIYKHSDGSYSTFGPHSGQQGNTWLTAFVLKSFAQARRYMYIDSKHIQDAQLWLSSKQKENGCFRSSGMLLNNAIKGGVDDEVTLSAYITIALLEIPLPTTH…	2680	3477	1	1	1	690.331	1378.65	2	1378.65	0.0004	0	68.89	1.4e-05	K	DDGATTVTLETEK	G
3	2::tr|A0A151NFJ9|A0A151NFJ9_ALLMI	Uncharacterized protein OS=Alligator mississippiensis OX=8496 GN=Y1Q_0018187 PE=4 SV=1	2719	84511	168	168	45	45	69	754	MPPDMKISSEETVRKYFPETWIWDLIQMDSQGNAVLTLTIPDTITEWKASAFCTSEHSGFGLSPTVSLTAFQPFFLDLTLPYSVVRGEDFPLKATVFNYLAHCIRVSVSLSPCSDFSAAPVEKEEDAYCLCENERKTVSWTVTPKSLGEVEISVSAEALNGGLPCGDKVVEALSNWRKDTIIRKLLVEPEGIPRETTYNSLLCAAEKSAPSPVSLELPQNVVPDSARAYFSVLGDILGTAMHNLHQLLQMPFGCGEQNMVLFAPXXXILDYLNKTGQLKEETKSKAVGYLVSGYQRQLIYKHSDGSYSTFGPHSGQQGNTWLTAFVLKSFAQARRYMYIDSKHIQDAQLWLSSKQKENGCFRSSGMLLNNAIKGGVDDEVTLSAYITIALLEIPLPTTH…	2784	3559	1	1	1	466.905	1397.69	3	1397.69	-0.0018	1	27.3	0.2	K	EAVKEDGSIHWK	R
3	2::tr|A0A151NFJ9|A0A151NFJ9_ALLMI	Uncharacterized protein OS=Alligator mississippiensis OX=8496 GN=Y1Q_0018187 PE=4 SV=1	2719	84511	168	168	45	45	69	754	MPPDMKISSEETVRKYFPETWIWDLIQMDSQGNAVLTLTIPDTITEWKASAFCTSEHSGFGLSPTVSLTAFQPFFLDLTLPYSVVRGEDFPLKATVFNYLAHCIRVSVSLSPCSDFSAAPVEKEEDAYCLCENERKTVSWTVTPKSLGEVEISVSAEALNGGLPCGDKVVEALSNWRKDTIIRKLLVEPEGIPRETTYNSLLCAAEKSAPSPVSLELPQNVVPDSARAYFSVLGDILGTAMHNLHQLLQMPFGCGEQNMVLFAPXXXILDYLNKTGQLKEETKSKAVGYLVSGYQRQLIYKHSDGSYSTFGPHSGQQGNTWLTAFVLKSFAQARRYMYIDSKHIQDAQLWLSSKQKENGCFRSSGMLLNNAIKGGVDDEVTLSAYITIALLEIPLPTTH…	2786	3384	1	1	1	466.905	1397.69	3	1397.69	-0.0009	1	26.27	0.25	K	EAVKEDGSIHWK	R
3	2::tr|A0A151NFJ9|A0A151NFJ9_ALLMI	Uncharacterized protein OS=Alligator mississippiensis OX=8496 GN=Y1Q_0018187 PE=4 SV=1	2719	84511	168	168	45	45	69	754	MPPDMKISSEETVRKYFPETWIWDLIQMDSQGNAVLTLTIPDTITEWKASAFCTSEHSGFGLSPTVSLTAFQPFFLDLTLPYSVVRGEDFPLKATVFNYLAHCIRVSVSLSPCSDFSAAPVEKEEDAYCLCENERKTVSWTVTPKSLGEVEISVSAEALNGGLPCGDKVVEALSNWRKDTIIRKLLVEPEGIPRETTYNSLLCAAEKSAPSPVSLELPQNVVPDSARAYFSVLGDILGTAMHNLHQLLQMPFGCGEQNMVLFAPXXXILDYLNKTGQLKEETKSKAVGYLVSGYQRQLIYKHSDGSYSTFGPHSGQQGNTWLTAFVLKSFAQARRYMYIDSKHIQDAQLWLSSKQKENGCFRSSGMLLNNAIKGGVDDEVTLSAYITIALLEIPLPTTH…	2787	2962	1	1	1	466.905	1397.69	3	1397.69	-0.0006	1	34.75	0.036	K	EAVKEDGSIHWK	R
3	2::tr|A0A151NFJ9|A0A151NFJ9_ALLMI	Uncharacterized protein OS=Alligator mississippiensis OX=8496 GN=Y1Q_0018187 PE=4 SV=1	2719	84511	168	168	45	45	69	754	MPPDMKISSEETVRKYFPETWIWDLIQMDSQGNAVLTLTIPDTITEWKASAFCTSEHSGFGLSPTVSLTAFQPFFLDLTLPYSVVRGEDFPLKATVFNYLAHCIRVSVSLSPCSDFSAAPVEKEEDAYCLCENERKTVSWTVTPKSLGEVEISVSAEALNGGLPCGDKVVEALSNWRKDTIIRKLLVEPEGIPRETTYNSLLCAAEKSAPSPVSLELPQNVVPDSARAYFSVLGDILGTAMHNLHQLLQMPFGCGEQNMVLFAPXXXILDYLNKTGQLKEETKSKAVGYLVSGYQRQLIYKHSDGSYSTFGPHSGQQGNTWLTAFVLKSFAQARRYMYIDSKHIQDAQLWLSSKQKENGCFRSSGMLLNNAIKGGVDDEVTLSAYITIALLEIPLPTTH…	2788	2824	1	1	1	466.905	1397.69	3	1397.69	-0.0005	1	27.69	0.18	K	EAVKEDGSIHWK	R
3	2::tr|A0A151NFJ9|A0A151NFJ9_ALLMI	Uncharacterized protein OS=Alligator mississippiensis OX=8496 GN=Y1Q_0018187 PE=4 SV=1	2719	84511	168	168	45	45	69	754	MPPDMKISSEETVRKYFPETWIWDLIQMDSQGNAVLTLTIPDTITEWKASAFCTSEHSGFGLSPTVSLTAFQPFFLDLTLPYSVVRGEDFPLKATVFNYLAHCIRVSVSLSPCSDFSAAPVEKEEDAYCLCENERKTVSWTVTPKSLGEVEISVSAEALNGGLPCGDKVVEALSNWRKDTIIRKLLVEPEGIPRETTYNSLLCAAEKSAPSPVSLELPQNVVPDSARAYFSVLGDILGTAMHNLHQLLQMPFGCGEQNMVLFAPXXXILDYLNKTGQLKEETKSKAVGYLVSGYQRQLIYKHSDGSYSTFGPHSGQQGNTWLTAFVLKSFAQARRYMYIDSKHIQDAQLWLSSKQKENGCFRSSGMLLNNAIKGGVDDEVTLSAYITIALLEIPLPTTH…	2789	3088	1	1	1	466.905	1397.69	3	1397.69	-0.0004	1	31.63	0.073	K	EAVKEDGSIHWK	R
3	2::tr|A0A151NFJ9|A0A151NFJ9_ALLMI	Uncharacterized protein OS=Alligator mississippiensis OX=8496 GN=Y1Q_0018187 PE=4 SV=1	2719	84511	168	168	45	45	69	754	MPPDMKISSEETVRKYFPETWIWDLIQMDSQGNAVLTLTIPDTITEWKASAFCTSEHSGFGLSPTVSLTAFQPFFLDLTLPYSVVRGEDFPLKATVFNYLAHCIRVSVSLSPCSDFSAAPVEKEEDAYCLCENERKTVSWTVTPKSLGEVEISVSAEALNGGLPCGDKVVEALSNWRKDTIIRKLLVEPEGIPRETTYNSLLCAAEKSAPSPVSLELPQNVVPDSARAYFSVLGDILGTAMHNLHQLLQMPFGCGEQNMVLFAPXXXILDYLNKTGQLKEETKSKAVGYLVSGYQRQLIYKHSDGSYSTFGPHSGQQGNTWLTAFVLKSFAQARRYMYIDSKHIQDAQLWLSSKQKENGCFRSSGMLLNNAIKGGVDDEVTLSAYITIALLEIPLPTTH…	2920	4289	1	1	1	713.377	1424.74	2	1424.74	-0.0021	0	94.12	3.7e-08	K	HIQDAQLWLSSK	Q
3	2::tr|A0A151NFJ9|A0A151NFJ9_ALLMI	Uncharacterized protein OS=Alligator mississippiensis OX=8496 GN=Y1Q_0018187 PE=4 SV=1	2719	84511	168	168	45	45	69	754	MPPDMKISSEETVRKYFPETWIWDLIQMDSQGNAVLTLTIPDTITEWKASAFCTSEHSGFGLSPTVSLTAFQPFFLDLTLPYSVVRGEDFPLKATVFNYLAHCIRVSVSLSPCSDFSAAPVEKEEDAYCLCENERKTVSWTVTPKSLGEVEISVSAEALNGGLPCGDKVVEALSNWRKDTIIRKLLVEPEGIPRETTYNSLLCAAEKSAPSPVSLELPQNVVPDSARAYFSVLGDILGTAMHNLHQLLQMPFGCGEQNMVLFAPXXXILDYLNKTGQLKEETKSKAVGYLVSGYQRQLIYKHSDGSYSTFGPHSGQQGNTWLTAFVLKSFAQARRYMYIDSKHIQDAQLWLSSKQKENGCFRSSGMLLNNAIKGGVDDEVTLSAYITIALLEIPLPTTH…	2922	4293	1	1	1	475.921	1424.74	3	1424.74	-0.0005	0	54.66	0.00032	K	HIQDAQLWLSSK	Q
3	2::tr|A0A151NFJ9|A0A151NFJ9_ALLMI	Uncharacterized protein OS=Alligator mississippiensis OX=8496 GN=Y1Q_0018187 PE=4 SV=1	2719	84511	168	168	45	45	69	754	MPPDMKISSEETVRKYFPETWIWDLIQMDSQGNAVLTLTIPDTITEWKASAFCTSEHSGFGLSPTVSLTAFQPFFLDLTLPYSVVRGEDFPLKATVFNYLAHCIRVSVSLSPCSDFSAAPVEKEEDAYCLCENERKTVSWTVTPKSLGEVEISVSAEALNGGLPCGDKVVEALSNWRKDTIIRKLLVEPEGIPRETTYNSLLCAAEKSAPSPVSLELPQNVVPDSARAYFSVLGDILGTAMHNLHQLLQMPFGCGEQNMVLFAPXXXILDYLNKTGQLKEETKSKAVGYLVSGYQRQLIYKHSDGSYSTFGPHSGQQGNTWLTAFVLKSFAQARRYMYIDSKHIQDAQLWLSSKQKENGCFRSSGMLLNNAIKGGVDDEVTLSAYITIALLEIPLPTTH…	2923	4408	1	1	1	475.921	1424.74	3	1424.74	-0.0003	0	46.57	0.002	K	HIQDAQLWLSSK	Q
3	2::tr|A0A151NFJ9|A0A151NFJ9_ALLMI	Uncharacterized protein OS=Alligator mississippiensis OX=8496 GN=Y1Q_0018187 PE=4 SV=1	2719	84511	168	168	45	45	69	754	MPPDMKISSEETVRKYFPETWIWDLIQMDSQGNAVLTLTIPDTITEWKASAFCTSEHSGFGLSPTVSLTAFQPFFLDLTLPYSVVRGEDFPLKATVFNYLAHCIRVSVSLSPCSDFSAAPVEKEEDAYCLCENERKTVSWTVTPKSLGEVEISVSAEALNGGLPCGDKVVEALSNWRKDTIIRKLLVEPEGIPRETTYNSLLCAAEKSAPSPVSLELPQNVVPDSARAYFSVLGDILGTAMHNLHQLLQMPFGCGEQNMVLFAPXXXILDYLNKTGQLKEETKSKAVGYLVSGYQRQLIYKHSDGSYSTFGPHSGQQGNTWLTAFVLKSFAQARRYMYIDSKHIQDAQLWLSSKQKENGCFRSSGMLLNNAIKGGVDDEVTLSAYITIALLEIPLPTTH…	2924	4481	1	1	1	713.379	1424.74	2	1424.74	0.0012	0	37.56	0.017	K	HIQDAQLWLSSK	Q
3	2::tr|A0A151NFJ9|A0A151NFJ9_ALLMI	Uncharacterized protein OS=Alligator mississippiensis OX=8496 GN=Y1Q_0018187 PE=4 SV=1	2719	84511	168	168	45	45	69	754	MPPDMKISSEETVRKYFPETWIWDLIQMDSQGNAVLTLTIPDTITEWKASAFCTSEHSGFGLSPTVSLTAFQPFFLDLTLPYSVVRGEDFPLKATVFNYLAHCIRVSVSLSPCSDFSAAPVEKEEDAYCLCENERKTVSWTVTPKSLGEVEISVSAEALNGGLPCGDKVVEALSNWRKDTIIRKLLVEPEGIPRETTYNSLLCAAEKSAPSPVSLELPQNVVPDSARAYFSVLGDILGTAMHNLHQLLQMPFGCGEQNMVLFAPXXXILDYLNKTGQLKEETKSKAVGYLVSGYQRQLIYKHSDGSYSTFGPHSGQQGNTWLTAFVLKSFAQARRYMYIDSKHIQDAQLWLSSKQKENGCFRSSGMLLNNAIKGGVDDEVTLSAYITIALLEIPLPTTH…	2931	3437	1	1	1	476.592	1426.76	3	1426.76	-0.0011	1	30.47	0.085	K	SKAVGYLVSGYQR	Q
3	2::tr|A0A151NFJ9|A0A151NFJ9_ALLMI	Uncharacterized protein OS=Alligator mississippiensis OX=8496 GN=Y1Q_0018187 PE=4 SV=1	2719	84511	168	168	45	45	69	754	MPPDMKISSEETVRKYFPETWIWDLIQMDSQGNAVLTLTIPDTITEWKASAFCTSEHSGFGLSPTVSLTAFQPFFLDLTLPYSVVRGEDFPLKATVFNYLAHCIRVSVSLSPCSDFSAAPVEKEEDAYCLCENERKTVSWTVTPKSLGEVEISVSAEALNGGLPCGDKVVEALSNWRKDTIIRKLLVEPEGIPRETTYNSLLCAAEKSAPSPVSLELPQNVVPDSARAYFSVLGDILGTAMHNLHQLLQMPFGCGEQNMVLFAPXXXILDYLNKTGQLKEETKSKAVGYLVSGYQRQLIYKHSDGSYSTFGPHSGQQGNTWLTAFVLKSFAQARRYMYIDSKHIQDAQLWLSSKQKENGCFRSSGMLLNNAIKGGVDDEVTLSAYITIALLEIPLPTTH…	3105	5777	1	1	1	488.919	1463.73	3	1463.73	-0.0003	0	30.65	0.12	K	ATVFNYLAHCIR	V
3	2::tr|A0A151NFJ9|A0A151NFJ9_ALLMI	Uncharacterized protein OS=Alligator mississippiensis OX=8496 GN=Y1Q_0018187 PE=4 SV=1	2719	84511	168	168	45	45	69	754	MPPDMKISSEETVRKYFPETWIWDLIQMDSQGNAVLTLTIPDTITEWKASAFCTSEHSGFGLSPTVSLTAFQPFFLDLTLPYSVVRGEDFPLKATVFNYLAHCIRVSVSLSPCSDFSAAPVEKEEDAYCLCENERKTVSWTVTPKSLGEVEISVSAEALNGGLPCGDKVVEALSNWRKDTIIRKLLVEPEGIPRETTYNSLLCAAEKSAPSPVSLELPQNVVPDSARAYFSVLGDILGTAMHNLHQLLQMPFGCGEQNMVLFAPXXXILDYLNKTGQLKEETKSKAVGYLVSGYQRQLIYKHSDGSYSTFGPHSGQQGNTWLTAFVLKSFAQARRYMYIDSKHIQDAQLWLSSKQKENGCFRSSGMLLNNAIKGGVDDEVTLSAYITIALLEIPLPTTH…	3106	5643	1	1	1	488.919	1463.73	3	1463.73	0.0002	0	54.32	0.00051	K	ATVFNYLAHCIR	V
3	2::tr|A0A151NFJ9|A0A151NFJ9_ALLMI	Uncharacterized protein OS=Alligator mississippiensis OX=8496 GN=Y1Q_0018187 PE=4 SV=1	2719	84511	168	168	45	45	69	754	MPPDMKISSEETVRKYFPETWIWDLIQMDSQGNAVLTLTIPDTITEWKASAFCTSEHSGFGLSPTVSLTAFQPFFLDLTLPYSVVRGEDFPLKATVFNYLAHCIRVSVSLSPCSDFSAAPVEKEEDAYCLCENERKTVSWTVTPKSLGEVEISVSAEALNGGLPCGDKVVEALSNWRKDTIIRKLLVEPEGIPRETTYNSLLCAAEKSAPSPVSLELPQNVVPDSARAYFSVLGDILGTAMHNLHQLLQMPFGCGEQNMVLFAPXXXILDYLNKTGQLKEETKSKAVGYLVSGYQRQLIYKHSDGSYSTFGPHSGQQGNTWLTAFVLKSFAQARRYMYIDSKHIQDAQLWLSSKQKENGCFRSSGMLLNNAIKGGVDDEVTLSAYITIALLEIPLPTTH…	3107	5664	1	1	1	732.875	1463.73	2	1463.73	0.0002	0	56.35	0.00032	K	ATVFNYLAHCIR	V
3	2::tr|A0A151NFJ9|A0A151NFJ9_ALLMI	Uncharacterized protein OS=Alligator mississippiensis OX=8496 GN=Y1Q_0018187 PE=4 SV=1	2719	84511	168	168	45	45	69	754	MPPDMKISSEETVRKYFPETWIWDLIQMDSQGNAVLTLTIPDTITEWKASAFCTSEHSGFGLSPTVSLTAFQPFFLDLTLPYSVVRGEDFPLKATVFNYLAHCIRVSVSLSPCSDFSAAPVEKEEDAYCLCENERKTVSWTVTPKSLGEVEISVSAEALNGGLPCGDKVVEALSNWRKDTIIRKLLVEPEGIPRETTYNSLLCAAEKSAPSPVSLELPQNVVPDSARAYFSVLGDILGTAMHNLHQLLQMPFGCGEQNMVLFAPXXXILDYLNKTGQLKEETKSKAVGYLVSGYQRQLIYKHSDGSYSTFGPHSGQQGNTWLTAFVLKSFAQARRYMYIDSKHIQDAQLWLSSKQKENGCFRSSGMLLNNAIKGGVDDEVTLSAYITIALLEIPLPTTH…	3315	4893	1	1	1	750.355	1498.69	2	1498.7	-0.0024	0	82.55	4.7e-07	R	ETTYNSLLCAAEK	S
3	2::tr|A0A151NFJ9|A0A151NFJ9_ALLMI	Uncharacterized protein OS=Alligator mississippiensis OX=8496 GN=Y1Q_0018187 PE=4 SV=1	2719	84511	168	168	45	45	69	754	MPPDMKISSEETVRKYFPETWIWDLIQMDSQGNAVLTLTIPDTITEWKASAFCTSEHSGFGLSPTVSLTAFQPFFLDLTLPYSVVRGEDFPLKATVFNYLAHCIRVSVSLSPCSDFSAAPVEKEEDAYCLCENERKTVSWTVTPKSLGEVEISVSAEALNGGLPCGDKVVEALSNWRKDTIIRKLLVEPEGIPRETTYNSLLCAAEKSAPSPVSLELPQNVVPDSARAYFSVLGDILGTAMHNLHQLLQMPFGCGEQNMVLFAPXXXILDYLNKTGQLKEETKSKAVGYLVSGYQRQLIYKHSDGSYSTFGPHSGQQGNTWLTAFVLKSFAQARRYMYIDSKHIQDAQLWLSSKQKENGCFRSSGMLLNNAIKGGVDDEVTLSAYITIALLEIPLPTTH…	3316	4759	1	1	1	750.355	1498.7	2	1498.7	-0.0011	0	57.46	0.00015	R	ETTYNSLLCAAEK	S
3	2::tr|A0A151NFJ9|A0A151NFJ9_ALLMI	Uncharacterized protein OS=Alligator mississippiensis OX=8496 GN=Y1Q_0018187 PE=4 SV=1	2719	84511	168	168	45	45	69	754	MPPDMKISSEETVRKYFPETWIWDLIQMDSQGNAVLTLTIPDTITEWKASAFCTSEHSGFGLSPTVSLTAFQPFFLDLTLPYSVVRGEDFPLKATVFNYLAHCIRVSVSLSPCSDFSAAPVEKEEDAYCLCENERKTVSWTVTPKSLGEVEISVSAEALNGGLPCGDKVVEALSNWRKDTIIRKLLVEPEGIPRETTYNSLLCAAEKSAPSPVSLELPQNVVPDSARAYFSVLGDILGTAMHNLHQLLQMPFGCGEQNMVLFAPXXXILDYLNKTGQLKEETKSKAVGYLVSGYQRQLIYKHSDGSYSTFGPHSGQQGNTWLTAFVLKSFAQARRYMYIDSKHIQDAQLWLSSKQKENGCFRSSGMLLNNAIKGGVDDEVTLSAYITIALLEIPLPTTH…	3324	4458	1	1	1	750.847	1499.68	2	1499.68	-0.0008	0	61.72	4.6e-05	R	ETTYNSLLCAAEK	S
3	2::tr|A0A151NFJ9|A0A151NFJ9_ALLMI	Uncharacterized protein OS=Alligator mississippiensis OX=8496 GN=Y1Q_0018187 PE=4 SV=1	2719	84511	168	168	45	45	69	754	MPPDMKISSEETVRKYFPETWIWDLIQMDSQGNAVLTLTIPDTITEWKASAFCTSEHSGFGLSPTVSLTAFQPFFLDLTLPYSVVRGEDFPLKATVFNYLAHCIRVSVSLSPCSDFSAAPVEKEEDAYCLCENERKTVSWTVTPKSLGEVEISVSAEALNGGLPCGDKVVEALSNWRKDTIIRKLLVEPEGIPRETTYNSLLCAAEKSAPSPVSLELPQNVVPDSARAYFSVLGDILGTAMHNLHQLLQMPFGCGEQNMVLFAPXXXILDYLNKTGQLKEETKSKAVGYLVSGYQRQLIYKHSDGSYSTFGPHSGQQGNTWLTAFVLKSFAQARRYMYIDSKHIQDAQLWLSSKQKENGCFRSSGMLLNNAIKGGVDDEVTLSAYITIALLEIPLPTTH…	3398	4333	1	1	1	757.885	1513.75	2	1513.76	-0.0018	0	37.69	0.019	K	EPETILPYYHPR	A
3	2::tr|A0A151NFJ9|A0A151NFJ9_ALLMI	Uncharacterized protein OS=Alligator mississippiensis OX=8496 GN=Y1Q_0018187 PE=4 SV=1	2719	84511	168	168	45	45	69	754	MPPDMKISSEETVRKYFPETWIWDLIQMDSQGNAVLTLTIPDTITEWKASAFCTSEHSGFGLSPTVSLTAFQPFFLDLTLPYSVVRGEDFPLKATVFNYLAHCIRVSVSLSPCSDFSAAPVEKEEDAYCLCENERKTVSWTVTPKSLGEVEISVSAEALNGGLPCGDKVVEALSNWRKDTIIRKLLVEPEGIPRETTYNSLLCAAEKSAPSPVSLELPQNVVPDSARAYFSVLGDILGTAMHNLHQLLQMPFGCGEQNMVLFAPXXXILDYLNKTGQLKEETKSKAVGYLVSGYQRQLIYKHSDGSYSTFGPHSGQQGNTWLTAFVLKSFAQARRYMYIDSKHIQDAQLWLSSKQKENGCFRSSGMLLNNAIKGGVDDEVTLSAYITIALLEIPLPTTH…	3399	4313	1	1	1	505.592	1513.76	3	1513.76	-0.0007	0	40.63	0.0098	K	EPETILPYYHPR	A
3	2::tr|A0A151NFJ9|A0A151NFJ9_ALLMI	Uncharacterized protein OS=Alligator mississippiensis OX=8496 GN=Y1Q_0018187 PE=4 SV=1	2719	84511	168	168	45	45	69	754	MPPDMKISSEETVRKYFPETWIWDLIQMDSQGNAVLTLTIPDTITEWKASAFCTSEHSGFGLSPTVSLTAFQPFFLDLTLPYSVVRGEDFPLKATVFNYLAHCIRVSVSLSPCSDFSAAPVEKEEDAYCLCENERKTVSWTVTPKSLGEVEISVSAEALNGGLPCGDKVVEALSNWRKDTIIRKLLVEPEGIPRETTYNSLLCAAEKSAPSPVSLELPQNVVPDSARAYFSVLGDILGTAMHNLHQLLQMPFGCGEQNMVLFAPXXXILDYLNKTGQLKEETKSKAVGYLVSGYQRQLIYKHSDGSYSTFGPHSGQQGNTWLTAFVLKSFAQARRYMYIDSKHIQDAQLWLSSKQKENGCFRSSGMLLNNAIKGGVDDEVTLSAYITIALLEIPLPTTH…	3526	4030	1	1	1	767.856	1533.7	2	1533.7	-0.0018	0	71.79	6.4e-06	K	QAQVEVYDYYEK	D
3	2::tr|A0A151NFJ9|A0A151NFJ9_ALLMI	Uncharacterized protein OS=Alligator mississippiensis OX=8496 GN=Y1Q_0018187 PE=4 SV=1	2719	84511	168	168	45	45	69	754	MPPDMKISSEETVRKYFPETWIWDLIQMDSQGNAVLTLTIPDTITEWKASAFCTSEHSGFGLSPTVSLTAFQPFFLDLTLPYSVVRGEDFPLKATVFNYLAHCIRVSVSLSPCSDFSAAPVEKEEDAYCLCENERKTVSWTVTPKSLGEVEISVSAEALNGGLPCGDKVVEALSNWRKDTIIRKLLVEPEGIPRETTYNSLLCAAEKSAPSPVSLELPQNVVPDSARAYFSVLGDILGTAMHNLHQLLQMPFGCGEQNMVLFAPXXXILDYLNKTGQLKEETKSKAVGYLVSGYQRQLIYKHSDGSYSTFGPHSGQQGNTWLTAFVLKSFAQARRYMYIDSKHIQDAQLWLSSKQKENGCFRSSGMLLNNAIKGGVDDEVTLSAYITIALLEIPLPTTH…	3533	2454	1	1	1	768.374	1534.73	2	1534.74	-0.0047	0	35.65	0.04	K	GVQQQFHVDHANR	L
3	2::tr|A0A151NFJ9|A0A151NFJ9_ALLMI	Uncharacterized protein OS=Alligator mississippiensis OX=8496 GN=Y1Q_0018187 PE=4 SV=1	2719	84511	168	168	45	45	69	754	MPPDMKISSEETVRKYFPETWIWDLIQMDSQGNAVLTLTIPDTITEWKASAFCTSEHSGFGLSPTVSLTAFQPFFLDLTLPYSVVRGEDFPLKATVFNYLAHCIRVSVSLSPCSDFSAAPVEKEEDAYCLCENERKTVSWTVTPKSLGEVEISVSAEALNGGLPCGDKVVEALSNWRKDTIIRKLLVEPEGIPRETTYNSLLCAAEKSAPSPVSLELPQNVVPDSARAYFSVLGDILGTAMHNLHQLLQMPFGCGEQNMVLFAPXXXILDYLNKTGQLKEETKSKAVGYLVSGYQRQLIYKHSDGSYSTFGPHSGQQGNTWLTAFVLKSFAQARRYMYIDSKHIQDAQLWLSSKQKENGCFRSSGMLLNNAIKGGVDDEVTLSAYITIALLEIPLPTTH…	3534	2416	1	1	1	384.691	1534.74	4	1534.74	-0.0038	0	26.16	0.36	K	GVQQQFHVDHANR	L
3	2::tr|A0A151NFJ9|A0A151NFJ9_ALLMI	Uncharacterized protein OS=Alligator mississippiensis OX=8496 GN=Y1Q_0018187 PE=4 SV=1	2719	84511	168	168	45	45	69	754	MPPDMKISSEETVRKYFPETWIWDLIQMDSQGNAVLTLTIPDTITEWKASAFCTSEHSGFGLSPTVSLTAFQPFFLDLTLPYSVVRGEDFPLKATVFNYLAHCIRVSVSLSPCSDFSAAPVEKEEDAYCLCENERKTVSWTVTPKSLGEVEISVSAEALNGGLPCGDKVVEALSNWRKDTIIRKLLVEPEGIPRETTYNSLLCAAEKSAPSPVSLELPQNVVPDSARAYFSVLGDILGTAMHNLHQLLQMPFGCGEQNMVLFAPXXXILDYLNKTGQLKEETKSKAVGYLVSGYQRQLIYKHSDGSYSTFGPHSGQQGNTWLTAFVLKSFAQARRYMYIDSKHIQDAQLWLSSKQKENGCFRSSGMLLNNAIKGGVDDEVTLSAYITIALLEIPLPTTH…	3536	2630	1	1	1	384.692	1534.74	4	1534.74	-0.0014	0	35.04	0.048	K	GVQQQFHVDHANR	L
3	2::tr|A0A151NFJ9|A0A151NFJ9_ALLMI	Uncharacterized protein OS=Alligator mississippiensis OX=8496 GN=Y1Q_0018187 PE=4 SV=1	2719	84511	168	168	45	45	69	754	MPPDMKISSEETVRKYFPETWIWDLIQMDSQGNAVLTLTIPDTITEWKASAFCTSEHSGFGLSPTVSLTAFQPFFLDLTLPYSVVRGEDFPLKATVFNYLAHCIRVSVSLSPCSDFSAAPVEKEEDAYCLCENERKTVSWTVTPKSLGEVEISVSAEALNGGLPCGDKVVEALSNWRKDTIIRKLLVEPEGIPRETTYNSLLCAAEKSAPSPVSLELPQNVVPDSARAYFSVLGDILGTAMHNLHQLLQMPFGCGEQNMVLFAPXXXILDYLNKTGQLKEETKSKAVGYLVSGYQRQLIYKHSDGSYSTFGPHSGQQGNTWLTAFVLKSFAQARRYMYIDSKHIQDAQLWLSSKQKENGCFRSSGMLLNNAIKGGVDDEVTLSAYITIALLEIPLPTTH…	3537	2515	1	1	1	384.692	1534.74	4	1534.74	-0.0011	0	39.98	0.015	K	GVQQQFHVDHANR	L
3	2::tr|A0A151NFJ9|A0A151NFJ9_ALLMI	Uncharacterized protein OS=Alligator mississippiensis OX=8496 GN=Y1Q_0018187 PE=4 SV=1	2719	84511	168	168	45	45	69	754	MPPDMKISSEETVRKYFPETWIWDLIQMDSQGNAVLTLTIPDTITEWKASAFCTSEHSGFGLSPTVSLTAFQPFFLDLTLPYSVVRGEDFPLKATVFNYLAHCIRVSVSLSPCSDFSAAPVEKEEDAYCLCENERKTVSWTVTPKSLGEVEISVSAEALNGGLPCGDKVVEALSNWRKDTIIRKLLVEPEGIPRETTYNSLLCAAEKSAPSPVSLELPQNVVPDSARAYFSVLGDILGTAMHNLHQLLQMPFGCGEQNMVLFAPXXXILDYLNKTGQLKEETKSKAVGYLVSGYQRQLIYKHSDGSYSTFGPHSGQQGNTWLTAFVLKSFAQARRYMYIDSKHIQDAQLWLSSKQKENGCFRSSGMLLNNAIKGGVDDEVTLSAYITIALLEIPLPTTH…	3538	2513	1	1	1	512.587	1534.74	3	1534.74	-0.0004	0	51.88	0.00099	K	GVQQQFHVDHANR	L
3	2::tr|A0A151NFJ9|A0A151NFJ9_ALLMI	Uncharacterized protein OS=Alligator mississippiensis OX=8496 GN=Y1Q_0018187 PE=4 SV=1	2719	84511	168	168	45	45	69	754	MPPDMKISSEETVRKYFPETWIWDLIQMDSQGNAVLTLTIPDTITEWKASAFCTSEHSGFGLSPTVSLTAFQPFFLDLTLPYSVVRGEDFPLKATVFNYLAHCIRVSVSLSPCSDFSAAPVEKEEDAYCLCENERKTVSWTVTPKSLGEVEISVSAEALNGGLPCGDKVVEALSNWRKDTIIRKLLVEPEGIPRETTYNSLLCAAEKSAPSPVSLELPQNVVPDSARAYFSVLGDILGTAMHNLHQLLQMPFGCGEQNMVLFAPXXXILDYLNKTGQLKEETKSKAVGYLVSGYQRQLIYKHSDGSYSTFGPHSGQQGNTWLTAFVLKSFAQARRYMYIDSKHIQDAQLWLSSKQKENGCFRSSGMLLNNAIKGGVDDEVTLSAYITIALLEIPLPTTH…	3539	2631	1	1	1	512.587	1534.74	3	1534.74	0.0004	0	54.04	0.00058	K	GVQQQFHVDHANR	L
3	2::tr|A0A151NFJ9|A0A151NFJ9_ALLMI	Uncharacterized protein OS=Alligator mississippiensis OX=8496 GN=Y1Q_0018187 PE=4 SV=1	2719	84511	168	168	45	45	69	754	MPPDMKISSEETVRKYFPETWIWDLIQMDSQGNAVLTLTIPDTITEWKASAFCTSEHSGFGLSPTVSLTAFQPFFLDLTLPYSVVRGEDFPLKATVFNYLAHCIRVSVSLSPCSDFSAAPVEKEEDAYCLCENERKTVSWTVTPKSLGEVEISVSAEALNGGLPCGDKVVEALSNWRKDTIIRKLLVEPEGIPRETTYNSLLCAAEKSAPSPVSLELPQNVVPDSARAYFSVLGDILGTAMHNLHQLLQMPFGCGEQNMVLFAPXXXILDYLNKTGQLKEETKSKAVGYLVSGYQRQLIYKHSDGSYSTFGPHSGQQGNTWLTAFVLKSFAQARRYMYIDSKHIQDAQLWLSSKQKENGCFRSSGMLLNNAIKGGVDDEVTLSAYITIALLEIPLPTTH…	3544	2411	1	1	1	512.921	1535.74	3	1535.72	0.0194	0	54.12	0.00053	K	GVQQQFHVDHANR	L
3	2::tr|A0A151NFJ9|A0A151NFJ9_ALLMI	Uncharacterized protein OS=Alligator mississippiensis OX=8496 GN=Y1Q_0018187 PE=4 SV=1	2719	84511	168	168	45	45	69	754	MPPDMKISSEETVRKYFPETWIWDLIQMDSQGNAVLTLTIPDTITEWKASAFCTSEHSGFGLSPTVSLTAFQPFFLDLTLPYSVVRGEDFPLKATVFNYLAHCIRVSVSLSPCSDFSAAPVEKEEDAYCLCENERKTVSWTVTPKSLGEVEISVSAEALNGGLPCGDKVVEALSNWRKDTIIRKLLVEPEGIPRETTYNSLLCAAEKSAPSPVSLELPQNVVPDSARAYFSVLGDILGTAMHNLHQLLQMPFGCGEQNMVLFAPXXXILDYLNKTGQLKEETKSKAVGYLVSGYQRQLIYKHSDGSYSTFGPHSGQQGNTWLTAFVLKSFAQARRYMYIDSKHIQDAQLWLSSKQKENGCFRSSGMLLNNAIKGGVDDEVTLSAYITIALLEIPLPTTH…	3662	6690	1	1	1	522.308	1563.9	3	1563.9	-0.0003	1	43.9	0.00092	K	ALLAYAFALAGKVEK	Q
3	2::tr|A0A151NFJ9|A0A151NFJ9_ALLMI	Uncharacterized protein OS=Alligator mississippiensis OX=8496 GN=Y1Q_0018187 PE=4 SV=1	2719	84511	168	168	45	45	69	754	MPPDMKISSEETVRKYFPETWIWDLIQMDSQGNAVLTLTIPDTITEWKASAFCTSEHSGFGLSPTVSLTAFQPFFLDLTLPYSVVRGEDFPLKATVFNYLAHCIRVSVSLSPCSDFSAAPVEKEEDAYCLCENERKTVSWTVTPKSLGEVEISVSAEALNGGLPCGDKVVEALSNWRKDTIIRKLLVEPEGIPRETTYNSLLCAAEKSAPSPVSLELPQNVVPDSARAYFSVLGDILGTAMHNLHQLLQMPFGCGEQNMVLFAPXXXILDYLNKTGQLKEETKSKAVGYLVSGYQRQLIYKHSDGSYSTFGPHSGQQGNTWLTAFVLKSFAQARRYMYIDSKHIQDAQLWLSSKQKENGCFRSSGMLLNNAIKGGVDDEVTLSAYITIALLEIPLPTTH…	3757	3123	1	1	1	794.305	1586.6	2	1586.6	-0.0024	0	61.51	3.6e-06	K	EEDAYCLCENER	K
3	2::tr|A0A151NFJ9|A0A151NFJ9_ALLMI	Uncharacterized protein OS=Alligator mississippiensis OX=8496 GN=Y1Q_0018187 PE=4 SV=1	2719	84511	168	168	45	45	69	754	MPPDMKISSEETVRKYFPETWIWDLIQMDSQGNAVLTLTIPDTITEWKASAFCTSEHSGFGLSPTVSLTAFQPFFLDLTLPYSVVRGEDFPLKATVFNYLAHCIRVSVSLSPCSDFSAAPVEKEEDAYCLCENERKTVSWTVTPKSLGEVEISVSAEALNGGLPCGDKVVEALSNWRKDTIIRKLLVEPEGIPRETTYNSLLCAAEKSAPSPVSLELPQNVVPDSARAYFSVLGDILGTAMHNLHQLLQMPFGCGEQNMVLFAPXXXILDYLNKTGQLKEETKSKAVGYLVSGYQRQLIYKHSDGSYSTFGPHSGQQGNTWLTAFVLKSFAQARRYMYIDSKHIQDAQLWLSSKQKENGCFRSSGMLLNNAIKGGVDDEVTLSAYITIALLEIPLPTTH…	4935	5025	1	1	1	940.462	1878.91	2	1878.9	0.0067	0	86.61	3.4e-07	R	VSVSLSPCSDFSAAPVEK	E
3	2::tr|A0A151NFJ9|A0A151NFJ9_ALLMI	Uncharacterized protein OS=Alligator mississippiensis OX=8496 GN=Y1Q_0018187 PE=4 SV=1	2719	84511	168	168	45	45	69	754	MPPDMKISSEETVRKYFPETWIWDLIQMDSQGNAVLTLTIPDTITEWKASAFCTSEHSGFGLSPTVSLTAFQPFFLDLTLPYSVVRGEDFPLKATVFNYLAHCIRVSVSLSPCSDFSAAPVEKEEDAYCLCENERKTVSWTVTPKSLGEVEISVSAEALNGGLPCGDKVVEALSNWRKDTIIRKLLVEPEGIPRETTYNSLLCAAEKSAPSPVSLELPQNVVPDSARAYFSVLGDILGTAMHNLHQLLQMPFGCGEQNMVLFAPXXXILDYLNKTGQLKEETKSKAVGYLVSGYQRQLIYKHSDGSYSTFGPHSGQQGNTWLTAFVLKSFAQARRYMYIDSKHIQDAQLWLSSKQKENGCFRSSGMLLNNAIKGGVDDEVTLSAYITIALLEIPLPTTH…	5033	5822	1	1	1	952.94	1903.87	2	1903.87	-0.0005	0	68.86	1.4e-05	K	DEFAIAEYQAPCYTVK	A
3	2::tr|A0A151NFJ9|A0A151NFJ9_ALLMI	Uncharacterized protein OS=Alligator mississippiensis OX=8496 GN=Y1Q_0018187 PE=4 SV=1	2719	84511	168	168	45	45	69	754	MPPDMKISSEETVRKYFPETWIWDLIQMDSQGNAVLTLTIPDTITEWKASAFCTSEHSGFGLSPTVSLTAFQPFFLDLTLPYSVVRGEDFPLKATVFNYLAHCIRVSVSLSPCSDFSAAPVEKEEDAYCLCENERKTVSWTVTPKSLGEVEISVSAEALNGGLPCGDKVVEALSNWRKDTIIRKLLVEPEGIPRETTYNSLLCAAEKSAPSPVSLELPQNVVPDSARAYFSVLGDILGTAMHNLHQLLQMPFGCGEQNMVLFAPXXXILDYLNKTGQLKEETKSKAVGYLVSGYQRQLIYKHSDGSYSTFGPHSGQQGNTWLTAFVLKSFAQARRYMYIDSKHIQDAQLWLSSKQKENGCFRSSGMLLNNAIKGGVDDEVTLSAYITIALLEIPLPTTH…	5297	6950	1	1	1	1004.95	2007.89	2	2007.9	-0.0108	0	79.38	1.1e-06	K	YSMAVTGDGCVYTQTSLR	Y
3	2::tr|A0A151NFJ9|A0A151NFJ9_ALLMI	Uncharacterized protein OS=Alligator mississippiensis OX=8496 GN=Y1Q_0018187 PE=4 SV=1	2719	84511	168	168	45	45	69	754	MPPDMKISSEETVRKYFPETWIWDLIQMDSQGNAVLTLTIPDTITEWKASAFCTSEHSGFGLSPTVSLTAFQPFFLDLTLPYSVVRGEDFPLKATVFNYLAHCIRVSVSLSPCSDFSAAPVEKEEDAYCLCENERKTVSWTVTPKSLGEVEISVSAEALNGGLPCGDKVVEALSNWRKDTIIRKLLVEPEGIPRETTYNSLLCAAEKSAPSPVSLELPQNVVPDSARAYFSVLGDILGTAMHNLHQLLQMPFGCGEQNMVLFAPXXXILDYLNKTGQLKEETKSKAVGYLVSGYQRQLIYKHSDGSYSTFGPHSGQQGNTWLTAFVLKSFAQARRYMYIDSKHIQDAQLWLSSKQKENGCFRSSGMLLNNAIKGGVDDEVTLSAYITIALLEIPLPTTH…	5299	6422	1	1	1	1004.95	2007.89	2	2007.9	-0.0088	0	80.03	9.8e-07	K	YSMAVTGDGCVYTQTSLR	Y
3	2::tr|A0A151NFJ9|A0A151NFJ9_ALLMI	Uncharacterized protein OS=Alligator mississippiensis OX=8496 GN=Y1Q_0018187 PE=4 SV=1	2719	84511	168	168	45	45	69	754	MPPDMKISSEETVRKYFPETWIWDLIQMDSQGNAVLTLTIPDTITEWKASAFCTSEHSGFGLSPTVSLTAFQPFFLDLTLPYSVVRGEDFPLKATVFNYLAHCIRVSVSLSPCSDFSAAPVEKEEDAYCLCENERKTVSWTVTPKSLGEVEISVSAEALNGGLPCGDKVVEALSNWRKDTIIRKLLVEPEGIPRETTYNSLLCAAEKSAPSPVSLELPQNVVPDSARAYFSVLGDILGTAMHNLHQLLQMPFGCGEQNMVLFAPXXXILDYLNKTGQLKEETKSKAVGYLVSGYQRQLIYKHSDGSYSTFGPHSGQQGNTWLTAFVLKSFAQARRYMYIDSKHIQDAQLWLSSKQKENGCFRSSGMLLNNAIKGGVDDEVTLSAYITIALLEIPLPTTH…	5300	5786	1	1	1	1004.96	2007.9	2	2007.9	-0.0042	0	71.24	7.8e-06	K	YSMAVTGDGCVYTQTSLR	Y
3	2::tr|A0A151NFJ9|A0A151NFJ9_ALLMI	Uncharacterized protein OS=Alligator mississippiensis OX=8496 GN=Y1Q_0018187 PE=4 SV=1	2719	84511	168	168	45	45	69	754	MPPDMKISSEETVRKYFPETWIWDLIQMDSQGNAVLTLTIPDTITEWKASAFCTSEHSGFGLSPTVSLTAFQPFFLDLTLPYSVVRGEDFPLKATVFNYLAHCIRVSVSLSPCSDFSAAPVEKEEDAYCLCENERKTVSWTVTPKSLGEVEISVSAEALNGGLPCGDKVVEALSNWRKDTIIRKLLVEPEGIPRETTYNSLLCAAEKSAPSPVSLELPQNVVPDSARAYFSVLGDILGTAMHNLHQLLQMPFGCGEQNMVLFAPXXXILDYLNKTGQLKEETKSKAVGYLVSGYQRQLIYKHSDGSYSTFGPHSGQQGNTWLTAFVLKSFAQARRYMYIDSKHIQDAQLWLSSKQKENGCFRSSGMLLNNAIKGGVDDEVTLSAYITIALLEIPLPTTH…	5301	4970	1	1	1	1004.96	2007.9	2	2007.9	-0.0041	0	102	6.5e-09	K	YSMAVTGDGCVYTQTSLR	Y
3	2::tr|A0A151NFJ9|A0A151NFJ9_ALLMI	Uncharacterized protein OS=Alligator mississippiensis OX=8496 GN=Y1Q_0018187 PE=4 SV=1	2719	84511	168	168	45	45	69	754	MPPDMKISSEETVRKYFPETWIWDLIQMDSQGNAVLTLTIPDTITEWKASAFCTSEHSGFGLSPTVSLTAFQPFFLDLTLPYSVVRGEDFPLKATVFNYLAHCIRVSVSLSPCSDFSAAPVEKEEDAYCLCENERKTVSWTVTPKSLGEVEISVSAEALNGGLPCGDKVVEALSNWRKDTIIRKLLVEPEGIPRETTYNSLLCAAEKSAPSPVSLELPQNVVPDSARAYFSVLGDILGTAMHNLHQLLQMPFGCGEQNMVLFAPXXXILDYLNKTGQLKEETKSKAVGYLVSGYQRQLIYKHSDGSYSTFGPHSGQQGNTWLTAFVLKSFAQARRYMYIDSKHIQDAQLWLSSKQKENGCFRSSGMLLNNAIKGGVDDEVTLSAYITIALLEIPLPTTH…	5302	5258	1	1	1	1004.96	2007.9	2	2007.9	-0.0038	0	61.38	7.7e-05	K	YSMAVTGDGCVYTQTSLR	Y
3	2::tr|A0A151NFJ9|A0A151NFJ9_ALLMI	Uncharacterized protein OS=Alligator mississippiensis OX=8496 GN=Y1Q_0018187 PE=4 SV=1	2719	84511	168	168	45	45	69	754	MPPDMKISSEETVRKYFPETWIWDLIQMDSQGNAVLTLTIPDTITEWKASAFCTSEHSGFGLSPTVSLTAFQPFFLDLTLPYSVVRGEDFPLKATVFNYLAHCIRVSVSLSPCSDFSAAPVEKEEDAYCLCENERKTVSWTVTPKSLGEVEISVSAEALNGGLPCGDKVVEALSNWRKDTIIRKLLVEPEGIPRETTYNSLLCAAEKSAPSPVSLELPQNVVPDSARAYFSVLGDILGTAMHNLHQLLQMPFGCGEQNMVLFAPXXXILDYLNKTGQLKEETKSKAVGYLVSGYQRQLIYKHSDGSYSTFGPHSGQQGNTWLTAFVLKSFAQARRYMYIDSKHIQDAQLWLSSKQKENGCFRSSGMLLNNAIKGGVDDEVTLSAYITIALLEIPLPTTH…	5303	7550	1	1	1	1004.96	2007.9	2	2007.9	-0.0036	0	31.32	0.078	K	YSMAVTGDGCVYTQTSLR	Y
3	2::tr|A0A151NFJ9|A0A151NFJ9_ALLMI	Uncharacterized protein OS=Alligator mississippiensis OX=8496 GN=Y1Q_0018187 PE=4 SV=1	2719	84511	168	168	45	45	69	754	MPPDMKISSEETVRKYFPETWIWDLIQMDSQGNAVLTLTIPDTITEWKASAFCTSEHSGFGLSPTVSLTAFQPFFLDLTLPYSVVRGEDFPLKATVFNYLAHCIRVSVSLSPCSDFSAAPVEKEEDAYCLCENERKTVSWTVTPKSLGEVEISVSAEALNGGLPCGDKVVEALSNWRKDTIIRKLLVEPEGIPRETTYNSLLCAAEKSAPSPVSLELPQNVVPDSARAYFSVLGDILGTAMHNLHQLLQMPFGCGEQNMVLFAPXXXILDYLNKTGQLKEETKSKAVGYLVSGYQRQLIYKHSDGSYSTFGPHSGQQGNTWLTAFVLKSFAQARRYMYIDSKHIQDAQLWLSSKQKENGCFRSSGMLLNNAIKGGVDDEVTLSAYITIALLEIPLPTTH…	5305	5096	1	1	1	1004.96	2007.9	2	2007.9	-0.0029	0	89.35	1.2e-07	K	YSMAVTGDGCVYTQTSLR	Y
3	2::tr|A0A151NFJ9|A0A151NFJ9_ALLMI	Uncharacterized protein OS=Alligator mississippiensis OX=8496 GN=Y1Q_0018187 PE=4 SV=1	2719	84511	168	168	45	45	69	754	MPPDMKISSEETVRKYFPETWIWDLIQMDSQGNAVLTLTIPDTITEWKASAFCTSEHSGFGLSPTVSLTAFQPFFLDLTLPYSVVRGEDFPLKATVFNYLAHCIRVSVSLSPCSDFSAAPVEKEEDAYCLCENERKTVSWTVTPKSLGEVEISVSAEALNGGLPCGDKVVEALSNWRKDTIIRKLLVEPEGIPRETTYNSLLCAAEKSAPSPVSLELPQNVVPDSARAYFSVLGDILGTAMHNLHQLLQMPFGCGEQNMVLFAPXXXILDYLNKTGQLKEETKSKAVGYLVSGYQRQLIYKHSDGSYSTFGPHSGQQGNTWLTAFVLKSFAQARRYMYIDSKHIQDAQLWLSSKQKENGCFRSSGMLLNNAIKGGVDDEVTLSAYITIALLEIPLPTTH…	5306	4614	1	1	1	670.308	2007.9	3	2007.9	-0.0024	0	33.61	0.047	K	YSMAVTGDGCVYTQTSLR	Y
3	2::tr|A0A151NFJ9|A0A151NFJ9_ALLMI	Uncharacterized protein OS=Alligator mississippiensis OX=8496 GN=Y1Q_0018187 PE=4 SV=1	2719	84511	168	168	45	45	69	754	MPPDMKISSEETVRKYFPETWIWDLIQMDSQGNAVLTLTIPDTITEWKASAFCTSEHSGFGLSPTVSLTAFQPFFLDLTLPYSVVRGEDFPLKATVFNYLAHCIRVSVSLSPCSDFSAAPVEKEEDAYCLCENERKTVSWTVTPKSLGEVEISVSAEALNGGLPCGDKVVEALSNWRKDTIIRKLLVEPEGIPRETTYNSLLCAAEKSAPSPVSLELPQNVVPDSARAYFSVLGDILGTAMHNLHQLLQMPFGCGEQNMVLFAPXXXILDYLNKTGQLKEETKSKAVGYLVSGYQRQLIYKHSDGSYSTFGPHSGQQGNTWLTAFVLKSFAQARRYMYIDSKHIQDAQLWLSSKQKENGCFRSSGMLLNNAIKGGVDDEVTLSAYITIALLEIPLPTTH…	5308	4841	1	1	1	1004.96	2007.9	2	2007.9	-0.0023	0	90.4	9.8e-08	K	YSMAVTGDGCVYTQTSLR	Y
3	2::tr|A0A151NFJ9|A0A151NFJ9_ALLMI	Uncharacterized protein OS=Alligator mississippiensis OX=8496 GN=Y1Q_0018187 PE=4 SV=1	2719	84511	168	168	45	45	69	754	MPPDMKISSEETVRKYFPETWIWDLIQMDSQGNAVLTLTIPDTITEWKASAFCTSEHSGFGLSPTVSLTAFQPFFLDLTLPYSVVRGEDFPLKATVFNYLAHCIRVSVSLSPCSDFSAAPVEKEEDAYCLCENERKTVSWTVTPKSLGEVEISVSAEALNGGLPCGDKVVEALSNWRKDTIIRKLLVEPEGIPRETTYNSLLCAAEKSAPSPVSLELPQNVVPDSARAYFSVLGDILGTAMHNLHQLLQMPFGCGEQNMVLFAPXXXILDYLNKTGQLKEETKSKAVGYLVSGYQRQLIYKHSDGSYSTFGPHSGQQGNTWLTAFVLKSFAQARRYMYIDSKHIQDAQLWLSSKQKENGCFRSSGMLLNNAIKGGVDDEVTLSAYITIALLEIPLPTTH…	5310	6685	1	1	1	1004.96	2007.9	2	2007.9	-0.0022	0	86.17	2.6e-07	K	YSMAVTGDGCVYTQTSLR	Y
3	2::tr|A0A151NFJ9|A0A151NFJ9_ALLMI	Uncharacterized protein OS=Alligator mississippiensis OX=8496 GN=Y1Q_0018187 PE=4 SV=1	2719	84511	168	168	45	45	69	754	MPPDMKISSEETVRKYFPETWIWDLIQMDSQGNAVLTLTIPDTITEWKASAFCTSEHSGFGLSPTVSLTAFQPFFLDLTLPYSVVRGEDFPLKATVFNYLAHCIRVSVSLSPCSDFSAAPVEKEEDAYCLCENERKTVSWTVTPKSLGEVEISVSAEALNGGLPCGDKVVEALSNWRKDTIIRKLLVEPEGIPRETTYNSLLCAAEKSAPSPVSLELPQNVVPDSARAYFSVLGDILGTAMHNLHQLLQMPFGCGEQNMVLFAPXXXILDYLNKTGQLKEETKSKAVGYLVSGYQRQLIYKHSDGSYSTFGPHSGQQGNTWLTAFVLKSFAQARRYMYIDSKHIQDAQLWLSSKQKENGCFRSSGMLLNNAIKGGVDDEVTLSAYITIALLEIPLPTTH…	5311	5636	1	1	1	1004.96	2007.9	2	2007.9	-0.0021	0	85.32	3.2e-07	K	YSMAVTGDGCVYTQTSLR	Y
3	2::tr|A0A151NFJ9|A0A151NFJ9_ALLMI	Uncharacterized protein OS=Alligator mississippiensis OX=8496 GN=Y1Q_0018187 PE=4 SV=1	2719	84511	168	168	45	45	69	754	MPPDMKISSEETVRKYFPETWIWDLIQMDSQGNAVLTLTIPDTITEWKASAFCTSEHSGFGLSPTVSLTAFQPFFLDLTLPYSVVRGEDFPLKATVFNYLAHCIRVSVSLSPCSDFSAAPVEKEEDAYCLCENERKTVSWTVTPKSLGEVEISVSAEALNGGLPCGDKVVEALSNWRKDTIIRKLLVEPEGIPRETTYNSLLCAAEKSAPSPVSLELPQNVVPDSARAYFSVLGDILGTAMHNLHQLLQMPFGCGEQNMVLFAPXXXILDYLNKTGQLKEETKSKAVGYLVSGYQRQLIYKHSDGSYSTFGPHSGQQGNTWLTAFVLKSFAQARRYMYIDSKHIQDAQLWLSSKQKENGCFRSSGMLLNNAIKGGVDDEVTLSAYITIALLEIPLPTTH…	5312	4718	1	1	1	1004.96	2007.9	2	2007.9	-0.0021	0	90.4	9.8e-08	K	YSMAVTGDGCVYTQTSLR	Y
3	2::tr|A0A151NFJ9|A0A151NFJ9_ALLMI	Uncharacterized protein OS=Alligator mississippiensis OX=8496 GN=Y1Q_0018187 PE=4 SV=1	2719	84511	168	168	45	45	69	754	MPPDMKISSEETVRKYFPETWIWDLIQMDSQGNAVLTLTIPDTITEWKASAFCTSEHSGFGLSPTVSLTAFQPFFLDLTLPYSVVRGEDFPLKATVFNYLAHCIRVSVSLSPCSDFSAAPVEKEEDAYCLCENERKTVSWTVTPKSLGEVEISVSAEALNGGLPCGDKVVEALSNWRKDTIIRKLLVEPEGIPRETTYNSLLCAAEKSAPSPVSLELPQNVVPDSARAYFSVLGDILGTAMHNLHQLLQMPFGCGEQNMVLFAPXXXILDYLNKTGQLKEETKSKAVGYLVSGYQRQLIYKHSDGSYSTFGPHSGQQGNTWLTAFVLKSFAQARRYMYIDSKHIQDAQLWLSSKQKENGCFRSSGMLLNNAIKGGVDDEVTLSAYITIALLEIPLPTTH…	5313	6713	1	1	1	670.308	2007.9	3	2007.9	-0.0018	0	30.76	0.09	K	YSMAVTGDGCVYTQTSLR	Y
3	2::tr|A0A151NFJ9|A0A151NFJ9_ALLMI	Uncharacterized protein OS=Alligator mississippiensis OX=8496 GN=Y1Q_0018187 PE=4 SV=1	2719	84511	168	168	45	45	69	754	MPPDMKISSEETVRKYFPETWIWDLIQMDSQGNAVLTLTIPDTITEWKASAFCTSEHSGFGLSPTVSLTAFQPFFLDLTLPYSVVRGEDFPLKATVFNYLAHCIRVSVSLSPCSDFSAAPVEKEEDAYCLCENERKTVSWTVTPKSLGEVEISVSAEALNGGLPCGDKVVEALSNWRKDTIIRKLLVEPEGIPRETTYNSLLCAAEKSAPSPVSLELPQNVVPDSARAYFSVLGDILGTAMHNLHQLLQMPFGCGEQNMVLFAPXXXILDYLNKTGQLKEETKSKAVGYLVSGYQRQLIYKHSDGSYSTFGPHSGQQGNTWLTAFVLKSFAQARRYMYIDSKHIQDAQLWLSSKQKENGCFRSSGMLLNNAIKGGVDDEVTLSAYITIALLEIPLPTTH…	5314	5370	1	1	1	1004.96	2007.9	2	2007.9	-0.0018	0	70.06	1.1e-05	K	YSMAVTGDGCVYTQTSLR	Y
3	2::tr|A0A151NFJ9|A0A151NFJ9_ALLMI	Uncharacterized protein OS=Alligator mississippiensis OX=8496 GN=Y1Q_0018187 PE=4 SV=1	2719	84511	168	168	45	45	69	754	MPPDMKISSEETVRKYFPETWIWDLIQMDSQGNAVLTLTIPDTITEWKASAFCTSEHSGFGLSPTVSLTAFQPFFLDLTLPYSVVRGEDFPLKATVFNYLAHCIRVSVSLSPCSDFSAAPVEKEEDAYCLCENERKTVSWTVTPKSLGEVEISVSAEALNGGLPCGDKVVEALSNWRKDTIIRKLLVEPEGIPRETTYNSLLCAAEKSAPSPVSLELPQNVVPDSARAYFSVLGDILGTAMHNLHQLLQMPFGCGEQNMVLFAPXXXILDYLNKTGQLKEETKSKAVGYLVSGYQRQLIYKHSDGSYSTFGPHSGQQGNTWLTAFVLKSFAQARRYMYIDSKHIQDAQLWLSSKQKENGCFRSSGMLLNNAIKGGVDDEVTLSAYITIALLEIPLPTTH…	5315	4891	1	1	1	670.308	2007.9	3	2007.9	-0.0015	0	28.52	0.15	K	YSMAVTGDGCVYTQTSLR	Y
3	2::tr|A0A151NFJ9|A0A151NFJ9_ALLMI	Uncharacterized protein OS=Alligator mississippiensis OX=8496 GN=Y1Q_0018187 PE=4 SV=1	2719	84511	168	168	45	45	69	754	MPPDMKISSEETVRKYFPETWIWDLIQMDSQGNAVLTLTIPDTITEWKASAFCTSEHSGFGLSPTVSLTAFQPFFLDLTLPYSVVRGEDFPLKATVFNYLAHCIRVSVSLSPCSDFSAAPVEKEEDAYCLCENERKTVSWTVTPKSLGEVEISVSAEALNGGLPCGDKVVEALSNWRKDTIIRKLLVEPEGIPRETTYNSLLCAAEKSAPSPVSLELPQNVVPDSARAYFSVLGDILGTAMHNLHQLLQMPFGCGEQNMVLFAPXXXILDYLNKTGQLKEETKSKAVGYLVSGYQRQLIYKHSDGSYSTFGPHSGQQGNTWLTAFVLKSFAQARRYMYIDSKHIQDAQLWLSSKQKENGCFRSSGMLLNNAIKGGVDDEVTLSAYITIALLEIPLPTTH…	5316	6551	1	1	1	1004.96	2007.9	2	2007.9	-0.0003	0	91.29	8.4e-08	K	YSMAVTGDGCVYTQTSLR	Y
3	2::tr|A0A151NFJ9|A0A151NFJ9_ALLMI	Uncharacterized protein OS=Alligator mississippiensis OX=8496 GN=Y1Q_0018187 PE=4 SV=1	2719	84511	168	168	45	45	69	754	MPPDMKISSEETVRKYFPETWIWDLIQMDSQGNAVLTLTIPDTITEWKASAFCTSEHSGFGLSPTVSLTAFQPFFLDLTLPYSVVRGEDFPLKATVFNYLAHCIRVSVSLSPCSDFSAAPVEKEEDAYCLCENERKTVSWTVTPKSLGEVEISVSAEALNGGLPCGDKVVEALSNWRKDTIIRKLLVEPEGIPRETTYNSLLCAAEKSAPSPVSLELPQNVVPDSARAYFSVLGDILGTAMHNLHQLLQMPFGCGEQNMVLFAPXXXILDYLNKTGQLKEETKSKAVGYLVSGYQRQLIYKHSDGSYSTFGPHSGQQGNTWLTAFVLKSFAQARRYMYIDSKHIQDAQLWLSSKQKENGCFRSSGMLLNNAIKGGVDDEVTLSAYITIALLEIPLPTTH…	5317	6116	1	1	1	1004.96	2007.9	2	2007.9	0.0005	0	52.91	0.00057	K	YSMAVTGDGCVYTQTSLR	Y
3	2::tr|A0A151NFJ9|A0A151NFJ9_ALLMI	Uncharacterized protein OS=Alligator mississippiensis OX=8496 GN=Y1Q_0018187 PE=4 SV=1	2719	84511	168	168	45	45	69	754	MPPDMKISSEETVRKYFPETWIWDLIQMDSQGNAVLTLTIPDTITEWKASAFCTSEHSGFGLSPTVSLTAFQPFFLDLTLPYSVVRGEDFPLKATVFNYLAHCIRVSVSLSPCSDFSAAPVEKEEDAYCLCENERKTVSWTVTPKSLGEVEISVSAEALNGGLPCGDKVVEALSNWRKDTIIRKLLVEPEGIPRETTYNSLLCAAEKSAPSPVSLELPQNVVPDSARAYFSVLGDILGTAMHNLHQLLQMPFGCGEQNMVLFAPXXXILDYLNKTGQLKEETKSKAVGYLVSGYQRQLIYKHSDGSYSTFGPHSGQQGNTWLTAFVLKSFAQARRYMYIDSKHIQDAQLWLSSKQKENGCFRSSGMLLNNAIKGGVDDEVTLSAYITIALLEIPLPTTH…	5318	6821	1	1	1	1004.96	2007.9	2	2007.9	0.0006	0	90.38	1e-07	K	YSMAVTGDGCVYTQTSLR	Y
3	2::tr|A0A151NFJ9|A0A151NFJ9_ALLMI	Uncharacterized protein OS=Alligator mississippiensis OX=8496 GN=Y1Q_0018187 PE=4 SV=1	2719	84511	168	168	45	45	69	754	MPPDMKISSEETVRKYFPETWIWDLIQMDSQGNAVLTLTIPDTITEWKASAFCTSEHSGFGLSPTVSLTAFQPFFLDLTLPYSVVRGEDFPLKATVFNYLAHCIRVSVSLSPCSDFSAAPVEKEEDAYCLCENERKTVSWTVTPKSLGEVEISVSAEALNGGLPCGDKVVEALSNWRKDTIIRKLLVEPEGIPRETTYNSLLCAAEKSAPSPVSLELPQNVVPDSARAYFSVLGDILGTAMHNLHQLLQMPFGCGEQNMVLFAPXXXILDYLNKTGQLKEETKSKAVGYLVSGYQRQLIYKHSDGSYSTFGPHSGQQGNTWLTAFVLKSFAQARRYMYIDSKHIQDAQLWLSSKQKENGCFRSSGMLLNNAIKGGVDDEVTLSAYITIALLEIPLPTTH…	5319	7079	1	1	1	1004.96	2007.9	2	2007.9	0.0011	0	94.66	3.9e-08	K	YSMAVTGDGCVYTQTSLR	Y
3	2::tr|A0A151NFJ9|A0A151NFJ9_ALLMI	Uncharacterized protein OS=Alligator mississippiensis OX=8496 GN=Y1Q_0018187 PE=4 SV=1	2719	84511	168	168	45	45	69	754	MPPDMKISSEETVRKYFPETWIWDLIQMDSQGNAVLTLTIPDTITEWKASAFCTSEHSGFGLSPTVSLTAFQPFFLDLTLPYSVVRGEDFPLKATVFNYLAHCIRVSVSLSPCSDFSAAPVEKEEDAYCLCENERKTVSWTVTPKSLGEVEISVSAEALNGGLPCGDKVVEALSNWRKDTIIRKLLVEPEGIPRETTYNSLLCAAEKSAPSPVSLELPQNVVPDSARAYFSVLGDILGTAMHNLHQLLQMPFGCGEQNMVLFAPXXXILDYLNKTGQLKEETKSKAVGYLVSGYQRQLIYKHSDGSYSTFGPHSGQQGNTWLTAFVLKSFAQARRYMYIDSKHIQDAQLWLSSKQKENGCFRSSGMLLNNAIKGGVDDEVTLSAYITIALLEIPLPTTH…	5321	5500	1	1	1	1004.96	2007.91	2	2007.9	0.0064	0	47.38	0.0021	K	YSMAVTGDGCVYTQTSLR	Y
3	2::tr|A0A151NFJ9|A0A151NFJ9_ALLMI	Uncharacterized protein OS=Alligator mississippiensis OX=8496 GN=Y1Q_0018187 PE=4 SV=1	2719	84511	168	168	45	45	69	754	MPPDMKISSEETVRKYFPETWIWDLIQMDSQGNAVLTLTIPDTITEWKASAFCTSEHSGFGLSPTVSLTAFQPFFLDLTLPYSVVRGEDFPLKATVFNYLAHCIRVSVSLSPCSDFSAAPVEKEEDAYCLCENERKTVSWTVTPKSLGEVEISVSAEALNGGLPCGDKVVEALSNWRKDTIIRKLLVEPEGIPRETTYNSLLCAAEKSAPSPVSLELPQNVVPDSARAYFSVLGDILGTAMHNLHQLLQMPFGCGEQNMVLFAPXXXILDYLNKTGQLKEETKSKAVGYLVSGYQRQLIYKHSDGSYSTFGPHSGQQGNTWLTAFVLKSFAQARRYMYIDSKHIQDAQLWLSSKQKENGCFRSSGMLLNNAIKGGVDDEVTLSAYITIALLEIPLPTTH…	5322	5923	1	1	1	1004.96	2007.91	2	2007.9	0.0077	0	89.61	1.3e-07	K	YSMAVTGDGCVYTQTSLR	Y
3	2::tr|A0A151NFJ9|A0A151NFJ9_ALLMI	Uncharacterized protein OS=Alligator mississippiensis OX=8496 GN=Y1Q_0018187 PE=4 SV=1	2719	84511	168	168	45	45	69	754	MPPDMKISSEETVRKYFPETWIWDLIQMDSQGNAVLTLTIPDTITEWKASAFCTSEHSGFGLSPTVSLTAFQPFFLDLTLPYSVVRGEDFPLKATVFNYLAHCIRVSVSLSPCSDFSAAPVEKEEDAYCLCENERKTVSWTVTPKSLGEVEISVSAEALNGGLPCGDKVVEALSNWRKDTIIRKLLVEPEGIPRETTYNSLLCAAEKSAPSPVSLELPQNVVPDSARAYFSVLGDILGTAMHNLHQLLQMPFGCGEQNMVLFAPXXXILDYLNKTGQLKEETKSKAVGYLVSGYQRQLIYKHSDGSYSTFGPHSGQQGNTWLTAFVLKSFAQARRYMYIDSKHIQDAQLWLSSKQKENGCFRSSGMLLNNAIKGGVDDEVTLSAYITIALLEIPLPTTH…	5324	6287	1	1	1	1005.46	2008.9	2	2008.89	0.013	0	37.26	0.02	K	YSMAVTGDGCVYTQTSLR	Y
3	2::tr|A0A151NFJ9|A0A151NFJ9_ALLMI	Uncharacterized protein OS=Alligator mississippiensis OX=8496 GN=Y1Q_0018187 PE=4 SV=1	2719	84511	168	168	45	45	69	754	MPPDMKISSEETVRKYFPETWIWDLIQMDSQGNAVLTLTIPDTITEWKASAFCTSEHSGFGLSPTVSLTAFQPFFLDLTLPYSVVRGEDFPLKATVFNYLAHCIRVSVSLSPCSDFSAAPVEKEEDAYCLCENERKTVSWTVTPKSLGEVEISVSAEALNGGLPCGDKVVEALSNWRKDTIIRKLLVEPEGIPRETTYNSLLCAAEKSAPSPVSLELPQNVVPDSARAYFSVLGDILGTAMHNLHQLLQMPFGCGEQNMVLFAPXXXILDYLNKTGQLKEETKSKAVGYLVSGYQRQLIYKHSDGSYSTFGPHSGQQGNTWLTAFVLKSFAQARRYMYIDSKHIQDAQLWLSSKQKENGCFRSSGMLLNNAIKGGVDDEVTLSAYITIALLEIPLPTTH…	5328	4596	1	1	1	1005.46	2008.9	2	2008.89	0.0172	0	79.92	1.1e-06	K	YSMAVTGDGCVYTQTSLR	Y
3	2::tr|A0A151NFJ9|A0A151NFJ9_ALLMI	Uncharacterized protein OS=Alligator mississippiensis OX=8496 GN=Y1Q_0018187 PE=4 SV=1	2719	84511	168	168	45	45	69	754	MPPDMKISSEETVRKYFPETWIWDLIQMDSQGNAVLTLTIPDTITEWKASAFCTSEHSGFGLSPTVSLTAFQPFFLDLTLPYSVVRGEDFPLKATVFNYLAHCIRVSVSLSPCSDFSAAPVEKEEDAYCLCENERKTVSWTVTPKSLGEVEISVSAEALNGGLPCGDKVVEALSNWRKDTIIRKLLVEPEGIPRETTYNSLLCAAEKSAPSPVSLELPQNVVPDSARAYFSVLGDILGTAMHNLHQLLQMPFGCGEQNMVLFAPXXXILDYLNKTGQLKEETKSKAVGYLVSGYQRQLIYKHSDGSYSTFGPHSGQQGNTWLTAFVLKSFAQARRYMYIDSKHIQDAQLWLSSKQKENGCFRSSGMLLNNAIKGGVDDEVTLSAYITIALLEIPLPTTH…	5371	3916	1	1	1	1012.95	2023.9	2	2023.9	-0.0028	0	37.06	0.017	K	YSMAVTGDGCVYTQTSLR	Y
3	2::tr|A0A151NFJ9|A0A151NFJ9_ALLMI	Uncharacterized protein OS=Alligator mississippiensis OX=8496 GN=Y1Q_0018187 PE=4 SV=1	2719	84511	168	168	45	45	69	754	MPPDMKISSEETVRKYFPETWIWDLIQMDSQGNAVLTLTIPDTITEWKASAFCTSEHSGFGLSPTVSLTAFQPFFLDLTLPYSVVRGEDFPLKATVFNYLAHCIRVSVSLSPCSDFSAAPVEKEEDAYCLCENERKTVSWTVTPKSLGEVEISVSAEALNGGLPCGDKVVEALSNWRKDTIIRKLLVEPEGIPRETTYNSLLCAAEKSAPSPVSLELPQNVVPDSARAYFSVLGDILGTAMHNLHQLLQMPFGCGEQNMVLFAPXXXILDYLNKTGQLKEETKSKAVGYLVSGYQRQLIYKHSDGSYSTFGPHSGQQGNTWLTAFVLKSFAQARRYMYIDSKHIQDAQLWLSSKQKENGCFRSSGMLLNNAIKGGVDDEVTLSAYITIALLEIPLPTTH…	5372	3768	1	1	1	1012.96	2023.9	2	2023.9	-0.0019	0	85.16	2.6e-07	K	YSMAVTGDGCVYTQTSLR	Y
3	2::tr|A0A151NFJ9|A0A151NFJ9_ALLMI	Uncharacterized protein OS=Alligator mississippiensis OX=8496 GN=Y1Q_0018187 PE=4 SV=1	2719	84511	168	168	45	45	69	754	MPPDMKISSEETVRKYFPETWIWDLIQMDSQGNAVLTLTIPDTITEWKASAFCTSEHSGFGLSPTVSLTAFQPFFLDLTLPYSVVRGEDFPLKATVFNYLAHCIRVSVSLSPCSDFSAAPVEKEEDAYCLCENERKTVSWTVTPKSLGEVEISVSAEALNGGLPCGDKVVEALSNWRKDTIIRKLLVEPEGIPRETTYNSLLCAAEKSAPSPVSLELPQNVVPDSARAYFSVLGDILGTAMHNLHQLLQMPFGCGEQNMVLFAPXXXILDYLNKTGQLKEETKSKAVGYLVSGYQRQLIYKHSDGSYSTFGPHSGQQGNTWLTAFVLKSFAQARRYMYIDSKHIQDAQLWLSSKQKENGCFRSSGMLLNNAIKGGVDDEVTLSAYITIALLEIPLPTTH…	5373	4863	1	1	1	507.019	2024.05	4	2024.05	-0.0025	1	45.46	0.0035	K	RPEKEPETILPYYHPR	A
3	2::tr|A0A151NFJ9|A0A151NFJ9_ALLMI	Uncharacterized protein OS=Alligator mississippiensis OX=8496 GN=Y1Q_0018187 PE=4 SV=1	2719	84511	168	168	45	45	69	754	MPPDMKISSEETVRKYFPETWIWDLIQMDSQGNAVLTLTIPDTITEWKASAFCTSEHSGFGLSPTVSLTAFQPFFLDLTLPYSVVRGEDFPLKATVFNYLAHCIRVSVSLSPCSDFSAAPVEKEEDAYCLCENERKTVSWTVTPKSLGEVEISVSAEALNGGLPCGDKVVEALSNWRKDTIIRKLLVEPEGIPRETTYNSLLCAAEKSAPSPVSLELPQNVVPDSARAYFSVLGDILGTAMHNLHQLLQMPFGCGEQNMVLFAPXXXILDYLNKTGQLKEETKSKAVGYLVSGYQRQLIYKHSDGSYSTFGPHSGQQGNTWLTAFVLKSFAQARRYMYIDSKHIQDAQLWLSSKQKENGCFRSSGMLLNNAIKGGVDDEVTLSAYITIALLEIPLPTTH…	5374	5344	1	1	1	507.019	2024.05	4	2024.05	-0.0007	1	26.95	0.24	K	RPEKEPETILPYYHPR	A
3	2::tr|A0A151NFJ9|A0A151NFJ9_ALLMI	Uncharacterized protein OS=Alligator mississippiensis OX=8496 GN=Y1Q_0018187 PE=4 SV=1	2719	84511	168	168	45	45	69	754	MPPDMKISSEETVRKYFPETWIWDLIQMDSQGNAVLTLTIPDTITEWKASAFCTSEHSGFGLSPTVSLTAFQPFFLDLTLPYSVVRGEDFPLKATVFNYLAHCIRVSVSLSPCSDFSAAPVEKEEDAYCLCENERKTVSWTVTPKSLGEVEISVSAEALNGGLPCGDKVVEALSNWRKDTIIRKLLVEPEGIPRETTYNSLLCAAEKSAPSPVSLELPQNVVPDSARAYFSVLGDILGTAMHNLHQLLQMPFGCGEQNMVLFAPXXXILDYLNKTGQLKEETKSKAVGYLVSGYQRQLIYKHSDGSYSTFGPHSGQQGNTWLTAFVLKSFAQARRYMYIDSKHIQDAQLWLSSKQKENGCFRSSGMLLNNAIKGGVDDEVTLSAYITIALLEIPLPTTH…	5375	5114	1	1	1	507.019	2024.05	4	2024.05	-0.0006	1	58.2	0.00018	K	RPEKEPETILPYYHPR	A
3	2::tr|A0A151NFJ9|A0A151NFJ9_ALLMI	Uncharacterized protein OS=Alligator mississippiensis OX=8496 GN=Y1Q_0018187 PE=4 SV=1	2719	84511	168	168	45	45	69	754	MPPDMKISSEETVRKYFPETWIWDLIQMDSQGNAVLTLTIPDTITEWKASAFCTSEHSGFGLSPTVSLTAFQPFFLDLTLPYSVVRGEDFPLKATVFNYLAHCIRVSVSLSPCSDFSAAPVEKEEDAYCLCENERKTVSWTVTPKSLGEVEISVSAEALNGGLPCGDKVVEALSNWRKDTIIRKLLVEPEGIPRETTYNSLLCAAEKSAPSPVSLELPQNVVPDSARAYFSVLGDILGTAMHNLHQLLQMPFGCGEQNMVLFAPXXXILDYLNKTGQLKEETKSKAVGYLVSGYQRQLIYKHSDGSYSTFGPHSGQQGNTWLTAFVLKSFAQARRYMYIDSKHIQDAQLWLSSKQKENGCFRSSGMLLNNAIKGGVDDEVTLSAYITIALLEIPLPTTH…	5376	4988	1	1	1	507.019	2024.05	4	2024.05	-0.0001	1	61.94	7.5e-05	K	RPEKEPETILPYYHPR	A
3	2::tr|A0A151NFJ9|A0A151NFJ9_ALLMI	Uncharacterized protein OS=Alligator mississippiensis OX=8496 GN=Y1Q_0018187 PE=4 SV=1	2719	84511	168	168	45	45	69	754	MPPDMKISSEETVRKYFPETWIWDLIQMDSQGNAVLTLTIPDTITEWKASAFCTSEHSGFGLSPTVSLTAFQPFFLDLTLPYSVVRGEDFPLKATVFNYLAHCIRVSVSLSPCSDFSAAPVEKEEDAYCLCENERKTVSWTVTPKSLGEVEISVSAEALNGGLPCGDKVVEALSNWRKDTIIRKLLVEPEGIPRETTYNSLLCAAEKSAPSPVSLELPQNVVPDSARAYFSVLGDILGTAMHNLHQLLQMPFGCGEQNMVLFAPXXXILDYLNKTGQLKEETKSKAVGYLVSGYQRQLIYKHSDGSYSTFGPHSGQQGNTWLTAFVLKSFAQARRYMYIDSKHIQDAQLWLSSKQKENGCFRSSGMLLNNAIKGGVDDEVTLSAYITIALLEIPLPTTH…	5468	5823	1	1	1	688.363	2062.07	3	2062.07	-0.002	0	70.27	1.3e-05	K	SAPSPVSLELPQNVVPDSAR	A
3	2::tr|A0A151NFJ9|A0A151NFJ9_ALLMI	Uncharacterized protein OS=Alligator mississippiensis OX=8496 GN=Y1Q_0018187 PE=4 SV=1	2719	84511	168	168	45	45	69	754	MPPDMKISSEETVRKYFPETWIWDLIQMDSQGNAVLTLTIPDTITEWKASAFCTSEHSGFGLSPTVSLTAFQPFFLDLTLPYSVVRGEDFPLKATVFNYLAHCIRVSVSLSPCSDFSAAPVEKEEDAYCLCENERKTVSWTVTPKSLGEVEISVSAEALNGGLPCGDKVVEALSNWRKDTIIRKLLVEPEGIPRETTYNSLLCAAEKSAPSPVSLELPQNVVPDSARAYFSVLGDILGTAMHNLHQLLQMPFGCGEQNMVLFAPXXXILDYLNKTGQLKEETKSKAVGYLVSGYQRQLIYKHSDGSYSTFGPHSGQQGNTWLTAFVLKSFAQARRYMYIDSKHIQDAQLWLSSKQKENGCFRSSGMLLNNAIKGGVDDEVTLSAYITIALLEIPLPTTH…	5469	5952	1	1	1	1032.04	2062.07	2	2062.07	-0.002	0	37.43	0.025	K	SAPSPVSLELPQNVVPDSAR	A
3	2::tr|A0A151NFJ9|A0A151NFJ9_ALLMI	Uncharacterized protein OS=Alligator mississippiensis OX=8496 GN=Y1Q_0018187 PE=4 SV=1	2719	84511	168	168	45	45	69	754	MPPDMKISSEETVRKYFPETWIWDLIQMDSQGNAVLTLTIPDTITEWKASAFCTSEHSGFGLSPTVSLTAFQPFFLDLTLPYSVVRGEDFPLKATVFNYLAHCIRVSVSLSPCSDFSAAPVEKEEDAYCLCENERKTVSWTVTPKSLGEVEISVSAEALNGGLPCGDKVVEALSNWRKDTIIRKLLVEPEGIPRETTYNSLLCAAEKSAPSPVSLELPQNVVPDSARAYFSVLGDILGTAMHNLHQLLQMPFGCGEQNMVLFAPXXXILDYLNKTGQLKEETKSKAVGYLVSGYQRQLIYKHSDGSYSTFGPHSGQQGNTWLTAFVLKSFAQARRYMYIDSKHIQDAQLWLSSKQKENGCFRSSGMLLNNAIKGGVDDEVTLSAYITIALLEIPLPTTH…	5470	5818	1	1	1	1032.04	2062.07	2	2062.07	-0.001	0	104.23	5e-09	K	SAPSPVSLELPQNVVPDSAR	A
3	2::tr|A0A151NFJ9|A0A151NFJ9_ALLMI	Uncharacterized protein OS=Alligator mississippiensis OX=8496 GN=Y1Q_0018187 PE=4 SV=1	2719	84511	168	168	45	45	69	754	MPPDMKISSEETVRKYFPETWIWDLIQMDSQGNAVLTLTIPDTITEWKASAFCTSEHSGFGLSPTVSLTAFQPFFLDLTLPYSVVRGEDFPLKATVFNYLAHCIRVSVSLSPCSDFSAAPVEKEEDAYCLCENERKTVSWTVTPKSLGEVEISVSAEALNGGLPCGDKVVEALSNWRKDTIIRKLLVEPEGIPRETTYNSLLCAAEKSAPSPVSLELPQNVVPDSARAYFSVLGDILGTAMHNLHQLLQMPFGCGEQNMVLFAPXXXILDYLNKTGQLKEETKSKAVGYLVSGYQRQLIYKHSDGSYSTFGPHSGQQGNTWLTAFVLKSFAQARRYMYIDSKHIQDAQLWLSSKQKENGCFRSSGMLLNNAIKGGVDDEVTLSAYITIALLEIPLPTTH…	6091	5102	1	1	1	1147.54	2293.07	2	2293.08	-0.0066	0	71.48	1.1e-05	R	NALFCLETAAQQEGNHVYTK	A
3	2::tr|A0A151NFJ9|A0A151NFJ9_ALLMI	Uncharacterized protein OS=Alligator mississippiensis OX=8496 GN=Y1Q_0018187 PE=4 SV=1	2719	84511	168	168	45	45	69	754	MPPDMKISSEETVRKYFPETWIWDLIQMDSQGNAVLTLTIPDTITEWKASAFCTSEHSGFGLSPTVSLTAFQPFFLDLTLPYSVVRGEDFPLKATVFNYLAHCIRVSVSLSPCSDFSAAPVEKEEDAYCLCENERKTVSWTVTPKSLGEVEISVSAEALNGGLPCGDKVVEALSNWRKDTIIRKLLVEPEGIPRETTYNSLLCAAEKSAPSPVSLELPQNVVPDSARAYFSVLGDILGTAMHNLHQLLQMPFGCGEQNMVLFAPXXXILDYLNKTGQLKEETKSKAVGYLVSGYQRQLIYKHSDGSYSTFGPHSGQQGNTWLTAFVLKSFAQARRYMYIDSKHIQDAQLWLSSKQKENGCFRSSGMLLNNAIKGGVDDEVTLSAYITIALLEIPLPTTH…	6092	5061	1	1	1	765.366	2293.08	3	2293.08	-0.002	0	69.08	1.9e-05	R	NALFCLETAAQQEGNHVYTK	A
3	2::tr|A0A151NFJ9|A0A151NFJ9_ALLMI	Uncharacterized protein OS=Alligator mississippiensis OX=8496 GN=Y1Q_0018187 PE=4 SV=1	2719	84511	168	168	45	45	69	754	MPPDMKISSEETVRKYFPETWIWDLIQMDSQGNAVLTLTIPDTITEWKASAFCTSEHSGFGLSPTVSLTAFQPFFLDLTLPYSVVRGEDFPLKATVFNYLAHCIRVSVSLSPCSDFSAAPVEKEEDAYCLCENERKTVSWTVTPKSLGEVEISVSAEALNGGLPCGDKVVEALSNWRKDTIIRKLLVEPEGIPRETTYNSLLCAAEKSAPSPVSLELPQNVVPDSARAYFSVLGDILGTAMHNLHQLLQMPFGCGEQNMVLFAPXXXILDYLNKTGQLKEETKSKAVGYLVSGYQRQLIYKHSDGSYSTFGPHSGQQGNTWLTAFVLKSFAQARRYMYIDSKHIQDAQLWLSSKQKENGCFRSSGMLLNNAIKGGVDDEVTLSAYITIALLEIPLPTTH…	6094	5190	1	1	1	765.698	2294.07	3	2294.06	0.0099	0	62.79	7.7e-05	R	NALFCLETAAQQEGNHVYTK	A
3	2::tr|A0A151NFJ9|A0A151NFJ9_ALLMI	Uncharacterized protein OS=Alligator mississippiensis OX=8496 GN=Y1Q_0018187 PE=4 SV=1	2719	84511	168	168	45	45	69	754	MPPDMKISSEETVRKYFPETWIWDLIQMDSQGNAVLTLTIPDTITEWKASAFCTSEHSGFGLSPTVSLTAFQPFFLDLTLPYSVVRGEDFPLKATVFNYLAHCIRVSVSLSPCSDFSAAPVEKEEDAYCLCENERKTVSWTVTPKSLGEVEISVSAEALNGGLPCGDKVVEALSNWRKDTIIRKLLVEPEGIPRETTYNSLLCAAEKSAPSPVSLELPQNVVPDSARAYFSVLGDILGTAMHNLHQLLQMPFGCGEQNMVLFAPXXXILDYLNKTGQLKEETKSKAVGYLVSGYQRQLIYKHSDGSYSTFGPHSGQQGNTWLTAFVLKSFAQARRYMYIDSKHIQDAQLWLSSKQKENGCFRSSGMLLNNAIKGGVDDEVTLSAYITIALLEIPLPTTH…	6129	6633	1	1	1	1152.05	2302.09	2	2302.1	-0.0099	0	71.09	1.2e-05	K	SLGEVEISVSAEALNGGLPCGDK	V
3	2::tr|A0A151NFJ9|A0A151NFJ9_ALLMI	Uncharacterized protein OS=Alligator mississippiensis OX=8496 GN=Y1Q_0018187 PE=4 SV=1	2719	84511	168	168	45	45	69	754	MPPDMKISSEETVRKYFPETWIWDLIQMDSQGNAVLTLTIPDTITEWKASAFCTSEHSGFGLSPTVSLTAFQPFFLDLTLPYSVVRGEDFPLKATVFNYLAHCIRVSVSLSPCSDFSAAPVEKEEDAYCLCENERKTVSWTVTPKSLGEVEISVSAEALNGGLPCGDKVVEALSNWRKDTIIRKLLVEPEGIPRETTYNSLLCAAEKSAPSPVSLELPQNVVPDSARAYFSVLGDILGTAMHNLHQLLQMPFGCGEQNMVLFAPXXXILDYLNKTGQLKEETKSKAVGYLVSGYQRQLIYKHSDGSYSTFGPHSGQQGNTWLTAFVLKSFAQARRYMYIDSKHIQDAQLWLSSKQKENGCFRSSGMLLNNAIKGGVDDEVTLSAYITIALLEIPLPTTH…	6130	6616	1	1	1	768.372	2302.09	3	2302.1	-0.006	0	74.71	5.4e-06	K	SLGEVEISVSAEALNGGLPCGDK	V
3	2::tr|A0A151NFJ9|A0A151NFJ9_ALLMI	Uncharacterized protein OS=Alligator mississippiensis OX=8496 GN=Y1Q_0018187 PE=4 SV=1	2719	84511	168	168	45	45	69	754	MPPDMKISSEETVRKYFPETWIWDLIQMDSQGNAVLTLTIPDTITEWKASAFCTSEHSGFGLSPTVSLTAFQPFFLDLTLPYSVVRGEDFPLKATVFNYLAHCIRVSVSLSPCSDFSAAPVEKEEDAYCLCENERKTVSWTVTPKSLGEVEISVSAEALNGGLPCGDKVVEALSNWRKDTIIRKLLVEPEGIPRETTYNSLLCAAEKSAPSPVSLELPQNVVPDSARAYFSVLGDILGTAMHNLHQLLQMPFGCGEQNMVLFAPXXXILDYLNKTGQLKEETKSKAVGYLVSGYQRQLIYKHSDGSYSTFGPHSGQQGNTWLTAFVLKSFAQARRYMYIDSKHIQDAQLWLSSKQKENGCFRSSGMLLNNAIKGGVDDEVTLSAYITIALLEIPLPTTH…	6131	7164	1	1	1	768.372	2302.1	3	2302.1	-0.0042	0	58.73	0.00022	K	SLGEVEISVSAEALNGGLPCGDK	V
3	2::tr|A0A151NFJ9|A0A151NFJ9_ALLMI	Uncharacterized protein OS=Alligator mississippiensis OX=8496 GN=Y1Q_0018187 PE=4 SV=1	2719	84511	168	168	45	45	69	754	MPPDMKISSEETVRKYFPETWIWDLIQMDSQGNAVLTLTIPDTITEWKASAFCTSEHSGFGLSPTVSLTAFQPFFLDLTLPYSVVRGEDFPLKATVFNYLAHCIRVSVSLSPCSDFSAAPVEKEEDAYCLCENERKTVSWTVTPKSLGEVEISVSAEALNGGLPCGDKVVEALSNWRKDTIIRKLLVEPEGIPRETTYNSLLCAAEKSAPSPVSLELPQNVVPDSARAYFSVLGDILGTAMHNLHQLLQMPFGCGEQNMVLFAPXXXILDYLNKTGQLKEETKSKAVGYLVSGYQRQLIYKHSDGSYSTFGPHSGQQGNTWLTAFVLKSFAQARRYMYIDSKHIQDAQLWLSSKQKENGCFRSSGMLLNNAIKGGVDDEVTLSAYITIALLEIPLPTTH…	6132	6908	1	1	1	768.373	2302.1	3	2302.1	-0.0038	0	88.12	2.5e-07	K	SLGEVEISVSAEALNGGLPCGDK	V
3	2::tr|A0A151NFJ9|A0A151NFJ9_ALLMI	Uncharacterized protein OS=Alligator mississippiensis OX=8496 GN=Y1Q_0018187 PE=4 SV=1	2719	84511	168	168	45	45	69	754	MPPDMKISSEETVRKYFPETWIWDLIQMDSQGNAVLTLTIPDTITEWKASAFCTSEHSGFGLSPTVSLTAFQPFFLDLTLPYSVVRGEDFPLKATVFNYLAHCIRVSVSLSPCSDFSAAPVEKEEDAYCLCENERKTVSWTVTPKSLGEVEISVSAEALNGGLPCGDKVVEALSNWRKDTIIRKLLVEPEGIPRETTYNSLLCAAEKSAPSPVSLELPQNVVPDSARAYFSVLGDILGTAMHNLHQLLQMPFGCGEQNMVLFAPXXXILDYLNKTGQLKEETKSKAVGYLVSGYQRQLIYKHSDGSYSTFGPHSGQQGNTWLTAFVLKSFAQARRYMYIDSKHIQDAQLWLSSKQKENGCFRSSGMLLNNAIKGGVDDEVTLSAYITIALLEIPLPTTH…	6133	7526	1	1	1	1152.06	2302.1	2	2302.1	-0.0038	0	32.49	0.093	K	SLGEVEISVSAEALNGGLPCGDK	V
3	2::tr|A0A151NFJ9|A0A151NFJ9_ALLMI	Uncharacterized protein OS=Alligator mississippiensis OX=8496 GN=Y1Q_0018187 PE=4 SV=1	2719	84511	168	168	45	45	69	754	MPPDMKISSEETVRKYFPETWIWDLIQMDSQGNAVLTLTIPDTITEWKASAFCTSEHSGFGLSPTVSLTAFQPFFLDLTLPYSVVRGEDFPLKATVFNYLAHCIRVSVSLSPCSDFSAAPVEKEEDAYCLCENERKTVSWTVTPKSLGEVEISVSAEALNGGLPCGDKVVEALSNWRKDTIIRKLLVEPEGIPRETTYNSLLCAAEKSAPSPVSLELPQNVVPDSARAYFSVLGDILGTAMHNLHQLLQMPFGCGEQNMVLFAPXXXILDYLNKTGQLKEETKSKAVGYLVSGYQRQLIYKHSDGSYSTFGPHSGQQGNTWLTAFVLKSFAQARRYMYIDSKHIQDAQLWLSSKQKENGCFRSSGMLLNNAIKGGVDDEVTLSAYITIALLEIPLPTTH…	6134	6232	1	1	1	1152.06	2302.1	2	2302.1	-0.0033	0	104.08	6.4e-09	K	SLGEVEISVSAEALNGGLPCGDK	V
3	2::tr|A0A151NFJ9|A0A151NFJ9_ALLMI	Uncharacterized protein OS=Alligator mississippiensis OX=8496 GN=Y1Q_0018187 PE=4 SV=1	2719	84511	168	168	45	45	69	754	MPPDMKISSEETVRKYFPETWIWDLIQMDSQGNAVLTLTIPDTITEWKASAFCTSEHSGFGLSPTVSLTAFQPFFLDLTLPYSVVRGEDFPLKATVFNYLAHCIRVSVSLSPCSDFSAAPVEKEEDAYCLCENERKTVSWTVTPKSLGEVEISVSAEALNGGLPCGDKVVEALSNWRKDTIIRKLLVEPEGIPRETTYNSLLCAAEKSAPSPVSLELPQNVVPDSARAYFSVLGDILGTAMHNLHQLLQMPFGCGEQNMVLFAPXXXILDYLNKTGQLKEETKSKAVGYLVSGYQRQLIYKHSDGSYSTFGPHSGQQGNTWLTAFVLKSFAQARRYMYIDSKHIQDAQLWLSSKQKENGCFRSSGMLLNNAIKGGVDDEVTLSAYITIALLEIPLPTTH…	6135	6492	1	1	1	1152.06	2302.1	2	2302.1	-0.0033	0	102.76	8.7e-09	K	SLGEVEISVSAEALNGGLPCGDK	V
3	2::tr|A0A151NFJ9|A0A151NFJ9_ALLMI	Uncharacterized protein OS=Alligator mississippiensis OX=8496 GN=Y1Q_0018187 PE=4 SV=1	2719	84511	168	168	45	45	69	754	MPPDMKISSEETVRKYFPETWIWDLIQMDSQGNAVLTLTIPDTITEWKASAFCTSEHSGFGLSPTVSLTAFQPFFLDLTLPYSVVRGEDFPLKATVFNYLAHCIRVSVSLSPCSDFSAAPVEKEEDAYCLCENERKTVSWTVTPKSLGEVEISVSAEALNGGLPCGDKVVEALSNWRKDTIIRKLLVEPEGIPRETTYNSLLCAAEKSAPSPVSLELPQNVVPDSARAYFSVLGDILGTAMHNLHQLLQMPFGCGEQNMVLFAPXXXILDYLNKTGQLKEETKSKAVGYLVSGYQRQLIYKHSDGSYSTFGPHSGQQGNTWLTAFVLKSFAQARRYMYIDSKHIQDAQLWLSSKQKENGCFRSSGMLLNNAIKGGVDDEVTLSAYITIALLEIPLPTTH…	6136	6114	1	1	1	1152.06	2302.1	2	2302.1	-0.0014	0	85.66	4.5e-07	K	SLGEVEISVSAEALNGGLPCGDK	V
3	2::tr|A0A151NFJ9|A0A151NFJ9_ALLMI	Uncharacterized protein OS=Alligator mississippiensis OX=8496 GN=Y1Q_0018187 PE=4 SV=1	2719	84511	168	168	45	45	69	754	MPPDMKISSEETVRKYFPETWIWDLIQMDSQGNAVLTLTIPDTITEWKASAFCTSEHSGFGLSPTVSLTAFQPFFLDLTLPYSVVRGEDFPLKATVFNYLAHCIRVSVSLSPCSDFSAAPVEKEEDAYCLCENERKTVSWTVTPKSLGEVEISVSAEALNGGLPCGDKVVEALSNWRKDTIIRKLLVEPEGIPRETTYNSLLCAAEKSAPSPVSLELPQNVVPDSARAYFSVLGDILGTAMHNLHQLLQMPFGCGEQNMVLFAPXXXILDYLNKTGQLKEETKSKAVGYLVSGYQRQLIYKHSDGSYSTFGPHSGQQGNTWLTAFVLKSFAQARRYMYIDSKHIQDAQLWLSSKQKENGCFRSSGMLLNNAIKGGVDDEVTLSAYITIALLEIPLPTTH…	6138	6894	1	1	1	1152.06	2302.1	2	2302.1	-0.0001	0	97.64	2.9e-08	K	SLGEVEISVSAEALNGGLPCGDK	V
3	2::tr|A0A151NFJ9|A0A151NFJ9_ALLMI	Uncharacterized protein OS=Alligator mississippiensis OX=8496 GN=Y1Q_0018187 PE=4 SV=1	2719	84511	168	168	45	45	69	754	MPPDMKISSEETVRKYFPETWIWDLIQMDSQGNAVLTLTIPDTITEWKASAFCTSEHSGFGLSPTVSLTAFQPFFLDLTLPYSVVRGEDFPLKATVFNYLAHCIRVSVSLSPCSDFSAAPVEKEEDAYCLCENERKTVSWTVTPKSLGEVEISVSAEALNGGLPCGDKVVEALSNWRKDTIIRKLLVEPEGIPRETTYNSLLCAAEKSAPSPVSLELPQNVVPDSARAYFSVLGDILGTAMHNLHQLLQMPFGCGEQNMVLFAPXXXILDYLNKTGQLKEETKSKAVGYLVSGYQRQLIYKHSDGSYSTFGPHSGQQGNTWLTAFVLKSFAQARRYMYIDSKHIQDAQLWLSSKQKENGCFRSSGMLLNNAIKGGVDDEVTLSAYITIALLEIPLPTTH…	6139	7379	1	1	1	1152.06	2302.1	2	2302.1	0.0001	0	27.35	0.31	K	SLGEVEISVSAEALNGGLPCGDK	V
3	2::tr|A0A151NFJ9|A0A151NFJ9_ALLMI	Uncharacterized protein OS=Alligator mississippiensis OX=8496 GN=Y1Q_0018187 PE=4 SV=1	2719	84511	168	168	45	45	69	754	MPPDMKISSEETVRKYFPETWIWDLIQMDSQGNAVLTLTIPDTITEWKASAFCTSEHSGFGLSPTVSLTAFQPFFLDLTLPYSVVRGEDFPLKATVFNYLAHCIRVSVSLSPCSDFSAAPVEKEEDAYCLCENERKTVSWTVTPKSLGEVEISVSAEALNGGLPCGDKVVEALSNWRKDTIIRKLLVEPEGIPRETTYNSLLCAAEKSAPSPVSLELPQNVVPDSARAYFSVLGDILGTAMHNLHQLLQMPFGCGEQNMVLFAPXXXILDYLNKTGQLKEETKSKAVGYLVSGYQRQLIYKHSDGSYSTFGPHSGQQGNTWLTAFVLKSFAQARRYMYIDSKHIQDAQLWLSSKQKENGCFRSSGMLLNNAIKGGVDDEVTLSAYITIALLEIPLPTTH…	6140	6766	1	1	1	1152.06	2302.1	2	2302.1	0.0001	0	102.13	1e-08	K	SLGEVEISVSAEALNGGLPCGDK	V
3	2::tr|A0A151NFJ9|A0A151NFJ9_ALLMI	Uncharacterized protein OS=Alligator mississippiensis OX=8496 GN=Y1Q_0018187 PE=4 SV=1	2719	84511	168	168	45	45	69	754	MPPDMKISSEETVRKYFPETWIWDLIQMDSQGNAVLTLTIPDTITEWKASAFCTSEHSGFGLSPTVSLTAFQPFFLDLTLPYSVVRGEDFPLKATVFNYLAHCIRVSVSLSPCSDFSAAPVEKEEDAYCLCENERKTVSWTVTPKSLGEVEISVSAEALNGGLPCGDKVVEALSNWRKDTIIRKLLVEPEGIPRETTYNSLLCAAEKSAPSPVSLELPQNVVPDSARAYFSVLGDILGTAMHNLHQLLQMPFGCGEQNMVLFAPXXXILDYLNKTGQLKEETKSKAVGYLVSGYQRQLIYKHSDGSYSTFGPHSGQQGNTWLTAFVLKSFAQARRYMYIDSKHIQDAQLWLSSKQKENGCFRSSGMLLNNAIKGGVDDEVTLSAYITIALLEIPLPTTH…	6141	6787	1	1	1	768.374	2302.1	3	2302.1	0.001	0	68.68	2.2e-05	K	SLGEVEISVSAEALNGGLPCGDK	V
3	2::tr|A0A151NFJ9|A0A151NFJ9_ALLMI	Uncharacterized protein OS=Alligator mississippiensis OX=8496 GN=Y1Q_0018187 PE=4 SV=1	2719	84511	168	168	45	45	69	754	MPPDMKISSEETVRKYFPETWIWDLIQMDSQGNAVLTLTIPDTITEWKASAFCTSEHSGFGLSPTVSLTAFQPFFLDLTLPYSVVRGEDFPLKATVFNYLAHCIRVSVSLSPCSDFSAAPVEKEEDAYCLCENERKTVSWTVTPKSLGEVEISVSAEALNGGLPCGDKVVEALSNWRKDTIIRKLLVEPEGIPRETTYNSLLCAAEKSAPSPVSLELPQNVVPDSARAYFSVLGDILGTAMHNLHQLLQMPFGCGEQNMVLFAPXXXILDYLNKTGQLKEETKSKAVGYLVSGYQRQLIYKHSDGSYSTFGPHSGQQGNTWLTAFVLKSFAQARRYMYIDSKHIQDAQLWLSSKQKENGCFRSSGMLLNNAIKGGVDDEVTLSAYITIALLEIPLPTTH…	6142	7023	1	1	1	1152.06	2302.1	2	2302.1	0.0011	0	104.09	6.4e-09	K	SLGEVEISVSAEALNGGLPCGDK	V
3	2::tr|A0A151NFJ9|A0A151NFJ9_ALLMI	Uncharacterized protein OS=Alligator mississippiensis OX=8496 GN=Y1Q_0018187 PE=4 SV=1	2719	84511	168	168	45	45	69	754	MPPDMKISSEETVRKYFPETWIWDLIQMDSQGNAVLTLTIPDTITEWKASAFCTSEHSGFGLSPTVSLTAFQPFFLDLTLPYSVVRGEDFPLKATVFNYLAHCIRVSVSLSPCSDFSAAPVEKEEDAYCLCENERKTVSWTVTPKSLGEVEISVSAEALNGGLPCGDKVVEALSNWRKDTIIRKLLVEPEGIPRETTYNSLLCAAEKSAPSPVSLELPQNVVPDSARAYFSVLGDILGTAMHNLHQLLQMPFGCGEQNMVLFAPXXXILDYLNKTGQLKEETKSKAVGYLVSGYQRQLIYKHSDGSYSTFGPHSGQQGNTWLTAFVLKSFAQARRYMYIDSKHIQDAQLWLSSKQKENGCFRSSGMLLNNAIKGGVDDEVTLSAYITIALLEIPLPTTH…	6143	6358	1	1	1	1152.06	2302.1	2	2302.1	0.0013	0	104.59	5.7e-09	K	SLGEVEISVSAEALNGGLPCGDK	V
3	2::tr|A0A151NFJ9|A0A151NFJ9_ALLMI	Uncharacterized protein OS=Alligator mississippiensis OX=8496 GN=Y1Q_0018187 PE=4 SV=1	2719	84511	168	168	45	45	69	754	MPPDMKISSEETVRKYFPETWIWDLIQMDSQGNAVLTLTIPDTITEWKASAFCTSEHSGFGLSPTVSLTAFQPFFLDLTLPYSVVRGEDFPLKATVFNYLAHCIRVSVSLSPCSDFSAAPVEKEEDAYCLCENERKTVSWTVTPKSLGEVEISVSAEALNGGLPCGDKVVEALSNWRKDTIIRKLLVEPEGIPRETTYNSLLCAAEKSAPSPVSLELPQNVVPDSARAYFSVLGDILGTAMHNLHQLLQMPFGCGEQNMVLFAPXXXILDYLNKTGQLKEETKSKAVGYLVSGYQRQLIYKHSDGSYSTFGPHSGQQGNTWLTAFVLKSFAQARRYMYIDSKHIQDAQLWLSSKQKENGCFRSSGMLLNNAIKGGVDDEVTLSAYITIALLEIPLPTTH…	6144	7146	1	1	1	1152.06	2302.1	2	2302.1	0.0026	0	91.04	1.3e-07	K	SLGEVEISVSAEALNGGLPCGDK	V
3	2::tr|A0A151NFJ9|A0A151NFJ9_ALLMI	Uncharacterized protein OS=Alligator mississippiensis OX=8496 GN=Y1Q_0018187 PE=4 SV=1	2719	84511	168	168	45	45	69	754	MPPDMKISSEETVRKYFPETWIWDLIQMDSQGNAVLTLTIPDTITEWKASAFCTSEHSGFGLSPTVSLTAFQPFFLDLTLPYSVVRGEDFPLKATVFNYLAHCIRVSVSLSPCSDFSAAPVEKEEDAYCLCENERKTVSWTVTPKSLGEVEISVSAEALNGGLPCGDKVVEALSNWRKDTIIRKLLVEPEGIPRETTYNSLLCAAEKSAPSPVSLELPQNVVPDSARAYFSVLGDILGTAMHNLHQLLQMPFGCGEQNMVLFAPXXXILDYLNKTGQLKEETKSKAVGYLVSGYQRQLIYKHSDGSYSTFGPHSGQQGNTWLTAFVLKSFAQARRYMYIDSKHIQDAQLWLSSKQKENGCFRSSGMLLNNAIKGGVDDEVTLSAYITIALLEIPLPTTH…	7475	7242	1	1	1	974.798	2921.37	3	2921.37	-0.0007	0	27.79	0.29	K	HSDGSYSTFGPHSGQQGNTWLTAFVLK	S
3	2::tr|A0A151NFJ9|A0A151NFJ9_ALLMI	Uncharacterized protein OS=Alligator mississippiensis OX=8496 GN=Y1Q_0018187 PE=4 SV=1	2719	84511	168	168	45	45	69	754	MPPDMKISSEETVRKYFPETWIWDLIQMDSQGNAVLTLTIPDTITEWKASAFCTSEHSGFGLSPTVSLTAFQPFFLDLTLPYSVVRGEDFPLKATVFNYLAHCIRVSVSLSPCSDFSAAPVEKEEDAYCLCENERKTVSWTVTPKSLGEVEISVSAEALNGGLPCGDKVVEALSNWRKDTIIRKLLVEPEGIPRETTYNSLLCAAEKSAPSPVSLELPQNVVPDSARAYFSVLGDILGTAMHNLHQLLQMPFGCGEQNMVLFAPXXXILDYLNKTGQLKEETKSKAVGYLVSGYQRQLIYKHSDGSYSTFGPHSGQQGNTWLTAFVLKSFAQARRYMYIDSKHIQDAQLWLSSKQKENGCFRSSGMLLNNAIKGGVDDEVTLSAYITIALLEIPLPTTH…	7476	7235	1	1	1	731.847	2923.36	4	2923.34	0.017	0	67.14	3e-05	K	HSDGSYSTFGPHSGQQGNTWLTAFVLK	S
3	2::tr|A0A151NFJ9|A0A151NFJ9_ALLMI	Uncharacterized protein OS=Alligator mississippiensis OX=8496 GN=Y1Q_0018187 PE=4 SV=1	2719	84511	168	168	45	45	69	754	MPPDMKISSEETVRKYFPETWIWDLIQMDSQGNAVLTLTIPDTITEWKASAFCTSEHSGFGLSPTVSLTAFQPFFLDLTLPYSVVRGEDFPLKATVFNYLAHCIRVSVSLSPCSDFSAAPVEKEEDAYCLCENERKTVSWTVTPKSLGEVEISVSAEALNGGLPCGDKVVEALSNWRKDTIIRKLLVEPEGIPRETTYNSLLCAAEKSAPSPVSLELPQNVVPDSARAYFSVLGDILGTAMHNLHQLLQMPFGCGEQNMVLFAPXXXILDYLNKTGQLKEETKSKAVGYLVSGYQRQLIYKHSDGSYSTFGPHSGQQGNTWLTAFVLKSFAQARRYMYIDSKHIQDAQLWLSSKQKENGCFRSSGMLLNNAIKGGVDDEVTLSAYITIALLEIPLPTTH…	7913	5800	1	1	1	799.887	3195.52	4	3195.53	-0.0145	0	40.9	0.015	R	YNVYPKPEEAPFQLHVHTIPETCDSPK	A
3	2::tr|A0A151NFJ9|A0A151NFJ9_ALLMI	Uncharacterized protein OS=Alligator mississippiensis OX=8496 GN=Y1Q_0018187 PE=4 SV=1	2719	84511	168	168	45	45	69	754	MPPDMKISSEETVRKYFPETWIWDLIQMDSQGNAVLTLTIPDTITEWKASAFCTSEHSGFGLSPTVSLTAFQPFFLDLTLPYSVVRGEDFPLKATVFNYLAHCIRVSVSLSPCSDFSAAPVEKEEDAYCLCENERKTVSWTVTPKSLGEVEISVSAEALNGGLPCGDKVVEALSNWRKDTIIRKLLVEPEGIPRETTYNSLLCAAEKSAPSPVSLELPQNVVPDSARAYFSVLGDILGTAMHNLHQLLQMPFGCGEQNMVLFAPXXXILDYLNKTGQLKEETKSKAVGYLVSGYQRQLIYKHSDGSYSTFGPHSGQQGNTWLTAFVLKSFAQARRYMYIDSKHIQDAQLWLSSKQKENGCFRSSGMLLNNAIKGGVDDEVTLSAYITIALLEIPLPTTH…	7943	7402	1	1	1	1073.93	3218.77	3	3218.78	-0.0133	0	32.12	0.016	K	GGVDDEVTLSAYITIALLEIPLPTTHIIVR	N
3	2::tr|A0A151NFJ9|A0A151NFJ9_ALLMI	Uncharacterized protein OS=Alligator mississippiensis OX=8496 GN=Y1Q_0018187 PE=4 SV=1	2719	84511	168	168	45	45	69	754	MPPDMKISSEETVRKYFPETWIWDLIQMDSQGNAVLTLTIPDTITEWKASAFCTSEHSGFGLSPTVSLTAFQPFFLDLTLPYSVVRGEDFPLKATVFNYLAHCIRVSVSLSPCSDFSAAPVEKEEDAYCLCENERKTVSWTVTPKSLGEVEISVSAEALNGGLPCGDKVVEALSNWRKDTIIRKLLVEPEGIPRETTYNSLLCAAEKSAPSPVSLELPQNVVPDSARAYFSVLGDILGTAMHNLHQLLQMPFGCGEQNMVLFAPXXXILDYLNKTGQLKEETKSKAVGYLVSGYQRQLIYKHSDGSYSTFGPHSGQQGNTWLTAFVLKSFAQARRYMYIDSKHIQDAQLWLSSKQKENGCFRSSGMLLNNAIKGGVDDEVTLSAYITIALLEIPLPTTH…	7945	7339	1	1	1	1073.93	3218.78	3	3218.78	-0.0009	0	28.92	0.028	K	GGVDDEVTLSAYITIALLEIPLPTTHIIVR	N
3	2::tr|A0A151NFJ9|A0A151NFJ9_ALLMI	Uncharacterized protein OS=Alligator mississippiensis OX=8496 GN=Y1Q_0018187 PE=4 SV=1	2719	84511	168	168	45	45	69	754	MPPDMKISSEETVRKYFPETWIWDLIQMDSQGNAVLTLTIPDTITEWKASAFCTSEHSGFGLSPTVSLTAFQPFFLDLTLPYSVVRGEDFPLKATVFNYLAHCIRVSVSLSPCSDFSAAPVEKEEDAYCLCENERKTVSWTVTPKSLGEVEISVSAEALNGGLPCGDKVVEALSNWRKDTIIRKLLVEPEGIPRETTYNSLLCAAEKSAPSPVSLELPQNVVPDSARAYFSVLGDILGTAMHNLHQLLQMPFGCGEQNMVLFAPXXXILDYLNKTGQLKEETKSKAVGYLVSGYQRQLIYKHSDGSYSTFGPHSGQQGNTWLTAFVLKSFAQARRYMYIDSKHIQDAQLWLSSKQKENGCFRSSGMLLNNAIKGGVDDEVTLSAYITIALLEIPLPTTH…	7946	7268	1	1	1	1073.94	3218.78	3	3218.78	0.0031	0	51.14	0.00016	K	GGVDDEVTLSAYITIALLEIPLPTTHIIVR	N
3	2::tr|A0A151NFJ9|A0A151NFJ9_ALLMI	Uncharacterized protein OS=Alligator mississippiensis OX=8496 GN=Y1Q_0018187 PE=4 SV=1	2719	84511	168	168	45	45	69	754	MPPDMKISSEETVRKYFPETWIWDLIQMDSQGNAVLTLTIPDTITEWKASAFCTSEHSGFGLSPTVSLTAFQPFFLDLTLPYSVVRGEDFPLKATVFNYLAHCIRVSVSLSPCSDFSAAPVEKEEDAYCLCENERKTVSWTVTPKSLGEVEISVSAEALNGGLPCGDKVVEALSNWRKDTIIRKLLVEPEGIPRETTYNSLLCAAEKSAPSPVSLELPQNVVPDSARAYFSVLGDILGTAMHNLHQLLQMPFGCGEQNMVLFAPXXXILDYLNKTGQLKEETKSKAVGYLVSGYQRQLIYKHSDGSYSTFGPHSGQQGNTWLTAFVLKSFAQARRYMYIDSKHIQDAQLWLSSKQKENGCFRSSGMLLNNAIKGGVDDEVTLSAYITIALLEIPLPTTH…	7947	7557	1	1	1	1073.94	3218.79	3	3218.78	0.009	0	29.46	0.02	K	GGVDDEVTLSAYITIALLEIPLPTTHIIVR	N
3	2::tr|A0A151NFJ9|A0A151NFJ9_ALLMI	Uncharacterized protein OS=Alligator mississippiensis OX=8496 GN=Y1Q_0018187 PE=4 SV=1	2719	84511	168	168	45	45	69	754	MPPDMKISSEETVRKYFPETWIWDLIQMDSQGNAVLTLTIPDTITEWKASAFCTSEHSGFGLSPTVSLTAFQPFFLDLTLPYSVVRGEDFPLKATVFNYLAHCIRVSVSLSPCSDFSAAPVEKEEDAYCLCENERKTVSWTVTPKSLGEVEISVSAEALNGGLPCGDKVVEALSNWRKDTIIRKLLVEPEGIPRETTYNSLLCAAEKSAPSPVSLELPQNVVPDSARAYFSVLGDILGTAMHNLHQLLQMPFGCGEQNMVLFAPXXXILDYLNKTGQLKEETKSKAVGYLVSGYQRQLIYKHSDGSYSTFGPHSGQQGNTWLTAFVLKSFAQARRYMYIDSKHIQDAQLWLSSKQKENGCFRSSGMLLNNAIKGGVDDEVTLSAYITIALLEIPLPTTH…	7950	7460	1	1	1	1074.27	3219.78	3	3219.76	0.0174	0	27.26	0.037	K	GGVDDEVTLSAYITIALLEIPLPTTHIIVR	N
3	2::tr|A0A151NFJ9|A0A151NFJ9_ALLMI	Uncharacterized protein OS=Alligator mississippiensis OX=8496 GN=Y1Q_0018187 PE=4 SV=1	2719	84511	168	168	45	45	69	754	MPPDMKISSEETVRKYFPETWIWDLIQMDSQGNAVLTLTIPDTITEWKASAFCTSEHSGFGLSPTVSLTAFQPFFLDLTLPYSVVRGEDFPLKATVFNYLAHCIRVSVSLSPCSDFSAAPVEKEEDAYCLCENERKTVSWTVTPKSLGEVEISVSAEALNGGLPCGDKVVEALSNWRKDTIIRKLLVEPEGIPRETTYNSLLCAAEKSAPSPVSLELPQNVVPDSARAYFSVLGDILGTAMHNLHQLLQMPFGCGEQNMVLFAPXXXILDYLNKTGQLKEETKSKAVGYLVSGYQRQLIYKHSDGSYSTFGPHSGQQGNTWLTAFVLKSFAQARRYMYIDSKHIQDAQLWLSSKQKENGCFRSSGMLLNNAIKGGVDDEVTLSAYITIALLEIPLPTTH…	7951	7507	1	1	1	1074.27	3219.78	3	3219.76	0.0174	0	37.89	0.0032	K	GGVDDEVTLSAYITIALLEIPLPTTHIIVR	N
3	2::tr|A0A151NFJ9|A0A151NFJ9_ALLMI	Uncharacterized protein OS=Alligator mississippiensis OX=8496 GN=Y1Q_0018187 PE=4 SV=1	2719	84511	168	168	45	45	69	754	MPPDMKISSEETVRKYFPETWIWDLIQMDSQGNAVLTLTIPDTITEWKASAFCTSEHSGFGLSPTVSLTAFQPFFLDLTLPYSVVRGEDFPLKATVFNYLAHCIRVSVSLSPCSDFSAAPVEKEEDAYCLCENERKTVSWTVTPKSLGEVEISVSAEALNGGLPCGDKVVEALSNWRKDTIIRKLLVEPEGIPRETTYNSLLCAAEKSAPSPVSLELPQNVVPDSARAYFSVLGDILGTAMHNLHQLLQMPFGCGEQNMVLFAPXXXILDYLNKTGQLKEETKSKAVGYLVSGYQRQLIYKHSDGSYSTFGPHSGQQGNTWLTAFVLKSFAQARRYMYIDSKHIQDAQLWLSSKQKENGCFRSSGMLLNNAIKGGVDDEVTLSAYITIALLEIPLPTTH…	8096	7285	1	1	1	1119.89	3356.64	3	3356.66	-0.0186	1	74.85	6.2e-06	K	SLGEVEISVSAEALNGGLPCGDKVVEALSNWR	K
3	2::tr|A0A151NFJ9|A0A151NFJ9_ALLMI	Uncharacterized protein OS=Alligator mississippiensis OX=8496 GN=Y1Q_0018187 PE=4 SV=1	2719	84511	168	168	45	45	69	754	MPPDMKISSEETVRKYFPETWIWDLIQMDSQGNAVLTLTIPDTITEWKASAFCTSEHSGFGLSPTVSLTAFQPFFLDLTLPYSVVRGEDFPLKATVFNYLAHCIRVSVSLSPCSDFSAAPVEKEEDAYCLCENERKTVSWTVTPKSLGEVEISVSAEALNGGLPCGDKVVEALSNWRKDTIIRKLLVEPEGIPRETTYNSLLCAAEKSAPSPVSLELPQNVVPDSARAYFSVLGDILGTAMHNLHQLLQMPFGCGEQNMVLFAPXXXILDYLNKTGQLKEETKSKAVGYLVSGYQRQLIYKHSDGSYSTFGPHSGQQGNTWLTAFVLKSFAQARRYMYIDSKHIQDAQLWLSSKQKENGCFRSSGMLLNNAIKGGVDDEVTLSAYITIALLEIPLPTTH…	8097	7473	1	1	1	1119.89	3356.64	3	3356.66	-0.0164	1	32.03	0.12	K	SLGEVEISVSAEALNGGLPCGDKVVEALSNWR	K
3	2::tr|A0A151NFJ9|A0A151NFJ9_ALLMI	Uncharacterized protein OS=Alligator mississippiensis OX=8496 GN=Y1Q_0018187 PE=4 SV=1	2719	84511	168	168	45	45	69	754	MPPDMKISSEETVRKYFPETWIWDLIQMDSQGNAVLTLTIPDTITEWKASAFCTSEHSGFGLSPTVSLTAFQPFFLDLTLPYSVVRGEDFPLKATVFNYLAHCIRVSVSLSPCSDFSAAPVEKEEDAYCLCENERKTVSWTVTPKSLGEVEISVSAEALNGGLPCGDKVVEALSNWRKDTIIRKLLVEPEGIPRETTYNSLLCAAEKSAPSPVSLELPQNVVPDSARAYFSVLGDILGTAMHNLHQLLQMPFGCGEQNMVLFAPXXXILDYLNKTGQLKEETKSKAVGYLVSGYQRQLIYKHSDGSYSTFGPHSGQQGNTWLTAFVLKSFAQARRYMYIDSKHIQDAQLWLSSKQKENGCFRSSGMLLNNAIKGGVDDEVTLSAYITIALLEIPLPTTH…	8102	7414	1	1	1	1120.22	3357.65	3	3357.64	0.0125	1	34.66	0.062	K	SLGEVEISVSAEALNGGLPCGDKVVEALSNWR	K
3	2::tr|A0A151NFJ9|A0A151NFJ9_ALLMI	Uncharacterized protein OS=Alligator mississippiensis OX=8496 GN=Y1Q_0018187 PE=4 SV=1	2719	84511	168	168	45	45	69	754	MPPDMKISSEETVRKYFPETWIWDLIQMDSQGNAVLTLTIPDTITEWKASAFCTSEHSGFGLSPTVSLTAFQPFFLDLTLPYSVVRGEDFPLKATVFNYLAHCIRVSVSLSPCSDFSAAPVEKEEDAYCLCENERKTVSWTVTPKSLGEVEISVSAEALNGGLPCGDKVVEALSNWRKDTIIRKLLVEPEGIPRETTYNSLLCAAEKSAPSPVSLELPQNVVPDSARAYFSVLGDILGTAMHNLHQLLQMPFGCGEQNMVLFAPXXXILDYLNKTGQLKEETKSKAVGYLVSGYQRQLIYKHSDGSYSTFGPHSGQQGNTWLTAFVLKSFAQARRYMYIDSKHIQDAQLWLSSKQKENGCFRSSGMLLNNAIKGGVDDEVTLSAYITIALLEIPLPTTH…	8187	6285	1	1	1	1140.86	3419.54	3	3419.55	-0.0105	1	43.9	0.005	K	QAQVEVYDYYEKDEFAIAEYQAPCYTVK	A
3	2::tr|A0A151NFJ9|A0A151NFJ9_ALLMI	Uncharacterized protein OS=Alligator mississippiensis OX=8496 GN=Y1Q_0018187 PE=4 SV=1	2719	84511	168	168	45	45	69	754	MPPDMKISSEETVRKYFPETWIWDLIQMDSQGNAVLTLTIPDTITEWKASAFCTSEHSGFGLSPTVSLTAFQPFFLDLTLPYSVVRGEDFPLKATVFNYLAHCIRVSVSLSPCSDFSAAPVEKEEDAYCLCENERKTVSWTVTPKSLGEVEISVSAEALNGGLPCGDKVVEALSNWRKDTIIRKLLVEPEGIPRETTYNSLLCAAEKSAPSPVSLELPQNVVPDSARAYFSVLGDILGTAMHNLHQLLQMPFGCGEQNMVLFAPXXXILDYLNKTGQLKEETKSKAVGYLVSGYQRQLIYKHSDGSYSTFGPHSGQQGNTWLTAFVLKSFAQARRYMYIDSKHIQDAQLWLSSKQKENGCFRSSGMLLNNAIKGGVDDEVTLSAYITIALLEIPLPTTH…	8188	6417	1	1	1	1140.86	3419.55	3	3419.55	-0.0058	1	37.64	0.022	K	QAQVEVYDYYEKDEFAIAEYQAPCYTVK	A
3	2::tr|A0A151NFJ9|A0A151NFJ9_ALLMI	Uncharacterized protein OS=Alligator mississippiensis OX=8496 GN=Y1Q_0018187 PE=4 SV=1	2719	84511	168	168	45	45	69	754	MPPDMKISSEETVRKYFPETWIWDLIQMDSQGNAVLTLTIPDTITEWKASAFCTSEHSGFGLSPTVSLTAFQPFFLDLTLPYSVVRGEDFPLKATVFNYLAHCIRVSVSLSPCSDFSAAPVEKEEDAYCLCENERKTVSWTVTPKSLGEVEISVSAEALNGGLPCGDKVVEALSNWRKDTIIRKLLVEPEGIPRETTYNSLLCAAEKSAPSPVSLELPQNVVPDSARAYFSVLGDILGTAMHNLHQLLQMPFGCGEQNMVLFAPXXXILDYLNKTGQLKEETKSKAVGYLVSGYQRQLIYKHSDGSYSTFGPHSGQQGNTWLTAFVLKSFAQARRYMYIDSKHIQDAQLWLSSKQKENGCFRSSGMLLNNAIKGGVDDEVTLSAYITIALLEIPLPTTH…	8189	6689	1	1	1	1140.86	3419.55	3	3419.55	-0.0054	1	71.36	9.4e-06	K	QAQVEVYDYYEKDEFAIAEYQAPCYTVK	A
3	2::tr|A0A151NFJ9|A0A151NFJ9_ALLMI	Uncharacterized protein OS=Alligator mississippiensis OX=8496 GN=Y1Q_0018187 PE=4 SV=1	2719	84511	168	168	45	45	69	754	MPPDMKISSEETVRKYFPETWIWDLIQMDSQGNAVLTLTIPDTITEWKASAFCTSEHSGFGLSPTVSLTAFQPFFLDLTLPYSVVRGEDFPLKATVFNYLAHCIRVSVSLSPCSDFSAAPVEKEEDAYCLCENERKTVSWTVTPKSLGEVEISVSAEALNGGLPCGDKVVEALSNWRKDTIIRKLLVEPEGIPRETTYNSLLCAAEKSAPSPVSLELPQNVVPDSARAYFSVLGDILGTAMHNLHQLLQMPFGCGEQNMVLFAPXXXILDYLNKTGQLKEETKSKAVGYLVSGYQRQLIYKHSDGSYSTFGPHSGQQGNTWLTAFVLKSFAQARRYMYIDSKHIQDAQLWLSSKQKENGCFRSSGMLLNNAIKGGVDDEVTLSAYITIALLEIPLPTTH…	8190	6824	1	1	1	1140.86	3419.55	3	3419.55	-0.0046	1	43.26	0.0061	K	QAQVEVYDYYEKDEFAIAEYQAPCYTVK	A
3	2::tr|A0A151NFJ9|A0A151NFJ9_ALLMI	Uncharacterized protein OS=Alligator mississippiensis OX=8496 GN=Y1Q_0018187 PE=4 SV=1	2719	84511	168	168	45	45	69	754	MPPDMKISSEETVRKYFPETWIWDLIQMDSQGNAVLTLTIPDTITEWKASAFCTSEHSGFGLSPTVSLTAFQPFFLDLTLPYSVVRGEDFPLKATVFNYLAHCIRVSVSLSPCSDFSAAPVEKEEDAYCLCENERKTVSWTVTPKSLGEVEISVSAEALNGGLPCGDKVVEALSNWRKDTIIRKLLVEPEGIPRETTYNSLLCAAEKSAPSPVSLELPQNVVPDSARAYFSVLGDILGTAMHNLHQLLQMPFGCGEQNMVLFAPXXXILDYLNKTGQLKEETKSKAVGYLVSGYQRQLIYKHSDGSYSTFGPHSGQQGNTWLTAFVLKSFAQARRYMYIDSKHIQDAQLWLSSKQKENGCFRSSGMLLNNAIKGGVDDEVTLSAYITIALLEIPLPTTH…	8191	5996	1	1	1	855.896	3419.55	4	3419.55	-0.0007	1	57.97	0.00021	K	QAQVEVYDYYEKDEFAIAEYQAPCYTVK	A
3	2::tr|A0A151NFJ9|A0A151NFJ9_ALLMI	Uncharacterized protein OS=Alligator mississippiensis OX=8496 GN=Y1Q_0018187 PE=4 SV=1	2719	84511	168	168	45	45	69	754	MPPDMKISSEETVRKYFPETWIWDLIQMDSQGNAVLTLTIPDTITEWKASAFCTSEHSGFGLSPTVSLTAFQPFFLDLTLPYSVVRGEDFPLKATVFNYLAHCIRVSVSLSPCSDFSAAPVEKEEDAYCLCENERKTVSWTVTPKSLGEVEISVSAEALNGGLPCGDKVVEALSNWRKDTIIRKLLVEPEGIPRETTYNSLLCAAEKSAPSPVSLELPQNVVPDSARAYFSVLGDILGTAMHNLHQLLQMPFGCGEQNMVLFAPXXXILDYLNKTGQLKEETKSKAVGYLVSGYQRQLIYKHSDGSYSTFGPHSGQQGNTWLTAFVLKSFAQARRYMYIDSKHIQDAQLWLSSKQKENGCFRSSGMLLNNAIKGGVDDEVTLSAYITIALLEIPLPTTH…	8192	5993	1	1	1	1140.86	3419.55	3	3419.55	-0.0006	1	70.84	1.1e-05	K	QAQVEVYDYYEKDEFAIAEYQAPCYTVK	A
3	2::tr|A0A151NFJ9|A0A151NFJ9_ALLMI	Uncharacterized protein OS=Alligator mississippiensis OX=8496 GN=Y1Q_0018187 PE=4 SV=1	2719	84511	168	168	45	45	69	754	MPPDMKISSEETVRKYFPETWIWDLIQMDSQGNAVLTLTIPDTITEWKASAFCTSEHSGFGLSPTVSLTAFQPFFLDLTLPYSVVRGEDFPLKATVFNYLAHCIRVSVSLSPCSDFSAAPVEKEEDAYCLCENERKTVSWTVTPKSLGEVEISVSAEALNGGLPCGDKVVEALSNWRKDTIIRKLLVEPEGIPRETTYNSLLCAAEKSAPSPVSLELPQNVVPDSARAYFSVLGDILGTAMHNLHQLLQMPFGCGEQNMVLFAPXXXILDYLNKTGQLKEETKSKAVGYLVSGYQRQLIYKHSDGSYSTFGPHSGQQGNTWLTAFVLKSFAQARRYMYIDSKHIQDAQLWLSSKQKENGCFRSSGMLLNNAIKGGVDDEVTLSAYITIALLEIPLPTTH…	8193	6129	1	1	1	1140.86	3419.56	3	3419.55	0.0016	1	69.62	1.5e-05	K	QAQVEVYDYYEKDEFAIAEYQAPCYTVK	A
3	2::tr|A0A151NFJ9|A0A151NFJ9_ALLMI	Uncharacterized protein OS=Alligator mississippiensis OX=8496 GN=Y1Q_0018187 PE=4 SV=1	2719	84511	168	168	45	45	69	754	MPPDMKISSEETVRKYFPETWIWDLIQMDSQGNAVLTLTIPDTITEWKASAFCTSEHSGFGLSPTVSLTAFQPFFLDLTLPYSVVRGEDFPLKATVFNYLAHCIRVSVSLSPCSDFSAAPVEKEEDAYCLCENERKTVSWTVTPKSLGEVEISVSAEALNGGLPCGDKVVEALSNWRKDTIIRKLLVEPEGIPRETTYNSLLCAAEKSAPSPVSLELPQNVVPDSARAYFSVLGDILGTAMHNLHQLLQMPFGCGEQNMVLFAPXXXILDYLNKTGQLKEETKSKAVGYLVSGYQRQLIYKHSDGSYSTFGPHSGQQGNTWLTAFVLKSFAQARRYMYIDSKHIQDAQLWLSSKQKENGCFRSSGMLLNNAIKGGVDDEVTLSAYITIALLEIPLPTTH…	8196	7171	1	1	1	1141.19	3420.55	3	3420.54	0.0082	1	32.2	0.075	K	QAQVEVYDYYEKDEFAIAEYQAPCYTVK	A
3	2::tr|A0A151NFJ9|A0A151NFJ9_ALLMI	Uncharacterized protein OS=Alligator mississippiensis OX=8496 GN=Y1Q_0018187 PE=4 SV=1	2719	84511	168	168	45	45	69	754	MPPDMKISSEETVRKYFPETWIWDLIQMDSQGNAVLTLTIPDTITEWKASAFCTSEHSGFGLSPTVSLTAFQPFFLDLTLPYSVVRGEDFPLKATVFNYLAHCIRVSVSLSPCSDFSAAPVEKEEDAYCLCENERKTVSWTVTPKSLGEVEISVSAEALNGGLPCGDKVVEALSNWRKDTIIRKLLVEPEGIPRETTYNSLLCAAEKSAPSPVSLELPQNVVPDSARAYFSVLGDILGTAMHNLHQLLQMPFGCGEQNMVLFAPXXXILDYLNKTGQLKEETKSKAVGYLVSGYQRQLIYKHSDGSYSTFGPHSGQQGNTWLTAFVLKSFAQARRYMYIDSKHIQDAQLWLSSKQKENGCFRSSGMLLNNAIKGGVDDEVTLSAYITIALLEIPLPTTH…	8197	6559	1	1	1	1141.19	3420.56	3	3420.54	0.0199	1	35.58	0.037	K	QAQVEVYDYYEKDEFAIAEYQAPCYTVK	A
3	2::tr|A0A151NFJ9|A0A151NFJ9_ALLMI	Uncharacterized protein OS=Alligator mississippiensis OX=8496 GN=Y1Q_0018187 PE=4 SV=1	2719	84511	168	168	45	45	69	754	MPPDMKISSEETVRKYFPETWIWDLIQMDSQGNAVLTLTIPDTITEWKASAFCTSEHSGFGLSPTVSLTAFQPFFLDLTLPYSVVRGEDFPLKATVFNYLAHCIRVSVSLSPCSDFSAAPVEKEEDAYCLCENERKTVSWTVTPKSLGEVEISVSAEALNGGLPCGDKVVEALSNWRKDTIIRKLLVEPEGIPRETTYNSLLCAAEKSAPSPVSLELPQNVVPDSARAYFSVLGDILGTAMHNLHQLLQMPFGCGEQNMVLFAPXXXILDYLNKTGQLKEETKSKAVGYLVSGYQRQLIYKHSDGSYSTFGPHSGQQGNTWLTAFVLKSFAQARRYMYIDSKHIQDAQLWLSSKQKENGCFRSSGMLLNNAIKGGVDDEVTLSAYITIALLEIPLPTTH…	8198	6960	1	1	1	1141.19	3420.56	3	3420.54	0.0214	1	25.01	0.42	K	QAQVEVYDYYEKDEFAIAEYQAPCYTVK	A
3	2::tr|A0A151NFJ9|A0A151NFJ9_ALLMI	Uncharacterized protein OS=Alligator mississippiensis OX=8496 GN=Y1Q_0018187 PE=4 SV=1	2719	84511	168	168	45	45	69	754	MPPDMKISSEETVRKYFPETWIWDLIQMDSQGNAVLTLTIPDTITEWKASAFCTSEHSGFGLSPTVSLTAFQPFFLDLTLPYSVVRGEDFPLKATVFNYLAHCIRVSVSLSPCSDFSAAPVEKEEDAYCLCENERKTVSWTVTPKSLGEVEISVSAEALNGGLPCGDKVVEALSNWRKDTIIRKLLVEPEGIPRETTYNSLLCAAEKSAPSPVSLELPQNVVPDSARAYFSVLGDILGTAMHNLHQLLQMPFGCGEQNMVLFAPXXXILDYLNKTGQLKEETKSKAVGYLVSGYQRQLIYKHSDGSYSTFGPHSGQQGNTWLTAFVLKSFAQARRYMYIDSKHIQDAQLWLSSKQKENGCFRSSGMLLNNAIKGGVDDEVTLSAYITIALLEIPLPTTH…	8223	5288	1	1	1	862.877	3447.48	4	3447.49	-0.0127	1	32.84	0.027	R	VSVSLSPCSDFSAAPVEKEEDAYCLCENER	K
3	2::tr|A0A151NFJ9|A0A151NFJ9_ALLMI	Uncharacterized protein OS=Alligator mississippiensis OX=8496 GN=Y1Q_0018187 PE=4 SV=1	2719	84511	168	168	45	45	69	754	MPPDMKISSEETVRKYFPETWIWDLIQMDSQGNAVLTLTIPDTITEWKASAFCTSEHSGFGLSPTVSLTAFQPFFLDLTLPYSVVRGEDFPLKATVFNYLAHCIRVSVSLSPCSDFSAAPVEKEEDAYCLCENERKTVSWTVTPKSLGEVEISVSAEALNGGLPCGDKVVEALSNWRKDTIIRKLLVEPEGIPRETTYNSLLCAAEKSAPSPVSLELPQNVVPDSARAYFSVLGDILGTAMHNLHQLLQMPFGCGEQNMVLFAPXXXILDYLNKTGQLKEETKSKAVGYLVSGYQRQLIYKHSDGSYSTFGPHSGQQGNTWLTAFVLKSFAQARRYMYIDSKHIQDAQLWLSSKQKENGCFRSSGMLLNNAIKGGVDDEVTLSAYITIALLEIPLPTTH…	8224	5276	1	1	1	1150.17	3447.48	3	3447.49	-0.008	1	36.46	0.013	R	VSVSLSPCSDFSAAPVEKEEDAYCLCENER	K
3	2::tr|A0A151NFJ9|A0A151NFJ9_ALLMI	Uncharacterized protein OS=Alligator mississippiensis OX=8496 GN=Y1Q_0018187 PE=4 SV=1	2719	84511	168	168	45	45	69	754	MPPDMKISSEETVRKYFPETWIWDLIQMDSQGNAVLTLTIPDTITEWKASAFCTSEHSGFGLSPTVSLTAFQPFFLDLTLPYSVVRGEDFPLKATVFNYLAHCIRVSVSLSPCSDFSAAPVEKEEDAYCLCENERKTVSWTVTPKSLGEVEISVSAEALNGGLPCGDKVVEALSNWRKDTIIRKLLVEPEGIPRETTYNSLLCAAEKSAPSPVSLELPQNVVPDSARAYFSVLGDILGTAMHNLHQLLQMPFGCGEQNMVLFAPXXXILDYLNKTGQLKEETKSKAVGYLVSGYQRQLIYKHSDGSYSTFGPHSGQQGNTWLTAFVLKSFAQARRYMYIDSKHIQDAQLWLSSKQKENGCFRSSGMLLNNAIKGGVDDEVTLSAYITIALLEIPLPTTH…	8460	7279	1	1	1	942.739	3766.93	4	3766.93	-0.0089	0	57.3	0.00019	R	APSAEVEMTAYALLAHLTTQPAPSQEDLTTASLIVK	W
3	2::tr|A0A151NFJ9|A0A151NFJ9_ALLMI	Uncharacterized protein OS=Alligator mississippiensis OX=8496 GN=Y1Q_0018187 PE=4 SV=1	2719	84511	168	168	45	45	69	754	MPPDMKISSEETVRKYFPETWIWDLIQMDSQGNAVLTLTIPDTITEWKASAFCTSEHSGFGLSPTVSLTAFQPFFLDLTLPYSVVRGEDFPLKATVFNYLAHCIRVSVSLSPCSDFSAAPVEKEEDAYCLCENERKTVSWTVTPKSLGEVEISVSAEALNGGLPCGDKVVEALSNWRKDTIIRKLLVEPEGIPRETTYNSLLCAAEKSAPSPVSLELPQNVVPDSARAYFSVLGDILGTAMHNLHQLLQMPFGCGEQNMVLFAPXXXILDYLNKTGQLKEETKSKAVGYLVSGYQRQLIYKHSDGSYSTFGPHSGQQGNTWLTAFVLKSFAQARRYMYIDSKHIQDAQLWLSSKQKENGCFRSSGMLLNNAIKGGVDDEVTLSAYITIALLEIPLPTTH…	8463	7276	1	1	1	1256.65	3766.93	3	3766.93	0.0002	0	39.88	0.0096	R	APSAEVEMTAYALLAHLTTQPAPSQEDLTTASLIVK	W
3	2::tr|A0A151NFJ9|A0A151NFJ9_ALLMI	Uncharacterized protein OS=Alligator mississippiensis OX=8496 GN=Y1Q_0018187 PE=4 SV=1	2719	84511	168	168	45	45	69	754	MPPDMKISSEETVRKYFPETWIWDLIQMDSQGNAVLTLTIPDTITEWKASAFCTSEHSGFGLSPTVSLTAFQPFFLDLTLPYSVVRGEDFPLKATVFNYLAHCIRVSVSLSPCSDFSAAPVEKEEDAYCLCENERKTVSWTVTPKSLGEVEISVSAEALNGGLPCGDKVVEALSNWRKDTIIRKLLVEPEGIPRETTYNSLLCAAEKSAPSPVSLELPQNVVPDSARAYFSVLGDILGTAMHNLHQLLQMPFGCGEQNMVLFAPXXXILDYLNKTGQLKEETKSKAVGYLVSGYQRQLIYKHSDGSYSTFGPHSGQQGNTWLTAFVLKSFAQARRYMYIDSKHIQDAQLWLSSKQKENGCFRSSGMLLNNAIKGGVDDEVTLSAYITIALLEIPLPTTH…	8472	7409	1	1	1	942.989	3767.93	4	3767.92	0.0108	0	54.63	0.00035	R	APSAEVEMTAYALLAHLTTQPAPSQEDLTTASLIVK	W
3	2::tr|A0A151NFJ9|A0A151NFJ9_ALLMI	Uncharacterized protein OS=Alligator mississippiensis OX=8496 GN=Y1Q_0018187 PE=4 SV=1	2719	84511	168	168	45	45	69	754	MPPDMKISSEETVRKYFPETWIWDLIQMDSQGNAVLTLTIPDTITEWKASAFCTSEHSGFGLSPTVSLTAFQPFFLDLTLPYSVVRGEDFPLKATVFNYLAHCIRVSVSLSPCSDFSAAPVEKEEDAYCLCENERKTVSWTVTPKSLGEVEISVSAEALNGGLPCGDKVVEALSNWRKDTIIRKLLVEPEGIPRETTYNSLLCAAEKSAPSPVSLELPQNVVPDSARAYFSVLGDILGTAMHNLHQLLQMPFGCGEQNMVLFAPXXXILDYLNKTGQLKEETKSKAVGYLVSGYQRQLIYKHSDGSYSTFGPHSGQQGNTWLTAFVLKSFAQARRYMYIDSKHIQDAQLWLSSKQKENGCFRSSGMLLNNAIKGGVDDEVTLSAYITIALLEIPLPTTH…	8486	7345	1	1	1	943.244	3768.95	4	3768.9	0.0436	0	46.93	0.0019	R	APSAEVEMTAYALLAHLTTQPAPSQEDLTTASLIVK	W
3	2::tr|A0A151NFJ9|A0A151NFJ9_ALLMI	Uncharacterized protein OS=Alligator mississippiensis OX=8496 GN=Y1Q_0018187 PE=4 SV=1	2719	84511	168	168	45	45	69	754	MPPDMKISSEETVRKYFPETWIWDLIQMDSQGNAVLTLTIPDTITEWKASAFCTSEHSGFGLSPTVSLTAFQPFFLDLTLPYSVVRGEDFPLKATVFNYLAHCIRVSVSLSPCSDFSAAPVEKEEDAYCLCENERKTVSWTVTPKSLGEVEISVSAEALNGGLPCGDKVVEALSNWRKDTIIRKLLVEPEGIPRETTYNSLLCAAEKSAPSPVSLELPQNVVPDSARAYFSVLGDILGTAMHNLHQLLQMPFGCGEQNMVLFAPXXXILDYLNKTGQLKEETKSKAVGYLVSGYQRQLIYKHSDGSYSTFGPHSGQQGNTWLTAFVLKSFAQARRYMYIDSKHIQDAQLWLSSKQKENGCFRSSGMLLNNAIKGGVDDEVTLSAYITIALLEIPLPTTH…	8626	7281	1	1	1	1351.69	4052.05	3	4052.03	0.0169	1	64.24	3.9e-05	R	KYFPETWIWDLIQMDSQGNAVLTLTIPDTITEWK	A
4	1::sp|cRAP087|P02769|ALBU_BOVIN	Serum albumin OS=Bos taurus GN=ALB PE=1 SV=4	2158	71244	70	70	40	40	68.2	607	MKWVTFISLLLLFSSAYSRGVFRRDTHKSEIAHRFKDLGEEHFKGLVLIAFSQYLQQCPFDEHVKLVNELTEFAKTCVADESHAGCEKSLHTLFGDELCKVASLRETYGDMADCCEKQEPERNECFLSHKDDSPDLPKLKPDPNTLCDEFKADEKKFWGKYLYEIARRHPYFYAPELLYYANKYNGVFQECCQAEDKGACLLPKIETMREKVLASSARQRLRCASIQKFGERALKAWSVARLSQKFPKAEFVEVTKLVTDLTKVHKECCHGDLLECADDRADLAKYICDNQDTISSKLKECCDKPLLEKSHCIAEVEKDAIPENLPPLTADFAEDKDVCKNYQEAKDAFLGSFLYEYSRRHPEYAVSVLLRLAKEYEATLEECCAKDDPHACYSTVFDK…	80	3012	1	1	0	395.239	788.464	2	788.464	-0.0006	0	38.94	0.0035	K	LVTDLTK	V
4	1::sp|cRAP087|P02769|ALBU_BOVIN	Serum albumin OS=Bos taurus GN=ALB PE=1 SV=4	2158	71244	70	70	40	40	68.2	607	MKWVTFISLLLLFSSAYSRGVFRRDTHKSEIAHRFKDLGEEHFKGLVLIAFSQYLQQCPFDEHVKLVNELTEFAKTCVADESHAGCEKSLHTLFGDELCKVASLRETYGDMADCCEKQEPERNECFLSHKDDSPDLPKLKPDPNTLCDEFKADEKKFWGKYLYEIARRHPYFYAPELLYYANKYNGVFQECCQAEDKGACLLPKIETMREKVLASSARQRLRCASIQKFGERALKAWSVARLSQKFPKAEFVEVTKLVTDLTKVHKECCHGDLLECADDRADLAKYICDNQDTISSKLKECCDKPLLEKSHCIAEVEKDAIPENLPPLTADFAEDKDVCKNYQEAKDAFLGSFLYEYSRRHPEYAVSVLLRLAKEYEATLEECCAKDDPHACYSTVFDK…	81	2843	1	1	0	395.239	788.464	2	788.464	-0.0005	0	41.3	0.0021	K	LVTDLTK	V
4	1::sp|cRAP087|P02769|ALBU_BOVIN	Serum albumin OS=Bos taurus GN=ALB PE=1 SV=4	2158	71244	70	70	40	40	68.2	607	MKWVTFISLLLLFSSAYSRGVFRRDTHKSEIAHRFKDLGEEHFKGLVLIAFSQYLQQCPFDEHVKLVNELTEFAKTCVADESHAGCEKSLHTLFGDELCKVASLRETYGDMADCCEKQEPERNECFLSHKDDSPDLPKLKPDPNTLCDEFKADEKKFWGKYLYEIARRHPYFYAPELLYYANKYNGVFQECCQAEDKGACLLPKIETMREKVLASSARQRLRCASIQKFGERALKAWSVARLSQKFPKAEFVEVTKLVTDLTKVHKECCHGDLLECADDRADLAKYICDNQDTISSKLKECCDKPLLEKSHCIAEVEKDAIPENLPPLTADFAEDKDVCKNYQEAKDAFLGSFLYEYSRRHPEYAVSVLLRLAKEYEATLEECCAKDDPHACYSTVFDK…	204	976	1	1	1	409.716	817.418	2	817.418	-0.0006	0	35.24	0.029	K	ATEEQLK	T
4	1::sp|cRAP087|P02769|ALBU_BOVIN	Serum albumin OS=Bos taurus GN=ALB PE=1 SV=4	2158	71244	70	70	40	40	68.2	607	MKWVTFISLLLLFSSAYSRGVFRRDTHKSEIAHRFKDLGEEHFKGLVLIAFSQYLQQCPFDEHVKLVNELTEFAKTCVADESHAGCEKSLHTLFGDELCKVASLRETYGDMADCCEKQEPERNECFLSHKDDSPDLPKLKPDPNTLCDEFKADEKKFWGKYLYEIARRHPYFYAPELLYYANKYNGVFQECCQAEDKGACLLPKIETMREKVLASSARQRLRCASIQKFGERALKAWSVARLSQKFPKAEFVEVTKLVTDLTKVHKECCHGDLLECADDRADLAKYICDNQDTISSKLKECCDKPLLEKSHCIAEVEKDAIPENLPPLTADFAEDKDVCKNYQEAKDAFLGSFLYEYSRRHPEYAVSVLLRLAKEYEATLEECCAKDDPHACYSTVFDK…	337	1500	1	1	1	424.255	846.496	2	846.496	0.0001	1	40.31	0.004	R	LSQKFPK	A
4	1::sp|cRAP087|P02769|ALBU_BOVIN	Serum albumin OS=Bos taurus GN=ALB PE=1 SV=4	2158	71244	70	70	40	40	68.2	607	MKWVTFISLLLLFSSAYSRGVFRRDTHKSEIAHRFKDLGEEHFKGLVLIAFSQYLQQCPFDEHVKLVNELTEFAKTCVADESHAGCEKSLHTLFGDELCKVASLRETYGDMADCCEKQEPERNECFLSHKDDSPDLPKLKPDPNTLCDEFKADEKKFWGKYLYEIARRHPYFYAPELLYYANKYNGVFQECCQAEDKGACLLPKIETMREKVLASSARQRLRCASIQKFGERALKAWSVARLSQKFPKAEFVEVTKLVTDLTKVHKECCHGDLLECADDRADLAKYICDNQDTISSKLKECCDKPLLEKSHCIAEVEKDAIPENLPPLTADFAEDKDVCKNYQEAKDAFLGSFLYEYSRRHPEYAVSVLLRLAKEYEATLEECCAKDDPHACYSTVFDK…	486	1960	1	1	1	449.744	897.474	2	897.474	-0.0005	0	29.73	0.04	R	LCVLHEK	T
4	1::sp|cRAP087|P02769|ALBU_BOVIN	Serum albumin OS=Bos taurus GN=ALB PE=1 SV=4	2158	71244	70	70	40	40	68.2	607	MKWVTFISLLLLFSSAYSRGVFRRDTHKSEIAHRFKDLGEEHFKGLVLIAFSQYLQQCPFDEHVKLVNELTEFAKTCVADESHAGCEKSLHTLFGDELCKVASLRETYGDMADCCEKQEPERNECFLSHKDDSPDLPKLKPDPNTLCDEFKADEKKFWGKYLYEIARRHPYFYAPELLYYANKYNGVFQECCQAEDKGACLLPKIETMREKVLASSARQRLRCASIQKFGERALKAWSVARLSQKFPKAEFVEVTKLVTDLTKVHKECCHGDLLECADDRADLAKYICDNQDTISSKLKECCDKPLLEKSHCIAEVEKDAIPENLPPLTADFAEDKDVCKNYQEAKDAFLGSFLYEYSRRHPEYAVSVLLRLAKEYEATLEECCAKDDPHACYSTVFDK…	570	3065	1	1	1	461.747	921.48	2	921.481	-0.0005	0	49.21	0.00085	K	AEFVEVTK	L
4	1::sp|cRAP087|P02769|ALBU_BOVIN	Serum albumin OS=Bos taurus GN=ALB PE=1 SV=4	2158	71244	70	70	40	40	68.2	607	MKWVTFISLLLLFSSAYSRGVFRRDTHKSEIAHRFKDLGEEHFKGLVLIAFSQYLQQCPFDEHVKLVNELTEFAKTCVADESHAGCEKSLHTLFGDELCKVASLRETYGDMADCCEKQEPERNECFLSHKDDSPDLPKLKPDPNTLCDEFKADEKKFWGKYLYEIARRHPYFYAPELLYYANKYNGVFQECCQAEDKGACLLPKIETMREKVLASSARQRLRCASIQKFGERALKAWSVARLSQKFPKAEFVEVTKLVTDLTKVHKECCHGDLLECADDRADLAKYICDNQDTISSKLKECCDKPLLEKSHCIAEVEKDAIPENLPPLTADFAEDKDVCKNYQEAKDAFLGSFLYEYSRRHPEYAVSVLLRLAKEYEATLEECCAKDDPHACYSTVFDK…	577	4008	1	1	0	464.25	926.486	2	926.486	-0.0003	0	32.1	0.028	K	YLYEIAR	R
4	1::sp|cRAP087|P02769|ALBU_BOVIN	Serum albumin OS=Bos taurus GN=ALB PE=1 SV=4	2158	71244	70	70	40	40	68.2	607	MKWVTFISLLLLFSSAYSRGVFRRDTHKSEIAHRFKDLGEEHFKGLVLIAFSQYLQQCPFDEHVKLVNELTEFAKTCVADESHAGCEKSLHTLFGDELCKVASLRETYGDMADCCEKQEPERNECFLSHKDDSPDLPKLKPDPNTLCDEFKADEKKFWGKYLYEIARRHPYFYAPELLYYANKYNGVFQECCQAEDKGACLLPKIETMREKVLASSARQRLRCASIQKFGERALKAWSVARLSQKFPKAEFVEVTKLVTDLTKVHKECCHGDLLECADDRADLAKYICDNQDTISSKLKECCDKPLLEKSHCIAEVEKDAIPENLPPLTADFAEDKDVCKNYQEAKDAFLGSFLYEYSRRHPEYAVSVLLRLAKEYEATLEECCAKDDPHACYSTVFDK…	800	2394	1	1	1	487.732	973.449	2	973.451	-0.001	0	29.63	0.048	K	DLGEEHFK	G
4	1::sp|cRAP087|P02769|ALBU_BOVIN	Serum albumin OS=Bos taurus GN=ALB PE=1 SV=4	2158	71244	70	70	40	40	68.2	607	MKWVTFISLLLLFSSAYSRGVFRRDTHKSEIAHRFKDLGEEHFKGLVLIAFSQYLQQCPFDEHVKLVNELTEFAKTCVADESHAGCEKSLHTLFGDELCKVASLRETYGDMADCCEKQEPERNECFLSHKDDSPDLPKLKPDPNTLCDEFKADEKKFWGKYLYEIARRHPYFYAPELLYYANKYNGVFQECCQAEDKGACLLPKIETMREKVLASSARQRLRCASIQKFGERALKAWSVARLSQKFPKAEFVEVTKLVTDLTKVHKECCHGDLLECADDRADLAKYICDNQDTISSKLKECCDKPLLEKSHCIAEVEKDAIPENLPPLTADFAEDKDVCKNYQEAKDAFLGSFLYEYSRRHPEYAVSVLLRLAKEYEATLEECCAKDDPHACYSTVFDK…	1211	1351	1	1	1	534.724	1067.43	2	1067.43	-0.0008	0	46.95	0.00044	K	QNCDQFEK	L
4	1::sp|cRAP087|P02769|ALBU_BOVIN	Serum albumin OS=Bos taurus GN=ALB PE=1 SV=4	2158	71244	70	70	40	40	68.2	607	MKWVTFISLLLLFSSAYSRGVFRRDTHKSEIAHRFKDLGEEHFKGLVLIAFSQYLQQCPFDEHVKLVNELTEFAKTCVADESHAGCEKSLHTLFGDELCKVASLRETYGDMADCCEKQEPERNECFLSHKDDSPDLPKLKPDPNTLCDEFKADEKKFWGKYLYEIARRHPYFYAPELLYYANKYNGVFQECCQAEDKGACLLPKIETMREKVLASSARQRLRCASIQKFGERALKAWSVARLSQKFPKAEFVEVTKLVTDLTKVHKECCHGDLLECADDRADLAKYICDNQDTISSKLKECCDKPLLEKSHCIAEVEKDAIPENLPPLTADFAEDKDVCKNYQEAKDAFLGSFLYEYSRRHPEYAVSVLLRLAKEYEATLEECCAKDDPHACYSTVFDK…	1216	1408	1	1	1	536.758	1071.5	2	1071.5	-0.0006	0	30.99	0.042	K	SHCIAEVEK	D
4	1::sp|cRAP087|P02769|ALBU_BOVIN	Serum albumin OS=Bos taurus GN=ALB PE=1 SV=4	2158	71244	70	70	40	40	68.2	607	MKWVTFISLLLLFSSAYSRGVFRRDTHKSEIAHRFKDLGEEHFKGLVLIAFSQYLQQCPFDEHVKLVNELTEFAKTCVADESHAGCEKSLHTLFGDELCKVASLRETYGDMADCCEKQEPERNECFLSHKDDSPDLPKLKPDPNTLCDEFKADEKKFWGKYLYEIARRHPYFYAPELLYYANKYNGVFQECCQAEDKGACLLPKIETMREKVLASSARQRLRCASIQKFGERALKAWSVARLSQKFPKAEFVEVTKLVTDLTKVHKECCHGDLLECADDRADLAKYICDNQDTISSKLKECCDKPLLEKSHCIAEVEKDAIPENLPPLTADFAEDKDVCKNYQEAKDAFLGSFLYEYSRRHPEYAVSVLLRLAKEYEATLEECCAKDDPHACYSTVFDK…	1523	4655	1	1	1	571.86	1141.71	2	1141.71	-0.0017	1	22.64	0.089	K	KQTALVELLK	H
4	1::sp|cRAP087|P02769|ALBU_BOVIN	Serum albumin OS=Bos taurus GN=ALB PE=1 SV=4	2158	71244	70	70	40	40	68.2	607	MKWVTFISLLLLFSSAYSRGVFRRDTHKSEIAHRFKDLGEEHFKGLVLIAFSQYLQQCPFDEHVKLVNELTEFAKTCVADESHAGCEKSLHTLFGDELCKVASLRETYGDMADCCEKQEPERNECFLSHKDDSPDLPKLKPDPNTLCDEFKADEKKFWGKYLYEIARRHPYFYAPELLYYANKYNGVFQECCQAEDKGACLLPKIETMREKVLASSARQRLRCASIQKFGERALKAWSVARLSQKFPKAEFVEVTKLVTDLTKVHKECCHGDLLECADDRADLAKYICDNQDTISSKLKECCDKPLLEKSHCIAEVEKDAIPENLPPLTADFAEDKDVCKNYQEAKDAFLGSFLYEYSRRHPEYAVSVLLRLAKEYEATLEECCAKDDPHACYSTVFDK…	1647	4991	1	1	1	582.319	1162.62	2	1162.62	0	0	63.97	3.5e-05	K	LVNELTEFAK	T
4	1::sp|cRAP087|P02769|ALBU_BOVIN	Serum albumin OS=Bos taurus GN=ALB PE=1 SV=4	2158	71244	70	70	40	40	68.2	607	MKWVTFISLLLLFSSAYSRGVFRRDTHKSEIAHRFKDLGEEHFKGLVLIAFSQYLQQCPFDEHVKLVNELTEFAKTCVADESHAGCEKSLHTLFGDELCKVASLRETYGDMADCCEKQEPERNECFLSHKDDSPDLPKLKPDPNTLCDEFKADEKKFWGKYLYEIARRHPYFYAPELLYYANKYNGVFQECCQAEDKGACLLPKIETMREKVLASSARQRLRCASIQKFGERALKAWSVARLSQKFPKAEFVEVTKLVTDLTKVHKECCHGDLLECADDRADLAKYICDNQDTISSKLKECCDKPLLEKSHCIAEVEKDAIPENLPPLTADFAEDKDVCKNYQEAKDAFLGSFLYEYSRRHPEYAVSVLLRLAKEYEATLEECCAKDDPHACYSTVFDK…	1657	427	1	1	1	389.502	1165.48	3	1165.49	-0.001	0	34.02	0.014	R	CCTKPESER	M
4	1::sp|cRAP087|P02769|ALBU_BOVIN	Serum albumin OS=Bos taurus GN=ALB PE=1 SV=4	2158	71244	70	70	40	40	68.2	607	MKWVTFISLLLLFSSAYSRGVFRRDTHKSEIAHRFKDLGEEHFKGLVLIAFSQYLQQCPFDEHVKLVNELTEFAKTCVADESHAGCEKSLHTLFGDELCKVASLRETYGDMADCCEKQEPERNECFLSHKDDSPDLPKLKPDPNTLCDEFKADEKKFWGKYLYEIARRHPYFYAPELLYYANKYNGVFQECCQAEDKGACLLPKIETMREKVLASSARQRLRCASIQKFGERALKAWSVARLSQKFPKAEFVEVTKLVTDLTKVHKECCHGDLLECADDRADLAKYICDNQDTISSKLKECCDKPLLEKSHCIAEVEKDAIPENLPPLTADFAEDKDVCKNYQEAKDAFLGSFLYEYSRRHPEYAVSVLLRLAKEYEATLEECCAKDDPHACYSTVFDK…	2011	3649	1	1	1	417.212	1248.61	3	1248.61	-0.001	1	53.42	0.00059	R	FKDLGEEHFK	G
4	1::sp|cRAP087|P02769|ALBU_BOVIN	Serum albumin OS=Bos taurus GN=ALB PE=1 SV=4	2158	71244	70	70	40	40	68.2	607	MKWVTFISLLLLFSSAYSRGVFRRDTHKSEIAHRFKDLGEEHFKGLVLIAFSQYLQQCPFDEHVKLVNELTEFAKTCVADESHAGCEKSLHTLFGDELCKVASLRETYGDMADCCEKQEPERNECFLSHKDDSPDLPKLKPDPNTLCDEFKADEKKFWGKYLYEIARRHPYFYAPELLYYANKYNGVFQECCQAEDKGACLLPKIETMREKVLASSARQRLRCASIQKFGERALKAWSVARLSQKFPKAEFVEVTKLVTDLTKVHKECCHGDLLECADDRADLAKYICDNQDTISSKLKECCDKPLLEKSHCIAEVEKDAIPENLPPLTADFAEDKDVCKNYQEAKDAFLGSFLYEYSRRHPEYAVSVLLRLAKEYEATLEECCAKDDPHACYSTVFDK…	2012	3784	1	1	1	417.212	1248.61	3	1248.61	-0.0008	1	34.66	0.042	R	FKDLGEEHFK	G
4	1::sp|cRAP087|P02769|ALBU_BOVIN	Serum albumin OS=Bos taurus GN=ALB PE=1 SV=4	2158	71244	70	70	40	40	68.2	607	MKWVTFISLLLLFSSAYSRGVFRRDTHKSEIAHRFKDLGEEHFKGLVLIAFSQYLQQCPFDEHVKLVNELTEFAKTCVADESHAGCEKSLHTLFGDELCKVASLRETYGDMADCCEKQEPERNECFLSHKDDSPDLPKLKPDPNTLCDEFKADEKKFWGKYLYEIARRHPYFYAPELLYYANKYNGVFQECCQAEDKGACLLPKIETMREKVLASSARQRLRCASIQKFGERALKAWSVARLSQKFPKAEFVEVTKLVTDLTKVHKECCHGDLLECADDRADLAKYICDNQDTISSKLKECCDKPLLEKSHCIAEVEKDAIPENLPPLTADFAEDKDVCKNYQEAKDAFLGSFLYEYSRRHPEYAVSVLLRLAKEYEATLEECCAKDDPHACYSTVFDK…	2192	1915	1	1	1	431.205	1290.59	3	1290.59	-0.0001	0	33.91	0.041	K	ECCDKPLLEK	S
4	1::sp|cRAP087|P02769|ALBU_BOVIN	Serum albumin OS=Bos taurus GN=ALB PE=1 SV=4	2158	71244	70	70	40	40	68.2	607	MKWVTFISLLLLFSSAYSRGVFRRDTHKSEIAHRFKDLGEEHFKGLVLIAFSQYLQQCPFDEHVKLVNELTEFAKTCVADESHAGCEKSLHTLFGDELCKVASLRETYGDMADCCEKQEPERNECFLSHKDDSPDLPKLKPDPNTLCDEFKADEKKFWGKYLYEIARRHPYFYAPELLYYANKYNGVFQECCQAEDKGACLLPKIETMREKVLASSARQRLRCASIQKFGERALKAWSVARLSQKFPKAEFVEVTKLVTDLTKVHKECCHGDLLECADDRADLAKYICDNQDTISSKLKECCDKPLLEKSHCIAEVEKDAIPENLPPLTADFAEDKDVCKNYQEAKDAFLGSFLYEYSRRHPEYAVSVLLRLAKEYEATLEECCAKDDPHACYSTVFDK…	2193	1918	1	1	1	646.305	1290.59	2	1290.59	0.0002	0	61.61	7e-05	K	ECCDKPLLEK	S
4	1::sp|cRAP087|P02769|ALBU_BOVIN	Serum albumin OS=Bos taurus GN=ALB PE=1 SV=4	2158	71244	70	70	40	40	68.2	607	MKWVTFISLLLLFSSAYSRGVFRRDTHKSEIAHRFKDLGEEHFKGLVLIAFSQYLQQCPFDEHVKLVNELTEFAKTCVADESHAGCEKSLHTLFGDELCKVASLRETYGDMADCCEKQEPERNECFLSHKDDSPDLPKLKPDPNTLCDEFKADEKKFWGKYLYEIARRHPYFYAPELLYYANKYNGVFQECCQAEDKGACLLPKIETMREKVLASSARQRLRCASIQKFGERALKAWSVARLSQKFPKAEFVEVTKLVTDLTKVHKECCHGDLLECADDRADLAKYICDNQDTISSKLKECCDKPLLEKSHCIAEVEKDAIPENLPPLTADFAEDKDVCKNYQEAKDAFLGSFLYEYSRRHPEYAVSVLLRLAKEYEATLEECCAKDDPHACYSTVFDK…	2279	3728	1	1	1	653.361	1304.71	2	1304.71	-0.0011	0	35.98	0.021	K	HLVDEPQNLIK	Q
4	1::sp|cRAP087|P02769|ALBU_BOVIN	Serum albumin OS=Bos taurus GN=ALB PE=1 SV=4	2158	71244	70	70	40	40	68.2	607	MKWVTFISLLLLFSSAYSRGVFRRDTHKSEIAHRFKDLGEEHFKGLVLIAFSQYLQQCPFDEHVKLVNELTEFAKTCVADESHAGCEKSLHTLFGDELCKVASLRETYGDMADCCEKQEPERNECFLSHKDDSPDLPKLKPDPNTLCDEFKADEKKFWGKYLYEIARRHPYFYAPELLYYANKYNGVFQECCQAEDKGACLLPKIETMREKVLASSARQRLRCASIQKFGERALKAWSVARLSQKFPKAEFVEVTKLVTDLTKVHKECCHGDLLECADDRADLAKYICDNQDTISSKLKECCDKPLLEKSHCIAEVEKDAIPENLPPLTADFAEDKDVCKNYQEAKDAFLGSFLYEYSRRHPEYAVSVLLRLAKEYEATLEECCAKDDPHACYSTVFDK…	2280	3585	1	1	1	653.361	1304.71	2	1304.71	-0.0005	0	61.23	6.5e-05	K	HLVDEPQNLIK	Q
4	1::sp|cRAP087|P02769|ALBU_BOVIN	Serum albumin OS=Bos taurus GN=ALB PE=1 SV=4	2158	71244	70	70	40	40	68.2	607	MKWVTFISLLLLFSSAYSRGVFRRDTHKSEIAHRFKDLGEEHFKGLVLIAFSQYLQQCPFDEHVKLVNELTEFAKTCVADESHAGCEKSLHTLFGDELCKVASLRETYGDMADCCEKQEPERNECFLSHKDDSPDLPKLKPDPNTLCDEFKADEKKFWGKYLYEIARRHPYFYAPELLYYANKYNGVFQECCQAEDKGACLLPKIETMREKVLASSARQRLRCASIQKFGERALKAWSVARLSQKFPKAEFVEVTKLVTDLTKVHKECCHGDLLECADDRADLAKYICDNQDTISSKLKECCDKPLLEKSHCIAEVEKDAIPENLPPLTADFAEDKDVCKNYQEAKDAFLGSFLYEYSRRHPEYAVSVLLRLAKEYEATLEECCAKDDPHACYSTVFDK…	2793	6803	1	1	1	700.35	1398.68	2	1398.69	-0.0009	0	64.23	3.8e-05	K	TVMENFVAFVDK	C
4	1::sp|cRAP087|P02769|ALBU_BOVIN	Serum albumin OS=Bos taurus GN=ALB PE=1 SV=4	2158	71244	70	70	40	40	68.2	607	MKWVTFISLLLLFSSAYSRGVFRRDTHKSEIAHRFKDLGEEHFKGLVLIAFSQYLQQCPFDEHVKLVNELTEFAKTCVADESHAGCEKSLHTLFGDELCKVASLRETYGDMADCCEKQEPERNECFLSHKDDSPDLPKLKPDPNTLCDEFKADEKKFWGKYLYEIARRHPYFYAPELLYYANKYNGVFQECCQAEDKGACLLPKIETMREKVLASSARQRLRCASIQKFGERALKAWSVARLSQKFPKAEFVEVTKLVTDLTKVHKECCHGDLLECADDRADLAKYICDNQDTISSKLKECCDKPLLEKSHCIAEVEKDAIPENLPPLTADFAEDKDVCKNYQEAKDAFLGSFLYEYSRRHPEYAVSVLLRLAKEYEATLEECCAKDDPHACYSTVFDK…	2869	5581	1	1	1	708.347	1414.68	2	1414.68	-0.0012	0	68.18	1.6e-05	K	TVMENFVAFVDK	C
4	1::sp|cRAP087|P02769|ALBU_BOVIN	Serum albumin OS=Bos taurus GN=ALB PE=1 SV=4	2158	71244	70	70	40	40	68.2	607	MKWVTFISLLLLFSSAYSRGVFRRDTHKSEIAHRFKDLGEEHFKGLVLIAFSQYLQQCPFDEHVKLVNELTEFAKTCVADESHAGCEKSLHTLFGDELCKVASLRETYGDMADCCEKQEPERNECFLSHKDDSPDLPKLKPDPNTLCDEFKADEKKFWGKYLYEIARRHPYFYAPELLYYANKYNGVFQECCQAEDKGACLLPKIETMREKVLASSARQRLRCASIQKFGERALKAWSVARLSQKFPKAEFVEVTKLVTDLTKVHKECCHGDLLECADDRADLAKYICDNQDTISSKLKECCDKPLLEKSHCIAEVEKDAIPENLPPLTADFAEDKDVCKNYQEAKDAFLGSFLYEYSRRHPEYAVSVLLRLAKEYEATLEECCAKDDPHACYSTVFDK…	2882	4917	1	1	1	710.35	1418.69	2	1418.69	-0.0005	0	72.4	7.8e-06	K	SLHTLFGDELCK	V
4	1::sp|cRAP087|P02769|ALBU_BOVIN	Serum albumin OS=Bos taurus GN=ALB PE=1 SV=4	2158	71244	70	70	40	40	68.2	607	MKWVTFISLLLLFSSAYSRGVFRRDTHKSEIAHRFKDLGEEHFKGLVLIAFSQYLQQCPFDEHVKLVNELTEFAKTCVADESHAGCEKSLHTLFGDELCKVASLRETYGDMADCCEKQEPERNECFLSHKDDSPDLPKLKPDPNTLCDEFKADEKKFWGKYLYEIARRHPYFYAPELLYYANKYNGVFQECCQAEDKGACLLPKIETMREKVLASSARQRLRCASIQKFGERALKAWSVARLSQKFPKAEFVEVTKLVTDLTKVHKECCHGDLLECADDRADLAKYICDNQDTISSKLKECCDKPLLEKSHCIAEVEKDAIPENLPPLTADFAEDKDVCKNYQEAKDAFLGSFLYEYSRRHPEYAVSVLLRLAKEYEATLEECCAKDDPHACYSTVFDK…	2883	4914	1	1	1	473.903	1418.69	3	1418.69	-0.0003	0	58.52	0.00019	K	SLHTLFGDELCK	V
4	1::sp|cRAP087|P02769|ALBU_BOVIN	Serum albumin OS=Bos taurus GN=ALB PE=1 SV=4	2158	71244	70	70	40	40	68.2	607	MKWVTFISLLLLFSSAYSRGVFRRDTHKSEIAHRFKDLGEEHFKGLVLIAFSQYLQQCPFDEHVKLVNELTEFAKTCVADESHAGCEKSLHTLFGDELCKVASLRETYGDMADCCEKQEPERNECFLSHKDDSPDLPKLKPDPNTLCDEFKADEKKFWGKYLYEIARRHPYFYAPELLYYANKYNGVFQECCQAEDKGACLLPKIETMREKVLASSARQRLRCASIQKFGERALKAWSVARLSQKFPKAEFVEVTKLVTDLTKVHKECCHGDLLECADDRADLAKYICDNQDTISSKLKECCDKPLLEKSHCIAEVEKDAIPENLPPLTADFAEDKDVCKNYQEAKDAFLGSFLYEYSRRHPEYAVSVLLRLAKEYEATLEECCAKDDPHACYSTVFDK…	2884	5040	1	1	1	473.903	1418.69	3	1418.69	0	0	37.13	0.026	K	SLHTLFGDELCK	V
4	1::sp|cRAP087|P02769|ALBU_BOVIN	Serum albumin OS=Bos taurus GN=ALB PE=1 SV=4	2158	71244	70	70	40	40	68.2	607	MKWVTFISLLLLFSSAYSRGVFRRDTHKSEIAHRFKDLGEEHFKGLVLIAFSQYLQQCPFDEHVKLVNELTEFAKTCVADESHAGCEKSLHTLFGDELCKVASLRETYGDMADCCEKQEPERNECFLSHKDDSPDLPKLKPDPNTLCDEFKADEKKFWGKYLYEIARRHPYFYAPELLYYANKYNGVFQECCQAEDKGACLLPKIETMREKVLASSARQRLRCASIQKFGERALKAWSVARLSQKFPKAEFVEVTKLVTDLTKVHKECCHGDLLECADDRADLAKYICDNQDTISSKLKECCDKPLLEKSHCIAEVEKDAIPENLPPLTADFAEDKDVCKNYQEAKDAFLGSFLYEYSRRHPEYAVSVLLRLAKEYEATLEECCAKDDPHACYSTVFDK…	2997	5769	1	1	1	480.608	1438.8	3	1438.8	-0.0017	1	49.1	0.00061	R	RHPEYAVSVLLR	L
4	1::sp|cRAP087|P02769|ALBU_BOVIN	Serum albumin OS=Bos taurus GN=ALB PE=1 SV=4	2158	71244	70	70	40	40	68.2	607	MKWVTFISLLLLFSSAYSRGVFRRDTHKSEIAHRFKDLGEEHFKGLVLIAFSQYLQQCPFDEHVKLVNELTEFAKTCVADESHAGCEKSLHTLFGDELCKVASLRETYGDMADCCEKQEPERNECFLSHKDDSPDLPKLKPDPNTLCDEFKADEKKFWGKYLYEIARRHPYFYAPELLYYANKYNGVFQECCQAEDKGACLLPKIETMREKVLASSARQRLRCASIQKFGERALKAWSVARLSQKFPKAEFVEVTKLVTDLTKVHKECCHGDLLECADDRADLAKYICDNQDTISSKLKECCDKPLLEKSHCIAEVEKDAIPENLPPLTADFAEDKDVCKNYQEAKDAFLGSFLYEYSRRHPEYAVSVLLRLAKEYEATLEECCAKDDPHACYSTVFDK…	2998	6008	1	1	1	480.608	1438.8	3	1438.8	-0.0007	1	54.16	0.00019	R	RHPEYAVSVLLR	L
4	1::sp|cRAP087|P02769|ALBU_BOVIN	Serum albumin OS=Bos taurus GN=ALB PE=1 SV=4	2158	71244	70	70	40	40	68.2	607	MKWVTFISLLLLFSSAYSRGVFRRDTHKSEIAHRFKDLGEEHFKGLVLIAFSQYLQQCPFDEHVKLVNELTEFAKTCVADESHAGCEKSLHTLFGDELCKVASLRETYGDMADCCEKQEPERNECFLSHKDDSPDLPKLKPDPNTLCDEFKADEKKFWGKYLYEIARRHPYFYAPELLYYANKYNGVFQECCQAEDKGACLLPKIETMREKVLASSARQRLRCASIQKFGERALKAWSVARLSQKFPKAEFVEVTKLVTDLTKVHKECCHGDLLECADDRADLAKYICDNQDTISSKLKECCDKPLLEKSHCIAEVEKDAIPENLPPLTADFAEDKDVCKNYQEAKDAFLGSFLYEYSRRHPEYAVSVLLRLAKEYEATLEECCAKDDPHACYSTVFDK…	2999	6147	1	1	1	480.609	1438.81	3	1438.8	0.0016	1	49.28	0.00058	R	RHPEYAVSVLLR	L
4	1::sp|cRAP087|P02769|ALBU_BOVIN	Serum albumin OS=Bos taurus GN=ALB PE=1 SV=4	2158	71244	70	70	40	40	68.2	607	MKWVTFISLLLLFSSAYSRGVFRRDTHKSEIAHRFKDLGEEHFKGLVLIAFSQYLQQCPFDEHVKLVNELTEFAKTCVADESHAGCEKSLHTLFGDELCKVASLRETYGDMADCCEKQEPERNECFLSHKDDSPDLPKLKPDPNTLCDEFKADEKKFWGKYLYEIARRHPYFYAPELLYYANKYNGVFQECCQAEDKGACLLPKIETMREKVLASSARQRLRCASIQKFGERALKAWSVARLSQKFPKAEFVEVTKLVTDLTKVHKECCHGDLLECADDRADLAKYICDNQDTISSKLKECCDKPLLEKSHCIAEVEKDAIPENLPPLTADFAEDKDVCKNYQEAKDAFLGSFLYEYSRRHPEYAVSVLLRLAKEYEATLEECCAKDDPHACYSTVFDK…	3013	2218	2	1	1	722.324	1442.63	2	1442.63	-0.0012	0	30.74	0.047	K	YICDNQDTISSK	L
4	1::sp|cRAP087|P02769|ALBU_BOVIN	Serum albumin OS=Bos taurus GN=ALB PE=1 SV=4	2158	71244	70	70	40	40	68.2	607	MKWVTFISLLLLFSSAYSRGVFRRDTHKSEIAHRFKDLGEEHFKGLVLIAFSQYLQQCPFDEHVKLVNELTEFAKTCVADESHAGCEKSLHTLFGDELCKVASLRETYGDMADCCEKQEPERNECFLSHKDDSPDLPKLKPDPNTLCDEFKADEKKFWGKYLYEIARRHPYFYAPELLYYANKYNGVFQECCQAEDKGACLLPKIETMREKVLASSARQRLRCASIQKFGERALKAWSVARLSQKFPKAEFVEVTKLVTDLTKVHKECCHGDLLECADDRADLAKYICDNQDTISSKLKECCDKPLLEKSHCIAEVEKDAIPENLPPLTADFAEDKDVCKNYQEAKDAFLGSFLYEYSRRHPEYAVSVLLRLAKEYEATLEECCAKDDPHACYSTVFDK…	3014	2345	1	1	1	722.324	1442.63	2	1442.63	-0.0009	0	87.07	1.1e-07	K	YICDNQDTISSK	L
4	1::sp|cRAP087|P02769|ALBU_BOVIN	Serum albumin OS=Bos taurus GN=ALB PE=1 SV=4	2158	71244	70	70	40	40	68.2	607	MKWVTFISLLLLFSSAYSRGVFRRDTHKSEIAHRFKDLGEEHFKGLVLIAFSQYLQQCPFDEHVKLVNELTEFAKTCVADESHAGCEKSLHTLFGDELCKVASLRETYGDMADCCEKQEPERNECFLSHKDDSPDLPKLKPDPNTLCDEFKADEKKFWGKYLYEIARRHPYFYAPELLYYANKYNGVFQECCQAEDKGACLLPKIETMREKVLASSARQRLRCASIQKFGERALKAWSVARLSQKFPKAEFVEVTKLVTDLTKVHKECCHGDLLECADDRADLAKYICDNQDTISSKLKECCDKPLLEKSHCIAEVEKDAIPENLPPLTADFAEDKDVCKNYQEAKDAFLGSFLYEYSRRHPEYAVSVLLRLAKEYEATLEECCAKDDPHACYSTVFDK…	3094	899	1	1	1	488.534	1462.58	3	1462.58	-0.0005	0	43.2	0.00067	K	TCVADESHAGCEK	S
4	1::sp|cRAP087|P02769|ALBU_BOVIN	Serum albumin OS=Bos taurus GN=ALB PE=1 SV=4	2158	71244	70	70	40	40	68.2	607	MKWVTFISLLLLFSSAYSRGVFRRDTHKSEIAHRFKDLGEEHFKGLVLIAFSQYLQQCPFDEHVKLVNELTEFAKTCVADESHAGCEKSLHTLFGDELCKVASLRETYGDMADCCEKQEPERNECFLSHKDDSPDLPKLKPDPNTLCDEFKADEKKFWGKYLYEIARRHPYFYAPELLYYANKYNGVFQECCQAEDKGACLLPKIETMREKVLASSARQRLRCASIQKFGERALKAWSVARLSQKFPKAEFVEVTKLVTDLTKVHKECCHGDLLECADDRADLAKYICDNQDTISSKLKECCDKPLLEKSHCIAEVEKDAIPENLPPLTADFAEDKDVCKNYQEAKDAFLGSFLYEYSRRHPEYAVSVLLRLAKEYEATLEECCAKDDPHACYSTVFDK…	3096	1009	1	1	1	488.535	1462.58	3	1462.58	0.0003	0	50.67	0.00013	K	TCVADESHAGCEK	S
4	1::sp|cRAP087|P02769|ALBU_BOVIN	Serum albumin OS=Bos taurus GN=ALB PE=1 SV=4	2158	71244	70	70	40	40	68.2	607	MKWVTFISLLLLFSSAYSRGVFRRDTHKSEIAHRFKDLGEEHFKGLVLIAFSQYLQQCPFDEHVKLVNELTEFAKTCVADESHAGCEKSLHTLFGDELCKVASLRETYGDMADCCEKQEPERNECFLSHKDDSPDLPKLKPDPNTLCDEFKADEKKFWGKYLYEIARRHPYFYAPELLYYANKYNGVFQECCQAEDKGACLLPKIETMREKVLASSARQRLRCASIQKFGERALKAWSVARLSQKFPKAEFVEVTKLVTDLTKVHKECCHGDLLECADDRADLAKYICDNQDTISSKLKECCDKPLLEKSHCIAEVEKDAIPENLPPLTADFAEDKDVCKNYQEAKDAFLGSFLYEYSRRHPEYAVSVLLRLAKEYEATLEECCAKDDPHACYSTVFDK…	3097	903	1	1	1	732.298	1462.58	2	1462.58	0.0006	0	65.11	4.7e-06	K	TCVADESHAGCEK	S
4	1::sp|cRAP087|P02769|ALBU_BOVIN	Serum albumin OS=Bos taurus GN=ALB PE=1 SV=4	2158	71244	70	70	40	40	68.2	607	MKWVTFISLLLLFSSAYSRGVFRRDTHKSEIAHRFKDLGEEHFKGLVLIAFSQYLQQCPFDEHVKLVNELTEFAKTCVADESHAGCEKSLHTLFGDELCKVASLRETYGDMADCCEKQEPERNECFLSHKDDSPDLPKLKPDPNTLCDEFKADEKKFWGKYLYEIARRHPYFYAPELLYYANKYNGVFQECCQAEDKGACLLPKIETMREKVLASSARQRLRCASIQKFGERALKAWSVARLSQKFPKAEFVEVTKLVTDLTKVHKECCHGDLLECADDRADLAKYICDNQDTISSKLKECCDKPLLEKSHCIAEVEKDAIPENLPPLTADFAEDKDVCKNYQEAKDAFLGSFLYEYSRRHPEYAVSVLLRLAKEYEATLEECCAKDDPHACYSTVFDK…	3179	2466	1	1	1	739.763	1477.51	2	1477.52	-0.0037	0	59.92	1.1e-06	R	ETYGDMADCCEK	Q
4	1::sp|cRAP087|P02769|ALBU_BOVIN	Serum albumin OS=Bos taurus GN=ALB PE=1 SV=4	2158	71244	70	70	40	40	68.2	607	MKWVTFISLLLLFSSAYSRGVFRRDTHKSEIAHRFKDLGEEHFKGLVLIAFSQYLQQCPFDEHVKLVNELTEFAKTCVADESHAGCEKSLHTLFGDELCKVASLRETYGDMADCCEKQEPERNECFLSHKDDSPDLPKLKPDPNTLCDEFKADEKKFWGKYLYEIARRHPYFYAPELLYYANKYNGVFQECCQAEDKGACLLPKIETMREKVLASSARQRLRCASIQKFGERALKAWSVARLSQKFPKAEFVEVTKLVTDLTKVHKECCHGDLLECADDRADLAKYICDNQDTISSKLKECCDKPLLEKSHCIAEVEKDAIPENLPPLTADFAEDKDVCKNYQEAKDAFLGSFLYEYSRRHPEYAVSVLLRLAKEYEATLEECCAKDDPHACYSTVFDK…	3187	5994	1	1	1	740.401	1478.79	2	1478.79	-0.0009	0	99.13	1.2e-08	K	LGEYGFQNALIVR	Y
4	1::sp|cRAP087|P02769|ALBU_BOVIN	Serum albumin OS=Bos taurus GN=ALB PE=1 SV=4	2158	71244	70	70	40	40	68.2	607	MKWVTFISLLLLFSSAYSRGVFRRDTHKSEIAHRFKDLGEEHFKGLVLIAFSQYLQQCPFDEHVKLVNELTEFAKTCVADESHAGCEKSLHTLFGDELCKVASLRETYGDMADCCEKQEPERNECFLSHKDDSPDLPKLKPDPNTLCDEFKADEKKFWGKYLYEIARRHPYFYAPELLYYANKYNGVFQECCQAEDKGACLLPKIETMREKVLASSARQRLRCASIQKFGERALKAWSVARLSQKFPKAEFVEVTKLVTDLTKVHKECCHGDLLECADDRADLAKYICDNQDTISSKLKECCDKPLLEKSHCIAEVEKDAIPENLPPLTADFAEDKDVCKNYQEAKDAFLGSFLYEYSRRHPEYAVSVLLRLAKEYEATLEECCAKDDPHACYSTVFDK…	3192	6131	1	1	1	740.894	1479.77	2	1479.77	0.0019	0	77.34	1.8e-06	K	LGEYGFQNALIVR	Y
4	1::sp|cRAP087|P02769|ALBU_BOVIN	Serum albumin OS=Bos taurus GN=ALB PE=1 SV=4	2158	71244	70	70	40	40	68.2	607	MKWVTFISLLLLFSSAYSRGVFRRDTHKSEIAHRFKDLGEEHFKGLVLIAFSQYLQQCPFDEHVKLVNELTEFAKTCVADESHAGCEKSLHTLFGDELCKVASLRETYGDMADCCEKQEPERNECFLSHKDDSPDLPKLKPDPNTLCDEFKADEKKFWGKYLYEIARRHPYFYAPELLYYANKYNGVFQECCQAEDKGACLLPKIETMREKVLASSARQRLRCASIQKFGERALKAWSVARLSQKFPKAEFVEVTKLVTDLTKVHKECCHGDLLECADDRADLAKYICDNQDTISSKLKECCDKPLLEKSHCIAEVEKDAIPENLPPLTADFAEDKDVCKNYQEAKDAFLGSFLYEYSRRHPEYAVSVLLRLAKEYEATLEECCAKDDPHACYSTVFDK…	3273	1461	1	1	1	747.761	1493.51	2	1493.51	-0.0026	0	61.79	6.6e-07	R	ETYGDMADCCEK	Q
4	1::sp|cRAP087|P02769|ALBU_BOVIN	Serum albumin OS=Bos taurus GN=ALB PE=1 SV=4	2158	71244	70	70	40	40	68.2	607	MKWVTFISLLLLFSSAYSRGVFRRDTHKSEIAHRFKDLGEEHFKGLVLIAFSQYLQQCPFDEHVKLVNELTEFAKTCVADESHAGCEKSLHTLFGDELCKVASLRETYGDMADCCEKQEPERNECFLSHKDDSPDLPKLKPDPNTLCDEFKADEKKFWGKYLYEIARRHPYFYAPELLYYANKYNGVFQECCQAEDKGACLLPKIETMREKVLASSARQRLRCASIQKFGERALKAWSVARLSQKFPKAEFVEVTKLVTDLTKVHKECCHGDLLECADDRADLAKYICDNQDTISSKLKECCDKPLLEKSHCIAEVEKDAIPENLPPLTADFAEDKDVCKNYQEAKDAFLGSFLYEYSRRHPEYAVSVLLRLAKEYEATLEECCAKDDPHACYSTVFDK…	3336	3004	1	1	1	751.808	1501.6	2	1501.61	-0.0043	0	47.97	0.00025	K	EYEATLEECCAK	D
4	1::sp|cRAP087|P02769|ALBU_BOVIN	Serum albumin OS=Bos taurus GN=ALB PE=1 SV=4	2158	71244	70	70	40	40	68.2	607	MKWVTFISLLLLFSSAYSRGVFRRDTHKSEIAHRFKDLGEEHFKGLVLIAFSQYLQQCPFDEHVKLVNELTEFAKTCVADESHAGCEKSLHTLFGDELCKVASLRETYGDMADCCEKQEPERNECFLSHKDDSPDLPKLKPDPNTLCDEFKADEKKFWGKYLYEIARRHPYFYAPELLYYANKYNGVFQECCQAEDKGACLLPKIETMREKVLASSARQRLRCASIQKFGERALKAWSVARLSQKFPKAEFVEVTKLVTDLTKVHKECCHGDLLECADDRADLAKYICDNQDTISSKLKECCDKPLLEKSHCIAEVEKDAIPENLPPLTADFAEDKDVCKNYQEAKDAFLGSFLYEYSRRHPEYAVSVLLRLAKEYEATLEECCAKDDPHACYSTVFDK…	3338	2878	1	1	1	751.81	1501.61	2	1501.61	-0.0004	0	60.32	1.7e-05	K	EYEATLEECCAK	D
4	1::sp|cRAP087|P02769|ALBU_BOVIN	Serum albumin OS=Bos taurus GN=ALB PE=1 SV=4	2158	71244	70	70	40	40	68.2	607	MKWVTFISLLLLFSSAYSRGVFRRDTHKSEIAHRFKDLGEEHFKGLVLIAFSQYLQQCPFDEHVKLVNELTEFAKTCVADESHAGCEKSLHTLFGDELCKVASLRETYGDMADCCEKQEPERNECFLSHKDDSPDLPKLKPDPNTLCDEFKADEKKFWGKYLYEIARRHPYFYAPELLYYANKYNGVFQECCQAEDKGACLLPKIETMREKVLASSARQRLRCASIQKFGERALKAWSVARLSQKFPKAEFVEVTKLVTDLTKVHKECCHGDLLECADDRADLAKYICDNQDTISSKLKECCDKPLLEKSHCIAEVEKDAIPENLPPLTADFAEDKDVCKNYQEAKDAFLGSFLYEYSRRHPEYAVSVLLRLAKEYEATLEECCAKDDPHACYSTVFDK…	3378	4704	1	1	0	756.424	1510.83	2	1510.84	-0.0019	0	78.63	8.5e-07	K	VPQVSTPTLVEVSR	S
4	1::sp|cRAP087|P02769|ALBU_BOVIN	Serum albumin OS=Bos taurus GN=ALB PE=1 SV=4	2158	71244	70	70	40	40	68.2	607	MKWVTFISLLLLFSSAYSRGVFRRDTHKSEIAHRFKDLGEEHFKGLVLIAFSQYLQQCPFDEHVKLVNELTEFAKTCVADESHAGCEKSLHTLFGDELCKVASLRETYGDMADCCEKQEPERNECFLSHKDDSPDLPKLKPDPNTLCDEFKADEKKFWGKYLYEIARRHPYFYAPELLYYANKYNGVFQECCQAEDKGACLLPKIETMREKVLASSARQRLRCASIQKFGERALKAWSVARLSQKFPKAEFVEVTKLVTDLTKVHKECCHGDLLECADDRADLAKYICDNQDTISSKLKECCDKPLLEKSHCIAEVEKDAIPENLPPLTADFAEDKDVCKNYQEAKDAFLGSFLYEYSRRHPEYAVSVLLRLAKEYEATLEECCAKDDPHACYSTVFDK…	3513	2352	1	1	1	511.599	1531.77	3	1531.77	-0.0002	1	43.6	0.0067	K	LKECCDKPLLEK	S
4	1::sp|cRAP087|P02769|ALBU_BOVIN	Serum albumin OS=Bos taurus GN=ALB PE=1 SV=4	2158	71244	70	70	40	40	68.2	607	MKWVTFISLLLLFSSAYSRGVFRRDTHKSEIAHRFKDLGEEHFKGLVLIAFSQYLQQCPFDEHVKLVNELTEFAKTCVADESHAGCEKSLHTLFGDELCKVASLRETYGDMADCCEKQEPERNECFLSHKDDSPDLPKLKPDPNTLCDEFKADEKKFWGKYLYEIARRHPYFYAPELLYYANKYNGVFQECCQAEDKGACLLPKIETMREKVLASSARQRLRCASIQKFGERALKAWSVARLSQKFPKAEFVEVTKLVTDLTKVHKECCHGDLLECADDRADLAKYICDNQDTISSKLKECCDKPLLEKSHCIAEVEKDAIPENLPPLTADFAEDKDVCKNYQEAKDAFLGSFLYEYSRRHPEYAVSVLLRLAKEYEATLEECCAKDDPHACYSTVFDK…	3514	2453	1	1	1	511.599	1531.77	3	1531.77	0	1	39.68	0.016	K	LKECCDKPLLEK	S
4	1::sp|cRAP087|P02769|ALBU_BOVIN	Serum albumin OS=Bos taurus GN=ALB PE=1 SV=4	2158	71244	70	70	40	40	68.2	607	MKWVTFISLLLLFSSAYSRGVFRRDTHKSEIAHRFKDLGEEHFKGLVLIAFSQYLQQCPFDEHVKLVNELTEFAKTCVADESHAGCEKSLHTLFGDELCKVASLRETYGDMADCCEKQEPERNECFLSHKDDSPDLPKLKPDPNTLCDEFKADEKKFWGKYLYEIARRHPYFYAPELLYYANKYNGVFQECCQAEDKGACLLPKIETMREKVLASSARQRLRCASIQKFGERALKAWSVARLSQKFPKAEFVEVTKLVTDLTKVHKECCHGDLLECADDRADLAKYICDNQDTISSKLKECCDKPLLEKSHCIAEVEKDAIPENLPPLTADFAEDKDVCKNYQEAKDAFLGSFLYEYSRRHPEYAVSVLLRLAKEYEATLEECCAKDDPHACYSTVFDK…	3617	3547	1	1	1	777.83	1553.64	2	1553.65	-0.001	0	55.23	9.8e-05	K	DDPHACYSTVFDK	L
4	1::sp|cRAP087|P02769|ALBU_BOVIN	Serum albumin OS=Bos taurus GN=ALB PE=1 SV=4	2158	71244	70	70	40	40	68.2	607	MKWVTFISLLLLFSSAYSRGVFRRDTHKSEIAHRFKDLGEEHFKGLVLIAFSQYLQQCPFDEHVKLVNELTEFAKTCVADESHAGCEKSLHTLFGDELCKVASLRETYGDMADCCEKQEPERNECFLSHKDDSPDLPKLKPDPNTLCDEFKADEKKFWGKYLYEIARRHPYFYAPELLYYANKYNGVFQECCQAEDKGACLLPKIETMREKVLASSARQRLRCASIQKFGERALKAWSVARLSQKFPKAEFVEVTKLVTDLTKVHKECCHGDLLECADDRADLAKYICDNQDTISSKLKECCDKPLLEKSHCIAEVEKDAIPENLPPLTADFAEDKDVCKNYQEAKDAFLGSFLYEYSRRHPEYAVSVLLRLAKEYEATLEECCAKDDPHACYSTVFDK…	3714	3915	1	1	1	788.884	1575.75	2	1575.76	-0.0071	0	25.23	0.42	K	LKPDPNTLCDEFK	A
4	1::sp|cRAP087|P02769|ALBU_BOVIN	Serum albumin OS=Bos taurus GN=ALB PE=1 SV=4	2158	71244	70	70	40	40	68.2	607	MKWVTFISLLLLFSSAYSRGVFRRDTHKSEIAHRFKDLGEEHFKGLVLIAFSQYLQQCPFDEHVKLVNELTEFAKTCVADESHAGCEKSLHTLFGDELCKVASLRETYGDMADCCEKQEPERNECFLSHKDDSPDLPKLKPDPNTLCDEFKADEKKFWGKYLYEIARRHPYFYAPELLYYANKYNGVFQECCQAEDKGACLLPKIETMREKVLASSARQRLRCASIQKFGERALKAWSVARLSQKFPKAEFVEVTKLVTDLTKVHKECCHGDLLECADDRADLAKYICDNQDTISSKLKECCDKPLLEKSHCIAEVEKDAIPENLPPLTADFAEDKDVCKNYQEAKDAFLGSFLYEYSRRHPEYAVSVLLRLAKEYEATLEECCAKDDPHACYSTVFDK…	3715	4022	1	1	1	526.26	1575.76	3	1575.76	-0.003	0	37.48	0.026	K	LKPDPNTLCDEFK	A
4	1::sp|cRAP087|P02769|ALBU_BOVIN	Serum albumin OS=Bos taurus GN=ALB PE=1 SV=4	2158	71244	70	70	40	40	68.2	607	MKWVTFISLLLLFSSAYSRGVFRRDTHKSEIAHRFKDLGEEHFKGLVLIAFSQYLQQCPFDEHVKLVNELTEFAKTCVADESHAGCEKSLHTLFGDELCKVASLRETYGDMADCCEKQEPERNECFLSHKDDSPDLPKLKPDPNTLCDEFKADEKKFWGKYLYEIARRHPYFYAPELLYYANKYNGVFQECCQAEDKGACLLPKIETMREKVLASSARQRLRCASIQKFGERALKAWSVARLSQKFPKAEFVEVTKLVTDLTKVHKECCHGDLLECADDRADLAKYICDNQDTISSKLKECCDKPLLEKSHCIAEVEKDAIPENLPPLTADFAEDKDVCKNYQEAKDAFLGSFLYEYSRRHPEYAVSVLLRLAKEYEATLEECCAKDDPHACYSTVFDK…	3717	3893	1	1	1	526.26	1575.76	3	1575.76	-0.0014	0	51.28	0.0011	K	LKPDPNTLCDEFK	A
4	1::sp|cRAP087|P02769|ALBU_BOVIN	Serum albumin OS=Bos taurus GN=ALB PE=1 SV=4	2158	71244	70	70	40	40	68.2	607	MKWVTFISLLLLFSSAYSRGVFRRDTHKSEIAHRFKDLGEEHFKGLVLIAFSQYLQQCPFDEHVKLVNELTEFAKTCVADESHAGCEKSLHTLFGDELCKVASLRETYGDMADCCEKQEPERNECFLSHKDDSPDLPKLKPDPNTLCDEFKADEKKFWGKYLYEIARRHPYFYAPELLYYANKYNGVFQECCQAEDKGACLLPKIETMREKVLASSARQRLRCASIQKFGERALKAWSVARLSQKFPKAEFVEVTKLVTDLTKVHKECCHGDLLECADDRADLAKYICDNQDTISSKLKECCDKPLLEKSHCIAEVEKDAIPENLPPLTADFAEDKDVCKNYQEAKDAFLGSFLYEYSRRHPEYAVSVLLRLAKEYEATLEECCAKDDPHACYSTVFDK…	3985	3825	1	1	0	820.472	1638.93	2	1638.93	-0.0006	1	61.57	2.5e-05	R	KVPQVSTPTLVEVSR	S
4	1::sp|cRAP087|P02769|ALBU_BOVIN	Serum albumin OS=Bos taurus GN=ALB PE=1 SV=4	2158	71244	70	70	40	40	68.2	607	MKWVTFISLLLLFSSAYSRGVFRRDTHKSEIAHRFKDLGEEHFKGLVLIAFSQYLQQCPFDEHVKLVNELTEFAKTCVADESHAGCEKSLHTLFGDELCKVASLRETYGDMADCCEKQEPERNECFLSHKDDSPDLPKLKPDPNTLCDEFKADEKKFWGKYLYEIARRHPYFYAPELLYYANKYNGVFQECCQAEDKGACLLPKIETMREKVLASSARQRLRCASIQKFGERALKAWSVARLSQKFPKAEFVEVTKLVTDLTKVHKECCHGDLLECADDRADLAKYICDNQDTISSKLKECCDKPLLEKSHCIAEVEKDAIPENLPPLTADFAEDKDVCKNYQEAKDAFLGSFLYEYSRRHPEYAVSVLLRLAKEYEATLEECCAKDDPHACYSTVFDK…	3986	3817	1	1	0	547.317	1638.93	3	1638.93	-0.0002	1	89.08	4.4e-08	R	KVPQVSTPTLVEVSR	S
4	1::sp|cRAP087|P02769|ALBU_BOVIN	Serum albumin OS=Bos taurus GN=ALB PE=1 SV=4	2158	71244	70	70	40	40	68.2	607	MKWVTFISLLLLFSSAYSRGVFRRDTHKSEIAHRFKDLGEEHFKGLVLIAFSQYLQQCPFDEHVKLVNELTEFAKTCVADESHAGCEKSLHTLFGDELCKVASLRETYGDMADCCEKQEPERNECFLSHKDDSPDLPKLKPDPNTLCDEFKADEKKFWGKYLYEIARRHPYFYAPELLYYANKYNGVFQECCQAEDKGACLLPKIETMREKVLASSARQRLRCASIQKFGERALKAWSVARLSQKFPKAEFVEVTKLVTDLTKVHKECCHGDLLECADDRADLAKYICDNQDTISSKLKECCDKPLLEKSHCIAEVEKDAIPENLPPLTADFAEDKDVCKNYQEAKDAFLGSFLYEYSRRHPEYAVSVLLRLAKEYEATLEECCAKDDPHACYSTVFDK…	3987	3943	1	1	0	547.318	1638.93	3	1638.93	0.0008	1	59	4.2e-05	R	KVPQVSTPTLVEVSR	S
4	1::sp|cRAP087|P02769|ALBU_BOVIN	Serum albumin OS=Bos taurus GN=ALB PE=1 SV=4	2158	71244	70	70	40	40	68.2	607	MKWVTFISLLLLFSSAYSRGVFRRDTHKSEIAHRFKDLGEEHFKGLVLIAFSQYLQQCPFDEHVKLVNELTEFAKTCVADESHAGCEKSLHTLFGDELCKVASLRETYGDMADCCEKQEPERNECFLSHKDDSPDLPKLKPDPNTLCDEFKADEKKFWGKYLYEIARRHPYFYAPELLYYANKYNGVFQECCQAEDKGACLLPKIETMREKVLASSARQRLRCASIQKFGERALKAWSVARLSQKFPKAEFVEVTKLVTDLTKVHKECCHGDLLECADDRADLAKYICDNQDTISSKLKECCDKPLLEKSHCIAEVEKDAIPENLPPLTADFAEDKDVCKNYQEAKDAFLGSFLYEYSRRHPEYAVSVLLRLAKEYEATLEECCAKDDPHACYSTVFDK…	4404	7169	1	1	1	580.948	1739.82	3	1739.82	0.0009	0	52.56	0.00068	R	MPCTEDYLSLILNR	L
4	1::sp|cRAP087|P02769|ALBU_BOVIN	Serum albumin OS=Bos taurus GN=ALB PE=1 SV=4	2158	71244	70	70	40	40	68.2	607	MKWVTFISLLLLFSSAYSRGVFRRDTHKSEIAHRFKDLGEEHFKGLVLIAFSQYLQQCPFDEHVKLVNELTEFAKTCVADESHAGCEKSLHTLFGDELCKVASLRETYGDMADCCEKQEPERNECFLSHKDDSPDLPKLKPDPNTLCDEFKADEKKFWGKYLYEIARRHPYFYAPELLYYANKYNGVFQECCQAEDKGACLLPKIETMREKVLASSARQRLRCASIQKFGERALKAWSVARLSQKFPKAEFVEVTKLVTDLTKVHKECCHGDLLECADDRADLAKYICDNQDTISSKLKECCDKPLLEKSHCIAEVEKDAIPENLPPLTADFAEDKDVCKNYQEAKDAFLGSFLYEYSRRHPEYAVSVLLRLAKEYEATLEECCAKDDPHACYSTVFDK…	4435	3230	1	1	1	874.356	1746.7	2	1746.7	-0.0007	0	60.57	1.4e-05	K	YNGVFQECCQAEDK	G
4	1::sp|cRAP087|P02769|ALBU_BOVIN	Serum albumin OS=Bos taurus GN=ALB PE=1 SV=4	2158	71244	70	70	40	40	68.2	607	MKWVTFISLLLLFSSAYSRGVFRRDTHKSEIAHRFKDLGEEHFKGLVLIAFSQYLQQCPFDEHVKLVNELTEFAKTCVADESHAGCEKSLHTLFGDELCKVASLRETYGDMADCCEKQEPERNECFLSHKDDSPDLPKLKPDPNTLCDEFKADEKKFWGKYLYEIARRHPYFYAPELLYYANKYNGVFQECCQAEDKGACLLPKIETMREKVLASSARQRLRCASIQKFGERALKAWSVARLSQKFPKAEFVEVTKLVTDLTKVHKECCHGDLLECADDRADLAKYICDNQDTISSKLKECCDKPLLEKSHCIAEVEKDAIPENLPPLTADFAEDKDVCKNYQEAKDAFLGSFLYEYSRRHPEYAVSVLLRLAKEYEATLEECCAKDDPHACYSTVFDK…	4436	5420	1	1	1	874.358	1746.7	2	1746.7	0.0033	0	38.53	0.0025	K	YNGVFQECCQAEDK	G
4	1::sp|cRAP087|P02769|ALBU_BOVIN	Serum albumin OS=Bos taurus GN=ALB PE=1 SV=4	2158	71244	70	70	40	40	68.2	607	MKWVTFISLLLLFSSAYSRGVFRRDTHKSEIAHRFKDLGEEHFKGLVLIAFSQYLQQCPFDEHVKLVNELTEFAKTCVADESHAGCEKSLHTLFGDELCKVASLRETYGDMADCCEKQEPERNECFLSHKDDSPDLPKLKPDPNTLCDEFKADEKKFWGKYLYEIARRHPYFYAPELLYYANKYNGVFQECCQAEDKGACLLPKIETMREKVLASSARQRLRCASIQKFGERALKAWSVARLSQKFPKAEFVEVTKLVTDLTKVHKECCHGDLLECADDRADLAKYICDNQDTISSKLKECCDKPLLEKSHCIAEVEKDAIPENLPPLTADFAEDKDVCKNYQEAKDAFLGSFLYEYSRRHPEYAVSVLLRLAKEYEATLEECCAKDDPHACYSTVFDK…	4439	3623	1	1	1	874.845	1747.67	2	1747.68	-0.0068	0	47.33	0.00015	K	YNGVFQECCQAEDK	G
4	1::sp|cRAP087|P02769|ALBU_BOVIN	Serum albumin OS=Bos taurus GN=ALB PE=1 SV=4	2158	71244	70	70	40	40	68.2	607	MKWVTFISLLLLFSSAYSRGVFRRDTHKSEIAHRFKDLGEEHFKGLVLIAFSQYLQQCPFDEHVKLVNELTEFAKTCVADESHAGCEKSLHTLFGDELCKVASLRETYGDMADCCEKQEPERNECFLSHKDDSPDLPKLKPDPNTLCDEFKADEKKFWGKYLYEIARRHPYFYAPELLYYANKYNGVFQECCQAEDKGACLLPKIETMREKVLASSARQRLRCASIQKFGERALKAWSVARLSQKFPKAEFVEVTKLVTDLTKVHKECCHGDLLECADDRADLAKYICDNQDTISSKLKECCDKPLLEKSHCIAEVEKDAIPENLPPLTADFAEDKDVCKNYQEAKDAFLGSFLYEYSRRHPEYAVSVLLRLAKEYEATLEECCAKDDPHACYSTVFDK…	4440	3483	1	1	1	874.849	1747.68	2	1747.68	0.0009	0	62.64	5.3e-06	K	YNGVFQECCQAEDK	G
4	1::sp|cRAP087|P02769|ALBU_BOVIN	Serum albumin OS=Bos taurus GN=ALB PE=1 SV=4	2158	71244	70	70	40	40	68.2	607	MKWVTFISLLLLFSSAYSRGVFRRDTHKSEIAHRFKDLGEEHFKGLVLIAFSQYLQQCPFDEHVKLVNELTEFAKTCVADESHAGCEKSLHTLFGDELCKVASLRETYGDMADCCEKQEPERNECFLSHKDDSPDLPKLKPDPNTLCDEFKADEKKFWGKYLYEIARRHPYFYAPELLYYANKYNGVFQECCQAEDKGACLLPKIETMREKVLASSARQRLRCASIQKFGERALKAWSVARLSQKFPKAEFVEVTKLVTDLTKVHKECCHGDLLECADDRADLAKYICDNQDTISSKLKECCDKPLLEKSHCIAEVEKDAIPENLPPLTADFAEDKDVCKNYQEAKDAFLGSFLYEYSRRHPEYAVSVLLRLAKEYEATLEECCAKDDPHACYSTVFDK…	4445	2902	1	1	1	583.892	1748.65	3	1748.66	-0.0006	0	31.88	0.0026	K	ECCHGDLLECADDR	A
4	1::sp|cRAP087|P02769|ALBU_BOVIN	Serum albumin OS=Bos taurus GN=ALB PE=1 SV=4	2158	71244	70	70	40	40	68.2	607	MKWVTFISLLLLFSSAYSRGVFRRDTHKSEIAHRFKDLGEEHFKGLVLIAFSQYLQQCPFDEHVKLVNELTEFAKTCVADESHAGCEKSLHTLFGDELCKVASLRETYGDMADCCEKQEPERNECFLSHKDDSPDLPKLKPDPNTLCDEFKADEKKFWGKYLYEIARRHPYFYAPELLYYANKYNGVFQECCQAEDKGACLLPKIETMREKVLASSARQRLRCASIQKFGERALKAWSVARLSQKFPKAEFVEVTKLVTDLTKVHKECCHGDLLECADDRADLAKYICDNQDTISSKLKECCDKPLLEKSHCIAEVEKDAIPENLPPLTADFAEDKDVCKNYQEAKDAFLGSFLYEYSRRHPEYAVSVLLRLAKEYEATLEECCAKDDPHACYSTVFDK…	4446	2879	1	1	1	875.337	1748.66	2	1748.66	0.0042	0	43.72	0.00019	K	ECCHGDLLECADDR	A
4	1::sp|cRAP087|P02769|ALBU_BOVIN	Serum albumin OS=Bos taurus GN=ALB PE=1 SV=4	2158	71244	70	70	40	40	68.2	607	MKWVTFISLLLLFSSAYSRGVFRRDTHKSEIAHRFKDLGEEHFKGLVLIAFSQYLQQCPFDEHVKLVNELTEFAKTCVADESHAGCEKSLHTLFGDELCKVASLRETYGDMADCCEKQEPERNECFLSHKDDSPDLPKLKPDPNTLCDEFKADEKKFWGKYLYEIARRHPYFYAPELLYYANKYNGVFQECCQAEDKGACLLPKIETMREKVLASSARQRLRCASIQKFGERALKAWSVARLSQKFPKAEFVEVTKLVTDLTKVHKECCHGDLLECADDRADLAKYICDNQDTISSKLKECCDKPLLEKSHCIAEVEKDAIPENLPPLTADFAEDKDVCKNYQEAKDAFLGSFLYEYSRRHPEYAVSVLLRLAKEYEATLEECCAKDDPHACYSTVFDK…	4937	4405	1	1	1	627.644	1879.91	3	1879.91	-0.0024	0	33.99	0.061	R	RPCFSALTPDETYVPK	A
4	1::sp|cRAP087|P02769|ALBU_BOVIN	Serum albumin OS=Bos taurus GN=ALB PE=1 SV=4	2158	71244	70	70	40	40	68.2	607	MKWVTFISLLLLFSSAYSRGVFRRDTHKSEIAHRFKDLGEEHFKGLVLIAFSQYLQQCPFDEHVKLVNELTEFAKTCVADESHAGCEKSLHTLFGDELCKVASLRETYGDMADCCEKQEPERNECFLSHKDDSPDLPKLKPDPNTLCDEFKADEKKFWGKYLYEIARRHPYFYAPELLYYANKYNGVFQECCQAEDKGACLLPKIETMREKVLASSARQRLRCASIQKFGERALKAWSVARLSQKFPKAEFVEVTKLVTDLTKVHKECCHGDLLECADDRADLAKYICDNQDTISSKLKECCDKPLLEKSHCIAEVEKDAIPENLPPLTADFAEDKDVCKNYQEAKDAFLGSFLYEYSRRHPEYAVSVLLRLAKEYEATLEECCAKDDPHACYSTVFDK…	4938	4526	1	1	1	627.645	1879.91	3	1879.91	-0.0015	0	26.52	0.34	R	RPCFSALTPDETYVPK	A
4	1::sp|cRAP087|P02769|ALBU_BOVIN	Serum albumin OS=Bos taurus GN=ALB PE=1 SV=4	2158	71244	70	70	40	40	68.2	607	MKWVTFISLLLLFSSAYSRGVFRRDTHKSEIAHRFKDLGEEHFKGLVLIAFSQYLQQCPFDEHVKLVNELTEFAKTCVADESHAGCEKSLHTLFGDELCKVASLRETYGDMADCCEKQEPERNECFLSHKDDSPDLPKLKPDPNTLCDEFKADEKKFWGKYLYEIARRHPYFYAPELLYYANKYNGVFQECCQAEDKGACLLPKIETMREKVLASSARQRLRCASIQKFGERALKAWSVARLSQKFPKAEFVEVTKLVTDLTKVHKECCHGDLLECADDRADLAKYICDNQDTISSKLKECCDKPLLEKSHCIAEVEKDAIPENLPPLTADFAEDKDVCKNYQEAKDAFLGSFLYEYSRRHPEYAVSVLLRLAKEYEATLEECCAKDDPHACYSTVFDK…	4962	6265	1	1	1	630.314	1887.92	3	1887.92	0.0009	0	50.57	0.0013	R	HPYFYAPELLYYANK	Y
4	1::sp|cRAP087|P02769|ALBU_BOVIN	Serum albumin OS=Bos taurus GN=ALB PE=1 SV=4	2158	71244	70	70	40	40	68.2	607	MKWVTFISLLLLFSSAYSRGVFRRDTHKSEIAHRFKDLGEEHFKGLVLIAFSQYLQQCPFDEHVKLVNELTEFAKTCVADESHAGCEKSLHTLFGDELCKVASLRETYGDMADCCEKQEPERNECFLSHKDDSPDLPKLKPDPNTLCDEFKADEKKFWGKYLYEIARRHPYFYAPELLYYANKYNGVFQECCQAEDKGACLLPKIETMREKVLASSARQRLRCASIQKFGERALKAWSVARLSQKFPKAEFVEVTKLVTDLTKVHKECCHGDLLECADDRADLAKYICDNQDTISSKLKECCDKPLLEKSHCIAEVEKDAIPENLPPLTADFAEDKDVCKNYQEAKDAFLGSFLYEYSRRHPEYAVSVLLRLAKEYEATLEECCAKDDPHACYSTVFDK…	5025	3468	1	1	1	634.628	1900.86	3	1900.86	-0.0015	1	43.54	0.0044	R	NECFLSHKDDSPDLPK	L
4	1::sp|cRAP087|P02769|ALBU_BOVIN	Serum albumin OS=Bos taurus GN=ALB PE=1 SV=4	2158	71244	70	70	40	40	68.2	607	MKWVTFISLLLLFSSAYSRGVFRRDTHKSEIAHRFKDLGEEHFKGLVLIAFSQYLQQCPFDEHVKLVNELTEFAKTCVADESHAGCEKSLHTLFGDELCKVASLRETYGDMADCCEKQEPERNECFLSHKDDSPDLPKLKPDPNTLCDEFKADEKKFWGKYLYEIARRHPYFYAPELLYYANKYNGVFQECCQAEDKGACLLPKIETMREKVLASSARQRLRCASIQKFGERALKAWSVARLSQKFPKAEFVEVTKLVTDLTKVHKECCHGDLLECADDRADLAKYICDNQDTISSKLKECCDKPLLEKSHCIAEVEKDAIPENLPPLTADFAEDKDVCKNYQEAKDAFLGSFLYEYSRRHPEYAVSVLLRLAKEYEATLEECCAKDDPHACYSTVFDK…	5026	3465	1	1	1	476.223	1900.86	4	1900.86	0.0016	1	50.93	0.00083	R	NECFLSHKDDSPDLPK	L
4	1::sp|cRAP087|P02769|ALBU_BOVIN	Serum albumin OS=Bos taurus GN=ALB PE=1 SV=4	2158	71244	70	70	40	40	68.2	607	MKWVTFISLLLLFSSAYSRGVFRRDTHKSEIAHRFKDLGEEHFKGLVLIAFSQYLQQCPFDEHVKLVNELTEFAKTCVADESHAGCEKSLHTLFGDELCKVASLRETYGDMADCCEKQEPERNECFLSHKDDSPDLPKLKPDPNTLCDEFKADEKKFWGKYLYEIARRHPYFYAPELLYYANKYNGVFQECCQAEDKGACLLPKIETMREKVLASSARQRLRCASIQKFGERALKAWSVARLSQKFPKAEFVEVTKLVTDLTKVHKECCHGDLLECADDRADLAKYICDNQDTISSKLKECCDKPLLEKSHCIAEVEKDAIPENLPPLTADFAEDKDVCKNYQEAKDAFLGSFLYEYSRRHPEYAVSVLLRLAKEYEATLEECCAKDDPHACYSTVFDK…	5040	5503	1	1	1	636.645	1906.91	3	1906.91	-0.0012	0	69	1.9e-05	K	LFTFHADICTLPDTEK	Q
4	1::sp|cRAP087|P02769|ALBU_BOVIN	Serum albumin OS=Bos taurus GN=ALB PE=1 SV=4	2158	71244	70	70	40	40	68.2	607	MKWVTFISLLLLFSSAYSRGVFRRDTHKSEIAHRFKDLGEEHFKGLVLIAFSQYLQQCPFDEHVKLVNELTEFAKTCVADESHAGCEKSLHTLFGDELCKVASLRETYGDMADCCEKQEPERNECFLSHKDDSPDLPKLKPDPNTLCDEFKADEKKFWGKYLYEIARRHPYFYAPELLYYANKYNGVFQECCQAEDKGACLLPKIETMREKVLASSARQRLRCASIQKFGERALKAWSVARLSQKFPKAEFVEVTKLVTDLTKVHKECCHGDLLECADDRADLAKYICDNQDTISSKLKECCDKPLLEKSHCIAEVEKDAIPENLPPLTADFAEDKDVCKNYQEAKDAFLGSFLYEYSRRHPEYAVSVLLRLAKEYEATLEECCAKDDPHACYSTVFDK…	5041	5637	1	1	1	636.645	1906.91	3	1906.91	-0.0008	0	26.42	0.35	K	LFTFHADICTLPDTEK	Q
4	1::sp|cRAP087|P02769|ALBU_BOVIN	Serum albumin OS=Bos taurus GN=ALB PE=1 SV=4	2158	71244	70	70	40	40	68.2	607	MKWVTFISLLLLFSSAYSRGVFRRDTHKSEIAHRFKDLGEEHFKGLVLIAFSQYLQQCPFDEHVKLVNELTEFAKTCVADESHAGCEKSLHTLFGDELCKVASLRETYGDMADCCEKQEPERNECFLSHKDDSPDLPKLKPDPNTLCDEFKADEKKFWGKYLYEIARRHPYFYAPELLYYANKYNGVFQECCQAEDKGACLLPKIETMREKVLASSARQRLRCASIQKFGERALKAWSVARLSQKFPKAEFVEVTKLVTDLTKVHKECCHGDLLECADDRADLAKYICDNQDTISSKLKECCDKPLLEKSHCIAEVEKDAIPENLPPLTADFAEDKDVCKNYQEAKDAFLGSFLYEYSRRHPEYAVSVLLRLAKEYEATLEECCAKDDPHACYSTVFDK…	5104	2868	1	1	1	643.27	1926.79	3	1926.79	-0.0021	1	64.61	9.5e-06	K	CCAADDKEACFAVEGPK	L
4	1::sp|cRAP087|P02769|ALBU_BOVIN	Serum albumin OS=Bos taurus GN=ALB PE=1 SV=4	2158	71244	70	70	40	40	68.2	607	MKWVTFISLLLLFSSAYSRGVFRRDTHKSEIAHRFKDLGEEHFKGLVLIAFSQYLQQCPFDEHVKLVNELTEFAKTCVADESHAGCEKSLHTLFGDELCKVASLRETYGDMADCCEKQEPERNECFLSHKDDSPDLPKLKPDPNTLCDEFKADEKKFWGKYLYEIARRHPYFYAPELLYYANKYNGVFQECCQAEDKGACLLPKIETMREKVLASSARQRLRCASIQKFGERALKAWSVARLSQKFPKAEFVEVTKLVTDLTKVHKECCHGDLLECADDRADLAKYICDNQDTISSKLKECCDKPLLEKSHCIAEVEKDAIPENLPPLTADFAEDKDVCKNYQEAKDAFLGSFLYEYSRRHPEYAVSVLLRLAKEYEATLEECCAKDDPHACYSTVFDK…	5105	2890	1	1	1	964.403	1926.79	2	1926.79	-0.0004	1	109.59	3.2e-10	K	CCAADDKEACFAVEGPK	L
4	1::sp|cRAP087|P02769|ALBU_BOVIN	Serum albumin OS=Bos taurus GN=ALB PE=1 SV=4	2158	71244	70	70	40	40	68.2	607	MKWVTFISLLLLFSSAYSRGVFRRDTHKSEIAHRFKDLGEEHFKGLVLIAFSQYLQQCPFDEHVKLVNELTEFAKTCVADESHAGCEKSLHTLFGDELCKVASLRETYGDMADCCEKQEPERNECFLSHKDDSPDLPKLKPDPNTLCDEFKADEKKFWGKYLYEIARRHPYFYAPELLYYANKYNGVFQECCQAEDKGACLLPKIETMREKVLASSARQRLRCASIQKFGERALKAWSVARLSQKFPKAEFVEVTKLVTDLTKVHKECCHGDLLECADDRADLAKYICDNQDTISSKLKECCDKPLLEKSHCIAEVEKDAIPENLPPLTADFAEDKDVCKNYQEAKDAFLGSFLYEYSRRHPEYAVSVLLRLAKEYEATLEECCAKDDPHACYSTVFDK…	5355	3747	1	1	1	505.748	2018.96	4	2018.96	0.0019	1	34.46	0.058	K	LKPDPNTLCDEFKADEK	K
4	1::sp|cRAP087|P02769|ALBU_BOVIN	Serum albumin OS=Bos taurus GN=ALB PE=1 SV=4	2158	71244	70	70	40	40	68.2	607	MKWVTFISLLLLFSSAYSRGVFRRDTHKSEIAHRFKDLGEEHFKGLVLIAFSQYLQQCPFDEHVKLVNELTEFAKTCVADESHAGCEKSLHTLFGDELCKVASLRETYGDMADCCEKQEPERNECFLSHKDDSPDLPKLKPDPNTLCDEFKADEKKFWGKYLYEIARRHPYFYAPELLYYANKYNGVFQECCQAEDKGACLLPKIETMREKVLASSARQRLRCASIQKFGERALKAWSVARLSQKFPKAEFVEVTKLVTDLTKVHKECCHGDLLECADDRADLAKYICDNQDTISSKLKECCDKPLLEKSHCIAEVEKDAIPENLPPLTADFAEDKDVCKNYQEAKDAFLGSFLYEYSRRHPEYAVSVLLRLAKEYEATLEECCAKDDPHACYSTVFDK…	5946	3473	1	1	1	749.985	2246.93	3	2246.94	-0.0032	1	34.62	0.012	K	ECCHGDLLECADDRADLAK	Y
4	1::sp|cRAP087|P02769|ALBU_BOVIN	Serum albumin OS=Bos taurus GN=ALB PE=1 SV=4	2158	71244	70	70	40	40	68.2	607	MKWVTFISLLLLFSSAYSRGVFRRDTHKSEIAHRFKDLGEEHFKGLVLIAFSQYLQQCPFDEHVKLVNELTEFAKTCVADESHAGCEKSLHTLFGDELCKVASLRETYGDMADCCEKQEPERNECFLSHKDDSPDLPKLKPDPNTLCDEFKADEKKFWGKYLYEIARRHPYFYAPELLYYANKYNGVFQECCQAEDKGACLLPKIETMREKVLASSARQRLRCASIQKFGERALKAWSVARLSQKFPKAEFVEVTKLVTDLTKVHKECCHGDLLECADDRADLAKYICDNQDTISSKLKECCDKPLLEKSHCIAEVEKDAIPENLPPLTADFAEDKDVCKNYQEAKDAFLGSFLYEYSRRHPEYAVSVLLRLAKEYEATLEECCAKDDPHACYSTVFDK…	5947	3478	1	1	1	562.741	2246.94	4	2246.94	-0.0002	1	29.38	0.044	K	ECCHGDLLECADDRADLAK	Y
4	1::sp|cRAP087|P02769|ALBU_BOVIN	Serum albumin OS=Bos taurus GN=ALB PE=1 SV=4	2158	71244	70	70	40	40	68.2	607	MKWVTFISLLLLFSSAYSRGVFRRDTHKSEIAHRFKDLGEEHFKGLVLIAFSQYLQQCPFDEHVKLVNELTEFAKTCVADESHAGCEKSLHTLFGDELCKVASLRETYGDMADCCEKQEPERNECFLSHKDDSPDLPKLKPDPNTLCDEFKADEKKFWGKYLYEIARRHPYFYAPELLYYANKYNGVFQECCQAEDKGACLLPKIETMREKVLASSARQRLRCASIQKFGERALKAWSVARLSQKFPKAEFVEVTKLVTDLTKVHKECCHGDLLECADDRADLAKYICDNQDTISSKLKECCDKPLLEKSHCIAEVEKDAIPENLPPLTADFAEDKDVCKNYQEAKDAFLGSFLYEYSRRHPEYAVSVLLRLAKEYEATLEECCAKDDPHACYSTVFDK…	6606	5919	1	1	1	820.064	2457.17	3	2457.17	-0.0018	1	56.47	0.00037	K	DAIPENLPPLTADFAEDKDVCK	N
4	1::sp|cRAP087|P02769|ALBU_BOVIN	Serum albumin OS=Bos taurus GN=ALB PE=1 SV=4	2158	71244	70	70	40	40	68.2	607	MKWVTFISLLLLFSSAYSRGVFRRDTHKSEIAHRFKDLGEEHFKGLVLIAFSQYLQQCPFDEHVKLVNELTEFAKTCVADESHAGCEKSLHTLFGDELCKVASLRETYGDMADCCEKQEPERNECFLSHKDDSPDLPKLKPDPNTLCDEFKADEKKFWGKYLYEIARRHPYFYAPELLYYANKYNGVFQECCQAEDKGACLLPKIETMREKVLASSARQRLRCASIQKFGERALKAWSVARLSQKFPKAEFVEVTKLVTDLTKVHKECCHGDLLECADDRADLAKYICDNQDTISSKLKECCDKPLLEKSHCIAEVEKDAIPENLPPLTADFAEDKDVCKNYQEAKDAFLGSFLYEYSRRHPEYAVSVLLRLAKEYEATLEECCAKDDPHACYSTVFDK…	8303	5878	1	1	1	703.14	3510.66	5	3510.66	-0.0013	2	42.75	0.0091	K	SHCIAEVEKDAIPENLPPLTADFAEDKDVCK	N
4	1::sp|cRAP087|P02769|ALBU_BOVIN	Serum albumin OS=Bos taurus GN=ALB PE=1 SV=4	2158	71244	70	70	40	40	68.2	607	MKWVTFISLLLLFSSAYSRGVFRRDTHKSEIAHRFKDLGEEHFKGLVLIAFSQYLQQCPFDEHVKLVNELTEFAKTCVADESHAGCEKSLHTLFGDELCKVASLRETYGDMADCCEKQEPERNECFLSHKDDSPDLPKLKPDPNTLCDEFKADEKKFWGKYLYEIARRHPYFYAPELLYYANKYNGVFQECCQAEDKGACLLPKIETMREKVLASSARQRLRCASIQKFGERALKAWSVARLSQKFPKAEFVEVTKLVTDLTKVHKECCHGDLLECADDRADLAKYICDNQDTISSKLKECCDKPLLEKSHCIAEVEKDAIPENLPPLTADFAEDKDVCKNYQEAKDAFLGSFLYEYSRRHPEYAVSVLLRLAKEYEATLEECCAKDDPHACYSTVFDK…	8305	5884	1	1	1	878.92	3511.65	4	3511.65	0.0032	2	34.19	0.064	K	SHCIAEVEKDAIPENLPPLTADFAEDKDVCK	N
5	1::sp|cRAP041|P35527|K1C9_HUMAN	Keratin, type I cytoskeletal 9 OS=Homo sapiens GN=KRT9 PE=1 SV=3	2080	62255	63	63	31	31	52.8	623	MSCRQFSSSYLSRSGGGGGGGLGSGGSIRSSYSRFSSSGGGGGGGRFSSSSGYGGGSSRVCGRGGGGSFGYSYGGGSGGGFSASSLGGGFGGGSRGFGGASGGGYSSSGGFGGGFGGGSGGGFGGGYGSGFGGFGGFGGGAGGGDGGILTANEKSTMQELNSRLASYLDKVQALEEANNDLENKIQDWYDKKGPAAIQKNYSPYYNTIDDLKDQIVDLTVGNNKTLLDIDNTRMTLDDFRIKFEMEQNLRQGVDADINGLRQVLDNLTMEKSDLEMQYETLQEELMALKKNHKEEMSQLTGQNSGDVNVEINVAPGKDLTKTLNDMRQEYEQLIAKNRKDIENQYETQITQIEHEVSSSGQEVQSSAKEVTQLRHGVQELEIELQSQLSKKAALEKSLE…	116	496	1	1	1	399.18	796.346	2	796.346	-0.0009	0	56.73	1.7e-05	R	GGSGGSYGR	G
5	1::sp|cRAP041|P35527|K1C9_HUMAN	Keratin, type I cytoskeletal 9 OS=Homo sapiens GN=KRT9 PE=1 SV=3	2080	62255	63	63	31	31	52.8	623	MSCRQFSSSYLSRSGGGGGGGLGSGGSIRSSYSRFSSSGGGGGGGRFSSSSGYGGGSSRVCGRGGGGSFGYSYGGGSGGGFSASSLGGGFGGGSRGFGGASGGGYSSSGGFGGGFGGGSGGGFGGGYGSGFGGFGGFGGGAGGGDGGILTANEKSTMQELNSRLASYLDKVQALEEANNDLENKIQDWYDKKGPAAIQKNYSPYYNTIDDLKDQIVDLTVGNNKTLLDIDNTRMTLDDFRIKFEMEQNLRQGVDADINGLRQVLDNLTMEKSDLEMQYETLQEELMALKKNHKEEMSQLTGQNSGDVNVEINVAPGKDLTKTLNDMRQEYEQLIAKNRKDIENQYETQITQIEHEVSSSGQEVQSSAKEVTQLRHGVQELEIELQSQLSKKAALEKSLE…	166	2713	1	1	0	405.224	808.433	2	808.433	-0.0005	0	39.49	0.0018	R	LASYLDK	V
5	1::sp|cRAP041|P35527|K1C9_HUMAN	Keratin, type I cytoskeletal 9 OS=Homo sapiens GN=KRT9 PE=1 SV=3	2080	62255	63	63	31	31	52.8	623	MSCRQFSSSYLSRSGGGGGGGLGSGGSIRSSYSRFSSSGGGGGGGRFSSSSGYGGGSSRVCGRGGGGSFGYSYGGGSGGGFSASSLGGGFGGGSRGFGGASGGGYSSSGGFGGGFGGGSGGGFGGGYGSGFGGFGGFGGGAGGGDGGILTANEKSTMQELNSRLASYLDKVQALEEANNDLENKIQDWYDKKGPAAIQKNYSPYYNTIDDLKDQIVDLTVGNNKTLLDIDNTRMTLDDFRIKFEMEQNLRQGVDADINGLRQVLDNLTMEKSDLEMQYETLQEELMALKKNHKEEMSQLTGQNSGDVNVEINVAPGKDLTKTLNDMRQEYEQLIAKNRKDIENQYETQITQIEHEVSSSGQEVQSSAKEVTQLRHGVQELEIELQSQLSKKAALEKSLE…	167	2822	1	1	0	405.225	808.435	2	808.433	0.0017	0	30.98	0.013	R	LASYLDK	V
5	1::sp|cRAP041|P35527|K1C9_HUMAN	Keratin, type I cytoskeletal 9 OS=Homo sapiens GN=KRT9 PE=1 SV=3	2080	62255	63	63	31	31	52.8	623	MSCRQFSSSYLSRSGGGGGGGLGSGGSIRSSYSRFSSSGGGGGGGRFSSSSGYGGGSSRVCGRGGGGSFGYSYGGGSGGGFSASSLGGGFGGGSRGFGGASGGGYSSSGGFGGGFGGGSGGGFGGGYGSGFGGFGGFGGGAGGGDGGILTANEKSTMQELNSRLASYLDKVQALEEANNDLENKIQDWYDKKGPAAIQKNYSPYYNTIDDLKDQIVDLTVGNNKTLLDIDNTRMTLDDFRIKFEMEQNLRQGVDADINGLRQVLDNLTMEKSDLEMQYETLQEELMALKKNHKEEMSQLTGQNSGDVNVEINVAPGKDLTKTLNDMRQEYEQLIAKNRKDIENQYETQITQIEHEVSSSGQEVQSSAKEVTQLRHGVQELEIELQSQLSKKAALEKSLE…	174	659	1	1	1	406.753	811.491	2	811.492	-0.0004	1	62.55	8.8e-06	K	KGPAAIQK	N
5	1::sp|cRAP041|P35527|K1C9_HUMAN	Keratin, type I cytoskeletal 9 OS=Homo sapiens GN=KRT9 PE=1 SV=3	2080	62255	63	63	31	31	52.8	623	MSCRQFSSSYLSRSGGGGGGGLGSGGSIRSSYSRFSSSGGGGGGGRFSSSSGYGGGSSRVCGRGGGGSFGYSYGGGSGGGFSASSLGGGFGGGSRGFGGASGGGYSSSGGFGGGFGGGSGGGFGGGYGSGFGGFGGFGGGAGGGDGGILTANEKSTMQELNSRLASYLDKVQALEEANNDLENKIQDWYDKKGPAAIQKNYSPYYNTIDDLKDQIVDLTVGNNKTLLDIDNTRMTLDDFRIKFEMEQNLRQGVDADINGLRQVLDNLTMEKSDLEMQYETLQEELMALKKNHKEEMSQLTGQNSGDVNVEINVAPGKDLTKTLNDMRQEYEQLIAKNRKDIENQYETQITQIEHEVSSSGQEVQSSAKEVTQLRHGVQELEIELQSQLSKKAALEKSLE…	482	4640	1	1	1	449.21	896.406	2	896.406	-0.0005	0	41.31	0.0021	R	MTLDDFR	I
5	1::sp|cRAP041|P35527|K1C9_HUMAN	Keratin, type I cytoskeletal 9 OS=Homo sapiens GN=KRT9 PE=1 SV=3	2080	62255	63	63	31	31	52.8	623	MSCRQFSSSYLSRSGGGGGGGLGSGGSIRSSYSRFSSSGGGGGGGRFSSSSGYGGGSSRVCGRGGGGSFGYSYGGGSGGGFSASSLGGGFGGGSRGFGGASGGGYSSSGGFGGGFGGGSGGGFGGGYGSGFGGFGGFGGGAGGGDGGILTANEKSTMQELNSRLASYLDKVQALEEANNDLENKIQDWYDKKGPAAIQKNYSPYYNTIDDLKDQIVDLTVGNNKTLLDIDNTRMTLDDFRIKFEMEQNLRQGVDADINGLRQVLDNLTMEKSDLEMQYETLQEELMALKKNHKEEMSQLTGQNSGDVNVEINVAPGKDLTKTLNDMRQEYEQLIAKNRKDIENQYETQITQIEHEVSSSGQEVQSSAKEVTQLRHGVQELEIELQSQLSKKAALEKSLE…	538	4672	1	1	1	457.207	912.399	2	912.401	-0.0018	0	47.39	0.00045	R	MTLDDFR	I
5	1::sp|cRAP041|P35527|K1C9_HUMAN	Keratin, type I cytoskeletal 9 OS=Homo sapiens GN=KRT9 PE=1 SV=3	2080	62255	63	63	31	31	52.8	623	MSCRQFSSSYLSRSGGGGGGGLGSGGSIRSSYSRFSSSGGGGGGGRFSSSSGYGGGSSRVCGRGGGGSFGYSYGGGSGGGFSASSLGGGFGGGSRGFGGASGGGYSSSGGFGGGFGGGSGGGFGGGYGSGFGGFGGFGGGAGGGDGGILTANEKSTMQELNSRLASYLDKVQALEEANNDLENKIQDWYDKKGPAAIQKNYSPYYNTIDDLKDQIVDLTVGNNKTLLDIDNTRMTLDDFRIKFEMEQNLRQGVDADINGLRQVLDNLTMEKSDLEMQYETLQEELMALKKNHKEEMSQLTGQNSGDVNVEINVAPGKDLTKTLNDMRQEYEQLIAKNRKDIENQYETQITQIEHEVSSSGQEVQSSAKEVTQLRHGVQELEIELQSQLSKKAALEKSLE…	539	3323	1	1	1	457.207	912.4	2	912.401	-0.0006	0	39.55	0.0027	R	MTLDDFR	I
5	1::sp|cRAP041|P35527|K1C9_HUMAN	Keratin, type I cytoskeletal 9 OS=Homo sapiens GN=KRT9 PE=1 SV=3	2080	62255	63	63	31	31	52.8	623	MSCRQFSSSYLSRSGGGGGGGLGSGGSIRSSYSRFSSSGGGGGGGRFSSSSGYGGGSSRVCGRGGGGSFGYSYGGGSGGGFSASSLGGGFGGGSRGFGGASGGGYSSSGGFGGGFGGGSGGGFGGGYGSGFGGFGGFGGGAGGGDGGILTANEKSTMQELNSRLASYLDKVQALEEANNDLENKIQDWYDKKGPAAIQKNYSPYYNTIDDLKDQIVDLTVGNNKTLLDIDNTRMTLDDFRIKFEMEQNLRQGVDADINGLRQVLDNLTMEKSDLEMQYETLQEELMALKKNHKEEMSQLTGQNSGDVNVEINVAPGKDLTKTLNDMRQEYEQLIAKNRKDIENQYETQITQIEHEVSSSGQEVQSSAKEVTQLRHGVQELEIELQSQLSKKAALEKSLE…	540	3415	1	1	1	457.208	912.401	2	912.401	0.0001	0	44.1	0.00095	R	MTLDDFR	I
5	1::sp|cRAP041|P35527|K1C9_HUMAN	Keratin, type I cytoskeletal 9 OS=Homo sapiens GN=KRT9 PE=1 SV=3	2080	62255	63	63	31	31	52.8	623	MSCRQFSSSYLSRSGGGGGGGLGSGGSIRSSYSRFSSSGGGGGGGRFSSSSGYGGGSSRVCGRGGGGSFGYSYGGGSGGGFSASSLGGGFGGGSRGFGGASGGGYSSSGGFGGGFGGGSGGGFGGGYGSGFGGFGGFGGGAGGGDGGILTANEKSTMQELNSRLASYLDKVQALEEANNDLENKIQDWYDKKGPAAIQKNYSPYYNTIDDLKDQIVDLTVGNNKTLLDIDNTRMTLDDFRIKFEMEQNLRQGVDADINGLRQVLDNLTMEKSDLEMQYETLQEELMALKKNHKEEMSQLTGQNSGDVNVEINVAPGKDLTKTLNDMRQEYEQLIAKNRKDIENQYETQITQIEHEVSSSGQEVQSSAKEVTQLRHGVQELEIELQSQLSKKAALEKSLE…	769	3406	1	1	1	484.23	966.446	2	966.445	0.0009	0	47.66	0.0011	K	IQDWYDK	K
5	1::sp|cRAP041|P35527|K1C9_HUMAN	Keratin, type I cytoskeletal 9 OS=Homo sapiens GN=KRT9 PE=1 SV=3	2080	62255	63	63	31	31	52.8	623	MSCRQFSSSYLSRSGGGGGGGLGSGGSIRSSYSRFSSSGGGGGGGRFSSSSGYGGGSSRVCGRGGGGSFGYSYGGGSGGGFSASSLGGGFGGGSRGFGGASGGGYSSSGGFGGGFGGGSGGGFGGGYGSGFGGFGGFGGGAGGGDGGILTANEKSTMQELNSRLASYLDKVQALEEANNDLENKIQDWYDKKGPAAIQKNYSPYYNTIDDLKDQIVDLTVGNNKTLLDIDNTRMTLDDFRIKFEMEQNLRQGVDADINGLRQVLDNLTMEKSDLEMQYETLQEELMALKKNHKEEMSQLTGQNSGDVNVEINVAPGKDLTKTLNDMRQEYEQLIAKNRKDIENQYETQITQIEHEVSSSGQEVQSSAKEVTQLRHGVQELEIELQSQLSKKAALEKSLE…	840	639	1	1	1	491.72	981.426	2	981.427	-0.0006	0	69.05	6e-06	R	FSSSGGGGGGGR	F
5	1::sp|cRAP041|P35527|K1C9_HUMAN	Keratin, type I cytoskeletal 9 OS=Homo sapiens GN=KRT9 PE=1 SV=3	2080	62255	63	63	31	31	52.8	623	MSCRQFSSSYLSRSGGGGGGGLGSGGSIRSSYSRFSSSGGGGGGGRFSSSSGYGGGSSRVCGRGGGGSFGYSYGGGSGGGFSASSLGGGFGGGSRGFGGASGGGYSSSGGFGGGFGGGSGGGFGGGYGSGFGGFGGFGGGAGGGDGGILTANEKSTMQELNSRLASYLDKVQALEEANNDLENKIQDWYDKKGPAAIQKNYSPYYNTIDDLKDQIVDLTVGNNKTLLDIDNTRMTLDDFRIKFEMEQNLRQGVDADINGLRQVLDNLTMEKSDLEMQYETLQEELMALKKNHKEEMSQLTGQNSGDVNVEINVAPGKDLTKTLNDMRQEYEQLIAKNRKDIENQYETQITQIEHEVSSSGQEVQSSAKEVTQLRHGVQELEIELQSQLSKKAALEKSLE…	841	740	1	1	1	491.72	981.426	2	981.427	-0.0003	0	66.37	1.1e-05	R	FSSSGGGGGGGR	F
5	1::sp|cRAP041|P35527|K1C9_HUMAN	Keratin, type I cytoskeletal 9 OS=Homo sapiens GN=KRT9 PE=1 SV=3	2080	62255	63	63	31	31	52.8	623	MSCRQFSSSYLSRSGGGGGGGLGSGGSIRSSYSRFSSSGGGGGGGRFSSSSGYGGGSSRVCGRGGGGSFGYSYGGGSGGGFSASSLGGGFGGGSRGFGGASGGGYSSSGGFGGGFGGGSGGGFGGGYGSGFGGFGGFGGGAGGGDGGILTANEKSTMQELNSRLASYLDKVQALEEANNDLENKIQDWYDKKGPAAIQKNYSPYYNTIDDLKDQIVDLTVGNNKTLLDIDNTRMTLDDFRIKFEMEQNLRQGVDADINGLRQVLDNLTMEKSDLEMQYETLQEELMALKKNHKEEMSQLTGQNSGDVNVEINVAPGKDLTKTLNDMRQEYEQLIAKNRKDIENQYETQITQIEHEVSSSGQEVQSSAKEVTQLRHGVQELEIELQSQLSKKAALEKSLE…	1179	4569	1	1	1	530.785	1059.56	2	1059.56	-0.0006	0	46.62	0.0032	K	TLLDIDNTR	M
5	1::sp|cRAP041|P35527|K1C9_HUMAN	Keratin, type I cytoskeletal 9 OS=Homo sapiens GN=KRT9 PE=1 SV=3	2080	62255	63	63	31	31	52.8	623	MSCRQFSSSYLSRSGGGGGGGLGSGGSIRSSYSRFSSSGGGGGGGRFSSSSGYGGGSSRVCGRGGGGSFGYSYGGGSGGGFSASSLGGGFGGGSRGFGGASGGGYSSSGGFGGGFGGGSGGGFGGGYGSGFGGFGGFGGGAGGGDGGILTANEKSTMQELNSRLASYLDKVQALEEANNDLENKIQDWYDKKGPAAIQKNYSPYYNTIDDLKDQIVDLTVGNNKTLLDIDNTRMTLDDFRIKFEMEQNLRQGVDADINGLRQVLDNLTMEKSDLEMQYETLQEELMALKKNHKEEMSQLTGQNSGDVNVEINVAPGKDLTKTLNDMRQEYEQLIAKNRKDIENQYETQITQIEHEVSSSGQEVQSSAKEVTQLRHGVQELEIELQSQLSKKAALEKSLE…	1180	4431	1	1	1	530.785	1059.56	2	1059.56	0.0002	0	65.67	3.8e-05	K	TLLDIDNTR	M
5	1::sp|cRAP041|P35527|K1C9_HUMAN	Keratin, type I cytoskeletal 9 OS=Homo sapiens GN=KRT9 PE=1 SV=3	2080	62255	63	63	31	31	52.8	623	MSCRQFSSSYLSRSGGGGGGGLGSGGSIRSSYSRFSSSGGGGGGGRFSSSSGYGGGSSRVCGRGGGGSFGYSYGGGSGGGFSASSLGGGFGGGSRGFGGASGGGYSSSGGFGGGFGGGSGGGFGGGYGSGFGGFGGFGGGAGGGDGGILTANEKSTMQELNSRLASYLDKVQALEEANNDLENKIQDWYDKKGPAAIQKNYSPYYNTIDDLKDQIVDLTVGNNKTLLDIDNTRMTLDDFRIKFEMEQNLRQGVDADINGLRQVLDNLTMEKSDLEMQYETLQEELMALKKNHKEEMSQLTGQNSGDVNVEINVAPGKDLTKTLNDMRQEYEQLIAKNRKDIENQYETQITQIEHEVSSSGQEVQSSAKEVTQLRHGVQELEIELQSQLSKKAALEKSLE…	1184	4807	1	1	1	531.278	1060.54	2	1060.54	0.0003	0	64.9	4.4e-05	K	TLLDIDNTR	M
5	1::sp|cRAP041|P35527|K1C9_HUMAN	Keratin, type I cytoskeletal 9 OS=Homo sapiens GN=KRT9 PE=1 SV=3	2080	62255	63	63	31	31	52.8	623	MSCRQFSSSYLSRSGGGGGGGLGSGGSIRSSYSRFSSSGGGGGGGRFSSSSGYGGGSSRVCGRGGGGSFGYSYGGGSGGGFSASSLGGGFGGGSRGFGGASGGGYSSSGGFGGGFGGGSGGGFGGGYGSGFGGFGGFGGGAGGGDGGILTANEKSTMQELNSRLASYLDKVQALEEANNDLENKIQDWYDKKGPAAIQKNYSPYYNTIDDLKDQIVDLTVGNNKTLLDIDNTRMTLDDFRIKFEMEQNLRQGVDADINGLRQVLDNLTMEKSDLEMQYETLQEELMALKKNHKEEMSQLTGQNSGDVNVEINVAPGKDLTKTLNDMRQEYEQLIAKNRKDIENQYETQITQIEHEVSSSGQEVQSSAKEVTQLRHGVQELEIELQSQLSKKAALEKSLE…	1199	1959	1	1	1	533.253	1064.49	2	1064.49	0.0003	0	47.02	0.0018	K	STMQELNSR	L
5	1::sp|cRAP041|P35527|K1C9_HUMAN	Keratin, type I cytoskeletal 9 OS=Homo sapiens GN=KRT9 PE=1 SV=3	2080	62255	63	63	31	31	52.8	623	MSCRQFSSSYLSRSGGGGGGGLGSGGSIRSSYSRFSSSGGGGGGGRFSSSSGYGGGSSRVCGRGGGGSFGYSYGGGSGGGFSASSLGGGFGGGSRGFGGASGGGYSSSGGFGGGFGGGSGGGFGGGYGSGFGGFGGFGGGAGGGDGGILTANEKSTMQELNSRLASYLDKVQALEEANNDLENKIQDWYDKKGPAAIQKNYSPYYNTIDDLKDQIVDLTVGNNKTLLDIDNTRMTLDDFRIKFEMEQNLRQGVDADINGLRQVLDNLTMEKSDLEMQYETLQEELMALKKNHKEEMSQLTGQNSGDVNVEINVAPGKDLTKTLNDMRQEYEQLIAKNRKDIENQYETQITQIEHEVSSSGQEVQSSAKEVTQLRHGVQELEIELQSQLSKKAALEKSLE…	1203	3433	1	1	1	533.753	1065.49	2	1065.49	0	0	33.78	0.039	K	FEMEQNLR	Q
5	1::sp|cRAP041|P35527|K1C9_HUMAN	Keratin, type I cytoskeletal 9 OS=Homo sapiens GN=KRT9 PE=1 SV=3	2080	62255	63	63	31	31	52.8	623	MSCRQFSSSYLSRSGGGGGGGLGSGGSIRSSYSRFSSSGGGGGGGRFSSSSGYGGGSSRVCGRGGGGSFGYSYGGGSGGGFSASSLGGGFGGGSRGFGGASGGGYSSSGGFGGGFGGGSGGGFGGGYGSGFGGFGGFGGGAGGGDGGILTANEKSTMQELNSRLASYLDKVQALEEANNDLENKIQDWYDKKGPAAIQKNYSPYYNTIDDLKDQIVDLTVGNNKTLLDIDNTRMTLDDFRIKFEMEQNLRQGVDADINGLRQVLDNLTMEKSDLEMQYETLQEELMALKKNHKEEMSQLTGQNSGDVNVEINVAPGKDLTKTLNDMRQEYEQLIAKNRKDIENQYETQITQIEHEVSSSGQEVQSSAKEVTQLRHGVQELEIELQSQLSKKAALEKSLE…	1248	1330	1	1	1	541.245	1080.48	2	1080.49	-0.011	0	33.82	0.024	K	STMQELNSR	L
5	1::sp|cRAP041|P35527|K1C9_HUMAN	Keratin, type I cytoskeletal 9 OS=Homo sapiens GN=KRT9 PE=1 SV=3	2080	62255	63	63	31	31	52.8	623	MSCRQFSSSYLSRSGGGGGGGLGSGGSIRSSYSRFSSSGGGGGGGRFSSSSGYGGGSSRVCGRGGGGSFGYSYGGGSGGGFSASSLGGGFGGGSRGFGGASGGGYSSSGGFGGGFGGGSGGGFGGGYGSGFGGFGGFGGGAGGGDGGILTANEKSTMQELNSRLASYLDKVQALEEANNDLENKIQDWYDKKGPAAIQKNYSPYYNTIDDLKDQIVDLTVGNNKTLLDIDNTRMTLDDFRIKFEMEQNLRQGVDADINGLRQVLDNLTMEKSDLEMQYETLQEELMALKKNHKEEMSQLTGQNSGDVNVEINVAPGKDLTKTLNDMRQEYEQLIAKNRKDIENQYETQITQIEHEVSSSGQEVQSSAKEVTQLRHGVQELEIELQSQLSKKAALEKSLE…	1249	1211	1	1	1	541.249	1080.48	2	1080.49	-0.0046	0	48.22	0.00092	K	STMQELNSR	L
5	1::sp|cRAP041|P35527|K1C9_HUMAN	Keratin, type I cytoskeletal 9 OS=Homo sapiens GN=KRT9 PE=1 SV=3	2080	62255	63	63	31	31	52.8	623	MSCRQFSSSYLSRSGGGGGGGLGSGGSIRSSYSRFSSSGGGGGGGRFSSSSGYGGGSSRVCGRGGGGSFGYSYGGGSGGGFSASSLGGGFGGGSRGFGGASGGGYSSSGGFGGGFGGGSGGGFGGGYGSGFGGFGGFGGGAGGGDGGILTANEKSTMQELNSRLASYLDKVQALEEANNDLENKIQDWYDKKGPAAIQKNYSPYYNTIDDLKDQIVDLTVGNNKTLLDIDNTRMTLDDFRIKFEMEQNLRQGVDADINGLRQVLDNLTMEKSDLEMQYETLQEELMALKKNHKEEMSQLTGQNSGDVNVEINVAPGKDLTKTLNDMRQEYEQLIAKNRKDIENQYETQITQIEHEVSSSGQEVQSSAKEVTQLRHGVQELEIELQSQLSKKAALEKSLE…	1250	1968	1	1	1	541.25	1080.49	2	1080.49	-0.0009	0	46.08	0.0016	K	STMQELNSR	L
5	1::sp|cRAP041|P35527|K1C9_HUMAN	Keratin, type I cytoskeletal 9 OS=Homo sapiens GN=KRT9 PE=1 SV=3	2080	62255	63	63	31	31	52.8	623	MSCRQFSSSYLSRSGGGGGGGLGSGGSIRSSYSRFSSSGGGGGGGRFSSSSGYGGGSSRVCGRGGGGSFGYSYGGGSGGGFSASSLGGGFGGGSRGFGGASGGGYSSSGGFGGGFGGGSGGGFGGGYGSGFGGFGGFGGGAGGGDGGILTANEKSTMQELNSRLASYLDKVQALEEANNDLENKIQDWYDKKGPAAIQKNYSPYYNTIDDLKDQIVDLTVGNNKTLLDIDNTRMTLDDFRIKFEMEQNLRQGVDADINGLRQVLDNLTMEKSDLEMQYETLQEELMALKKNHKEEMSQLTGQNSGDVNVEINVAPGKDLTKTLNDMRQEYEQLIAKNRKDIENQYETQITQIEHEVSSSGQEVQSSAKEVTQLRHGVQELEIELQSQLSKKAALEKSLE…	1251	1105	1	1	1	541.25	1080.49	2	1080.49	-0.0005	0	46.69	0.0014	K	STMQELNSR	L
5	1::sp|cRAP041|P35527|K1C9_HUMAN	Keratin, type I cytoskeletal 9 OS=Homo sapiens GN=KRT9 PE=1 SV=3	2080	62255	63	63	31	31	52.8	623	MSCRQFSSSYLSRSGGGGGGGLGSGGSIRSSYSRFSSSGGGGGGGRFSSSSGYGGGSSRVCGRGGGGSFGYSYGGGSGGGFSASSLGGGFGGGSRGFGGASGGGYSSSGGFGGGFGGGSGGGFGGGYGSGFGGFGGFGGGAGGGDGGILTANEKSTMQELNSRLASYLDKVQALEEANNDLENKIQDWYDKKGPAAIQKNYSPYYNTIDDLKDQIVDLTVGNNKTLLDIDNTRMTLDDFRIKFEMEQNLRQGVDADINGLRQVLDNLTMEKSDLEMQYETLQEELMALKKNHKEEMSQLTGQNSGDVNVEINVAPGKDLTKTLNDMRQEYEQLIAKNRKDIENQYETQITQIEHEVSSSGQEVQSSAKEVTQLRHGVQELEIELQSQLSKKAALEKSLE…	1252	1032	1	1	1	541.251	1080.49	2	1080.49	0	0	40.62	0.0056	K	STMQELNSR	L
5	1::sp|cRAP041|P35527|K1C9_HUMAN	Keratin, type I cytoskeletal 9 OS=Homo sapiens GN=KRT9 PE=1 SV=3	2080	62255	63	63	31	31	52.8	623	MSCRQFSSSYLSRSGGGGGGGLGSGGSIRSSYSRFSSSGGGGGGGRFSSSSGYGGGSSRVCGRGGGGSFGYSYGGGSGGGFSASSLGGGFGGGSRGFGGASGGGYSSSGGFGGGFGGGSGGGFGGGYGSGFGGFGGFGGGAGGGDGGILTANEKSTMQELNSRLASYLDKVQALEEANNDLENKIQDWYDKKGPAAIQKNYSPYYNTIDDLKDQIVDLTVGNNKTLLDIDNTRMTLDDFRIKFEMEQNLRQGVDADINGLRQVLDNLTMEKSDLEMQYETLQEELMALKKNHKEEMSQLTGQNSGDVNVEINVAPGKDLTKTLNDMRQEYEQLIAKNRKDIENQYETQITQIEHEVSSSGQEVQSSAKEVTQLRHGVQELEIELQSQLSKKAALEKSLE…	1255	2094	1	1	1	541.75	1081.49	2	1081.49	-0.0008	0	46.27	0.0014	K	FEMEQNLR	Q
5	1::sp|cRAP041|P35527|K1C9_HUMAN	Keratin, type I cytoskeletal 9 OS=Homo sapiens GN=KRT9 PE=1 SV=3	2080	62255	63	63	31	31	52.8	623	MSCRQFSSSYLSRSGGGGGGGLGSGGSIRSSYSRFSSSGGGGGGGRFSSSSGYGGGSSRVCGRGGGGSFGYSYGGGSGGGFSASSLGGGFGGGSRGFGGASGGGYSSSGGFGGGFGGGSGGGFGGGYGSGFGGFGGFGGGAGGGDGGILTANEKSTMQELNSRLASYLDKVQALEEANNDLENKIQDWYDKKGPAAIQKNYSPYYNTIDDLKDQIVDLTVGNNKTLLDIDNTRMTLDDFRIKFEMEQNLRQGVDADINGLRQVLDNLTMEKSDLEMQYETLQEELMALKKNHKEEMSQLTGQNSGDVNVEINVAPGKDLTKTLNDMRQEYEQLIAKNRKDIENQYETQITQIEHEVSSSGQEVQSSAKEVTQLRHGVQELEIELQSQLSKKAALEKSLE…	1321	2471	1	1	1	548.277	1094.54	2	1094.54	-0.0005	1	51.98	0.00062	K	IQDWYDKK	G
5	1::sp|cRAP041|P35527|K1C9_HUMAN	Keratin, type I cytoskeletal 9 OS=Homo sapiens GN=KRT9 PE=1 SV=3	2080	62255	63	63	31	31	52.8	623	MSCRQFSSSYLSRSGGGGGGGLGSGGSIRSSYSRFSSSGGGGGGGRFSSSSGYGGGSSRVCGRGGGGSFGYSYGGGSGGGFSASSLGGGFGGGSRGFGGASGGGYSSSGGFGGGFGGGSGGGFGGGYGSGFGGFGGFGGGAGGGDGGILTANEKSTMQELNSRLASYLDKVQALEEANNDLENKIQDWYDKKGPAAIQKNYSPYYNTIDDLKDQIVDLTVGNNKTLLDIDNTRMTLDDFRIKFEMEQNLRQGVDADINGLRQVLDNLTMEKSDLEMQYETLQEELMALKKNHKEEMSQLTGQNSGDVNVEINVAPGKDLTKTLNDMRQEYEQLIAKNRKDIENQYETQITQIEHEVSSSGQEVQSSAKEVTQLRHGVQELEIELQSQLSKKAALEKSLE…	1613	3327	1	1	1	579.298	1156.58	2	1156.58	-0.0027	0	45.5	0.0021	R	QGVDADINGLR	Q
5	1::sp|cRAP041|P35527|K1C9_HUMAN	Keratin, type I cytoskeletal 9 OS=Homo sapiens GN=KRT9 PE=1 SV=3	2080	62255	63	63	31	31	52.8	623	MSCRQFSSSYLSRSGGGGGGGLGSGGSIRSSYSRFSSSGGGGGGGRFSSSSGYGGGSSRVCGRGGGGSFGYSYGGGSGGGFSASSLGGGFGGGSRGFGGASGGGYSSSGGFGGGFGGGSGGGFGGGYGSGFGGFGGFGGGAGGGDGGILTANEKSTMQELNSRLASYLDKVQALEEANNDLENKIQDWYDKKGPAAIQKNYSPYYNTIDDLKDQIVDLTVGNNKTLLDIDNTRMTLDDFRIKFEMEQNLRQGVDADINGLRQVLDNLTMEKSDLEMQYETLQEELMALKKNHKEEMSQLTGQNSGDVNVEINVAPGKDLTKTLNDMRQEYEQLIAKNRKDIENQYETQITQIEHEVSSSGQEVQSSAKEVTQLRHGVQELEIELQSQLSKKAALEKSLE…	1614	3567	1	1	1	579.299	1156.58	2	1156.58	-0.0004	0	79.77	7.5e-07	R	QGVDADINGLR	Q
5	1::sp|cRAP041|P35527|K1C9_HUMAN	Keratin, type I cytoskeletal 9 OS=Homo sapiens GN=KRT9 PE=1 SV=3	2080	62255	63	63	31	31	52.8	623	MSCRQFSSSYLSRSGGGGGGGLGSGGSIRSSYSRFSSSGGGGGGGRFSSSSGYGGGSSRVCGRGGGGSFGYSYGGGSGGGFSASSLGGGFGGGSRGFGGASGGGYSSSGGFGGGFGGGSGGGFGGGYGSGFGGFGGFGGGAGGGDGGILTANEKSTMQELNSRLASYLDKVQALEEANNDLENKIQDWYDKKGPAAIQKNYSPYYNTIDDLKDQIVDLTVGNNKTLLDIDNTRMTLDDFRIKFEMEQNLRQGVDADINGLRQVLDNLTMEKSDLEMQYETLQEELMALKKNHKEEMSQLTGQNSGDVNVEINVAPGKDLTKTLNDMRQEYEQLIAKNRKDIENQYETQITQIEHEVSSSGQEVQSSAKEVTQLRHGVQELEIELQSQLSKKAALEKSLE…	1618	3924	1	1	1	579.791	1157.57	2	1157.57	-0.0005	0	82.07	4.8e-07	R	QGVDADINGLR	Q
5	1::sp|cRAP041|P35527|K1C9_HUMAN	Keratin, type I cytoskeletal 9 OS=Homo sapiens GN=KRT9 PE=1 SV=3	2080	62255	63	63	31	31	52.8	623	MSCRQFSSSYLSRSGGGGGGGLGSGGSIRSSYSRFSSSGGGGGGGRFSSSSGYGGGSSRVCGRGGGGSFGYSYGGGSGGGFSASSLGGGFGGGSRGFGGASGGGYSSSGGFGGGFGGGSGGGFGGGYGSGFGGFGGFGGGAGGGDGGILTANEKSTMQELNSRLASYLDKVQALEEANNDLENKIQDWYDKKGPAAIQKNYSPYYNTIDDLKDQIVDLTVGNNKTLLDIDNTRMTLDDFRIKFEMEQNLRQGVDADINGLRQVLDNLTMEKSDLEMQYETLQEELMALKKNHKEEMSQLTGQNSGDVNVEINVAPGKDLTKTLNDMRQEYEQLIAKNRKDIENQYETQITQIEHEVSSSGQEVQSSAKEVTQLRHGVQELEIELQSQLSKKAALEKSLE…	1619	3446	1	1	1	579.791	1157.57	2	1157.57	-0.0002	0	75.27	2.3e-06	R	QGVDADINGLR	Q
5	1::sp|cRAP041|P35527|K1C9_HUMAN	Keratin, type I cytoskeletal 9 OS=Homo sapiens GN=KRT9 PE=1 SV=3	2080	62255	63	63	31	31	52.8	623	MSCRQFSSSYLSRSGGGGGGGLGSGGSIRSSYSRFSSSGGGGGGGRFSSSSGYGGGSSRVCGRGGGGSFGYSYGGGSGGGFSASSLGGGFGGGSRGFGGASGGGYSSSGGFGGGFGGGSGGGFGGGYGSGFGGFGGFGGGAGGGDGGILTANEKSTMQELNSRLASYLDKVQALEEANNDLENKIQDWYDKKGPAAIQKNYSPYYNTIDDLKDQIVDLTVGNNKTLLDIDNTRMTLDDFRIKFEMEQNLRQGVDADINGLRQVLDNLTMEKSDLEMQYETLQEELMALKKNHKEEMSQLTGQNSGDVNVEINVAPGKDLTKTLNDMRQEYEQLIAKNRKDIENQYETQITQIEHEVSSSGQEVQSSAKEVTQLRHGVQELEIELQSQLSKKAALEKSLE…	1746	4124	1	1	1	595.808	1189.6	2	1189.6	-0.0006	0	63.03	6.4e-05	R	QVLDNLTMEK	S
5	1::sp|cRAP041|P35527|K1C9_HUMAN	Keratin, type I cytoskeletal 9 OS=Homo sapiens GN=KRT9 PE=1 SV=3	2080	62255	63	63	31	31	52.8	623	MSCRQFSSSYLSRSGGGGGGGLGSGGSIRSSYSRFSSSGGGGGGGRFSSSSGYGGGSSRVCGRGGGGSFGYSYGGGSGGGFSASSLGGGFGGGSRGFGGASGGGYSSSGGFGGGFGGGSGGGFGGGYGSGFGGFGGFGGGAGGGDGGILTANEKSTMQELNSRLASYLDKVQALEEANNDLENKIQDWYDKKGPAAIQKNYSPYYNTIDDLKDQIVDLTVGNNKTLLDIDNTRMTLDDFRIKFEMEQNLRQGVDADINGLRQVLDNLTMEKSDLEMQYETLQEELMALKKNHKEEMSQLTGQNSGDVNVEINVAPGKDLTKTLNDMRQEYEQLIAKNRKDIENQYETQITQIEHEVSSSGQEVQSSAKEVTQLRHGVQELEIELQSQLSKKAALEKSLE…	1818	3431	1	1	1	603.805	1205.6	2	1205.6	0.0001	0	59.56	0.00014	R	QVLDNLTMEK	S
5	1::sp|cRAP041|P35527|K1C9_HUMAN	Keratin, type I cytoskeletal 9 OS=Homo sapiens GN=KRT9 PE=1 SV=3	2080	62255	63	63	31	31	52.8	623	MSCRQFSSSYLSRSGGGGGGGLGSGGSIRSSYSRFSSSGGGGGGGRFSSSSGYGGGSSRVCGRGGGGSFGYSYGGGSGGGFSASSLGGGFGGGSRGFGGASGGGYSSSGGFGGGFGGGSGGGFGGGYGSGFGGFGGFGGGAGGGDGGILTANEKSTMQELNSRLASYLDKVQALEEANNDLENKIQDWYDKKGPAAIQKNYSPYYNTIDDLKDQIVDLTVGNNKTLLDIDNTRMTLDDFRIKFEMEQNLRQGVDADINGLRQVLDNLTMEKSDLEMQYETLQEELMALKKNHKEEMSQLTGQNSGDVNVEINVAPGKDLTKTLNDMRQEYEQLIAKNRKDIENQYETQITQIEHEVSSSGQEVQSSAKEVTQLRHGVQELEIELQSQLSKKAALEKSLE…	1933	2125	1	1	1	616.802	1231.59	2	1231.59	-0.0006	0	111.4	8.8e-10	R	SGGGGGGGLGSGGSIR	S
5	1::sp|cRAP041|P35527|K1C9_HUMAN	Keratin, type I cytoskeletal 9 OS=Homo sapiens GN=KRT9 PE=1 SV=3	2080	62255	63	63	31	31	52.8	623	MSCRQFSSSYLSRSGGGGGGGLGSGGSIRSSYSRFSSSGGGGGGGRFSSSSGYGGGSSRVCGRGGGGSFGYSYGGGSGGGFSASSLGGGFGGGSRGFGGASGGGYSSSGGFGGGFGGGSGGGFGGGYGSGFGGFGGFGGGAGGGDGGILTANEKSTMQELNSRLASYLDKVQALEEANNDLENKIQDWYDKKGPAAIQKNYSPYYNTIDDLKDQIVDLTVGNNKTLLDIDNTRMTLDDFRIKFEMEQNLRQGVDADINGLRQVLDNLTMEKSDLEMQYETLQEELMALKKNHKEEMSQLTGQNSGDVNVEINVAPGKDLTKTLNDMRQEYEQLIAKNRKDIENQYETQITQIEHEVSSSGQEVQSSAKEVTQLRHGVQELEIELQSQLSKKAALEKSLE…	1949	1695	1	1	1	618.266	1234.52	2	1234.52	-0.0033	0	31.2	0.025	R	FSSSSGYGGGSSR	V
5	1::sp|cRAP041|P35527|K1C9_HUMAN	Keratin, type I cytoskeletal 9 OS=Homo sapiens GN=KRT9 PE=1 SV=3	2080	62255	63	63	31	31	52.8	623	MSCRQFSSSYLSRSGGGGGGGLGSGGSIRSSYSRFSSSGGGGGGGRFSSSSGYGGGSSRVCGRGGGGSFGYSYGGGSGGGFSASSLGGGFGGGSRGFGGASGGGYSSSGGFGGGFGGGSGGGFGGGYGSGFGGFGGFGGGAGGGDGGILTANEKSTMQELNSRLASYLDKVQALEEANNDLENKIQDWYDKKGPAAIQKNYSPYYNTIDDLKDQIVDLTVGNNKTLLDIDNTRMTLDDFRIKFEMEQNLRQGVDADINGLRQVLDNLTMEKSDLEMQYETLQEELMALKKNHKEEMSQLTGQNSGDVNVEINVAPGKDLTKTLNDMRQEYEQLIAKNRKDIENQYETQITQIEHEVSSSGQEVQSSAKEVTQLRHGVQELEIELQSQLSKKAALEKSLE…	1950	1575	1	1	1	618.268	1234.52	2	1234.52	-0.001	0	74.9	1.1e-06	R	FSSSSGYGGGSSR	V
5	1::sp|cRAP041|P35527|K1C9_HUMAN	Keratin, type I cytoskeletal 9 OS=Homo sapiens GN=KRT9 PE=1 SV=3	2080	62255	63	63	31	31	52.8	623	MSCRQFSSSYLSRSGGGGGGGLGSGGSIRSSYSRFSSSGGGGGGGRFSSSSGYGGGSSRVCGRGGGGSFGYSYGGGSGGGFSASSLGGGFGGGSRGFGGASGGGYSSSGGFGGGFGGGSGGGFGGGYGSGFGGFGGFGGGAGGGDGGILTANEKSTMQELNSRLASYLDKVQALEEANNDLENKIQDWYDKKGPAAIQKNYSPYYNTIDDLKDQIVDLTVGNNKTLLDIDNTRMTLDDFRIKFEMEQNLRQGVDADINGLRQVLDNLTMEKSDLEMQYETLQEELMALKKNHKEEMSQLTGQNSGDVNVEINVAPGKDLTKTLNDMRQEYEQLIAKNRKDIENQYETQITQIEHEVSSSGQEVQSSAKEVTQLRHGVQELEIELQSQLSKKAALEKSLE…	2359	2732	1	1	1	662.339	1322.66	2	1322.67	-0.0019	1	54.73	0.00036	R	IKFEMEQNLR	Q
5	1::sp|cRAP041|P35527|K1C9_HUMAN	Keratin, type I cytoskeletal 9 OS=Homo sapiens GN=KRT9 PE=1 SV=3	2080	62255	63	63	31	31	52.8	623	MSCRQFSSSYLSRSGGGGGGGLGSGGSIRSSYSRFSSSGGGGGGGRFSSSSGYGGGSSRVCGRGGGGSFGYSYGGGSGGGFSASSLGGGFGGGSRGFGGASGGGYSSSGGFGGGFGGGSGGGFGGGYGSGFGGFGGFGGGAGGGDGGILTANEKSTMQELNSRLASYLDKVQALEEANNDLENKIQDWYDKKGPAAIQKNYSPYYNTIDDLKDQIVDLTVGNNKTLLDIDNTRMTLDDFRIKFEMEQNLRQGVDADINGLRQVLDNLTMEKSDLEMQYETLQEELMALKKNHKEEMSQLTGQNSGDVNVEINVAPGKDLTKTLNDMRQEYEQLIAKNRKDIENQYETQITQIEHEVSSSGQEVQSSAKEVTQLRHGVQELEIELQSQLSKKAALEKSLE…	2360	2714	1	1	1	441.895	1322.66	3	1322.67	-0.0009	1	56.94	0.00022	R	IKFEMEQNLR	Q
5	1::sp|cRAP041|P35527|K1C9_HUMAN	Keratin, type I cytoskeletal 9 OS=Homo sapiens GN=KRT9 PE=1 SV=3	2080	62255	63	63	31	31	52.8	623	MSCRQFSSSYLSRSGGGGGGGLGSGGSIRSSYSRFSSSGGGGGGGRFSSSSGYGGGSSRVCGRGGGGSFGYSYGGGSGGGFSASSLGGGFGGGSRGFGGASGGGYSSSGGFGGGFGGGSGGGFGGGYGSGFGGFGGFGGGAGGGDGGILTANEKSTMQELNSRLASYLDKVQALEEANNDLENKIQDWYDKKGPAAIQKNYSPYYNTIDDLKDQIVDLTVGNNKTLLDIDNTRMTLDDFRIKFEMEQNLRQGVDADINGLRQVLDNLTMEKSDLEMQYETLQEELMALKKNHKEEMSQLTGQNSGDVNVEINVAPGKDLTKTLNDMRQEYEQLIAKNRKDIENQYETQITQIEHEVSSSGQEVQSSAKEVTQLRHGVQELEIELQSQLSKKAALEKSLE…	3748	3220	1	1	1	793.887	1585.76	2	1585.76	0.0003	0	96.45	2.5e-08	K	VQALEEANNDLENK	I
5	1::sp|cRAP041|P35527|K1C9_HUMAN	Keratin, type I cytoskeletal 9 OS=Homo sapiens GN=KRT9 PE=1 SV=3	2080	62255	63	63	31	31	52.8	623	MSCRQFSSSYLSRSGGGGGGGLGSGGSIRSSYSRFSSSGGGGGGGRFSSSSGYGGGSSRVCGRGGGGSFGYSYGGGSGGGFSASSLGGGFGGGSRGFGGASGGGYSSSGGFGGGFGGGSGGGFGGGYGSGFGGFGGFGGGAGGGDGGILTANEKSTMQELNSRLASYLDKVQALEEANNDLENKIQDWYDKKGPAAIQKNYSPYYNTIDDLKDQIVDLTVGNNKTLLDIDNTRMTLDDFRIKFEMEQNLRQGVDADINGLRQVLDNLTMEKSDLEMQYETLQEELMALKKNHKEEMSQLTGQNSGDVNVEINVAPGKDLTKTLNDMRQEYEQLIAKNRKDIENQYETQITQIEHEVSSSGQEVQSSAKEVTQLRHGVQELEIELQSQLSKKAALEKSLE…	3749	3224	1	1	1	529.593	1585.76	3	1585.76	0.0004	0	56.71	0.00024	K	VQALEEANNDLENK	I
5	1::sp|cRAP041|P35527|K1C9_HUMAN	Keratin, type I cytoskeletal 9 OS=Homo sapiens GN=KRT9 PE=1 SV=3	2080	62255	63	63	31	31	52.8	623	MSCRQFSSSYLSRSGGGGGGGLGSGGSIRSSYSRFSSSGGGGGGGRFSSSSGYGGGSSRVCGRGGGGSFGYSYGGGSGGGFSASSLGGGFGGGSRGFGGASGGGYSSSGGFGGGFGGGSGGGFGGGYGSGFGGFGGFGGGAGGGDGGILTANEKSTMQELNSRLASYLDKVQALEEANNDLENKIQDWYDKKGPAAIQKNYSPYYNTIDDLKDQIVDLTVGNNKTLLDIDNTRMTLDDFRIKFEMEQNLRQGVDADINGLRQVLDNLTMEKSDLEMQYETLQEELMALKKNHKEEMSQLTGQNSGDVNVEINVAPGKDLTKTLNDMRQEYEQLIAKNRKDIENQYETQITQIEHEVSSSGQEVQSSAKEVTQLRHGVQELEIELQSQLSKKAALEKSLE…	3758	3070	1	1	1	794.379	1586.74	2	1586.74	0.0002	0	97.86	1.7e-08	K	VQALEEANNDLENK	I
5	1::sp|cRAP041|P35527|K1C9_HUMAN	Keratin, type I cytoskeletal 9 OS=Homo sapiens GN=KRT9 PE=1 SV=3	2080	62255	63	63	31	31	52.8	623	MSCRQFSSSYLSRSGGGGGGGLGSGGSIRSSYSRFSSSGGGGGGGRFSSSSGYGGGSSRVCGRGGGGSFGYSYGGGSGGGFSASSLGGGFGGGSRGFGGASGGGYSSSGGFGGGFGGGSGGGFGGGYGSGFGGFGGFGGGAGGGDGGILTANEKSTMQELNSRLASYLDKVQALEEANNDLENKIQDWYDKKGPAAIQKNYSPYYNTIDDLKDQIVDLTVGNNKTLLDIDNTRMTLDDFRIKFEMEQNLRQGVDADINGLRQVLDNLTMEKSDLEMQYETLQEELMALKKNHKEEMSQLTGQNSGDVNVEINVAPGKDLTKTLNDMRQEYEQLIAKNRKDIENQYETQITQIEHEVSSSGQEVQSSAKEVTQLRHGVQELEIELQSQLSKKAALEKSLE…	4622	1816	1	1	1	896.367	1790.72	2	1790.72	-0.0001	0	151.82	9.2e-15	R	GGSGGSYGGGGSGGGYGGGSGSR	G
5	1::sp|cRAP041|P35527|K1C9_HUMAN	Keratin, type I cytoskeletal 9 OS=Homo sapiens GN=KRT9 PE=1 SV=3	2080	62255	63	63	31	31	52.8	623	MSCRQFSSSYLSRSGGGGGGGLGSGGSIRSSYSRFSSSGGGGGGGRFSSSSGYGGGSSRVCGRGGGGSFGYSYGGGSGGGFSASSLGGGFGGGSRGFGGASGGGYSSSGGFGGGFGGGSGGGFGGGYGSGFGGFGGFGGGAGGGDGGILTANEKSTMQELNSRLASYLDKVQALEEANNDLENKIQDWYDKKGPAAIQKNYSPYYNTIDDLKDQIVDLTVGNNKTLLDIDNTRMTLDDFRIKFEMEQNLRQGVDADINGLRQVLDNLTMEKSDLEMQYETLQEELMALKKNHKEEMSQLTGQNSGDVNVEINVAPGKDLTKTLNDMRQEYEQLIAKNRKDIENQYETQITQIEHEVSSSGQEVQSSAKEVTQLRHGVQELEIELQSQLSKKAALEKSLE…	4623	1926	1	1	1	896.368	1790.72	2	1790.72	0.0004	0	84.38	5.3e-08	R	GGSGGSYGGGGSGGGYGGGSGSR	G
5	1::sp|cRAP041|P35527|K1C9_HUMAN	Keratin, type I cytoskeletal 9 OS=Homo sapiens GN=KRT9 PE=1 SV=3	2080	62255	63	63	31	31	52.8	623	MSCRQFSSSYLSRSGGGGGGGLGSGGSIRSSYSRFSSSGGGGGGGRFSSSSGYGGGSSRVCGRGGGGSFGYSYGGGSGGGFSASSLGGGFGGGSRGFGGASGGGYSSSGGFGGGFGGGSGGGFGGGYGSGFGGFGGFGGGAGGGDGGILTANEKSTMQELNSRLASYLDKVQALEEANNDLENKIQDWYDKKGPAAIQKNYSPYYNTIDDLKDQIVDLTVGNNKTLLDIDNTRMTLDDFRIKFEMEQNLRQGVDADINGLRQVLDNLTMEKSDLEMQYETLQEELMALKKNHKEEMSQLTGQNSGDVNVEINVAPGKDLTKTLNDMRQEYEQLIAKNRKDIENQYETQITQIEHEVSSSGQEVQSSAKEVTQLRHGVQELEIELQSQLSKKAALEKSLE…	4704	3317	1	1	1	604.957	1811.85	3	1811.85	-0.0016	1	49.75	0.0013	R	SGGGGGGGLGSGGSIRSSYSR	F
5	1::sp|cRAP041|P35527|K1C9_HUMAN	Keratin, type I cytoskeletal 9 OS=Homo sapiens GN=KRT9 PE=1 SV=3	2080	62255	63	63	31	31	52.8	623	MSCRQFSSSYLSRSGGGGGGGLGSGGSIRSSYSRFSSSGGGGGGGRFSSSSGYGGGSSRVCGRGGGGSFGYSYGGGSGGGFSASSLGGGFGGGSRGFGGASGGGYSSSGGFGGGFGGGSGGGFGGGYGSGFGGFGGFGGGAGGGDGGILTANEKSTMQELNSRLASYLDKVQALEEANNDLENKIQDWYDKKGPAAIQKNYSPYYNTIDDLKDQIVDLTVGNNKTLLDIDNTRMTLDDFRIKFEMEQNLRQGVDADINGLRQVLDNLTMEKSDLEMQYETLQEELMALKKNHKEEMSQLTGQNSGDVNVEINVAPGKDLTKTLNDMRQEYEQLIAKNRKDIENQYETQITQIEHEVSSSGQEVQSSAKEVTQLRHGVQELEIELQSQLSKKAALEKSLE…	4797	5846	1	1	1	919.484	1836.95	2	1836.96	-0.0048	0	82.35	6.5e-07	R	HGVQELEIELQSQLSK	K
5	1::sp|cRAP041|P35527|K1C9_HUMAN	Keratin, type I cytoskeletal 9 OS=Homo sapiens GN=KRT9 PE=1 SV=3	2080	62255	63	63	31	31	52.8	623	MSCRQFSSSYLSRSGGGGGGGLGSGGSIRSSYSRFSSSGGGGGGGRFSSSSGYGGGSSRVCGRGGGGSFGYSYGGGSGGGFSASSLGGGFGGGSRGFGGASGGGYSSSGGFGGGFGGGSGGGFGGGYGSGFGGFGGFGGGAGGGDGGILTANEKSTMQELNSRLASYLDKVQALEEANNDLENKIQDWYDKKGPAAIQKNYSPYYNTIDDLKDQIVDLTVGNNKTLLDIDNTRMTLDDFRIKFEMEQNLRQGVDADINGLRQVLDNLTMEKSDLEMQYETLQEELMALKKNHKEEMSQLTGQNSGDVNVEINVAPGKDLTKTLNDMRQEYEQLIAKNRKDIENQYETQITQIEHEVSSSGQEVQSSAKEVTQLRHGVQELEIELQSQLSKKAALEKSLE…	4798	6126	1	1	1	613.326	1836.96	3	1836.96	-0.0023	0	38.11	0.017	R	HGVQELEIELQSQLSK	K
5	1::sp|cRAP041|P35527|K1C9_HUMAN	Keratin, type I cytoskeletal 9 OS=Homo sapiens GN=KRT9 PE=1 SV=3	2080	62255	63	63	31	31	52.8	623	MSCRQFSSSYLSRSGGGGGGGLGSGGSIRSSYSRFSSSGGGGGGGRFSSSSGYGGGSSRVCGRGGGGSFGYSYGGGSGGGFSASSLGGGFGGGSRGFGGASGGGYSSSGGFGGGFGGGSGGGFGGGYGSGFGGFGGFGGGAGGGDGGILTANEKSTMQELNSRLASYLDKVQALEEANNDLENKIQDWYDKKGPAAIQKNYSPYYNTIDDLKDQIVDLTVGNNKTLLDIDNTRMTLDDFRIKFEMEQNLRQGVDADINGLRQVLDNLTMEKSDLEMQYETLQEELMALKKNHKEEMSQLTGQNSGDVNVEINVAPGKDLTKTLNDMRQEYEQLIAKNRKDIENQYETQITQIEHEVSSSGQEVQSSAKEVTQLRHGVQELEIELQSQLSKKAALEKSLE…	4799	5819	1	1	1	613.326	1836.96	3	1836.96	-0.0009	0	84.98	3.4e-07	R	HGVQELEIELQSQLSK	K
5	1::sp|cRAP041|P35527|K1C9_HUMAN	Keratin, type I cytoskeletal 9 OS=Homo sapiens GN=KRT9 PE=1 SV=3	2080	62255	63	63	31	31	52.8	623	MSCRQFSSSYLSRSGGGGGGGLGSGGSIRSSYSRFSSSGGGGGGGRFSSSSGYGGGSSRVCGRGGGGSFGYSYGGGSGGGFSASSLGGGFGGGSRGFGGASGGGYSSSGGFGGGFGGGSGGGFGGGYGSGFGGFGGFGGGAGGGDGGILTANEKSTMQELNSRLASYLDKVQALEEANNDLENKIQDWYDKKGPAAIQKNYSPYYNTIDDLKDQIVDLTVGNNKTLLDIDNTRMTLDDFRIKFEMEQNLRQGVDADINGLRQVLDNLTMEKSDLEMQYETLQEELMALKKNHKEEMSQLTGQNSGDVNVEINVAPGKDLTKTLNDMRQEYEQLIAKNRKDIENQYETQITQIEHEVSSSGQEVQSSAKEVTQLRHGVQELEIELQSQLSKKAALEKSLE…	4806	5953	1	1	1	613.66	1837.96	3	1837.94	0.016	0	60.26	9.7e-05	R	HGVQELEIELQSQLSK	K
5	1::sp|cRAP041|P35527|K1C9_HUMAN	Keratin, type I cytoskeletal 9 OS=Homo sapiens GN=KRT9 PE=1 SV=3	2080	62255	63	63	31	31	52.8	623	MSCRQFSSSYLSRSGGGGGGGLGSGGSIRSSYSRFSSSGGGGGGGRFSSSSGYGGGSSRVCGRGGGGSFGYSYGGGSGGGFSASSLGGGFGGGSRGFGGASGGGYSSSGGFGGGFGGGSGGGFGGGYGSGFGGFGGFGGGAGGGDGGILTANEKSTMQELNSRLASYLDKVQALEEANNDLENKIQDWYDKKGPAAIQKNYSPYYNTIDDLKDQIVDLTVGNNKTLLDIDNTRMTLDDFRIKFEMEQNLRQGVDADINGLRQVLDNLTMEKSDLEMQYETLQEELMALKKNHKEEMSQLTGQNSGDVNVEINVAPGKDLTKTLNDMRQEYEQLIAKNRKDIENQYETQITQIEHEVSSSGQEVQSSAKEVTQLRHGVQELEIELQSQLSKKAALEKSLE…	4855	5415	1	1	1	926.466	1850.92	2	1850.92	-0.0012	1	31	0.13	K	TLNDMRQEYEQLIAK	N
5	1::sp|cRAP041|P35527|K1C9_HUMAN	Keratin, type I cytoskeletal 9 OS=Homo sapiens GN=KRT9 PE=1 SV=3	2080	62255	63	63	31	31	52.8	623	MSCRQFSSSYLSRSGGGGGGGLGSGGSIRSSYSRFSSSGGGGGGGRFSSSSGYGGGSSRVCGRGGGGSFGYSYGGGSGGGFSASSLGGGFGGGSRGFGGASGGGYSSSGGFGGGFGGGSGGGFGGGYGSGFGGFGGFGGGAGGGDGGILTANEKSTMQELNSRLASYLDKVQALEEANNDLENKIQDWYDKKGPAAIQKNYSPYYNTIDDLKDQIVDLTVGNNKTLLDIDNTRMTLDDFRIKFEMEQNLRQGVDADINGLRQVLDNLTMEKSDLEMQYETLQEELMALKKNHKEEMSQLTGQNSGDVNVEINVAPGKDLTKTLNDMRQEYEQLIAKNRKDIENQYETQITQIEHEVSSSGQEVQSSAKEVTQLRHGVQELEIELQSQLSKKAALEKSLE…	5210	5313	1	1	1	656.359	1966.05	3	1966.04	0.0165	1	38.62	0.01	R	HGVQELEIELQSQLSKK	A
5	1::sp|cRAP041|P35527|K1C9_HUMAN	Keratin, type I cytoskeletal 9 OS=Homo sapiens GN=KRT9 PE=1 SV=3	2080	62255	63	63	31	31	52.8	623	MSCRQFSSSYLSRSGGGGGGGLGSGGSIRSSYSRFSSSGGGGGGGRFSSSSGYGGGSSRVCGRGGGGSFGYSYGGGSGGGFSASSLGGGFGGGSRGFGGASGGGYSSSGGFGGGFGGGSGGGFGGGYGSGFGGFGGFGGGAGGGDGGILTANEKSTMQELNSRLASYLDKVQALEEANNDLENKIQDWYDKKGPAAIQKNYSPYYNTIDDLKDQIVDLTVGNNKTLLDIDNTRMTLDDFRIKFEMEQNLRQGVDADINGLRQVLDNLTMEKSDLEMQYETLQEELMALKKNHKEEMSQLTGQNSGDVNVEINVAPGKDLTKTLNDMRQEYEQLIAKNRKDIENQYETQITQIEHEVSSSGQEVQSSAKEVTQLRHGVQELEIELQSQLSKKAALEKSLE…	5543	2717	1	1	1	697.964	2090.87	3	2090.88	-0.004	1	38.82	0.005	R	GSRGGSGGSYGGGGSGGGYGGGSGSR	G
5	1::sp|cRAP041|P35527|K1C9_HUMAN	Keratin, type I cytoskeletal 9 OS=Homo sapiens GN=KRT9 PE=1 SV=3	2080	62255	63	63	31	31	52.8	623	MSCRQFSSSYLSRSGGGGGGGLGSGGSIRSSYSRFSSSGGGGGGGRFSSSSGYGGGSSRVCGRGGGGSFGYSYGGGSGGGFSASSLGGGFGGGSRGFGGASGGGYSSSGGFGGGFGGGSGGGFGGGYGSGFGGFGGFGGGAGGGDGGILTANEKSTMQELNSRLASYLDKVQALEEANNDLENKIQDWYDKKGPAAIQKNYSPYYNTIDDLKDQIVDLTVGNNKTLLDIDNTRMTLDDFRIKFEMEQNLRQGVDADINGLRQVLDNLTMEKSDLEMQYETLQEELMALKKNHKEEMSQLTGQNSGDVNVEINVAPGKDLTKTLNDMRQEYEQLIAKNRKDIENQYETQITQIEHEVSSSGQEVQSSAKEVTQLRHGVQELEIELQSQLSKKAALEKSLE…	5547	6367	1	1	1	699.017	2094.03	3	2094.03	-0.0003	0	72.03	1e-05	R	QEIECQNQEYSLLLSIK	M
5	1::sp|cRAP041|P35527|K1C9_HUMAN	Keratin, type I cytoskeletal 9 OS=Homo sapiens GN=KRT9 PE=1 SV=3	2080	62255	63	63	31	31	52.8	623	MSCRQFSSSYLSRSGGGGGGGLGSGGSIRSSYSRFSSSGGGGGGGRFSSSSGYGGGSSRVCGRGGGGSFGYSYGGGSGGGFSASSLGGGFGGGSRGFGGASGGGYSSSGGFGGGFGGGSGGGFGGGYGSGFGGFGGFGGGAGGGDGGILTANEKSTMQELNSRLASYLDKVQALEEANNDLENKIQDWYDKKGPAAIQKNYSPYYNTIDDLKDQIVDLTVGNNKTLLDIDNTRMTLDDFRIKFEMEQNLRQGVDADINGLRQVLDNLTMEKSDLEMQYETLQEELMALKKNHKEEMSQLTGQNSGDVNVEINVAPGKDLTKTLNDMRQEYEQLIAKNRKDIENQYETQITQIEHEVSSSGQEVQSSAKEVTQLRHGVQELEIELQSQLSKKAALEKSLE…	5548	6360	1	1	1	1048.02	2094.03	2	2094.03	0.0006	0	108.97	2.1e-09	R	QEIECQNQEYSLLLSIK	M
5	1::sp|cRAP041|P35527|K1C9_HUMAN	Keratin, type I cytoskeletal 9 OS=Homo sapiens GN=KRT9 PE=1 SV=3	2080	62255	63	63	31	31	52.8	623	MSCRQFSSSYLSRSGGGGGGGLGSGGSIRSSYSRFSSSGGGGGGGRFSSSSGYGGGSSRVCGRGGGGSFGYSYGGGSGGGFSASSLGGGFGGGSRGFGGASGGGYSSSGGFGGGFGGGSGGGFGGGYGSGFGGFGGFGGGAGGGDGGILTANEKSTMQELNSRLASYLDKVQALEEANNDLENKIQDWYDKKGPAAIQKNYSPYYNTIDDLKDQIVDLTVGNNKTLLDIDNTRMTLDDFRIKFEMEQNLRQGVDADINGLRQVLDNLTMEKSDLEMQYETLQEELMALKKNHKEEMSQLTGQNSGDVNVEINVAPGKDLTKTLNDMRQEYEQLIAKNRKDIENQYETQITQIEHEVSSSGQEVQSSAKEVTQLRHGVQELEIELQSQLSKKAALEKSLE…	5800	2852	1	1	1	733.654	2197.94	3	2197.94	0.0039	1	38.46	0.0079	R	FSSSGGGGGGGRFSSSSGYGGGSSR	V
5	1::sp|cRAP041|P35527|K1C9_HUMAN	Keratin, type I cytoskeletal 9 OS=Homo sapiens GN=KRT9 PE=1 SV=3	2080	62255	63	63	31	31	52.8	623	MSCRQFSSSYLSRSGGGGGGGLGSGGSIRSSYSRFSSSGGGGGGGRFSSSSGYGGGSSRVCGRGGGGSFGYSYGGGSGGGFSASSLGGGFGGGSRGFGGASGGGYSSSGGFGGGFGGGSGGGFGGGYGSGFGGFGGFGGGAGGGDGGILTANEKSTMQELNSRLASYLDKVQALEEANNDLENKIQDWYDKKGPAAIQKNYSPYYNTIDDLKDQIVDLTVGNNKTLLDIDNTRMTLDDFRIKFEMEQNLRQGVDADINGLRQVLDNLTMEKSDLEMQYETLQEELMALKKNHKEEMSQLTGQNSGDVNVEINVAPGKDLTKTLNDMRQEYEQLIAKNRKDIENQYETQITQIEHEVSSSGQEVQSSAKEVTQLRHGVQELEIELQSQLSKKAALEKSLE…	6196	6789	1	1	1	772.374	2314.1	3	2314.11	-0.0075	1	35.34	0.045	K	SDLEMQYETLQEELMALKK	N
5	1::sp|cRAP041|P35527|K1C9_HUMAN	Keratin, type I cytoskeletal 9 OS=Homo sapiens GN=KRT9 PE=1 SV=3	2080	62255	63	63	31	31	52.8	623	MSCRQFSSSYLSRSGGGGGGGLGSGGSIRSSYSRFSSSGGGGGGGRFSSSSGYGGGSSRVCGRGGGGSFGYSYGGGSGGGFSASSLGGGFGGGSRGFGGASGGGYSSSGGFGGGFGGGSGGGFGGGYGSGFGGFGGFGGGAGGGDGGILTANEKSTMQELNSRLASYLDKVQALEEANNDLENKIQDWYDKKGPAAIQKNYSPYYNTIDDLKDQIVDLTVGNNKTLLDIDNTRMTLDDFRIKFEMEQNLRQGVDADINGLRQVLDNLTMEKSDLEMQYETLQEELMALKKNHKEEMSQLTGQNSGDVNVEINVAPGKDLTKTLNDMRQEYEQLIAKNRKDIENQYETQITQIEHEVSSSGQEVQSSAKEVTQLRHGVQELEIELQSQLSKKAALEKSLE…	6197	6637	1	1	1	772.375	2314.1	3	2314.11	-0.0044	1	34.24	0.059	K	SDLEMQYETLQEELMALKK	N
5	1::sp|cRAP041|P35527|K1C9_HUMAN	Keratin, type I cytoskeletal 9 OS=Homo sapiens GN=KRT9 PE=1 SV=3	2080	62255	63	63	31	31	52.8	623	MSCRQFSSSYLSRSGGGGGGGLGSGGSIRSSYSRFSSSGGGGGGGRFSSSSGYGGGSSRVCGRGGGGSFGYSYGGGSGGGFSASSLGGGFGGGSRGFGGASGGGYSSSGGFGGGFGGGSGGGFGGGYGSGFGGFGGFGGGAGGGDGGILTANEKSTMQELNSRLASYLDKVQALEEANNDLENKIQDWYDKKGPAAIQKNYSPYYNTIDDLKDQIVDLTVGNNKTLLDIDNTRMTLDDFRIKFEMEQNLRQGVDADINGLRQVLDNLTMEKSDLEMQYETLQEELMALKKNHKEEMSQLTGQNSGDVNVEINVAPGKDLTKTLNDMRQEYEQLIAKNRKDIENQYETQITQIEHEVSSSGQEVQSSAKEVTQLRHGVQELEIELQSQLSKKAALEKSLE…	6253	6558	1	1	1	778.041	2331.1	3	2331.09	0.0153	1	68.5	2.4e-05	K	SDLEMQYETLQEELMALKK	N
5	1::sp|cRAP041|P35527|K1C9_HUMAN	Keratin, type I cytoskeletal 9 OS=Homo sapiens GN=KRT9 PE=1 SV=3	2080	62255	63	63	31	31	52.8	623	MSCRQFSSSYLSRSGGGGGGGLGSGGSIRSSYSRFSSSGGGGGGGRFSSSSGYGGGSSRVCGRGGGGSFGYSYGGGSGGGFSASSLGGGFGGGSRGFGGASGGGYSSSGGFGGGFGGGSGGGFGGGYGSGFGGFGGFGGGAGGGDGGILTANEKSTMQELNSRLASYLDKVQALEEANNDLENKIQDWYDKKGPAAIQKNYSPYYNTIDDLKDQIVDLTVGNNKTLLDIDNTRMTLDDFRIKFEMEQNLRQGVDADINGLRQVLDNLTMEKSDLEMQYETLQEELMALKKNHKEEMSQLTGQNSGDVNVEINVAPGKDLTKTLNDMRQEYEQLIAKNRKDIENQYETQITQIEHEVSSSGQEVQSSAKEVTQLRHGVQELEIELQSQLSKKAALEKSLE…	6389	5452	1	1	1	793.068	2376.18	3	2376.18	0.0002	1	83.51	8.2e-07	R	LASYLDKVQALEEANNDLENK	I
5	1::sp|cRAP041|P35527|K1C9_HUMAN	Keratin, type I cytoskeletal 9 OS=Homo sapiens GN=KRT9 PE=1 SV=3	2080	62255	63	63	31	31	52.8	623	MSCRQFSSSYLSRSGGGGGGGLGSGGSIRSSYSRFSSSGGGGGGGRFSSSSGYGGGSSRVCGRGGGGSFGYSYGGGSGGGFSASSLGGGFGGGSRGFGGASGGGYSSSGGFGGGFGGGSGGGFGGGYGSGFGGFGGFGGGAGGGDGGILTANEKSTMQELNSRLASYLDKVQALEEANNDLENKIQDWYDKKGPAAIQKNYSPYYNTIDDLKDQIVDLTVGNNKTLLDIDNTRMTLDDFRIKFEMEQNLRQGVDADINGLRQVLDNLTMEKSDLEMQYETLQEELMALKKNHKEEMSQLTGQNSGDVNVEINVAPGKDLTKTLNDMRQEYEQLIAKNRKDIENQYETQITQIEHEVSSSGQEVQSSAKEVTQLRHGVQELEIELQSQLSKKAALEKSLE…	6716	4853	1	1	1	1255.57	2509.12	2	2509.12	-0.005	0	45.42	0.0031	K	EIETYHNLLEGGQEDFESSGAGK	I
5	1::sp|cRAP041|P35527|K1C9_HUMAN	Keratin, type I cytoskeletal 9 OS=Homo sapiens GN=KRT9 PE=1 SV=3	2080	62255	63	63	31	31	52.8	623	MSCRQFSSSYLSRSGGGGGGGLGSGGSIRSSYSRFSSSGGGGGGGRFSSSSGYGGGSSRVCGRGGGGSFGYSYGGGSGGGFSASSLGGGFGGGSRGFGGASGGGYSSSGGFGGGFGGGSGGGFGGGYGSGFGGFGGFGGGAGGGDGGILTANEKSTMQELNSRLASYLDKVQALEEANNDLENKIQDWYDKKGPAAIQKNYSPYYNTIDDLKDQIVDLTVGNNKTLLDIDNTRMTLDDFRIKFEMEQNLRQGVDADINGLRQVLDNLTMEKSDLEMQYETLQEELMALKKNHKEEMSQLTGQNSGDVNVEINVAPGKDLTKTLNDMRQEYEQLIAKNRKDIENQYETQITQIEHEVSSSGQEVQSSAKEVTQLRHGVQELEIELQSQLSKKAALEKSLE…	6717	4839	1	1	1	837.382	2509.12	3	2509.12	-0.0012	0	88.17	1.7e-07	K	EIETYHNLLEGGQEDFESSGAGK	I
5	1::sp|cRAP041|P35527|K1C9_HUMAN	Keratin, type I cytoskeletal 9 OS=Homo sapiens GN=KRT9 PE=1 SV=3	2080	62255	63	63	31	31	52.8	623	MSCRQFSSSYLSRSGGGGGGGLGSGGSIRSSYSRFSSSGGGGGGGRFSSSSGYGGGSSRVCGRGGGGSFGYSYGGGSGGGFSASSLGGGFGGGSRGFGGASGGGYSSSGGFGGGFGGGSGGGFGGGYGSGFGGFGGFGGGAGGGDGGILTANEKSTMQELNSRLASYLDKVQALEEANNDLENKIQDWYDKKGPAAIQKNYSPYYNTIDDLKDQIVDLTVGNNKTLLDIDNTRMTLDDFRIKFEMEQNLRQGVDADINGLRQVLDNLTMEKSDLEMQYETLQEELMALKKNHKEEMSQLTGQNSGDVNVEINVAPGKDLTKTLNDMRQEYEQLIAKNRKDIENQYETQITQIEHEVSSSGQEVQSSAKEVTQLRHGVQELEIELQSQLSKKAALEKSLE…	7066	5801	1	1	1	902.39	2704.15	3	2704.15	-0.0046	0	67.83	9.2e-06	R	GGGGSFGYSYGGGSGGGFSASSLGGGFGGGSR	G
5	1::sp|cRAP041|P35527|K1C9_HUMAN	Keratin, type I cytoskeletal 9 OS=Homo sapiens GN=KRT9 PE=1 SV=3	2080	62255	63	63	31	31	52.8	623	MSCRQFSSSYLSRSGGGGGGGLGSGGSIRSSYSRFSSSGGGGGGGRFSSSSGYGGGSSRVCGRGGGGSFGYSYGGGSGGGFSASSLGGGFGGGSRGFGGASGGGYSSSGGFGGGFGGGSGGGFGGGYGSGFGGFGGFGGGAGGGDGGILTANEKSTMQELNSRLASYLDKVQALEEANNDLENKIQDWYDKKGPAAIQKNYSPYYNTIDDLKDQIVDLTVGNNKTLLDIDNTRMTLDDFRIKFEMEQNLRQGVDADINGLRQVLDNLTMEKSDLEMQYETLQEELMALKKNHKEEMSQLTGQNSGDVNVEINVAPGKDLTKTLNDMRQEYEQLIAKNRKDIENQYETQITQIEHEVSSSGQEVQSSAKEVTQLRHGVQELEIELQSQLSKKAALEKSLE…	7067	5806	1	1	1	1353.08	2704.15	2	2704.15	0.001	0	75.39	1.7e-06	R	GGGGSFGYSYGGGSGGGFSASSLGGGFGGGSR	G
5	1::sp|cRAP041|P35527|K1C9_HUMAN	Keratin, type I cytoskeletal 9 OS=Homo sapiens GN=KRT9 PE=1 SV=3	2080	62255	63	63	31	31	52.8	623	MSCRQFSSSYLSRSGGGGGGGLGSGGSIRSSYSRFSSSGGGGGGGRFSSSSGYGGGSSRVCGRGGGGSFGYSYGGGSGGGFSASSLGGGFGGGSRGFGGASGGGYSSSGGFGGGFGGGSGGGFGGGYGSGFGGFGGFGGGAGGGDGGILTANEKSTMQELNSRLASYLDKVQALEEANNDLENKIQDWYDKKGPAAIQKNYSPYYNTIDDLKDQIVDLTVGNNKTLLDIDNTRMTLDDFRIKFEMEQNLRQGVDADINGLRQVLDNLTMEKSDLEMQYETLQEELMALKKNHKEEMSQLTGQNSGDVNVEINVAPGKDLTKTLNDMRQEYEQLIAKNRKDIENQYETQITQIEHEVSSSGQEVQSSAKEVTQLRHGVQELEIELQSQLSKKAALEKSLE…	7422	5138	1	1	1	720.844	2879.35	4	2879.35	0.0008	1	65.84	4.3e-05	R	LEKEIETYHNLLEGGQEDFESSGAGK	I
5	1::sp|cRAP041|P35527|K1C9_HUMAN	Keratin, type I cytoskeletal 9 OS=Homo sapiens GN=KRT9 PE=1 SV=3	2080	62255	63	63	31	31	52.8	623	MSCRQFSSSYLSRSGGGGGGGLGSGGSIRSSYSRFSSSGGGGGGGRFSSSSGYGGGSSRVCGRGGGGSFGYSYGGGSGGGFSASSLGGGFGGGSRGFGGASGGGYSSSGGFGGGFGGGSGGGFGGGYGSGFGGFGGFGGGAGGGDGGILTANEKSTMQELNSRLASYLDKVQALEEANNDLENKIQDWYDKKGPAAIQKNYSPYYNTIDDLKDQIVDLTVGNNKTLLDIDNTRMTLDDFRIKFEMEQNLRQGVDADINGLRQVLDNLTMEKSDLEMQYETLQEELMALKKNHKEEMSQLTGQNSGDVNVEINVAPGKDLTKTLNDMRQEYEQLIAKNRKDIENQYETQITQIEHEVSSSGQEVQSSAKEVTQLRHGVQELEIELQSQLSKKAALEKSLE…	7996	6436	1	1	1	1088.84	3263.5	3	3263.51	-0.0026	0	73.36	7e-06	K	DIENQYETQITQIEHEVSSSGQEVQSSAK	E
5	1::sp|cRAP041|P35527|K1C9_HUMAN	Keratin, type I cytoskeletal 9 OS=Homo sapiens GN=KRT9 PE=1 SV=3	2080	62255	63	63	31	31	52.8	623	MSCRQFSSSYLSRSGGGGGGGLGSGGSIRSSYSRFSSSGGGGGGGRFSSSSGYGGGSSRVCGRGGGGSFGYSYGGGSGGGFSASSLGGGFGGGSRGFGGASGGGYSSSGGFGGGFGGGSGGGFGGGYGSGFGGFGGFGGGAGGGDGGILTANEKSTMQELNSRLASYLDKVQALEEANNDLENKIQDWYDKKGPAAIQKNYSPYYNTIDDLKDQIVDLTVGNNKTLLDIDNTRMTLDDFRIKFEMEQNLRQGVDADINGLRQVLDNLTMEKSDLEMQYETLQEELMALKKNHKEEMSQLTGQNSGDVNVEINVAPGKDLTKTLNDMRQEYEQLIAKNRKDIENQYETQITQIEHEVSSSGQEVQSSAKEVTQLRHGVQELEIELQSQLSKKAALEKSLE…	7997	6462	1	1	1	816.885	3263.51	4	3263.51	0.0031	0	67.68	2.7e-05	K	DIENQYETQITQIEHEVSSSGQEVQSSAK	E
5	1::sp|cRAP041|P35527|K1C9_HUMAN	Keratin, type I cytoskeletal 9 OS=Homo sapiens GN=KRT9 PE=1 SV=3	2080	62255	63	63	31	31	52.8	623	MSCRQFSSSYLSRSGGGGGGGLGSGGSIRSSYSRFSSSGGGGGGGRFSSSSGYGGGSSRVCGRGGGGSFGYSYGGGSGGGFSASSLGGGFGGGSRGFGGASGGGYSSSGGFGGGFGGGSGGGFGGGYGSGFGGFGGFGGGAGGGDGGILTANEKSTMQELNSRLASYLDKVQALEEANNDLENKIQDWYDKKGPAAIQKNYSPYYNTIDDLKDQIVDLTVGNNKTLLDIDNTRMTLDDFRIKFEMEQNLRQGVDADINGLRQVLDNLTMEKSDLEMQYETLQEELMALKKNHKEEMSQLTGQNSGDVNVEINVAPGKDLTKTLNDMRQEYEQLIAKNRKDIENQYETQITQIEHEVSSSGQEVQSSAKEVTQLRHGVQELEIELQSQLSKKAALEKSLE…	7999	6664	1	1	1	1089.5	3265.49	3	3265.47	0.0157	0	24.87	0.44	K	DIENQYETQITQIEHEVSSSGQEVQSSAK	E
5	1::sp|cRAP041|P35527|K1C9_HUMAN	Keratin, type I cytoskeletal 9 OS=Homo sapiens GN=KRT9 PE=1 SV=3	2080	62255	63	63	31	31	52.8	623	MSCRQFSSSYLSRSGGGGGGGLGSGGSIRSSYSRFSSSGGGGGGGRFSSSSGYGGGSSRVCGRGGGGSFGYSYGGGSGGGFSASSLGGGFGGGSRGFGGASGGGYSSSGGFGGGFGGGSGGGFGGGYGSGFGGFGGFGGGAGGGDGGILTANEKSTMQELNSRLASYLDKVQALEEANNDLENKIQDWYDKKGPAAIQKNYSPYYNTIDDLKDQIVDLTVGNNKTLLDIDNTRMTLDDFRIKFEMEQNLRQGVDADINGLRQVLDNLTMEKSDLEMQYETLQEELMALKKNHKEEMSQLTGQNSGDVNVEINVAPGKDLTKTLNDMRQEYEQLIAKNRKDIENQYETQITQIEHEVSSSGQEVQSSAKEVTQLRHGVQELEIELQSQLSKKAALEKSLE…	8135	5612	1	1	1	848.908	3391.6	4	3391.6	0.0027	1	66.05	4.5e-05	R	KDIENQYETQITQIEHEVSSSGQEVQSSAK	E
5	2::tr|A0A151PC86|A0A151PC86_ALLMI	Keratin, type I cytoskeletal 19 OS=Alligator mississippiensis OX=8496 GN=KRT9 PE=3 SV=1	39	41960	2	2	1	1	1.9	369	MSSGSYSGIGGFGCGSGGGFGEGSIGFGGGSIGFGGGSIGGGGGFGGDDTGFLSNNEKMTMQNLNERLASYLDKVRCLEEDNLQLEHLIREWYQTHGPQGGKDYSHYYGPIEDLLNQIVLATVANNKIILDLDNARMTAEDFRMKYETEYSLRQSVEGDINGLRPVLDNLTLAKSDLEMQFESLREELIQLKKNHQEEMSSLQSESGGDVSVEVSAAPGEDLMGKLNEMRKEYEYIIQRNREEVERWYESKMEEVRHEVHTSGQEIESSNQQVSELRREYQRLEIELQSQLSTLQSLQSNLEDTDYRYNMQLQQIQNMIIPVEEELASIRCEMESQNEEYKMLLGIKTRLEQEICQYRELLDEGQHDIG	166	2713	1	0	0	405.224	808.433	2	808.433	-0.0005	0	39.49	0.0018	R	LASYLDK	V
5	2::tr|A0A151PC86|A0A151PC86_ALLMI	Keratin, type I cytoskeletal 19 OS=Alligator mississippiensis OX=8496 GN=KRT9 PE=3 SV=1	39	41960	2	2	1	1	1.9	369	MSSGSYSGIGGFGCGSGGGFGEGSIGFGGGSIGFGGGSIGGGGGFGGDDTGFLSNNEKMTMQNLNERLASYLDKVRCLEEDNLQLEHLIREWYQTHGPQGGKDYSHYYGPIEDLLNQIVLATVANNKIILDLDNARMTAEDFRMKYETEYSLRQSVEGDINGLRPVLDNLTLAKSDLEMQFESLREELIQLKKNHQEEMSSLQSESGGDVSVEVSAAPGEDLMGKLNEMRKEYEYIIQRNREEVERWYESKMEEVRHEVHTSGQEIESSNQQVSELRREYQRLEIELQSQLSTLQSLQSNLEDTDYRYNMQLQQIQNMIIPVEEELASIRCEMESQNEEYKMLLGIKTRLEQEICQYRELLDEGQHDIG	167	2822	1	0	0	405.225	808.435	2	808.433	0.0017	0	30.98	0.013	R	LASYLDK	V
5	2::tr|A0A151PCC2|A0A151PCC2_ALLMI	Keratin, type I cytoskeletal 10-like OS=Alligator mississippiensis OX=8496 GN=Y1Q_0018447 PE=3 SV=1	39	36842	2	2	1	1	2.1	334	MSGGSFGPSGGGICGGYGGGAGGFGGGGAGFGGGYGGGPGPCGFGGSGGFSGGGFSGSGGFGGGGFSGGGGGFSGGSFGGDDTGLLSNNEKMTMQNLNERLASYLDKVRRLEEENANLEQLIREWYQKQGPQGGRDYSQYYKTIEDLQNQIISATVDLNKVLLDVDNTRMTADDFRMNVEVNAAPGTNLTEKLNEMRGEYERLIENNRREVESWFEAKMEEVNQQVHSSSQEMESSNQQVSELRREYQTLEIELQSLLSMLQSFQSNLEDTERRYNMQLQQIQAMIIPVEEELANIRCEMESQNEEYKMLLVWQQRWRKPWVCKKILTRDTNDP	166	2713	1	0	0	405.224	808.433	2	808.433	-0.0005	0	39.49	0.0018	R	LASYLDK	V
5	2::tr|A0A151PCC2|A0A151PCC2_ALLMI	Keratin, type I cytoskeletal 10-like OS=Alligator mississippiensis OX=8496 GN=Y1Q_0018447 PE=3 SV=1	39	36842	2	2	1	1	2.1	334	MSGGSFGPSGGGICGGYGGGAGGFGGGGAGFGGGYGGGPGPCGFGGSGGFSGGGFSGSGGFGGGGFSGGGGGFSGGSFGGDDTGLLSNNEKMTMQNLNERLASYLDKVRRLEEENANLEQLIREWYQKQGPQGGRDYSQYYKTIEDLQNQIISATVDLNKVLLDVDNTRMTADDFRMNVEVNAAPGTNLTEKLNEMRGEYERLIENNRREVESWFEAKMEEVNQQVHSSSQEMESSNQQVSELRREYQTLEIELQSLLSMLQSFQSNLEDTERRYNMQLQQIQAMIIPVEEELANIRCEMESQNEEYKMLLVWQQRWRKPWVCKKILTRDTNDP	167	2822	1	0	0	405.225	808.435	2	808.433	0.0017	0	30.98	0.013	R	LASYLDK	V
5	2::tr|A0A151PCD7|A0A151PCD7_ALLMI	Keratin, type I cytoskeletal 10-like OS=Alligator mississippiensis OX=8496 GN=Y1Q_0018448 PE=3 SV=1	39	28433	2	2	1	1	2.9	238	MTMQNLNERLASYLDKVRHLEEENANLERLIREWYQNHGPQYGRDYSQYYGPIEDLQNQIISATVDFNKEMRGLQSQSGGDVNVEVNTTPDSNLMQKLNEMRCEYEQIIENNRKEVERWYETKMEEVNQEVHTSGQEIQSSNHQVSELRREYQTLEIELQSQLSMLQSLQSNLEDTERRYNMQLQQIQNTITTVEEELASIRCEIESQNYEYKMLLDINLARAMEKAMGMEEIPNQRY	166	2713	1	0	0	405.224	808.433	2	808.433	-0.0005	0	39.49	0.0018	R	LASYLDK	V
5	2::tr|A0A151PCD7|A0A151PCD7_ALLMI	Keratin, type I cytoskeletal 10-like OS=Alligator mississippiensis OX=8496 GN=Y1Q_0018448 PE=3 SV=1	39	28433	2	2	1	1	2.9	238	MTMQNLNERLASYLDKVRHLEEENANLERLIREWYQNHGPQYGRDYSQYYGPIEDLQNQIISATVDFNKEMRGLQSQSGGDVNVEVNTTPDSNLMQKLNEMRCEYEQIIENNRKEVERWYETKMEEVNQEVHTSGQEIQSSNHQVSELRREYQTLEIELQSQLSMLQSLQSNLEDTERRYNMQLQQIQNTITTVEEELASIRCEIESQNYEYKMLLDINLARAMEKAMGMEEIPNQRY	167	2822	1	0	0	405.225	808.435	2	808.433	0.0017	0	30.98	0.013	R	LASYLDK	V
5	2::tr|A0A151PCI8|A0A151PCI8_ALLMI	Keratin, type I cytoskeletal 10-like OS=Alligator mississippiensis OX=8496 GN=Y1Q_0018445 PE=3 SV=1	39	31323	2	2	1	1	2.6	274	MQNLNDRLASYLDKVRCLEEENAELECRIREWYTKHGPTCEPKDYSCYLREIEDLQNQIVCATIENNKIVLNIDNSRMAADDFRVKYETELSLLQSVEADINGLRQVLDQLTLCRSDLEAQLEALREELCCLKKNHEEEMNCLRKQSTGDVSVEQLAELRAEIECQNQEYKALLDVKCRLEQEIHTYCCLLEGGHREFSSKGVISSGGISSGGISSGISHSSGIGGGGICKSSGGIIGGGGIVKTIHTHSSSSHCLPSPCPPGDIKVPCRRLHD	166	2713	1	0	0	405.224	808.433	2	808.433	-0.0005	0	39.49	0.0018	R	LASYLDK	V
5	2::tr|A0A151PCI8|A0A151PCI8_ALLMI	Keratin, type I cytoskeletal 10-like OS=Alligator mississippiensis OX=8496 GN=Y1Q_0018445 PE=3 SV=1	39	31323	2	2	1	1	2.6	274	MQNLNDRLASYLDKVRCLEEENAELECRIREWYTKHGPTCEPKDYSCYLREIEDLQNQIVCATIENNKIVLNIDNSRMAADDFRVKYETELSLLQSVEADINGLRQVLDQLTLCRSDLEAQLEALREELCCLKKNHEEEMNCLRKQSTGDVSVEQLAELRAEIECQNQEYKALLDVKCRLEQEIHTYCCLLEGGHREFSSKGVISSGGISSGGISSGISHSSGIGGGGICKSSGGIIGGGGIVKTIHTHSSSSHCLPSPCPPGDIKVPCRRLHD	167	2822	1	0	0	405.225	808.435	2	808.433	0.0017	0	30.98	0.013	R	LASYLDK	V
6	1::sp|cRAP039|P13645|K1C10_HUMAN	Keratin, type I cytoskeletal 10 OS=Homo sapiens GN=KRT10 PE=1 SV=6	1874	59020	58	58	28	28	49.7	584	MSVRYSSSKHYSSSRSGGGGGGGGCGGGGGVSSLRISSSKGSLGGGFSSGGFSGGSFSRGSSGGGCFGGSSGGYGGLGGFGGGSFRGSYGSSSFGGSYGGIFGGGSFGGGSFGGGSFGGGGFGGGGFGGGFGGGFGGDGGLLSGNEKVTMQNLNDRLASYLDKVRALEESNYELEGKIKEWYEKHGNSHQGEPRDYSKYYKTIDDLKNQILNLTTDNANILLQIDNARLAADDFRLKYENEVALRQSVEADINGLRRVLDELTLTKADLEMQIESLTEELAYLKKNHEEEMKDLRNVSTGDVNVEMNAAPGVDLTQLLNNMRSQYEQLAEQNRKDAEAWFNEKSKELTTEIDNNIEQISSYKSEITELRRNVQALEIELQSQLALKQSLEASLAETEGR…	153	3132	1	1	0	404.202	806.39	2	806.392	-0.0019	0	38.58	0.006	R	LAADDFR	L
6	1::sp|cRAP039|P13645|K1C10_HUMAN	Keratin, type I cytoskeletal 10 OS=Homo sapiens GN=KRT10 PE=1 SV=6	1874	59020	58	58	28	28	49.7	584	MSVRYSSSKHYSSSRSGGGGGGGGCGGGGGVSSLRISSSKGSLGGGFSSGGFSGGSFSRGSSGGGCFGGSSGGYGGLGGFGGGSFRGSYGSSSFGGSYGGIFGGGSFGGGSFGGGSFGGGGFGGGGFGGGFGGGFGGDGGLLSGNEKVTMQNLNDRLASYLDKVRALEESNYELEGKIKEWYEKHGNSHQGEPRDYSKYYKTIDDLKNQILNLTTDNANILLQIDNARLAADDFRLKYENEVALRQSVEADINGLRRVLDELTLTKADLEMQIESLTEELAYLKKNHEEEMKDLRNVSTGDVNVEMNAAPGVDLTQLLNNMRSQYEQLAEQNRKDAEAWFNEKSKELTTEIDNNIEQISSYKSEITELRRNVQALEIELQSQLALKQSLEASLAETEGR…	155	3005	1	1	0	404.203	806.392	2	806.392	-0.0001	0	44.19	0.0018	R	LAADDFR	L
6	1::sp|cRAP039|P13645|K1C10_HUMAN	Keratin, type I cytoskeletal 10 OS=Homo sapiens GN=KRT10 PE=1 SV=6	1874	59020	58	58	28	28	49.7	584	MSVRYSSSKHYSSSRSGGGGGGGGCGGGGGVSSLRISSSKGSLGGGFSSGGFSGGSFSRGSSGGGCFGGSSGGYGGLGGFGGGSFRGSYGSSSFGGSYGGIFGGGSFGGGSFGGGSFGGGGFGGGGFGGGFGGGFGGDGGLLSGNEKVTMQNLNDRLASYLDKVRALEESNYELEGKIKEWYEKHGNSHQGEPRDYSKYYKTIDDLKNQILNLTTDNANILLQIDNARLAADDFRLKYENEVALRQSVEADINGLRRVLDELTLTKADLEMQIESLTEELAYLKKNHEEEMKDLRNVSTGDVNVEMNAAPGVDLTQLLNNMRSQYEQLAEQNRKDAEAWFNEKSKELTTEIDNNIEQISSYKSEITELRRNVQALEIELQSQLALKQSLEASLAETEGR…	156	2593	1	1	0	404.204	806.393	2	806.392	0.0012	0	34.38	0.014	R	LAADDFR	L
6	1::sp|cRAP039|P13645|K1C10_HUMAN	Keratin, type I cytoskeletal 10 OS=Homo sapiens GN=KRT10 PE=1 SV=6	1874	59020	58	58	28	28	49.7	584	MSVRYSSSKHYSSSRSGGGGGGGGCGGGGGVSSLRISSSKGSLGGGFSSGGFSGGSFSRGSSGGGCFGGSSGGYGGLGGFGGGSFRGSYGSSSFGGSYGGIFGGGSFGGGSFGGGSFGGGGFGGGGFGGGFGGGFGGDGGLLSGNEKVTMQNLNDRLASYLDKVRALEESNYELEGKIKEWYEKHGNSHQGEPRDYSKYYKTIDDLKNQILNLTTDNANILLQIDNARLAADDFRLKYENEVALRQSVEADINGLRRVLDELTLTKADLEMQIESLTEELAYLKKNHEEEMKDLRNVSTGDVNVEMNAAPGVDLTQLLNNMRSQYEQLAEQNRKDAEAWFNEKSKELTTEIDNNIEQISSYKSEITELRRNVQALEIELQSQLALKQSLEASLAETEGR…	166	2713	1	0	0	405.224	808.433	2	808.433	-0.0005	0	39.49	0.0018	R	LASYLDK	V
6	1::sp|cRAP039|P13645|K1C10_HUMAN	Keratin, type I cytoskeletal 10 OS=Homo sapiens GN=KRT10 PE=1 SV=6	1874	59020	58	58	28	28	49.7	584	MSVRYSSSKHYSSSRSGGGGGGGGCGGGGGVSSLRISSSKGSLGGGFSSGGFSGGSFSRGSSGGGCFGGSSGGYGGLGGFGGGSFRGSYGSSSFGGSYGGIFGGGSFGGGSFGGGSFGGGGFGGGGFGGGFGGGFGGDGGLLSGNEKVTMQNLNDRLASYLDKVRALEESNYELEGKIKEWYEKHGNSHQGEPRDYSKYYKTIDDLKNQILNLTTDNANILLQIDNARLAADDFRLKYENEVALRQSVEADINGLRRVLDELTLTKADLEMQIESLTEELAYLKKNHEEEMKDLRNVSTGDVNVEMNAAPGVDLTQLLNNMRSQYEQLAEQNRKDAEAWFNEKSKELTTEIDNNIEQISSYKSEITELRRNVQALEIELQSQLALKQSLEASLAETEGR…	167	2822	1	0	0	405.225	808.435	2	808.433	0.0017	0	30.98	0.013	R	LASYLDK	V
6	1::sp|cRAP039|P13645|K1C10_HUMAN	Keratin, type I cytoskeletal 10 OS=Homo sapiens GN=KRT10 PE=1 SV=6	1874	59020	58	58	28	28	49.7	584	MSVRYSSSKHYSSSRSGGGGGGGGCGGGGGVSSLRISSSKGSLGGGFSSGGFSGGSFSRGSSGGGCFGGSSGGYGGLGGFGGGSFRGSYGSSSFGGSYGGIFGGGSFGGGSFGGGSFGGGGFGGGGFGGGFGGGFGGDGGLLSGNEKVTMQNLNDRLASYLDKVRALEESNYELEGKIKEWYEKHGNSHQGEPRDYSKYYKTIDDLKNQILNLTTDNANILLQIDNARLAADDFRLKYENEVALRQSVEADINGLRRVLDELTLTKADLEMQIESLTEELAYLKKNHEEEMKDLRNVSTGDVNVEMNAAPGVDLTQLLNNMRSQYEQLAEQNRKDAEAWFNEKSKELTTEIDNNIEQISSYKSEITELRRNVQALEIELQSQLALKQSLEASLAETEGR…	333	2749	1	1	0	424.23	846.445	2	846.445	-0.0001	0	38.23	0.016	K	SEITELR	R
6	1::sp|cRAP039|P13645|K1C10_HUMAN	Keratin, type I cytoskeletal 10 OS=Homo sapiens GN=KRT10 PE=1 SV=6	1874	59020	58	58	28	28	49.7	584	MSVRYSSSKHYSSSRSGGGGGGGGCGGGGGVSSLRISSSKGSLGGGFSSGGFSGGSFSRGSSGGGCFGGSSGGYGGLGGFGGGSFRGSYGSSSFGGSYGGIFGGGSFGGGSFGGGSFGGGGFGGGGFGGGFGGGFGGDGGLLSGNEKVTMQNLNDRLASYLDKVRALEESNYELEGKIKEWYEKHGNSHQGEPRDYSKYYKTIDDLKNQILNLTTDNANILLQIDNARLAADDFRLKYENEVALRQSVEADINGLRRVLDELTLTKADLEMQIESLTEELAYLKKNHEEEMKDLRNVSTGDVNVEMNAAPGVDLTQLLNNMRSQYEQLAEQNRKDAEAWFNEKSKELTTEIDNNIEQISSYKSEITELRRNVQALEIELQSQLALKQSLEASLAETEGR…	894	2689	1	1	0	497.253	992.492	2	992.493	-0.0004	0	46.61	0.0019	K	YENEVALR	Q
6	1::sp|cRAP039|P13645|K1C10_HUMAN	Keratin, type I cytoskeletal 10 OS=Homo sapiens GN=KRT10 PE=1 SV=6	1874	59020	58	58	28	28	49.7	584	MSVRYSSSKHYSSSRSGGGGGGGGCGGGGGVSSLRISSSKGSLGGGFSSGGFSGGSFSRGSSGGGCFGGSSGGYGGLGGFGGGSFRGSYGSSSFGGSYGGIFGGGSFGGGSFGGGSFGGGGFGGGGFGGGFGGGFGGDGGLLSGNEKVTMQNLNDRLASYLDKVRALEESNYELEGKIKEWYEKHGNSHQGEPRDYSKYYKTIDDLKNQILNLTTDNANILLQIDNARLAADDFRLKYENEVALRQSVEADINGLRRVLDELTLTKADLEMQIESLTEELAYLKKNHEEEMKDLRNVSTGDVNVEMNAAPGVDLTQLLNNMRSQYEQLAEQNRKDAEAWFNEKSKELTTEIDNNIEQISSYKSEITELRRNVQALEIELQSQLALKQSLEASLAETEGR…	910	2619	1	1	1	498.264	994.513	2	994.512	0.0002	1	40.92	0.0052	K	IKEWYEK	H
6	1::sp|cRAP039|P13645|K1C10_HUMAN	Keratin, type I cytoskeletal 10 OS=Homo sapiens GN=KRT10 PE=1 SV=6	1874	59020	58	58	28	28	49.7	584	MSVRYSSSKHYSSSRSGGGGGGGGCGGGGGVSSLRISSSKGSLGGGFSSGGFSGGSFSRGSSGGGCFGGSSGGYGGLGGFGGGSFRGSYGSSSFGGSYGGIFGGGSFGGGSFGGGSFGGGGFGGGGFGGGFGGGFGGDGGLLSGNEKVTMQNLNDRLASYLDKVRALEESNYELEGKIKEWYEKHGNSHQGEPRDYSKYYKTIDDLKNQILNLTTDNANILLQIDNARLAADDFRLKYENEVALRQSVEADINGLRRVLDELTLTKADLEMQIESLTEELAYLKKNHEEEMKDLRNVSTGDVNVEMNAAPGVDLTQLLNNMRSQYEQLAEQNRKDAEAWFNEKSKELTTEIDNNIEQISSYKSEITELRRNVQALEIELQSQLALKQSLEASLAETEGR…	946	1929	1	1	0	502.28	1002.55	2	1002.55	-0.0005	1	30.54	0.098	K	SEITELRR	N
6	1::sp|cRAP039|P13645|K1C10_HUMAN	Keratin, type I cytoskeletal 10 OS=Homo sapiens GN=KRT10 PE=1 SV=6	1874	59020	58	58	28	28	49.7	584	MSVRYSSSKHYSSSRSGGGGGGGGCGGGGGVSSLRISSSKGSLGGGFSSGGFSGGSFSRGSSGGGCFGGSSGGYGGLGGFGGGSFRGSYGSSSFGGSYGGIFGGGSFGGGSFGGGSFGGGGFGGGGFGGGFGGGFGGDGGLLSGNEKVTMQNLNDRLASYLDKVRALEESNYELEGKIKEWYEKHGNSHQGEPRDYSKYYKTIDDLKNQILNLTTDNANILLQIDNARLAADDFRLKYENEVALRQSVEADINGLRRVLDELTLTKADLEMQIESLTEELAYLKKNHEEEMKDLRNVSTGDVNVEMNAAPGVDLTQLLNNMRSQYEQLAEQNRKDAEAWFNEKSKELTTEIDNNIEQISSYKSEITELRRNVQALEIELQSQLALKQSLEASLAETEGR…	1068	4606	1	1	0	516.303	1030.59	2	1030.59	-0.0004	0	62.55	3.6e-05	R	VLDELTLTK	A
6	1::sp|cRAP039|P13645|K1C10_HUMAN	Keratin, type I cytoskeletal 10 OS=Homo sapiens GN=KRT10 PE=1 SV=6	1874	59020	58	58	28	28	49.7	584	MSVRYSSSKHYSSSRSGGGGGGGGCGGGGGVSSLRISSSKGSLGGGFSSGGFSGGSFSRGSSGGGCFGGSSGGYGGLGGFGGGSFRGSYGSSSFGGSYGGIFGGGSFGGGSFGGGSFGGGGFGGGGFGGGFGGGFGGDGGLLSGNEKVTMQNLNDRLASYLDKVRALEESNYELEGKIKEWYEKHGNSHQGEPRDYSKYYKTIDDLKNQILNLTTDNANILLQIDNARLAADDFRLKYENEVALRQSVEADINGLRRVLDELTLTKADLEMQIESLTEELAYLKKNHEEEMKDLRNVSTGDVNVEMNAAPGVDLTQLLNNMRSQYEQLAEQNRKDAEAWFNEKSKELTTEIDNNIEQISSYKSEITELRRNVQALEIELQSQLALKQSLEASLAETEGR…	1291	2504	1	1	1	545.768	1089.52	2	1089.52	-0.0032	0	31.76	0.081	K	VTMQNLNDR	L
6	1::sp|cRAP039|P13645|K1C10_HUMAN	Keratin, type I cytoskeletal 10 OS=Homo sapiens GN=KRT10 PE=1 SV=6	1874	59020	58	58	28	28	49.7	584	MSVRYSSSKHYSSSRSGGGGGGGGCGGGGGVSSLRISSSKGSLGGGFSSGGFSGGSFSRGSSGGGCFGGSSGGYGGLGGFGGGSFRGSYGSSSFGGSYGGIFGGGSFGGGSFGGGSFGGGGFGGGGFGGGFGGGFGGDGGLLSGNEKVTMQNLNDRLASYLDKVRALEESNYELEGKIKEWYEKHGNSHQGEPRDYSKYYKTIDDLKNQILNLTTDNANILLQIDNARLAADDFRLKYENEVALRQSVEADINGLRRVLDELTLTKADLEMQIESLTEELAYLKKNHEEEMKDLRNVSTGDVNVEMNAAPGVDLTQLLNNMRSQYEQLAEQNRKDAEAWFNEKSKELTTEIDNNIEQISSYKSEITELRRNVQALEIELQSQLALKQSLEASLAETEGR…	1296	2738	1	1	1	546.26	1090.51	2	1090.51	-0.0021	0	57.5	0.00018	K	VTMQNLNDR	L
6	1::sp|cRAP039|P13645|K1C10_HUMAN	Keratin, type I cytoskeletal 10 OS=Homo sapiens GN=KRT10 PE=1 SV=6	1874	59020	58	58	28	28	49.7	584	MSVRYSSSKHYSSSRSGGGGGGGGCGGGGGVSSLRISSSKGSLGGGFSSGGFSGGSFSRGSSGGGCFGGSSGGYGGLGGFGGGSFRGSYGSSSFGGSYGGIFGGGSFGGGSFGGGSFGGGGFGGGGFGGGFGGGFGGDGGLLSGNEKVTMQNLNDRLASYLDKVRALEESNYELEGKIKEWYEKHGNSHQGEPRDYSKYYKTIDDLKNQILNLTTDNANILLQIDNARLAADDFRLKYENEVALRQSVEADINGLRRVLDELTLTKADLEMQIESLTEELAYLKKNHEEEMKDLRNVSTGDVNVEMNAAPGVDLTQLLNNMRSQYEQLAEQNRKDAEAWFNEKSKELTTEIDNNIEQISSYKSEITELRRNVQALEIELQSQLALKQSLEASLAETEGR…	1299	2627	1	1	1	546.264	1090.51	2	1090.51	0.0052	0	28.25	0.16	K	VTMQNLNDR	L
6	1::sp|cRAP039|P13645|K1C10_HUMAN	Keratin, type I cytoskeletal 10 OS=Homo sapiens GN=KRT10 PE=1 SV=6	1874	59020	58	58	28	28	49.7	584	MSVRYSSSKHYSSSRSGGGGGGGGCGGGGGVSSLRISSSKGSLGGGFSSGGFSGGSFSRGSSGGGCFGGSSGGYGGLGGFGGGSFRGSYGSSSFGGSYGGIFGGGSFGGGSFGGGSFGGGGFGGGGFGGGFGGGFGGDGGLLSGNEKVTMQNLNDRLASYLDKVRALEESNYELEGKIKEWYEKHGNSHQGEPRDYSKYYKTIDDLKNQILNLTTDNANILLQIDNARLAADDFRLKYENEVALRQSVEADINGLRRVLDELTLTKADLEMQIESLTEELAYLKKNHEEEMKDLRNVSTGDVNVEMNAAPGVDLTQLLNNMRSQYEQLAEQNRKDAEAWFNEKSKELTTEIDNNIEQISSYKSEITELRRNVQALEIELQSQLALKQSLEASLAETEGR…	1363	1392	1	1	1	553.766	1105.52	2	1105.52	-0.0014	0	60.4	9.9e-05	K	VTMQNLNDR	L
6	1::sp|cRAP039|P13645|K1C10_HUMAN	Keratin, type I cytoskeletal 10 OS=Homo sapiens GN=KRT10 PE=1 SV=6	1874	59020	58	58	28	28	49.7	584	MSVRYSSSKHYSSSRSGGGGGGGGCGGGGGVSSLRISSSKGSLGGGFSSGGFSGGSFSRGSSGGGCFGGSSGGYGGLGGFGGGSFRGSYGSSSFGGSYGGIFGGGSFGGGSFGGGSFGGGGFGGGGFGGGFGGGFGGDGGLLSGNEKVTMQNLNDRLASYLDKVRALEESNYELEGKIKEWYEKHGNSHQGEPRDYSKYYKTIDDLKNQILNLTTDNANILLQIDNARLAADDFRLKYENEVALRQSVEADINGLRRVLDELTLTKADLEMQIESLTEELAYLKKNHEEEMKDLRNVSTGDVNVEMNAAPGVDLTQLLNNMRSQYEQLAEQNRKDAEAWFNEKSKELTTEIDNNIEQISSYKSEITELRRNVQALEIELQSQLALKQSLEASLAETEGR…	1364	1223	1	1	1	553.766	1105.52	2	1105.52	-0.0008	0	54.89	0.00035	K	VTMQNLNDR	L
6	1::sp|cRAP039|P13645|K1C10_HUMAN	Keratin, type I cytoskeletal 10 OS=Homo sapiens GN=KRT10 PE=1 SV=6	1874	59020	58	58	28	28	49.7	584	MSVRYSSSKHYSSSRSGGGGGGGGCGGGGGVSSLRISSSKGSLGGGFSSGGFSGGSFSRGSSGGGCFGGSSGGYGGLGGFGGGSFRGSYGSSSFGGSYGGIFGGGSFGGGSFGGGSFGGGGFGGGGFGGGFGGGFGGDGGLLSGNEKVTMQNLNDRLASYLDKVRALEESNYELEGKIKEWYEKHGNSHQGEPRDYSKYYKTIDDLKNQILNLTTDNANILLQIDNARLAADDFRLKYENEVALRQSVEADINGLRRVLDELTLTKADLEMQIESLTEELAYLKKNHEEEMKDLRNVSTGDVNVEMNAAPGVDLTQLLNNMRSQYEQLAEQNRKDAEAWFNEKSKELTTEIDNNIEQISSYKSEITELRRNVQALEIELQSQLALKQSLEASLAETEGR…	1365	2427	1	1	1	553.767	1105.52	2	1105.52	0.0014	0	54.05	0.00043	K	VTMQNLNDR	L
6	1::sp|cRAP039|P13645|K1C10_HUMAN	Keratin, type I cytoskeletal 10 OS=Homo sapiens GN=KRT10 PE=1 SV=6	1874	59020	58	58	28	28	49.7	584	MSVRYSSSKHYSSSRSGGGGGGGGCGGGGGVSSLRISSSKGSLGGGFSSGGFSGGSFSRGSSGGGCFGGSSGGYGGLGGFGGGSFRGSYGSSSFGGSYGGIFGGGSFGGGSFGGGSFGGGGFGGGGFGGGFGGGFGGDGGLLSGNEKVTMQNLNDRLASYLDKVRALEESNYELEGKIKEWYEKHGNSHQGEPRDYSKYYKTIDDLKNQILNLTTDNANILLQIDNARLAADDFRLKYENEVALRQSVEADINGLRRVLDELTLTKADLEMQIESLTEELAYLKKNHEEEMKDLRNVSTGDVNVEMNAAPGVDLTQLLNNMRSQYEQLAEQNRKDAEAWFNEKSKELTTEIDNNIEQISSYKSEITELRRNVQALEIELQSQLALKQSLEASLAETEGR…	1373	4972	1	1	0	555.249	1108.48	2	1108.48	0	0	40.17	0.0059	K	DAEAWFNEK	S
6	1::sp|cRAP039|P13645|K1C10_HUMAN	Keratin, type I cytoskeletal 10 OS=Homo sapiens GN=KRT10 PE=1 SV=6	1874	59020	58	58	28	28	49.7	584	MSVRYSSSKHYSSSRSGGGGGGGGCGGGGGVSSLRISSSKGSLGGGFSSGGFSGGSFSRGSSGGGCFGGSSGGYGGLGGFGGGSFRGSYGSSSFGGSYGGIFGGGSFGGGSFGGGSFGGGGFGGGGFGGGFGGGFGGDGGLLSGNEKVTMQNLNDRLASYLDKVRALEESNYELEGKIKEWYEKHGNSHQGEPRDYSKYYKTIDDLKNQILNLTTDNANILLQIDNARLAADDFRLKYENEVALRQSVEADINGLRRVLDELTLTKADLEMQIESLTEELAYLKKNHEEEMKDLRNVSTGDVNVEMNAAPGVDLTQLLNNMRSQYEQLAEQNRKDAEAWFNEKSKELTTEIDNNIEQISSYKSEITELRRNVQALEIELQSQLALKQSLEASLAETEGR…	1655	2842	1	1	1	583.296	1164.58	2	1164.58	-0.0003	0	70.65	9.6e-06	R	LENEIQTYR	S
6	1::sp|cRAP039|P13645|K1C10_HUMAN	Keratin, type I cytoskeletal 10 OS=Homo sapiens GN=KRT10 PE=1 SV=6	1874	59020	58	58	28	28	49.7	584	MSVRYSSSKHYSSSRSGGGGGGGGCGGGGGVSSLRISSSKGSLGGGFSSGGFSGGSFSRGSSGGGCFGGSSGGYGGLGGFGGGSFRGSYGSSSFGGSYGGIFGGGSFGGGSFGGGSFGGGGFGGGGFGGGFGGGFGGDGGLLSGNEKVTMQNLNDRLASYLDKVRALEESNYELEGKIKEWYEKHGNSHQGEPRDYSKYYKTIDDLKNQILNLTTDNANILLQIDNARLAADDFRLKYENEVALRQSVEADINGLRRVLDELTLTKADLEMQIESLTEELAYLKKNHEEEMKDLRNVSTGDVNVEMNAAPGVDLTQLLNNMRSQYEQLAEQNRKDAEAWFNEKSKELTTEIDNNIEQISSYKSEITELRRNVQALEIELQSQLALKQSLEASLAETEGR…	1656	3013	2	1	1	583.299	1164.58	2	1164.58	0.0064	0	24.11	0.41	R	LENEIQTYR	S
6	1::sp|cRAP039|P13645|K1C10_HUMAN	Keratin, type I cytoskeletal 10 OS=Homo sapiens GN=KRT10 PE=1 SV=6	1874	59020	58	58	28	28	49.7	584	MSVRYSSSKHYSSSRSGGGGGGGGCGGGGGVSSLRISSSKGSLGGGFSSGGFSGGSFSRGSSGGGCFGGSSGGYGGLGGFGGGSFRGSYGSSSFGGSYGGIFGGGSFGGGSFGGGSFGGGGFGGGGFGGGFGGGFGGDGGLLSGNEKVTMQNLNDRLASYLDKVRALEESNYELEGKIKEWYEKHGNSHQGEPRDYSKYYKTIDDLKNQILNLTTDNANILLQIDNARLAADDFRLKYENEVALRQSVEADINGLRRVLDELTLTKADLEMQIESLTEELAYLKKNHEEEMKDLRNVSTGDVNVEMNAAPGVDLTQLLNNMRSQYEQLAEQNRKDAEAWFNEKSKELTTEIDNNIEQISSYKSEITELRRNVQALEIELQSQLALKQSLEASLAETEGR…	1792	3800	1	1	0	601.315	1200.62	2	1200.61	0.0065	0	84.54	4e-07	R	QSVEADINGLR	R
6	1::sp|cRAP039|P13645|K1C10_HUMAN	Keratin, type I cytoskeletal 10 OS=Homo sapiens GN=KRT10 PE=1 SV=6	1874	59020	58	58	28	28	49.7	584	MSVRYSSSKHYSSSRSGGGGGGGGCGGGGGVSSLRISSSKGSLGGGFSSGGFSGGSFSRGSSGGGCFGGSSGGYGGLGGFGGGSFRGSYGSSSFGGSYGGIFGGGSFGGGSFGGGSFGGGGFGGGGFGGGFGGGFGGDGGLLSGNEKVTMQNLNDRLASYLDKVRALEESNYELEGKIKEWYEKHGNSHQGEPRDYSKYYKTIDDLKNQILNLTTDNANILLQIDNARLAADDFRLKYENEVALRQSVEADINGLRRVLDELTLTKADLEMQIESLTEELAYLKKNHEEEMKDLRNVSTGDVNVEMNAAPGVDLTQLLNNMRSQYEQLAEQNRKDAEAWFNEKSKELTTEIDNNIEQISSYKSEITELRRNVQALEIELQSQLALKQSLEASLAETEGR…	1798	4125	1	1	0	601.804	1201.59	2	1201.59	-0.0005	0	84.6	3.8e-07	R	QSVEADINGLR	R
6	1::sp|cRAP039|P13645|K1C10_HUMAN	Keratin, type I cytoskeletal 10 OS=Homo sapiens GN=KRT10 PE=1 SV=6	1874	59020	58	58	28	28	49.7	584	MSVRYSSSKHYSSSRSGGGGGGGGCGGGGGVSSLRISSSKGSLGGGFSSGGFSGGSFSRGSSGGGCFGGSSGGYGGLGGFGGGSFRGSYGSSSFGGSYGGIFGGGSFGGGSFGGGSFGGGGFGGGGFGGGFGGGFGGDGGLLSGNEKVTMQNLNDRLASYLDKVRALEESNYELEGKIKEWYEKHGNSHQGEPRDYSKYYKTIDDLKNQILNLTTDNANILLQIDNARLAADDFRLKYENEVALRQSVEADINGLRRVLDELTLTKADLEMQIESLTEELAYLKKNHEEEMKDLRNVSTGDVNVEMNAAPGVDLTQLLNNMRSQYEQLAEQNRKDAEAWFNEKSKELTTEIDNNIEQISSYKSEITELRRNVQALEIELQSQLALKQSLEASLAETEGR…	1799	3402	1	1	0	601.804	1201.59	2	1201.59	-0.0002	0	88.29	1.6e-07	R	QSVEADINGLR	R
6	1::sp|cRAP039|P13645|K1C10_HUMAN	Keratin, type I cytoskeletal 10 OS=Homo sapiens GN=KRT10 PE=1 SV=6	1874	59020	58	58	28	28	49.7	584	MSVRYSSSKHYSSSRSGGGGGGGGCGGGGGVSSLRISSSKGSLGGGFSSGGFSGGSFSRGSSGGGCFGGSSGGYGGLGGFGGGSFRGSYGSSSFGGSYGGIFGGGSFGGGSFGGGSFGGGGFGGGGFGGGFGGGFGGDGGLLSGNEKVTMQNLNDRLASYLDKVRALEESNYELEGKIKEWYEKHGNSHQGEPRDYSKYYKTIDDLKNQILNLTTDNANILLQIDNARLAADDFRLKYENEVALRQSVEADINGLRRVLDELTLTKADLEMQIESLTEELAYLKKNHEEEMKDLRNVSTGDVNVEMNAAPGVDLTQLLNNMRSQYEQLAEQNRKDAEAWFNEKSKELTTEIDNNIEQISSYKSEITELRRNVQALEIELQSQLALKQSLEASLAETEGR…	1942	3082	1	1	0	617.842	1233.67	2	1233.67	-0.0019	1	30.99	0.064	R	LKYENEVALR	Q
6	1::sp|cRAP039|P13645|K1C10_HUMAN	Keratin, type I cytoskeletal 10 OS=Homo sapiens GN=KRT10 PE=1 SV=6	1874	59020	58	58	28	28	49.7	584	MSVRYSSSKHYSSSRSGGGGGGGGCGGGGGVSSLRISSSKGSLGGGFSSGGFSGGSFSRGSSGGGCFGGSSGGYGGLGGFGGGSFRGSYGSSSFGGSYGGIFGGGSFGGGSFGGGSFGGGGFGGGGFGGGFGGGFGGDGGLLSGNEKVTMQNLNDRLASYLDKVRALEESNYELEGKIKEWYEKHGNSHQGEPRDYSKYYKTIDDLKNQILNLTTDNANILLQIDNARLAADDFRLKYENEVALRQSVEADINGLRRVLDELTLTKADLEMQIESLTEELAYLKKNHEEEMKDLRNVSTGDVNVEMNAAPGVDLTQLLNNMRSQYEQLAEQNRKDAEAWFNEKSKELTTEIDNNIEQISSYKSEITELRRNVQALEIELQSQLALKQSLEASLAETEGR…	1943	3081	1	1	0	412.231	1233.67	3	1233.67	-0.0013	1	73.46	3.6e-06	R	LKYENEVALR	Q
6	1::sp|cRAP039|P13645|K1C10_HUMAN	Keratin, type I cytoskeletal 10 OS=Homo sapiens GN=KRT10 PE=1 SV=6	1874	59020	58	58	28	28	49.7	584	MSVRYSSSKHYSSSRSGGGGGGGGCGGGGGVSSLRISSSKGSLGGGFSSGGFSGGSFSRGSSGGGCFGGSSGGYGGLGGFGGGSFRGSYGSSSFGGSYGGIFGGGSFGGGSFGGGSFGGGGFGGGGFGGGFGGGFGGDGGLLSGNEKVTMQNLNDRLASYLDKVRALEESNYELEGKIKEWYEKHGNSHQGEPRDYSKYYKTIDDLKNQILNLTTDNANILLQIDNARLAADDFRLKYENEVALRQSVEADINGLRRVLDELTLTKADLEMQIESLTEELAYLKKNHEEEMKDLRNVSTGDVNVEMNAAPGVDLTQLLNNMRSQYEQLAEQNRKDAEAWFNEKSKELTTEIDNNIEQISSYKSEITELRRNVQALEIELQSQLALKQSLEASLAETEGR…	1944	2947	1	1	0	412.231	1233.67	3	1233.67	-0.0006	1	62.55	4.4e-05	R	LKYENEVALR	Q
6	1::sp|cRAP039|P13645|K1C10_HUMAN	Keratin, type I cytoskeletal 10 OS=Homo sapiens GN=KRT10 PE=1 SV=6	1874	59020	58	58	28	28	49.7	584	MSVRYSSSKHYSSSRSGGGGGGGGCGGGGGVSSLRISSSKGSLGGGFSSGGFSGGSFSRGSSGGGCFGGSSGGYGGLGGFGGGSFRGSYGSSSFGGSYGGIFGGGSFGGGSFGGGSFGGGGFGGGGFGGGFGGGFGGDGGLLSGNEKVTMQNLNDRLASYLDKVRALEESNYELEGKIKEWYEKHGNSHQGEPRDYSKYYKTIDDLKNQILNLTTDNANILLQIDNARLAADDFRLKYENEVALRQSVEADINGLRRVLDELTLTKADLEMQIESLTEELAYLKKNHEEEMKDLRNVSTGDVNVEMNAAPGVDLTQLLNNMRSQYEQLAEQNRKDAEAWFNEKSKELTTEIDNNIEQISSYKSEITELRRNVQALEIELQSQLALKQSLEASLAETEGR…	1945	2952	1	1	0	617.843	1233.67	2	1233.67	-0.0004	1	57.87	0.00012	R	LKYENEVALR	Q
6	1::sp|cRAP039|P13645|K1C10_HUMAN	Keratin, type I cytoskeletal 10 OS=Homo sapiens GN=KRT10 PE=1 SV=6	1874	59020	58	58	28	28	49.7	584	MSVRYSSSKHYSSSRSGGGGGGGGCGGGGGVSSLRISSSKGSLGGGFSSGGFSGGSFSRGSSGGGCFGGSSGGYGGLGGFGGGSFRGSYGSSSFGGSYGGIFGGGSFGGGSFGGGSFGGGGFGGGGFGGGFGGGFGGDGGLLSGNEKVTMQNLNDRLASYLDKVRALEESNYELEGKIKEWYEKHGNSHQGEPRDYSKYYKTIDDLKNQILNLTTDNANILLQIDNARLAADDFRLKYENEVALRQSVEADINGLRRVLDELTLTKADLEMQIESLTEELAYLKKNHEEEMKDLRNVSTGDVNVEMNAAPGVDLTQLLNNMRSQYEQLAEQNRKDAEAWFNEKSKELTTEIDNNIEQISSYKSEITELRRNVQALEIELQSQLALKQSLEASLAETEGR…	2058	2695	1	1	1	631.802	1261.59	2	1261.59	-0.0013	0	51.08	0.00076	R	SLLEGEGSSGGGGR	G
6	1::sp|cRAP039|P13645|K1C10_HUMAN	Keratin, type I cytoskeletal 10 OS=Homo sapiens GN=KRT10 PE=1 SV=6	1874	59020	58	58	28	28	49.7	584	MSVRYSSSKHYSSSRSGGGGGGGGCGGGGGVSSLRISSSKGSLGGGFSSGGFSGGSFSRGSSGGGCFGGSSGGYGGLGGFGGGSFRGSYGSSSFGGSYGGIFGGGSFGGGSFGGGSFGGGGFGGGGFGGGFGGGFGGDGGLLSGNEKVTMQNLNDRLASYLDKVRALEESNYELEGKIKEWYEKHGNSHQGEPRDYSKYYKTIDDLKNQILNLTTDNANILLQIDNARLAADDFRLKYENEVALRQSVEADINGLRRVLDELTLTKADLEMQIESLTEELAYLKKNHEEEMKDLRNVSTGDVNVEMNAAPGVDLTQLLNNMRSQYEQLAEQNRKDAEAWFNEKSKELTTEIDNNIEQISSYKSEITELRRNVQALEIELQSQLALKQSLEASLAETEGR…	2059	2563	1	1	1	631.802	1261.59	2	1261.59	-0.0007	0	66.45	2.2e-05	R	SLLEGEGSSGGGGR	G
6	1::sp|cRAP039|P13645|K1C10_HUMAN	Keratin, type I cytoskeletal 10 OS=Homo sapiens GN=KRT10 PE=1 SV=6	1874	59020	58	58	28	28	49.7	584	MSVRYSSSKHYSSSRSGGGGGGGGCGGGGGVSSLRISSSKGSLGGGFSSGGFSGGSFSRGSSGGGCFGGSSGGYGGLGGFGGGSFRGSYGSSSFGGSYGGIFGGGSFGGGSFGGGSFGGGGFGGGGFGGGFGGGFGGDGGLLSGNEKVTMQNLNDRLASYLDKVRALEESNYELEGKIKEWYEKHGNSHQGEPRDYSKYYKTIDDLKNQILNLTTDNANILLQIDNARLAADDFRLKYENEVALRQSVEADINGLRRVLDELTLTKADLEMQIESLTEELAYLKKNHEEEMKDLRNVSTGDVNVEMNAAPGVDLTQLLNNMRSQYEQLAEQNRKDAEAWFNEKSKELTTEIDNNIEQISSYKSEITELRRNVQALEIELQSQLALKQSLEASLAETEGR…	2537	3087	1	1	0	453.244	1356.71	3	1356.71	-0.0008	1	33.87	0.047	R	QSVEADINGLRR	V
6	1::sp|cRAP039|P13645|K1C10_HUMAN	Keratin, type I cytoskeletal 10 OS=Homo sapiens GN=KRT10 PE=1 SV=6	1874	59020	58	58	28	28	49.7	584	MSVRYSSSKHYSSSRSGGGGGGGGCGGGGGVSSLRISSSKGSLGGGFSSGGFSGGSFSRGSSGGGCFGGSSGGYGGLGGFGGGSFRGSYGSSSFGGSYGGIFGGGSFGGGSFGGGSFGGGGFGGGGFGGGFGGGFGGDGGLLSGNEKVTMQNLNDRLASYLDKVRALEESNYELEGKIKEWYEKHGNSHQGEPRDYSKYYKTIDDLKNQILNLTTDNANILLQIDNARLAADDFRLKYENEVALRQSVEADINGLRRVLDELTLTKADLEMQIESLTEELAYLKKNHEEEMKDLRNVSTGDVNVEMNAAPGVDLTQLLNNMRSQYEQLAEQNRKDAEAWFNEKSKELTTEIDNNIEQISSYKSEITELRRNVQALEIELQSQLALKQSLEASLAETEGR…	2542	2650	1	1	0	453.572	1357.69	3	1357.69	-0.0024	1	40.4	0.011	R	QSVEADINGLRR	V
6	1::sp|cRAP039|P13645|K1C10_HUMAN	Keratin, type I cytoskeletal 10 OS=Homo sapiens GN=KRT10 PE=1 SV=6	1874	59020	58	58	28	28	49.7	584	MSVRYSSSKHYSSSRSGGGGGGGGCGGGGGVSSLRISSSKGSLGGGFSSGGFSGGSFSRGSSGGGCFGGSSGGYGGLGGFGGGSFRGSYGSSSFGGSYGGIFGGGSFGGGSFGGGSFGGGGFGGGGFGGGFGGGFGGDGGLLSGNEKVTMQNLNDRLASYLDKVRALEESNYELEGKIKEWYEKHGNSHQGEPRDYSKYYKTIDDLKNQILNLTTDNANILLQIDNARLAADDFRLKYENEVALRQSVEADINGLRRVLDELTLTKADLEMQIESLTEELAYLKKNHEEEMKDLRNVSTGDVNVEMNAAPGVDLTQLLNNMRSQYEQLAEQNRKDAEAWFNEKSKELTTEIDNNIEQISSYKSEITELRRNVQALEIELQSQLALKQSLEASLAETEGR…	2543	2655	1	1	0	679.855	1357.69	2	1357.69	0.0001	1	35.05	0.043	R	QSVEADINGLRR	V
6	1::sp|cRAP039|P13645|K1C10_HUMAN	Keratin, type I cytoskeletal 10 OS=Homo sapiens GN=KRT10 PE=1 SV=6	1874	59020	58	58	28	28	49.7	584	MSVRYSSSKHYSSSRSGGGGGGGGCGGGGGVSSLRISSSKGSLGGGFSSGGFSGGSFSRGSSGGGCFGGSSGGYGGLGGFGGGSFRGSYGSSSFGGSYGGIFGGGSFGGGSFGGGSFGGGGFGGGGFGGGFGGGFGGDGGLLSGNEKVTMQNLNDRLASYLDKVRALEESNYELEGKIKEWYEKHGNSHQGEPRDYSKYYKTIDDLKNQILNLTTDNANILLQIDNARLAADDFRLKYENEVALRQSVEADINGLRRVLDELTLTKADLEMQIESLTEELAYLKKNHEEEMKDLRNVSTGDVNVEMNAAPGVDLTQLLNNMRSQYEQLAEQNRKDAEAWFNEKSKELTTEIDNNIEQISSYKSEITELRRNVQALEIELQSQLALKQSLEASLAETEGR…	2548	3307	1	1	0	453.907	1358.7	3	1358.68	0.0193	1	38.03	0.023	R	QSVEADINGLRR	V
6	1::sp|cRAP039|P13645|K1C10_HUMAN	Keratin, type I cytoskeletal 10 OS=Homo sapiens GN=KRT10 PE=1 SV=6	1874	59020	58	58	28	28	49.7	584	MSVRYSSSKHYSSSRSGGGGGGGGCGGGGGVSSLRISSSKGSLGGGFSSGGFSGGSFSRGSSGGGCFGGSSGGYGGLGGFGGGSFRGSYGSSSFGGSYGGIFGGGSFGGGSFGGGSFGGGGFGGGGFGGGFGGGFGGDGGLLSGNEKVTMQNLNDRLASYLDKVRALEESNYELEGKIKEWYEKHGNSHQGEPRDYSKYYKTIDDLKNQILNLTTDNANILLQIDNARLAADDFRLKYENEVALRQSVEADINGLRRVLDELTLTKADLEMQIESLTEELAYLKKNHEEEMKDLRNVSTGDVNVEMNAAPGVDLTQLLNNMRSQYEQLAEQNRKDAEAWFNEKSKELTTEIDNNIEQISSYKSEITELRRNVQALEIELQSQLALKQSLEASLAETEGR…	2594	2486	1	1	1	455.884	1364.63	3	1364.63	-0.0016	0	47.89	0.0018	R	SQYEQLAEQNR	K
6	1::sp|cRAP039|P13645|K1C10_HUMAN	Keratin, type I cytoskeletal 10 OS=Homo sapiens GN=KRT10 PE=1 SV=6	1874	59020	58	58	28	28	49.7	584	MSVRYSSSKHYSSSRSGGGGGGGGCGGGGGVSSLRISSSKGSLGGGFSSGGFSGGSFSRGSSGGGCFGGSSGGYGGLGGFGGGSFRGSYGSSSFGGSYGGIFGGGSFGGGSFGGGSFGGGGFGGGGFGGGFGGGFGGDGGLLSGNEKVTMQNLNDRLASYLDKVRALEESNYELEGKIKEWYEKHGNSHQGEPRDYSKYYKTIDDLKNQILNLTTDNANILLQIDNARLAADDFRLKYENEVALRQSVEADINGLRRVLDELTLTKADLEMQIESLTEELAYLKKNHEEEMKDLRNVSTGDVNVEMNAAPGVDLTQLLNNMRSQYEQLAEQNRKDAEAWFNEKSKELTTEIDNNIEQISSYKSEITELRRNVQALEIELQSQLALKQSLEASLAETEGR…	2595	2458	1	1	1	683.323	1364.63	2	1364.63	-0.0014	0	66.91	2.3e-05	R	SQYEQLAEQNR	K
6	1::sp|cRAP039|P13645|K1C10_HUMAN	Keratin, type I cytoskeletal 10 OS=Homo sapiens GN=KRT10 PE=1 SV=6	1874	59020	58	58	28	28	49.7	584	MSVRYSSSKHYSSSRSGGGGGGGGCGGGGGVSSLRISSSKGSLGGGFSSGGFSGGSFSRGSSGGGCFGGSSGGYGGLGGFGGGSFRGSYGSSSFGGSYGGIFGGGSFGGGSFGGGSFGGGGFGGGGFGGGFGGGFGGDGGLLSGNEKVTMQNLNDRLASYLDKVRALEESNYELEGKIKEWYEKHGNSHQGEPRDYSKYYKTIDDLKNQILNLTTDNANILLQIDNARLAADDFRLKYENEVALRQSVEADINGLRRVLDELTLTKADLEMQIESLTEELAYLKKNHEEEMKDLRNVSTGDVNVEMNAAPGVDLTQLLNNMRSQYEQLAEQNRKDAEAWFNEKSKELTTEIDNNIEQISSYKSEITELRRNVQALEIELQSQLALKQSLEASLAETEGR…	2688	3199	1	1	1	691.327	1380.64	2	1380.64	-0.0015	0	81.11	7.7e-07	R	ALEESNYELEGK	I
6	1::sp|cRAP039|P13645|K1C10_HUMAN	Keratin, type I cytoskeletal 10 OS=Homo sapiens GN=KRT10 PE=1 SV=6	1874	59020	58	58	28	28	49.7	584	MSVRYSSSKHYSSSRSGGGGGGGGCGGGGGVSSLRISSSKGSLGGGFSSGGFSGGSFSRGSSGGGCFGGSSGGYGGLGGFGGGSFRGSYGSSSFGGSYGGIFGGGSFGGGSFGGGSFGGGGFGGGGFGGGFGGGFGGDGGLLSGNEKVTMQNLNDRLASYLDKVRALEESNYELEGKIKEWYEKHGNSHQGEPRDYSKYYKTIDDLKNQILNLTTDNANILLQIDNARLAADDFRLKYENEVALRQSVEADINGLRRVLDELTLTKADLEMQIESLTEELAYLKKNHEEEMKDLRNVSTGDVNVEMNAAPGVDLTQLLNNMRSQYEQLAEQNRKDAEAWFNEKSKELTTEIDNNIEQISSYKSEITELRRNVQALEIELQSQLALKQSLEASLAETEGR…	2723	3963	1	1	1	695.844	1389.67	2	1389.67	-0.001	0	91.62	9.7e-08	K	QSLEASLAETEGR	Y
6	1::sp|cRAP039|P13645|K1C10_HUMAN	Keratin, type I cytoskeletal 10 OS=Homo sapiens GN=KRT10 PE=1 SV=6	1874	59020	58	58	28	28	49.7	584	MSVRYSSSKHYSSSRSGGGGGGGGCGGGGGVSSLRISSSKGSLGGGFSSGGFSGGSFSRGSSGGGCFGGSSGGYGGLGGFGGGSFRGSYGSSSFGGSYGGIFGGGSFGGGSFGGGSFGGGGFGGGGFGGGFGGGFGGDGGLLSGNEKVTMQNLNDRLASYLDKVRALEESNYELEGKIKEWYEKHGNSHQGEPRDYSKYYKTIDDLKNQILNLTTDNANILLQIDNARLAADDFRLKYENEVALRQSVEADINGLRRVLDELTLTKADLEMQIESLTEELAYLKKNHEEEMKDLRNVSTGDVNVEMNAAPGVDLTQLLNNMRSQYEQLAEQNRKDAEAWFNEKSKELTTEIDNNIEQISSYKSEITELRRNVQALEIELQSQLALKQSLEASLAETEGR…	2724	4120	1	1	1	695.845	1389.68	2	1389.67	0.0017	0	38.74	0.019	K	QSLEASLAETEGR	Y
6	1::sp|cRAP039|P13645|K1C10_HUMAN	Keratin, type I cytoskeletal 10 OS=Homo sapiens GN=KRT10 PE=1 SV=6	1874	59020	58	58	28	28	49.7	584	MSVRYSSSKHYSSSRSGGGGGGGGCGGGGGVSSLRISSSKGSLGGGFSSGGFSGGSFSRGSSGGGCFGGSSGGYGGLGGFGGGSFRGSYGSSSFGGSYGGIFGGGSFGGGSFGGGSFGGGGFGGGGFGGGFGGGFGGDGGLLSGNEKVTMQNLNDRLASYLDKVRALEESNYELEGKIKEWYEKHGNSHQGEPRDYSKYYKTIDDLKNQILNLTTDNANILLQIDNARLAADDFRLKYENEVALRQSVEADINGLRRVLDELTLTKADLEMQIESLTEELAYLKKNHEEEMKDLRNVSTGDVNVEMNAAPGVDLTQLLNNMRSQYEQLAEQNRKDAEAWFNEKSKELTTEIDNNIEQISSYKSEITELRRNVQALEIELQSQLALKQSLEASLAETEGR…	2968	3586	1	1	1	478.928	1433.76	3	1433.76	0	1	35.17	0.03	K	IRLENEIQTYR	S
6	1::sp|cRAP039|P13645|K1C10_HUMAN	Keratin, type I cytoskeletal 10 OS=Homo sapiens GN=KRT10 PE=1 SV=6	1874	59020	58	58	28	28	49.7	584	MSVRYSSSKHYSSSRSGGGGGGGGCGGGGGVSSLRISSSKGSLGGGFSSGGFSGGSFSRGSSGGGCFGGSSGGYGGLGGFGGGSFRGSYGSSSFGGSYGGIFGGGSFGGGSFGGGSFGGGGFGGGGFGGGFGGGFGGDGGLLSGNEKVTMQNLNDRLASYLDKVRALEESNYELEGKIKEWYEKHGNSHQGEPRDYSKYYKTIDDLKNQILNLTTDNANILLQIDNARLAADDFRLKYENEVALRQSVEADINGLRRVLDELTLTKADLEMQIESLTEELAYLKKNHEEEMKDLRNVSTGDVNVEMNAAPGVDLTQLLNNMRSQYEQLAEQNRKDAEAWFNEKSKELTTEIDNNIEQISSYKSEITELRRNVQALEIELQSQLALKQSLEASLAETEGR…	2970	3577	1	1	1	717.889	1433.76	2	1433.76	0.0014	1	47.48	0.0018	K	IRLENEIQTYR	S
6	1::sp|cRAP039|P13645|K1C10_HUMAN	Keratin, type I cytoskeletal 10 OS=Homo sapiens GN=KRT10 PE=1 SV=6	1874	59020	58	58	28	28	49.7	584	MSVRYSSSKHYSSSRSGGGGGGGGCGGGGGVSSLRISSSKGSLGGGFSSGGFSGGSFSRGSSGGGCFGGSSGGYGGLGGFGGGSFRGSYGSSSFGGSYGGIFGGGSFGGGSFGGGSFGGGGFGGGGFGGGFGGGFGGDGGLLSGNEKVTMQNLNDRLASYLDKVRALEESNYELEGKIKEWYEKHGNSHQGEPRDYSKYYKTIDDLKNQILNLTTDNANILLQIDNARLAADDFRLKYENEVALRQSVEADINGLRRVLDELTLTKADLEMQIESLTEELAYLKKNHEEEMKDLRNVSTGDVNVEMNAAPGVDLTQLLNNMRSQYEQLAEQNRKDAEAWFNEKSKELTTEIDNNIEQISSYKSEITELRRNVQALEIELQSQLALKQSLEASLAETEGR…	3265	1777	1	1	1	498.583	1492.73	3	1492.73	-0.001	1	38.67	0.019	R	SQYEQLAEQNRK	D
6	1::sp|cRAP039|P13645|K1C10_HUMAN	Keratin, type I cytoskeletal 10 OS=Homo sapiens GN=KRT10 PE=1 SV=6	1874	59020	58	58	28	28	49.7	584	MSVRYSSSKHYSSSRSGGGGGGGGCGGGGGVSSLRISSSKGSLGGGFSSGGFSGGSFSRGSSGGGCFGGSSGGYGGLGGFGGGSFRGSYGSSSFGGSYGGIFGGGSFGGGSFGGGSFGGGGFGGGGFGGGFGGGFGGDGGLLSGNEKVTMQNLNDRLASYLDKVRALEESNYELEGKIKEWYEKHGNSHQGEPRDYSKYYKTIDDLKNQILNLTTDNANILLQIDNARLAADDFRLKYENEVALRQSVEADINGLRRVLDELTLTKADLEMQIESLTEELAYLKKNHEEEMKDLRNVSTGDVNVEMNAAPGVDLTQLLNNMRSQYEQLAEQNRKDAEAWFNEKSKELTTEIDNNIEQISSYKSEITELRRNVQALEIELQSQLALKQSLEASLAETEGR…	3266	1778	1	1	1	747.371	1492.73	2	1492.73	0.001	1	65.62	3.9e-05	R	SQYEQLAEQNRK	D
6	1::sp|cRAP039|P13645|K1C10_HUMAN	Keratin, type I cytoskeletal 10 OS=Homo sapiens GN=KRT10 PE=1 SV=6	1874	59020	58	58	28	28	49.7	584	MSVRYSSSKHYSSSRSGGGGGGGGCGGGGGVSSLRISSSKGSLGGGFSSGGFSGGSFSRGSSGGGCFGGSSGGYGGLGGFGGGSFRGSYGSSSFGGSYGGIFGGGSFGGGSFGGGSFGGGGFGGGGFGGGFGGGFGGDGGLLSGNEKVTMQNLNDRLASYLDKVRALEESNYELEGKIKEWYEKHGNSHQGEPRDYSKYYKTIDDLKNQILNLTTDNANILLQIDNARLAADDFRLKYENEVALRQSVEADINGLRRVLDELTLTKADLEMQIESLTEELAYLKKNHEEEMKDLRNVSTGDVNVEMNAAPGVDLTQLLNNMRSQYEQLAEQNRKDAEAWFNEKSKELTTEIDNNIEQISSYKSEITELRRNVQALEIELQSQLALKQSLEASLAETEGR…	3276	1903	1	1	1	498.911	1493.71	3	1493.71	-0.0001	1	32.06	0.081	R	SQYEQLAEQNRK	D
6	1::sp|cRAP039|P13645|K1C10_HUMAN	Keratin, type I cytoskeletal 10 OS=Homo sapiens GN=KRT10 PE=1 SV=6	1874	59020	58	58	28	28	49.7	584	MSVRYSSSKHYSSSRSGGGGGGGGCGGGGGVSSLRISSSKGSLGGGFSSGGFSGGSFSRGSSGGGCFGGSSGGYGGLGGFGGGSFRGSYGSSSFGGSYGGIFGGGSFGGGSFGGGSFGGGGFGGGGFGGGFGGGFGGDGGLLSGNEKVTMQNLNDRLASYLDKVRALEESNYELEGKIKEWYEKHGNSHQGEPRDYSKYYKTIDDLKNQILNLTTDNANILLQIDNARLAADDFRLKYENEVALRQSVEADINGLRRVLDELTLTKADLEMQIESLTEELAYLKKNHEEEMKDLRNVSTGDVNVEMNAAPGVDLTQLLNNMRSQYEQLAEQNRKDAEAWFNEKSKELTTEIDNNIEQISSYKSEITELRRNVQALEIELQSQLALKQSLEASLAETEGR…	3601	2794	1	1	1	775.342	1548.67	2	1548.67	-0.0003	0	87.1	9.3e-08	R	SGGGGGGGGCGGGGGVSSLR	I
6	1::sp|cRAP039|P13645|K1C10_HUMAN	Keratin, type I cytoskeletal 10 OS=Homo sapiens GN=KRT10 PE=1 SV=6	1874	59020	58	58	28	28	49.7	584	MSVRYSSSKHYSSSRSGGGGGGGGCGGGGGVSSLRISSSKGSLGGGFSSGGFSGGSFSRGSSGGGCFGGSSGGYGGLGGFGGGSFRGSYGSSSFGGSYGGIFGGGSFGGGSFGGGSFGGGGFGGGGFGGGFGGGFGGDGGLLSGNEKVTMQNLNDRLASYLDKVRALEESNYELEGKIKEWYEKHGNSHQGEPRDYSKYYKTIDDLKNQILNLTTDNANILLQIDNARLAADDFRLKYENEVALRQSVEADINGLRRVLDELTLTKADLEMQIESLTEELAYLKKNHEEEMKDLRNVSTGDVNVEMNAAPGVDLTQLLNNMRSQYEQLAEQNRKDAEAWFNEKSKELTTEIDNNIEQISSYKSEITELRRNVQALEIELQSQLALKQSLEASLAETEGR…	4280	5042	1	1	1	854.387	1706.76	2	1706.76	-0.0046	0	56.27	0.00021	K	GSLGGGFSSGGFSGGSFSR	G
6	1::sp|cRAP039|P13645|K1C10_HUMAN	Keratin, type I cytoskeletal 10 OS=Homo sapiens GN=KRT10 PE=1 SV=6	1874	59020	58	58	28	28	49.7	584	MSVRYSSSKHYSSSRSGGGGGGGGCGGGGGVSSLRISSSKGSLGGGFSSGGFSGGSFSRGSSGGGCFGGSSGGYGGLGGFGGGSFRGSYGSSSFGGSYGGIFGGGSFGGGSFGGGSFGGGGFGGGGFGGGFGGGFGGDGGLLSGNEKVTMQNLNDRLASYLDKVRALEESNYELEGKIKEWYEKHGNSHQGEPRDYSKYYKTIDDLKNQILNLTTDNANILLQIDNARLAADDFRLKYENEVALRQSVEADINGLRRVLDELTLTKADLEMQIESLTEELAYLKKNHEEEMKDLRNVSTGDVNVEMNAAPGVDLTQLLNNMRSQYEQLAEQNRKDAEAWFNEKSKELTTEIDNNIEQISSYKSEITELRRNVQALEIELQSQLALKQSLEASLAETEGR…	4281	4922	1	1	1	854.389	1706.76	2	1706.76	-0.0008	0	125.61	2.8e-11	K	GSLGGGFSSGGFSGGSFSR	G
6	1::sp|cRAP039|P13645|K1C10_HUMAN	Keratin, type I cytoskeletal 10 OS=Homo sapiens GN=KRT10 PE=1 SV=6	1874	59020	58	58	28	28	49.7	584	MSVRYSSSKHYSSSRSGGGGGGGGCGGGGGVSSLRISSSKGSLGGGFSSGGFSGGSFSRGSSGGGCFGGSSGGYGGLGGFGGGSFRGSYGSSSFGGSYGGIFGGGSFGGGSFGGGSFGGGGFGGGGFGGGFGGGFGGDGGLLSGNEKVTMQNLNDRLASYLDKVRALEESNYELEGKIKEWYEKHGNSHQGEPRDYSKYYKTIDDLKNQILNLTTDNANILLQIDNARLAADDFRLKYENEVALRQSVEADINGLRRVLDELTLTKADLEMQIESLTEELAYLKKNHEEEMKDLRNVSTGDVNVEMNAAPGVDLTQLLNNMRSQYEQLAEQNRKDAEAWFNEKSKELTTEIDNNIEQISSYKSEITELRRNVQALEIELQSQLALKQSLEASLAETEGR…	4638	7150	1	1	1	899.008	1796	2	1796	-0.0023	0	71.39	3.5e-06	R	NVQALEIELQSQLALK	Q
6	1::sp|cRAP039|P13645|K1C10_HUMAN	Keratin, type I cytoskeletal 10 OS=Homo sapiens GN=KRT10 PE=1 SV=6	1874	59020	58	58	28	28	49.7	584	MSVRYSSSKHYSSSRSGGGGGGGGCGGGGGVSSLRISSSKGSLGGGFSSGGFSGGSFSRGSSGGGCFGGSSGGYGGLGGFGGGSFRGSYGSSSFGGSYGGIFGGGSFGGGSFGGGSFGGGGFGGGGFGGGFGGGFGGDGGLLSGNEKVTMQNLNDRLASYLDKVRALEESNYELEGKIKEWYEKHGNSHQGEPRDYSKYYKTIDDLKNQILNLTTDNANILLQIDNARLAADDFRLKYENEVALRQSVEADINGLRRVLDELTLTKADLEMQIESLTEELAYLKKNHEEEMKDLRNVSTGDVNVEMNAAPGVDLTQLLNNMRSQYEQLAEQNRKDAEAWFNEKSKELTTEIDNNIEQISSYKSEITELRRNVQALEIELQSQLALKQSLEASLAETEGR…	4639	6933	1	1	1	899.008	1796	2	1796	-0.002	0	80.26	4.5e-07	R	NVQALEIELQSQLALK	Q
6	1::sp|cRAP039|P13645|K1C10_HUMAN	Keratin, type I cytoskeletal 10 OS=Homo sapiens GN=KRT10 PE=1 SV=6	1874	59020	58	58	28	28	49.7	584	MSVRYSSSKHYSSSRSGGGGGGGGCGGGGGVSSLRISSSKGSLGGGFSSGGFSGGSFSRGSSGGGCFGGSSGGYGGLGGFGGGSFRGSYGSSSFGGSYGGIFGGGSFGGGSFGGGSFGGGGFGGGGFGGGFGGGFGGDGGLLSGNEKVTMQNLNDRLASYLDKVRALEESNYELEGKIKEWYEKHGNSHQGEPRDYSKYYKTIDDLKNQILNLTTDNANILLQIDNARLAADDFRLKYENEVALRQSVEADINGLRRVLDELTLTKADLEMQIESLTEELAYLKKNHEEEMKDLRNVSTGDVNVEMNAAPGVDLTQLLNNMRSQYEQLAEQNRKDAEAWFNEKSKELTTEIDNNIEQISSYKSEITELRRNVQALEIELQSQLALKQSLEASLAETEGR…	4640	7149	1	1	1	599.675	1796	3	1796	-0.0015	0	77.59	8.4e-07	R	NVQALEIELQSQLALK	Q
6	1::sp|cRAP039|P13645|K1C10_HUMAN	Keratin, type I cytoskeletal 10 OS=Homo sapiens GN=KRT10 PE=1 SV=6	1874	59020	58	58	28	28	49.7	584	MSVRYSSSKHYSSSRSGGGGGGGGCGGGGGVSSLRISSSKGSLGGGFSSGGFSGGSFSRGSSGGGCFGGSSGGYGGLGGFGGGSFRGSYGSSSFGGSYGGIFGGGSFGGGSFGGGSFGGGGFGGGGFGGGFGGGFGGDGGLLSGNEKVTMQNLNDRLASYLDKVRALEESNYELEGKIKEWYEKHGNSHQGEPRDYSKYYKTIDDLKNQILNLTTDNANILLQIDNARLAADDFRLKYENEVALRQSVEADINGLRRVLDELTLTKADLEMQIESLTEELAYLKKNHEEEMKDLRNVSTGDVNVEMNAAPGVDLTQLLNNMRSQYEQLAEQNRKDAEAWFNEKSKELTTEIDNNIEQISSYKSEITELRRNVQALEIELQSQLALKQSLEASLAETEGR…	4641	6932	1	1	1	599.675	1796	3	1796	-0.0001	0	66.93	9.1e-06	R	NVQALEIELQSQLALK	Q
6	1::sp|cRAP039|P13645|K1C10_HUMAN	Keratin, type I cytoskeletal 10 OS=Homo sapiens GN=KRT10 PE=1 SV=6	1874	59020	58	58	28	28	49.7	584	MSVRYSSSKHYSSSRSGGGGGGGGCGGGGGVSSLRISSSKGSLGGGFSSGGFSGGSFSRGSSGGGCFGGSSGGYGGLGGFGGGSFRGSYGSSSFGGSYGGIFGGGSFGGGSFGGGSFGGGGFGGGGFGGGFGGGFGGDGGLLSGNEKVTMQNLNDRLASYLDKVRALEESNYELEGKIKEWYEKHGNSHQGEPRDYSKYYKTIDDLKNQILNLTTDNANILLQIDNARLAADDFRLKYENEVALRQSVEADINGLRRVLDELTLTKADLEMQIESLTEELAYLKKNHEEEMKDLRNVSTGDVNVEMNAAPGVDLTQLLNNMRSQYEQLAEQNRKDAEAWFNEKSKELTTEIDNNIEQISSYKSEITELRRNVQALEIELQSQLALKQSLEASLAETEGR…	5276	5862	1	1	1	666.327	1995.96	3	1995.96	-0.0037	0	53.81	0.00066	K	ELTTEIDNNIEQISSYK	S
6	1::sp|cRAP039|P13645|K1C10_HUMAN	Keratin, type I cytoskeletal 10 OS=Homo sapiens GN=KRT10 PE=1 SV=6	1874	59020	58	58	28	28	49.7	584	MSVRYSSSKHYSSSRSGGGGGGGGCGGGGGVSSLRISSSKGSLGGGFSSGGFSGGSFSRGSSGGGCFGGSSGGYGGLGGFGGGSFRGSYGSSSFGGSYGGIFGGGSFGGGSFGGGSFGGGGFGGGGFGGGFGGGFGGDGGLLSGNEKVTMQNLNDRLASYLDKVRALEESNYELEGKIKEWYEKHGNSHQGEPRDYSKYYKTIDDLKNQILNLTTDNANILLQIDNARLAADDFRLKYENEVALRQSVEADINGLRRVLDELTLTKADLEMQIESLTEELAYLKKNHEEEMKDLRNVSTGDVNVEMNAAPGVDLTQLLNNMRSQYEQLAEQNRKDAEAWFNEKSKELTTEIDNNIEQISSYKSEITELRRNVQALEIELQSQLALKQSLEASLAETEGR…	5277	5857	1	1	1	998.988	1995.96	2	1995.96	-0.0018	0	93.58	7e-08	K	ELTTEIDNNIEQISSYK	S
6	1::sp|cRAP039|P13645|K1C10_HUMAN	Keratin, type I cytoskeletal 10 OS=Homo sapiens GN=KRT10 PE=1 SV=6	1874	59020	58	58	28	28	49.7	584	MSVRYSSSKHYSSSRSGGGGGGGGCGGGGGVSSLRISSSKGSLGGGFSSGGFSGGSFSRGSSGGGCFGGSSGGYGGLGGFGGGSFRGSYGSSSFGGSYGGIFGGGSFGGGSFGGGSFGGGGFGGGGFGGGFGGGFGGDGGLLSGNEKVTMQNLNDRLASYLDKVRALEESNYELEGKIKEWYEKHGNSHQGEPRDYSKYYKTIDDLKNQILNLTTDNANILLQIDNARLAADDFRLKYENEVALRQSVEADINGLRRVLDELTLTKADLEMQIESLTEELAYLKKNHEEEMKDLRNVSTGDVNVEMNAAPGVDLTQLLNNMRSQYEQLAEQNRKDAEAWFNEKSKELTTEIDNNIEQISSYKSEITELRRNVQALEIELQSQLALKQSLEASLAETEGR…	5284	5248	1	1	1	999.981	1997.95	2	1997.93	0.0153	0	91.7	9.4e-08	K	ELTTEIDNNIEQISSYK	S
6	1::sp|cRAP039|P13645|K1C10_HUMAN	Keratin, type I cytoskeletal 10 OS=Homo sapiens GN=KRT10 PE=1 SV=6	1874	59020	58	58	28	28	49.7	584	MSVRYSSSKHYSSSRSGGGGGGGGCGGGGGVSSLRISSSKGSLGGGFSSGGFSGGSFSRGSSGGGCFGGSSGGYGGLGGFGGGSFRGSYGSSSFGGSYGGIFGGGSFGGGSFGGGSFGGGGFGGGGFGGGFGGGFGGDGGLLSGNEKVTMQNLNDRLASYLDKVRALEESNYELEGKIKEWYEKHGNSHQGEPRDYSKYYKTIDDLKNQILNLTTDNANILLQIDNARLAADDFRLKYENEVALRQSVEADINGLRRVLDELTLTKADLEMQIESLTEELAYLKKNHEEEMKDLRNVSTGDVNVEMNAAPGVDLTQLLNNMRSQYEQLAEQNRKDAEAWFNEKSKELTTEIDNNIEQISSYKSEITELRRNVQALEIELQSQLALKQSLEASLAETEGR…	5518	5451	1	1	1	1041.99	2081.96	2	2081.96	-0.0006	0	158.33	1.9e-14	R	AETECQNTEYQQLLDIK	I
6	1::sp|cRAP039|P13645|K1C10_HUMAN	Keratin, type I cytoskeletal 10 OS=Homo sapiens GN=KRT10 PE=1 SV=6	1874	59020	58	58	28	28	49.7	584	MSVRYSSSKHYSSSRSGGGGGGGGCGGGGGVSSLRISSSKGSLGGGFSSGGFSGGSFSRGSSGGGCFGGSSGGYGGLGGFGGGSFRGSYGSSSFGGSYGGIFGGGSFGGGSFGGGSFGGGGFGGGGFGGGFGGGFGGDGGLLSGNEKVTMQNLNDRLASYLDKVRALEESNYELEGKIKEWYEKHGNSHQGEPRDYSKYYKTIDDLKNQILNLTTDNANILLQIDNARLAADDFRLKYENEVALRQSVEADINGLRRVLDELTLTKADLEMQIESLTEELAYLKKNHEEEMKDLRNVSTGDVNVEMNAAPGVDLTQLLNNMRSQYEQLAEQNRKDAEAWFNEKSKELTTEIDNNIEQISSYKSEITELRRNVQALEIELQSQLALKQSLEASLAETEGR…	5519	5456	1	1	1	694.994	2081.96	3	2081.96	0.0011	0	69.93	1.3e-05	R	AETECQNTEYQQLLDIK	I
6	1::sp|cRAP039|P13645|K1C10_HUMAN	Keratin, type I cytoskeletal 10 OS=Homo sapiens GN=KRT10 PE=1 SV=6	1874	59020	58	58	28	28	49.7	584	MSVRYSSSKHYSSSRSGGGGGGGGCGGGGGVSSLRISSSKGSLGGGFSSGGFSGGSFSRGSSGGGCFGGSSGGYGGLGGFGGGSFRGSYGSSSFGGSYGGIFGGGSFGGGSFGGGSFGGGGFGGGGFGGGFGGGFGGDGGLLSGNEKVTMQNLNDRLASYLDKVRALEESNYELEGKIKEWYEKHGNSHQGEPRDYSKYYKTIDDLKNQILNLTTDNANILLQIDNARLAADDFRLKYENEVALRQSVEADINGLRRVLDELTLTKADLEMQIESLTEELAYLKKNHEEEMKDLRNVSTGDVNVEMNAAPGVDLTQLLNNMRSQYEQLAEQNRKDAEAWFNEKSKELTTEIDNNIEQISSYKSEITELRRNVQALEIELQSQLALKQSLEASLAETEGR…	5671	5122	1	1	1	538.784	2151.11	4	2151.11	-0.0025	2	26.19	0.33	K	VTMQNLNDRLASYLDKVR	A
6	1::sp|cRAP039|P13645|K1C10_HUMAN	Keratin, type I cytoskeletal 10 OS=Homo sapiens GN=KRT10 PE=1 SV=6	1874	59020	58	58	28	28	49.7	584	MSVRYSSSKHYSSSRSGGGGGGGGCGGGGGVSSLRISSSKGSLGGGFSSGGFSGGSFSRGSSGGGCFGGSSGGYGGLGGFGGGSFRGSYGSSSFGGSYGGIFGGGSFGGGSFGGGSFGGGGFGGGGFGGGFGGGFGGDGGLLSGNEKVTMQNLNDRLASYLDKVRALEESNYELEGKIKEWYEKHGNSHQGEPRDYSKYYKTIDDLKNQILNLTTDNANILLQIDNARLAADDFRLKYENEVALRQSVEADINGLRRVLDELTLTKADLEMQIESLTEELAYLKKNHEEEMKDLRNVSTGDVNVEMNAAPGVDLTQLLNNMRSQYEQLAEQNRKDAEAWFNEKSKELTTEIDNNIEQISSYKSEITELRRNVQALEIELQSQLALKQSLEASLAETEGR…	5819	4253	1	1	1	737.353	2209.04	3	2209.04	-0.0024	1	57.63	0.00027	R	ISSSKGSLGGGFSSGGFSGGSFSR	G
6	1::sp|cRAP039|P13645|K1C10_HUMAN	Keratin, type I cytoskeletal 10 OS=Homo sapiens GN=KRT10 PE=1 SV=6	1874	59020	58	58	28	28	49.7	584	MSVRYSSSKHYSSSRSGGGGGGGGCGGGGGVSSLRISSSKGSLGGGFSSGGFSGGSFSRGSSGGGCFGGSSGGYGGLGGFGGGSFRGSYGSSSFGGSYGGIFGGGSFGGGSFGGGSFGGGGFGGGGFGGGFGGGFGGDGGLLSGNEKVTMQNLNDRLASYLDKVRALEESNYELEGKIKEWYEKHGNSHQGEPRDYSKYYKTIDDLKNQILNLTTDNANILLQIDNARLAADDFRLKYENEVALRQSVEADINGLRRVLDELTLTKADLEMQIESLTEELAYLKKNHEEEMKDLRNVSTGDVNVEMNAAPGVDLTQLLNNMRSQYEQLAEQNRKDAEAWFNEKSKELTTEIDNNIEQISSYKSEITELRRNVQALEIELQSQLALKQSLEASLAETEGR…	6291	5625	1	1	1	1172	2341.99	2	2341.98	0.0098	0	119.73	5.1e-11	R	GSSGGGCFGGSSGGYGGLGGFGGGSFR	G
6	1::sp|cRAP039|P13645|K1C10_HUMAN	Keratin, type I cytoskeletal 10 OS=Homo sapiens GN=KRT10 PE=1 SV=6	1874	59020	58	58	28	28	49.7	584	MSVRYSSSKHYSSSRSGGGGGGGGCGGGGGVSSLRISSSKGSLGGGFSSGGFSGGSFSRGSSGGGCFGGSSGGYGGLGGFGGGSFRGSYGSSSFGGSYGGIFGGGSFGGGSFGGGSFGGGGFGGGGFGGGFGGGFGGDGGLLSGNEKVTMQNLNDRLASYLDKVRALEESNYELEGKIKEWYEKHGNSHQGEPRDYSKYYKTIDDLKNQILNLTTDNANILLQIDNARLAADDFRLKYENEVALRQSVEADINGLRRVLDELTLTKADLEMQIESLTEELAYLKKNHEEEMKDLRNVSTGDVNVEMNAAPGVDLTQLLNNMRSQYEQLAEQNRKDAEAWFNEKSKELTTEIDNNIEQISSYKSEITELRRNVQALEIELQSQLALKQSLEASLAETEGR…	7428	6996	1	1	1	963.8	2888.38	3	2888.36	0.0139	0	33.98	0.072	R	NVSTGDVNVEMNAAPGVDLTQLLNNMR	S
6	1::sp|cRAP046|O76013|KRT36_HUMAN	Keratin, type I cuticular Ha6 OS=Homo sapiens GN=KRT36 PE=1 SV=1	44	53354	3	3	1	1	1.5	467	MATQTCTPTFSTGSIKGLCGTAGGISRVSSIRSVGSCRVPSLAGAAGYISSARSGLSGLGSCLPGSYLSSECHTSGFVGSGGWFCEGSFNGSEKETMQFLNDRLANYLEKVRQLERENAELESRIQEWYEFQIPYICPDYQSYFKTIEDFQQKILLTKSENARLVLQIDNAKLAADDFRTKYETELSLRQLVEADINGLRRILDELTLCKADLEAQVESLKEELMCLKKNHEEEVSVLRCQLGDRLNVEVDAAPPVDLNKILEDMRCQYEALVENNRRDVEAWFNTQTEELNQQVVSSSEQLQCCQTEIIELRRTVNALEIELQAQHSMRNSLESTLAETEARYSSQLAQMQCLISNVEAQLSEIRCDLERQNQEYQVLLDVKARLEGEIATYRHLLEG…	153	3132	1	0	0	404.202	806.39	2	806.392	-0.0019	0	38.58	0.006	K	LAADDFR	T
6	1::sp|cRAP046|O76013|KRT36_HUMAN	Keratin, type I cuticular Ha6 OS=Homo sapiens GN=KRT36 PE=1 SV=1	44	53354	3	3	1	1	1.5	467	MATQTCTPTFSTGSIKGLCGTAGGISRVSSIRSVGSCRVPSLAGAAGYISSARSGLSGLGSCLPGSYLSSECHTSGFVGSGGWFCEGSFNGSEKETMQFLNDRLANYLEKVRQLERENAELESRIQEWYEFQIPYICPDYQSYFKTIEDFQQKILLTKSENARLVLQIDNAKLAADDFRTKYETELSLRQLVEADINGLRRILDELTLCKADLEAQVESLKEELMCLKKNHEEEVSVLRCQLGDRLNVEVDAAPPVDLNKILEDMRCQYEALVENNRRDVEAWFNTQTEELNQQVVSSSEQLQCCQTEIIELRRTVNALEIELQAQHSMRNSLESTLAETEARYSSQLAQMQCLISNVEAQLSEIRCDLERQNQEYQVLLDVKARLEGEIATYRHLLEG…	155	3005	1	0	0	404.203	806.392	2	806.392	-0.0001	0	44.19	0.0018	K	LAADDFR	T
6	1::sp|cRAP046|O76013|KRT36_HUMAN	Keratin, type I cuticular Ha6 OS=Homo sapiens GN=KRT36 PE=1 SV=1	44	53354	3	3	1	1	1.5	467	MATQTCTPTFSTGSIKGLCGTAGGISRVSSIRSVGSCRVPSLAGAAGYISSARSGLSGLGSCLPGSYLSSECHTSGFVGSGGWFCEGSFNGSEKETMQFLNDRLANYLEKVRQLERENAELESRIQEWYEFQIPYICPDYQSYFKTIEDFQQKILLTKSENARLVLQIDNAKLAADDFRTKYETELSLRQLVEADINGLRRILDELTLCKADLEAQVESLKEELMCLKKNHEEEVSVLRCQLGDRLNVEVDAAPPVDLNKILEDMRCQYEALVENNRRDVEAWFNTQTEELNQQVVSSSEQLQCCQTEIIELRRTVNALEIELQAQHSMRNSLESTLAETEARYSSQLAQMQCLISNVEAQLSEIRCDLERQNQEYQVLLDVKARLEGEIATYRHLLEG…	156	2593	1	0	0	404.204	806.393	2	806.392	0.0012	0	34.38	0.014	K	LAADDFR	T
6	1::sp|cRAP047|O76014|KRT37_HUMAN	Keratin, type I cuticular Ha7 OS=Homo sapiens GN=KRT37 PE=2 SV=3	44	51084	3	3	1	1	1.6	449	MTSFYSTSSCPLGCTMAPGARNVFVSPIDVGCQPVAEANAASMCLLANVAHANRVRVGSTPLGRPSLCLPPTSHTACPLPGTCHIPGNIGICGAYGKNTLNGHEKETMKFLNDRLANYLEKVRQLEQENAELETTLLERSKCHESTVCPDYQSYFRTIEELQQKILCSKAENARLIVQIDNAKLAADDFRIKLESERSLHQLVEADKCGTQKLLDDATLAKADLEAQQESLKEEQLSLKSNHEQEVKILRSQLGEKFRIELDIEPTIDLNRVLGEMRAQYEAMVETNHQDVEQWFQAQSEGISLQAMSCSEELQCCQSEILELRCTVNALEVERQAQHTLKDCLQNSLCEAEDRYGTELAQMQSLISNLEEQLSEIRADLERQNQEYQVLLDVKARLEN…	153	3132	1	0	0	404.202	806.39	2	806.392	-0.0019	0	38.58	0.006	K	LAADDFR	I
6	1::sp|cRAP047|O76014|KRT37_HUMAN	Keratin, type I cuticular Ha7 OS=Homo sapiens GN=KRT37 PE=2 SV=3	44	51084	3	3	1	1	1.6	449	MTSFYSTSSCPLGCTMAPGARNVFVSPIDVGCQPVAEANAASMCLLANVAHANRVRVGSTPLGRPSLCLPPTSHTACPLPGTCHIPGNIGICGAYGKNTLNGHEKETMKFLNDRLANYLEKVRQLEQENAELETTLLERSKCHESTVCPDYQSYFRTIEELQQKILCSKAENARLIVQIDNAKLAADDFRIKLESERSLHQLVEADKCGTQKLLDDATLAKADLEAQQESLKEEQLSLKSNHEQEVKILRSQLGEKFRIELDIEPTIDLNRVLGEMRAQYEAMVETNHQDVEQWFQAQSEGISLQAMSCSEELQCCQSEILELRCTVNALEVERQAQHTLKDCLQNSLCEAEDRYGTELAQMQSLISNLEEQLSEIRADLERQNQEYQVLLDVKARLEN…	155	3005	1	0	0	404.203	806.392	2	806.392	-0.0001	0	44.19	0.0018	K	LAADDFR	I
6	1::sp|cRAP047|O76014|KRT37_HUMAN	Keratin, type I cuticular Ha7 OS=Homo sapiens GN=KRT37 PE=2 SV=3	44	51084	3	3	1	1	1.6	449	MTSFYSTSSCPLGCTMAPGARNVFVSPIDVGCQPVAEANAASMCLLANVAHANRVRVGSTPLGRPSLCLPPTSHTACPLPGTCHIPGNIGICGAYGKNTLNGHEKETMKFLNDRLANYLEKVRQLEQENAELETTLLERSKCHESTVCPDYQSYFRTIEELQQKILCSKAENARLIVQIDNAKLAADDFRIKLESERSLHQLVEADKCGTQKLLDDATLAKADLEAQQESLKEEQLSLKSNHEQEVKILRSQLGEKFRIELDIEPTIDLNRVLGEMRAQYEAMVETNHQDVEQWFQAQSEGISLQAMSCSEELQCCQSEILELRCTVNALEVERQAQHTLKDCLQNSLCEAEDRYGTELAQMQSLISNLEEQLSEIRADLERQNQEYQVLLDVKARLEN…	156	2593	1	0	0	404.204	806.393	2	806.392	0.0012	0	34.38	0.014	K	LAADDFR	I
6	1::sp|cRAP048|O76015|KRT38_HUMAN	Keratin, type I cuticular Ha8 OS=Homo sapiens GN=KRT38 PE=2 SV=3	44	52044	3	3	1	1	1.5	456	MTSSYSSSSCPLGCTMAPGARNVSVSPIDIGCQPGAEANIAPMCLLANVAHANRVRVGSTPLGRPSLCLPPTCHTACPLPGTCHIPGNIGICGAYGENTLNGHEKETMQFLNDRLANYLEKVRQLEQENAELEATLLERSKCHESTVCPDYQSYFHTIEELQQKILCSKAENARLIVQIDNAKLAADDFRIKLESERSLRQLVEADKCGTQKLLDDATLAKADLEAQQESLKEEQLSLKSNHEQEVKILRSQLGEKLRIELDIEPTIDLNRVLGEMRAQYEAMLETNRQDVEQWFQAQSEGISLQDMSCSEELQCCQSEILELRCTVNALEVERQAQHTLKDCLQNSLCEAEDRFGTELAQMQSLISNVEEQLSEIRADLERQNQEYQVLLDVKTRLEN…	153	3132	1	0	0	404.202	806.39	2	806.392	-0.0019	0	38.58	0.006	K	LAADDFR	I
6	1::sp|cRAP048|O76015|KRT38_HUMAN	Keratin, type I cuticular Ha8 OS=Homo sapiens GN=KRT38 PE=2 SV=3	44	52044	3	3	1	1	1.5	456	MTSSYSSSSCPLGCTMAPGARNVSVSPIDIGCQPGAEANIAPMCLLANVAHANRVRVGSTPLGRPSLCLPPTCHTACPLPGTCHIPGNIGICGAYGENTLNGHEKETMQFLNDRLANYLEKVRQLEQENAELEATLLERSKCHESTVCPDYQSYFHTIEELQQKILCSKAENARLIVQIDNAKLAADDFRIKLESERSLRQLVEADKCGTQKLLDDATLAKADLEAQQESLKEEQLSLKSNHEQEVKILRSQLGEKLRIELDIEPTIDLNRVLGEMRAQYEAMLETNRQDVEQWFQAQSEGISLQDMSCSEELQCCQSEILELRCTVNALEVERQAQHTLKDCLQNSLCEAEDRFGTELAQMQSLISNVEEQLSEIRADLERQNQEYQVLLDVKTRLEN…	155	3005	1	0	0	404.203	806.392	2	806.392	-0.0001	0	44.19	0.0018	K	LAADDFR	I
6	1::sp|cRAP048|O76015|KRT38_HUMAN	Keratin, type I cuticular Ha8 OS=Homo sapiens GN=KRT38 PE=2 SV=3	44	52044	3	3	1	1	1.5	456	MTSSYSSSSCPLGCTMAPGARNVSVSPIDIGCQPGAEANIAPMCLLANVAHANRVRVGSTPLGRPSLCLPPTCHTACPLPGTCHIPGNIGICGAYGENTLNGHEKETMQFLNDRLANYLEKVRQLEQENAELEATLLERSKCHESTVCPDYQSYFHTIEELQQKILCSKAENARLIVQIDNAKLAADDFRIKLESERSLRQLVEADKCGTQKLLDDATLAKADLEAQQESLKEEQLSLKSNHEQEVKILRSQLGEKLRIELDIEPTIDLNRVLGEMRAQYEAMLETNRQDVEQWFQAQSEGISLQDMSCSEELQCCQSEILELRCTVNALEVERQAQHTLKDCLQNSLCEAEDRFGTELAQMQSLISNVEEQLSEIRADLERQNQEYQVLLDVKTRLEN…	156	2593	1	0	0	404.204	806.393	2	806.392	0.0012	0	34.38	0.014	K	LAADDFR	I
7	1::sp|cRAP053|P35908|K22E_HUMAN	Keratin, type II cytoskeletal 2 epidermal OS=Homo sapiens GN=KRT2 PE=1 SV=2	1798	65678	37	37	30	30	50.2	639	MSCQISCKSRGRGGGGGGFRGFSSGSAVVSGGSRRSTSSFSCLSRHGGGGGGFGGGGFGSRSLVGLGGTKSISISVAGGGGGFGAAGGFGGRGGGFGGGSSFGGGSGFSGGGFGGGGFGGGRFGGFGGPGGVGGLGGPGGFGPGGYPGGIHEVSVNQSLLQPLNVKVDPEIQNVKAQEREQIKTLNNKFASFIDKVRFLEQQNQVLQTKWELLQQMNVGTRPINLEPIFQGYIDSLKRYLDGLTAERTSQNSELNNMQDLVEDYKKKYEDEINKRTAAENDFVTLKKDVDNAYMIKVELQSKVDLLNQEIEFLKVLYDAEISQIHQSVTDTNVILSMDNSRNLDLDSIIAEVKAQYEEIAQRSKEEAEALYHSKYEELQVTVGRHGDSLKEIKIEISEL…	55	1197	1	1	1	390.193	778.371	2	778.372	-0.0013	0	35.4	0.0066	K	AAFGGSGGR	G
7	1::sp|cRAP053|P35908|K22E_HUMAN	Keratin, type II cytoskeletal 2 epidermal OS=Homo sapiens GN=KRT2 PE=1 SV=2	1798	65678	37	37	30	30	50.2	639	MSCQISCKSRGRGGGGGGFRGFSSGSAVVSGGSRRSTSSFSCLSRHGGGGGGFGGGGFGSRSLVGLGGTKSISISVAGGGGGFGAAGGFGGRGGGFGGGSSFGGGSGFSGGGFGGGGFGGGRFGGFGGPGGVGGLGGPGGFGPGGYPGGIHEVSVNQSLLQPLNVKVDPEIQNVKAQEREQIKTLNNKFASFIDKVRFLEQQNQVLQTKWELLQQMNVGTRPINLEPIFQGYIDSLKRYLDGLTAERTSQNSELNNMQDLVEDYKKKYEDEINKRTAAENDFVTLKKDVDNAYMIKVELQSKVDLLNQEIEFLKVLYDAEISQIHQSVTDTNVILSMDNSRNLDLDSIIAEVKAQYEEIAQRSKEEAEALYHSKYEELQVTVGRHGDSLKEIKIEISEL…	252	4103	1	1	0	414.218	826.422	2	826.423	-0.0005	0	42.93	0.0012	K	FASFIDK	V
7	1::sp|cRAP053|P35908|K22E_HUMAN	Keratin, type II cytoskeletal 2 epidermal OS=Homo sapiens GN=KRT2 PE=1 SV=2	1798	65678	37	37	30	30	50.2	639	MSCQISCKSRGRGGGGGGFRGFSSGSAVVSGGSRRSTSSFSCLSRHGGGGGGFGGGGFGSRSLVGLGGTKSISISVAGGGGGFGAAGGFGGRGGGFGGGSSFGGGSGFSGGGFGGGGFGGGRFGGFGGPGGVGGLGGPGGFGPGGYPGGIHEVSVNQSLLQPLNVKVDPEIQNVKAQEREQIKTLNNKFASFIDKVRFLEQQNQVLQTKWELLQQMNVGTRPINLEPIFQGYIDSLKRYLDGLTAERTSQNSELNNMQDLVEDYKKKYEDEINKRTAAENDFVTLKKDVDNAYMIKVELQSKVDLLNQEIEFLKVLYDAEISQIHQSVTDTNVILSMDNSRNLDLDSIIAEVKAQYEEIAQRSKEEAEALYHSKYEELQVTVGRHGDSLKEIKIEISEL…	799	3587	1	0	0	487.269	972.524	2	972.524	-0.0003	0	54.67	0.00045	K	IEISELNR	V
7	1::sp|cRAP053|P35908|K22E_HUMAN	Keratin, type II cytoskeletal 2 epidermal OS=Homo sapiens GN=KRT2 PE=1 SV=2	1798	65678	37	37	30	30	50.2	639	MSCQISCKSRGRGGGGGGFRGFSSGSAVVSGGSRRSTSSFSCLSRHGGGGGGFGGGGFGSRSLVGLGGTKSISISVAGGGGGFGAAGGFGGRGGGFGGGSSFGGGSGFSGGGFGGGGFGGGRFGGFGGPGGVGGLGGPGGFGPGGYPGGIHEVSVNQSLLQPLNVKVDPEIQNVKAQEREQIKTLNNKFASFIDKVRFLEQQNQVLQTKWELLQQMNVGTRPINLEPIFQGYIDSLKRYLDGLTAERTSQNSELNNMQDLVEDYKKKYEDEINKRTAAENDFVTLKKDVDNAYMIKVELQSKVDLLNQEIEFLKVLYDAEISQIHQSVTDTNVILSMDNSRNLDLDSIIAEVKAQYEEIAQRSKEEAEALYHSKYEELQVTVGRHGDSLKEIKIEISEL…	907	1701	1	1	1	497.788	993.56	2	993.561	-0.0003	0	39.86	0.0032	R	LQGEIAHVK	K
7	1::sp|cRAP053|P35908|K22E_HUMAN	Keratin, type II cytoskeletal 2 epidermal OS=Homo sapiens GN=KRT2 PE=1 SV=2	1798	65678	37	37	30	30	50.2	639	MSCQISCKSRGRGGGGGGFRGFSSGSAVVSGGSRRSTSSFSCLSRHGGGGGGFGGGGFGSRSLVGLGGTKSISISVAGGGGGFGAAGGFGGRGGGFGGGSSFGGGSGFSGGGFGGGGFGGGRFGGFGGPGGVGGLGGPGGFGPGGYPGGIHEVSVNQSLLQPLNVKVDPEIQNVKAQEREQIKTLNNKFASFIDKVRFLEQQNQVLQTKWELLQQMNVGTRPINLEPIFQGYIDSLKRYLDGLTAERTSQNSELNNMQDLVEDYKKKYEDEINKRTAAENDFVTLKKDVDNAYMIKVELQSKVDLLNQEIEFLKVLYDAEISQIHQSVTDTNVILSMDNSRNLDLDSIIAEVKAQYEEIAQRSKEEAEALYHSKYEELQVTVGRHGDSLKEIKIEISEL…	957	2039	1	1	0	503.237	1004.46	2	1004.46	-0.0007	0	42.9	0.0047	K	LLEGEECR	M
7	1::sp|cRAP053|P35908|K22E_HUMAN	Keratin, type II cytoskeletal 2 epidermal OS=Homo sapiens GN=KRT2 PE=1 SV=2	1798	65678	37	37	30	30	50.2	639	MSCQISCKSRGRGGGGGGFRGFSSGSAVVSGGSRRSTSSFSCLSRHGGGGGGFGGGGFGSRSLVGLGGTKSISISVAGGGGGFGAAGGFGGRGGGFGGGSSFGGGSGFSGGGFGGGGFGGGRFGGFGGPGGVGGLGGPGGFGPGGYPGGIHEVSVNQSLLQPLNVKVDPEIQNVKAQEREQIKTLNNKFASFIDKVRFLEQQNQVLQTKWELLQQMNVGTRPINLEPIFQGYIDSLKRYLDGLTAERTSQNSELNNMQDLVEDYKKKYEDEINKRTAAENDFVTLKKDVDNAYMIKVELQSKVDLLNQEIEFLKVLYDAEISQIHQSVTDTNVILSMDNSRNLDLDSIIAEVKAQYEEIAQRSKEEAEALYHSKYEELQVTVGRHGDSLKEIKIEISEL…	1082	2516	1	1	1	521.283	1040.55	2	1040.55	0.0004	0	20.34	0.48	K	VDPEIQNVK	A
7	1::sp|cRAP053|P35908|K22E_HUMAN	Keratin, type II cytoskeletal 2 epidermal OS=Homo sapiens GN=KRT2 PE=1 SV=2	1798	65678	37	37	30	30	50.2	639	MSCQISCKSRGRGGGGGGFRGFSSGSAVVSGGSRRSTSSFSCLSRHGGGGGGFGGGGFGSRSLVGLGGTKSISISVAGGGGGFGAAGGFGGRGGGFGGGSSFGGGSGFSGGGFGGGGFGGGRFGGFGGPGGVGGLGGPGGFGPGGYPGGIHEVSVNQSLLQPLNVKVDPEIQNVKAQEREQIKTLNNKFASFIDKVRFLEQQNQVLQTKWELLQQMNVGTRPINLEPIFQGYIDSLKRYLDGLTAERTSQNSELNNMQDLVEDYKKKYEDEINKRTAAENDFVTLKKDVDNAYMIKVELQSKVDLLNQEIEFLKVLYDAEISQIHQSVTDTNVILSMDNSRNLDLDSIIAEVKAQYEEIAQRSKEEAEALYHSKYEELQVTVGRHGDSLKEIKIEISEL…	1204	1101	1	0	0	533.762	1065.51	2	1065.51	0.0004	1	50.34	0.0008	K	YEDEINKR	T
7	1::sp|cRAP053|P35908|K22E_HUMAN	Keratin, type II cytoskeletal 2 epidermal OS=Homo sapiens GN=KRT2 PE=1 SV=2	1798	65678	37	37	30	30	50.2	639	MSCQISCKSRGRGGGGGGFRGFSSGSAVVSGGSRRSTSSFSCLSRHGGGGGGFGGGGFGSRSLVGLGGTKSISISVAGGGGGFGAAGGFGGRGGGFGGGSSFGGGSGFSGGGFGGGGFGGGRFGGFGGPGGVGGLGGPGGFGPGGYPGGIHEVSVNQSLLQPLNVKVDPEIQNVKAQEREQIKTLNNKFASFIDKVRFLEQQNQVLQTKWELLQQMNVGTRPINLEPIFQGYIDSLKRYLDGLTAERTSQNSELNNMQDLVEDYKKKYEDEINKRTAAENDFVTLKKDVDNAYMIKVELQSKVDLLNQEIEFLKVLYDAEISQIHQSVTDTNVILSMDNSRNLDLDSIIAEVKAQYEEIAQRSKEEAEALYHSKYEELQVTVGRHGDSLKEIKIEISEL…	1264	3189	1	1	1	542.754	1083.49	2	1083.49	0.0021	0	32.71	0.031	K	DVDNAYMIK	V
7	1::sp|cRAP053|P35908|K22E_HUMAN	Keratin, type II cytoskeletal 2 epidermal OS=Homo sapiens GN=KRT2 PE=1 SV=2	1798	65678	37	37	30	30	50.2	639	MSCQISCKSRGRGGGGGGFRGFSSGSAVVSGGSRRSTSSFSCLSRHGGGGGGFGGGGFGSRSLVGLGGTKSISISVAGGGGGFGAAGGFGGRGGGFGGGSSFGGGSGFSGGGFGGGGFGGGRFGGFGGPGGVGGLGGPGGFGPGGYPGGIHEVSVNQSLLQPLNVKVDPEIQNVKAQEREQIKTLNNKFASFIDKVRFLEQQNQVLQTKWELLQQMNVGTRPINLEPIFQGYIDSLKRYLDGLTAERTSQNSELNNMQDLVEDYKKKYEDEINKRTAAENDFVTLKKDVDNAYMIKVELQSKVDLLNQEIEFLKVLYDAEISQIHQSVTDTNVILSMDNSRNLDLDSIIAEVKAQYEEIAQRSKEEAEALYHSKYEELQVTVGRHGDSLKEIKIEISEL…	1367	2310	1	1	1	554.276	1106.54	2	1106.54	0.0016	0	54.04	0.00044	K	AQYEEIAQR	S
7	1::sp|cRAP053|P35908|K22E_HUMAN	Keratin, type II cytoskeletal 2 epidermal OS=Homo sapiens GN=KRT2 PE=1 SV=2	1798	65678	37	37	30	30	50.2	639	MSCQISCKSRGRGGGGGGFRGFSSGSAVVSGGSRRSTSSFSCLSRHGGGGGGFGGGGFGSRSLVGLGGTKSISISVAGGGGGFGAAGGFGGRGGGFGGGSSFGGGSGFSGGGFGGGGFGGGRFGGFGGPGGVGGLGGPGGFGPGGYPGGIHEVSVNQSLLQPLNVKVDPEIQNVKAQEREQIKTLNNKFASFIDKVRFLEQQNQVLQTKWELLQQMNVGTRPINLEPIFQGYIDSLKRYLDGLTAERTSQNSELNNMQDLVEDYKKKYEDEINKRTAAENDFVTLKKDVDNAYMIKVELQSKVDLLNQEIEFLKVLYDAEISQIHQSVTDTNVILSMDNSRNLDLDSIIAEVKAQYEEIAQRSKEEAEALYHSKYEELQVTVGRHGDSLKEIKIEISEL…	1469	2903	1	1	1	566.259	1130.5	2	1130.5	-0.0001	0	58.78	5.1e-05	R	STSSFSCLSR	H
7	1::sp|cRAP053|P35908|K22E_HUMAN	Keratin, type II cytoskeletal 2 epidermal OS=Homo sapiens GN=KRT2 PE=1 SV=2	1798	65678	37	37	30	30	50.2	639	MSCQISCKSRGRGGGGGGFRGFSSGSAVVSGGSRRSTSSFSCLSRHGGGGGGFGGGGFGSRSLVGLGGTKSISISVAGGGGGFGAAGGFGGRGGGFGGGSSFGGGSGFSGGGFGGGGFGGGRFGGFGGPGGVGGLGGPGGFGPGGYPGGIHEVSVNQSLLQPLNVKVDPEIQNVKAQEREQIKTLNNKFASFIDKVRFLEQQNQVLQTKWELLQQMNVGTRPINLEPIFQGYIDSLKRYLDGLTAERTSQNSELNNMQDLVEDYKKKYEDEINKRTAAENDFVTLKKDVDNAYMIKVELQSKVDLLNQEIEFLKVLYDAEISQIHQSVTDTNVILSMDNSRNLDLDSIIAEVKAQYEEIAQRSKEEAEALYHSKYEELQVTVGRHGDSLKEIKIEISEL…	1480	1690	1	1	0	567.284	1132.55	2	1132.55	-0.0011	1	34.89	0.043	R	KLLEGEECR	M
7	1::sp|cRAP053|P35908|K22E_HUMAN	Keratin, type II cytoskeletal 2 epidermal OS=Homo sapiens GN=KRT2 PE=1 SV=2	1798	65678	37	37	30	30	50.2	639	MSCQISCKSRGRGGGGGGFRGFSSGSAVVSGGSRRSTSSFSCLSRHGGGGGGFGGGGFGSRSLVGLGGTKSISISVAGGGGGFGAAGGFGGRGGGFGGGSSFGGGSGFSGGGFGGGGFGGGRFGGFGGPGGVGGLGGPGGFGPGGYPGGIHEVSVNQSLLQPLNVKVDPEIQNVKAQEREQIKTLNNKFASFIDKVRFLEQQNQVLQTKWELLQQMNVGTRPINLEPIFQGYIDSLKRYLDGLTAERTSQNSELNNMQDLVEDYKKKYEDEINKRTAAENDFVTLKKDVDNAYMIKVELQSKVDLLNQEIEFLKVLYDAEISQIHQSVTDTNVILSMDNSRNLDLDSIIAEVKAQYEEIAQRSKEEAEALYHSKYEELQVTVGRHGDSLKEIKIEISEL…	1507	4607	1	1	0	570.274	1138.53	2	1138.53	0	0	46.31	0.002	R	DYQELMNVK	L
7	1::sp|cRAP053|P35908|K22E_HUMAN	Keratin, type II cytoskeletal 2 epidermal OS=Homo sapiens GN=KRT2 PE=1 SV=2	1798	65678	37	37	30	30	50.2	639	MSCQISCKSRGRGGGGGGFRGFSSGSAVVSGGSRRSTSSFSCLSRHGGGGGGFGGGGFGSRSLVGLGGTKSISISVAGGGGGFGAAGGFGGRGGGFGGGSSFGGGSGFSGGGFGGGGFGGGRFGGFGGPGGVGGLGGPGGFGPGGYPGGIHEVSVNQSLLQPLNVKVDPEIQNVKAQEREQIKTLNNKFASFIDKVRFLEQQNQVLQTKWELLQQMNVGTRPINLEPIFQGYIDSLKRYLDGLTAERTSQNSELNNMQDLVEDYKKKYEDEINKRTAAENDFVTLKKDVDNAYMIKVELQSKVDLLNQEIEFLKVLYDAEISQIHQSVTDTNVILSMDNSRNLDLDSIIAEVKAQYEEIAQRSKEEAEALYHSKYEELQVTVGRHGDSLKEIKIEISEL…	1601	3172	1	1	0	578.271	1154.53	2	1154.53	-0.0002	0	40.57	0.0059	R	DYQELMNVK	L
7	1::sp|cRAP053|P35908|K22E_HUMAN	Keratin, type II cytoskeletal 2 epidermal OS=Homo sapiens GN=KRT2 PE=1 SV=2	1798	65678	37	37	30	30	50.2	639	MSCQISCKSRGRGGGGGGFRGFSSGSAVVSGGSRRSTSSFSCLSRHGGGGGGFGGGGFGSRSLVGLGGTKSISISVAGGGGGFGAAGGFGGRGGGFGGGSSFGGGSGFSGGGFGGGGFGGGRFGGFGGPGGVGGLGGPGGFGPGGYPGGIHEVSVNQSLLQPLNVKVDPEIQNVKAQEREQIKTLNNKFASFIDKVRFLEQQNQVLQTKWELLQQMNVGTRPINLEPIFQGYIDSLKRYLDGLTAERTSQNSELNNMQDLVEDYKKKYEDEINKRTAAENDFVTLKKDVDNAYMIKVELQSKVDLLNQEIEFLKVLYDAEISQIHQSVTDTNVILSMDNSRNLDLDSIIAEVKAQYEEIAQRSKEEAEALYHSKYEELQVTVGRHGDSLKEIKIEISEL…	1756	4005	1	1	1	597.312	1192.61	2	1192.61	0.0006	0	63.48	4.7e-05	K	YEELQVTVGR	H
7	1::sp|cRAP053|P35908|K22E_HUMAN	Keratin, type II cytoskeletal 2 epidermal OS=Homo sapiens GN=KRT2 PE=1 SV=2	1798	65678	37	37	30	30	50.2	639	MSCQISCKSRGRGGGGGGFRGFSSGSAVVSGGSRRSTSSFSCLSRHGGGGGGFGGGGFGSRSLVGLGGTKSISISVAGGGGGFGAAGGFGGRGGGFGGGSSFGGGSGFSGGGFGGGGFGGGRFGGFGGPGGVGGLGGPGGFGPGGYPGGIHEVSVNQSLLQPLNVKVDPEIQNVKAQEREQIKTLNNKFASFIDKVRFLEQQNQVLQTKWELLQQMNVGTRPINLEPIFQGYIDSLKRYLDGLTAERTSQNSELNNMQDLVEDYKKKYEDEINKRTAAENDFVTLKKDVDNAYMIKVELQSKVDLLNQEIEFLKVLYDAEISQIHQSVTDTNVILSMDNSRNLDLDSIIAEVKAQYEEIAQRSKEEAEALYHSKYEELQVTVGRHGDSLKEIKIEISEL…	1757	3868	1	1	1	597.313	1192.61	2	1192.61	0.0023	0	74.55	3.7e-06	K	YEELQVTVGR	H
7	1::sp|cRAP053|P35908|K22E_HUMAN	Keratin, type II cytoskeletal 2 epidermal OS=Homo sapiens GN=KRT2 PE=1 SV=2	1798	65678	37	37	30	30	50.2	639	MSCQISCKSRGRGGGGGGFRGFSSGSAVVSGGSRRSTSSFSCLSRHGGGGGGFGGGGFGSRSLVGLGGTKSISISVAGGGGGFGAAGGFGGRGGGFGGGSSFGGGSGFSGGGFGGGGFGGGRFGGFGGPGGVGGLGGPGGFGPGGYPGGIHEVSVNQSLLQPLNVKVDPEIQNVKAQEREQIKTLNNKFASFIDKVRFLEQQNQVLQTKWELLQQMNVGTRPINLEPIFQGYIDSLKRYLDGLTAERTSQNSELNNMQDLVEDYKKKYEDEINKRTAAENDFVTLKKDVDNAYMIKVELQSKVDLLNQEIEFLKVLYDAEISQIHQSVTDTNVILSMDNSRNLDLDSIIAEVKAQYEEIAQRSKEEAEALYHSKYEELQVTVGRHGDSLKEIKIEISEL…	1764	1406	1	1	1	398.875	1193.6	3	1193.6	-0.0005	2	52.72	0.00053	K	KYEDEINKR	T
7	1::sp|cRAP053|P35908|K22E_HUMAN	Keratin, type II cytoskeletal 2 epidermal OS=Homo sapiens GN=KRT2 PE=1 SV=2	1798	65678	37	37	30	30	50.2	639	MSCQISCKSRGRGGGGGGFRGFSSGSAVVSGGSRRSTSSFSCLSRHGGGGGGFGGGGFGSRSLVGLGGTKSISISVAGGGGGFGAAGGFGGRGGGFGGGSSFGGGSGFSGGGFGGGGFGGGRFGGFGGPGGVGGLGGPGGFGPGGYPGGIHEVSVNQSLLQPLNVKVDPEIQNVKAQEREQIKTLNNKFASFIDKVRFLEQQNQVLQTKWELLQQMNVGTRPINLEPIFQGYIDSLKRYLDGLTAERTSQNSELNNMQDLVEDYKKKYEDEINKRTAAENDFVTLKKDVDNAYMIKVELQSKVDLLNQEIEFLKVLYDAEISQIHQSVTDTNVILSMDNSRNLDLDSIIAEVKAQYEEIAQRSKEEAEALYHSKYEELQVTVGRHGDSLKEIKIEISEL…	1823	4081	1	1	1	604.811	1207.61	2	1207.61	-0.0007	0	74.29	4.1e-06	R	TAAENDFVTLK	K
7	1::sp|cRAP053|P35908|K22E_HUMAN	Keratin, type II cytoskeletal 2 epidermal OS=Homo sapiens GN=KRT2 PE=1 SV=2	1798	65678	37	37	30	30	50.2	639	MSCQISCKSRGRGGGGGGFRGFSSGSAVVSGGSRRSTSSFSCLSRHGGGGGGFGGGGFGSRSLVGLGGTKSISISVAGGGGGFGAAGGFGGRGGGFGGGSSFGGGSGFSGGGFGGGGFGGGRFGGFGGPGGVGGLGGPGGFGPGGYPGGIHEVSVNQSLLQPLNVKVDPEIQNVKAQEREQIKTLNNKFASFIDKVRFLEQQNQVLQTKWELLQQMNVGTRPINLEPIFQGYIDSLKRYLDGLTAERTSQNSELNNMQDLVEDYKKKYEDEINKRTAAENDFVTLKKDVDNAYMIKVELQSKVDLLNQEIEFLKVLYDAEISQIHQSVTDTNVILSMDNSRNLDLDSIIAEVKAQYEEIAQRSKEEAEALYHSKYEELQVTVGRHGDSLKEIKIEISEL…	2035	2456	1	1	1	627.807	1253.6	2	1253.6	-0.0007	0	77.65	1.5e-06	R	GFSSGSAVVSGGSR	R
7	1::sp|cRAP053|P35908|K22E_HUMAN	Keratin, type II cytoskeletal 2 epidermal OS=Homo sapiens GN=KRT2 PE=1 SV=2	1798	65678	37	37	30	30	50.2	639	MSCQISCKSRGRGGGGGGFRGFSSGSAVVSGGSRRSTSSFSCLSRHGGGGGGFGGGGFGSRSLVGLGGTKSISISVAGGGGGFGAAGGFGGRGGGFGGGSSFGGGSGFSGGGFGGGGFGGGRFGGFGGPGGVGGLGGPGGFGPGGYPGGIHEVSVNQSLLQPLNVKVDPEIQNVKAQEREQIKTLNNKFASFIDKVRFLEQQNQVLQTKWELLQQMNVGTRPINLEPIFQGYIDSLKRYLDGLTAERTSQNSELNNMQDLVEDYKKKYEDEINKRTAAENDFVTLKKDVDNAYMIKVELQSKVDLLNQEIEFLKVLYDAEISQIHQSVTDTNVILSMDNSRNLDLDSIIAEVKAQYEEIAQRSKEEAEALYHSKYEELQVTVGRHGDSLKEIKIEISEL…	2061	5788	1	1	1	632.351	1262.69	2	1262.69	0.0002	0	64.81	2.3e-05	K	LALDVEIATYR	K
7	1::sp|cRAP053|P35908|K22E_HUMAN	Keratin, type II cytoskeletal 2 epidermal OS=Homo sapiens GN=KRT2 PE=1 SV=2	1798	65678	37	37	30	30	50.2	639	MSCQISCKSRGRGGGGGGFRGFSSGSAVVSGGSRRSTSSFSCLSRHGGGGGGFGGGGFGSRSLVGLGGTKSISISVAGGGGGFGAAGGFGGRGGGFGGGSSFGGGSGFSGGGFGGGGFGGGRFGGFGGPGGVGGLGGPGGFGPGGYPGGIHEVSVNQSLLQPLNVKVDPEIQNVKAQEREQIKTLNNKFASFIDKVRFLEQQNQVLQTKWELLQQMNVGTRPINLEPIFQGYIDSLKRYLDGLTAERTSQNSELNNMQDLVEDYKKKYEDEINKRTAAENDFVTLKKDVDNAYMIKVELQSKVDLLNQEIEFLKVLYDAEISQIHQSVTDTNVILSMDNSRNLDLDSIIAEVKAQYEEIAQRSKEEAEALYHSKYEELQVTVGRHGDSLKEIKIEISEL…	2348	4047	1	1	1	440.865	1319.57	3	1319.58	-0.0008	0	35.1	0.016	R	HGGGGGGFGGGGFGSR	S
7	1::sp|cRAP053|P35908|K22E_HUMAN	Keratin, type II cytoskeletal 2 epidermal OS=Homo sapiens GN=KRT2 PE=1 SV=2	1798	65678	37	37	30	30	50.2	639	MSCQISCKSRGRGGGGGGFRGFSSGSAVVSGGSRRSTSSFSCLSRHGGGGGGFGGGGFGSRSLVGLGGTKSISISVAGGGGGFGAAGGFGGRGGGFGGGSSFGGGSGFSGGGFGGGGFGGGRFGGFGGPGGVGGLGGPGGFGPGGYPGGIHEVSVNQSLLQPLNVKVDPEIQNVKAQEREQIKTLNNKFASFIDKVRFLEQQNQVLQTKWELLQQMNVGTRPINLEPIFQGYIDSLKRYLDGLTAERTSQNSELNNMQDLVEDYKKKYEDEINKRTAAENDFVTLKKDVDNAYMIKVELQSKVDLLNQEIEFLKVLYDAEISQIHQSVTDTNVILSMDNSRNLDLDSIIAEVKAQYEEIAQRSKEEAEALYHSKYEELQVTVGRHGDSLKEIKIEISEL…	2349	4184	1	1	1	440.866	1319.58	3	1319.58	-0.0004	0	41.69	0.0035	R	HGGGGGGFGGGGFGSR	S
7	1::sp|cRAP053|P35908|K22E_HUMAN	Keratin, type II cytoskeletal 2 epidermal OS=Homo sapiens GN=KRT2 PE=1 SV=2	1798	65678	37	37	30	30	50.2	639	MSCQISCKSRGRGGGGGGFRGFSSGSAVVSGGSRRSTSSFSCLSRHGGGGGGFGGGGFGSRSLVGLGGTKSISISVAGGGGGFGAAGGFGGRGGGFGGGSSFGGGSGFSGGGFGGGGFGGGRFGGFGGPGGVGGLGGPGGFGPGGYPGGIHEVSVNQSLLQPLNVKVDPEIQNVKAQEREQIKTLNNKFASFIDKVRFLEQQNQVLQTKWELLQQMNVGTRPINLEPIFQGYIDSLKRYLDGLTAERTSQNSELNNMQDLVEDYKKKYEDEINKRTAAENDFVTLKKDVDNAYMIKVELQSKVDLLNQEIEFLKVLYDAEISQIHQSVTDTNVILSMDNSRNLDLDSIIAEVKAQYEEIAQRSKEEAEALYHSKYEELQVTVGRHGDSLKEIKIEISEL…	2387	3591	1	1	1	665.323	1328.63	2	1328.63	-0.001	0	63.41	3.9e-05	K	NVQDAIADAEQR	G
7	1::sp|cRAP053|P35908|K22E_HUMAN	Keratin, type II cytoskeletal 2 epidermal OS=Homo sapiens GN=KRT2 PE=1 SV=2	1798	65678	37	37	30	30	50.2	639	MSCQISCKSRGRGGGGGGFRGFSSGSAVVSGGSRRSTSSFSCLSRHGGGGGGFGGGGFGSRSLVGLGGTKSISISVAGGGGGFGAAGGFGGRGGGFGGGSSFGGGSGFSGGGFGGGGFGGGRFGGFGGPGGVGGLGGPGGFGPGGYPGGIHEVSVNQSLLQPLNVKVDPEIQNVKAQEREQIKTLNNKFASFIDKVRFLEQQNQVLQTKWELLQQMNVGTRPINLEPIFQGYIDSLKRYLDGLTAERTSQNSELNNMQDLVEDYKKKYEDEINKRTAAENDFVTLKKDVDNAYMIKVELQSKVDLLNQEIEFLKVLYDAEISQIHQSVTDTNVILSMDNSRNLDLDSIIAEVKAQYEEIAQRSKEEAEALYHSKYEELQVTVGRHGDSLKEIKIEISEL…	2388	7260	1	1	0	665.366	1328.72	2	1328.72	-0.0003	0	57.49	0.00021	R	NLDLDSIIAEVK	A
7	1::sp|cRAP053|P35908|K22E_HUMAN	Keratin, type II cytoskeletal 2 epidermal OS=Homo sapiens GN=KRT2 PE=1 SV=2	1798	65678	37	37	30	30	50.2	639	MSCQISCKSRGRGGGGGGFRGFSSGSAVVSGGSRRSTSSFSCLSRHGGGGGGFGGGGFGSRSLVGLGGTKSISISVAGGGGGFGAAGGFGGRGGGFGGGSSFGGGSGFSGGGFGGGGFGGGRFGGFGGPGGVGGLGGPGGFGPGGYPGGIHEVSVNQSLLQPLNVKVDPEIQNVKAQEREQIKTLNNKFASFIDKVRFLEQQNQVLQTKWELLQQMNVGTRPINLEPIFQGYIDSLKRYLDGLTAERTSQNSELNNMQDLVEDYKKKYEDEINKRTAAENDFVTLKKDVDNAYMIKVELQSKVDLLNQEIEFLKVLYDAEISQIHQSVTDTNVILSMDNSRNLDLDSIIAEVKAQYEEIAQRSKEEAEALYHSKYEELQVTVGRHGDSLKEIKIEISEL…	2400	2876	1	1	1	668.858	1335.7	2	1335.7	-0.0012	1	56.81	0.00022	R	TAAENDFVTLKK	D
7	1::sp|cRAP053|P35908|K22E_HUMAN	Keratin, type II cytoskeletal 2 epidermal OS=Homo sapiens GN=KRT2 PE=1 SV=2	1798	65678	37	37	30	30	50.2	639	MSCQISCKSRGRGGGGGGFRGFSSGSAVVSGGSRRSTSSFSCLSRHGGGGGGFGGGGFGSRSLVGLGGTKSISISVAGGGGGFGAAGGFGGRGGGFGGGSSFGGGSGFSGGGFGGGGFGGGRFGGFGGPGGVGGLGGPGGFGPGGYPGGIHEVSVNQSLLQPLNVKVDPEIQNVKAQEREQIKTLNNKFASFIDKVRFLEQQNQVLQTKWELLQQMNVGTRPINLEPIFQGYIDSLKRYLDGLTAERTSQNSELNNMQDLVEDYKKKYEDEINKRTAAENDFVTLKKDVDNAYMIKVELQSKVDLLNQEIEFLKVLYDAEISQIHQSVTDTNVILSMDNSRNLDLDSIIAEVKAQYEEIAQRSKEEAEALYHSKYEELQVTVGRHGDSLKEIKIEISEL…	2625	5082	1	1	1	686.359	1370.7	2	1370.7	-0.0009	0	80.93	8.6e-07	K	LNDLEEALQQAK	E
7	1::sp|cRAP053|P35908|K22E_HUMAN	Keratin, type II cytoskeletal 2 epidermal OS=Homo sapiens GN=KRT2 PE=1 SV=2	1798	65678	37	37	30	30	50.2	639	MSCQISCKSRGRGGGGGGFRGFSSGSAVVSGGSRRSTSSFSCLSRHGGGGGGFGGGGFGSRSLVGLGGTKSISISVAGGGGGFGAAGGFGGRGGGFGGGSSFGGGSGFSGGGFGGGGFGGGRFGGFGGPGGVGGLGGPGGFGPGGYPGGIHEVSVNQSLLQPLNVKVDPEIQNVKAQEREQIKTLNNKFASFIDKVRFLEQQNQVLQTKWELLQQMNVGTRPINLEPIFQGYIDSLKRYLDGLTAERTSQNSELNNMQDLVEDYKKKYEDEINKRTAAENDFVTLKKDVDNAYMIKVELQSKVDLLNQEIEFLKVLYDAEISQIHQSVTDTNVILSMDNSRNLDLDSIIAEVKAQYEEIAQRSKEEAEALYHSKYEELQVTVGRHGDSLKEIKIEISEL…	2727	1859	1	1	1	464.565	1390.67	3	1390.67	0.0001	1	50.98	0.0012	R	SKEEAEALYHSK	Y
7	1::sp|cRAP053|P35908|K22E_HUMAN	Keratin, type II cytoskeletal 2 epidermal OS=Homo sapiens GN=KRT2 PE=1 SV=2	1798	65678	37	37	30	30	50.2	639	MSCQISCKSRGRGGGGGGFRGFSSGSAVVSGGSRRSTSSFSCLSRHGGGGGGFGGGGFGSRSLVGLGGTKSISISVAGGGGGFGAAGGFGGRGGGFGGGSSFGGGSGFSGGGFGGGGFGGGRFGGFGGPGGVGGLGGPGGFGPGGYPGGIHEVSVNQSLLQPLNVKVDPEIQNVKAQEREQIKTLNNKFASFIDKVRFLEQQNQVLQTKWELLQQMNVGTRPINLEPIFQGYIDSLKRYLDGLTAERTSQNSELNNMQDLVEDYKKKYEDEINKRTAAENDFVTLKKDVDNAYMIKVELQSKVDLLNQEIEFLKVLYDAEISQIHQSVTDTNVILSMDNSRNLDLDSIIAEVKAQYEEIAQRSKEEAEALYHSKYEELQVTVGRHGDSLKEIKIEISEL…	3089	7043	1	1	1	730.903	1459.79	2	1459.79	-0.0016	0	112.14	6.4e-10	K	VDLLNQEIEFLK	V
7	1::sp|cRAP053|P35908|K22E_HUMAN	Keratin, type II cytoskeletal 2 epidermal OS=Homo sapiens GN=KRT2 PE=1 SV=2	1798	65678	37	37	30	30	50.2	639	MSCQISCKSRGRGGGGGGFRGFSSGSAVVSGGSRRSTSSFSCLSRHGGGGGGFGGGGFGSRSLVGLGGTKSISISVAGGGGGFGAAGGFGGRGGGFGGGSSFGGGSGFSGGGFGGGGFGGGRFGGFGGPGGVGGLGGPGGFGPGGYPGGIHEVSVNQSLLQPLNVKVDPEIQNVKAQEREQIKTLNNKFASFIDKVRFLEQQNQVLQTKWELLQQMNVGTRPINLEPIFQGYIDSLKRYLDGLTAERTSQNSELNNMQDLVEDYKKKYEDEINKRTAAENDFVTLKKDVDNAYMIKVELQSKVDLLNQEIEFLKVLYDAEISQIHQSVTDTNVILSMDNSRNLDLDSIIAEVKAQYEEIAQRSKEEAEALYHSKYEELQVTVGRHGDSLKEIKIEISEL…	3163	3566	1	0	0	738.396	1474.78	2	1474.78	-0.0008	0	91.56	8.5e-08	R	FLEQQNQVLQTK	W
7	1::sp|cRAP053|P35908|K22E_HUMAN	Keratin, type II cytoskeletal 2 epidermal OS=Homo sapiens GN=KRT2 PE=1 SV=2	1798	65678	37	37	30	30	50.2	639	MSCQISCKSRGRGGGGGGFRGFSSGSAVVSGGSRRSTSSFSCLSRHGGGGGGFGGGGFGSRSLVGLGGTKSISISVAGGGGGFGAAGGFGGRGGGFGGGSSFGGGSGFSGGGFGGGGFGGGRFGGFGGPGGVGGLGGPGGFGPGGYPGGIHEVSVNQSLLQPLNVKVDPEIQNVKAQEREQIKTLNNKFASFIDKVRFLEQQNQVLQTKWELLQQMNVGTRPINLEPIFQGYIDSLKRYLDGLTAERTSQNSELNNMQDLVEDYKKKYEDEINKRTAAENDFVTLKKDVDNAYMIKVELQSKVDLLNQEIEFLKVLYDAEISQIHQSVTDTNVILSMDNSRNLDLDSIIAEVKAQYEEIAQRSKEEAEALYHSKYEELQVTVGRHGDSLKEIKIEISEL…	3164	3703	1	0	0	738.396	1474.78	2	1474.78	0.0003	0	79.63	1.3e-06	R	FLEQQNQVLQTK	W
7	1::sp|cRAP053|P35908|K22E_HUMAN	Keratin, type II cytoskeletal 2 epidermal OS=Homo sapiens GN=KRT2 PE=1 SV=2	1798	65678	37	37	30	30	50.2	639	MSCQISCKSRGRGGGGGGFRGFSSGSAVVSGGSRRSTSSFSCLSRHGGGGGGFGGGGFGSRSLVGLGGTKSISISVAGGGGGFGAAGGFGGRGGGFGGGSSFGGGSGFSGGGFGGGGFGGGRFGGFGGPGGVGGLGGPGGFGPGGYPGGIHEVSVNQSLLQPLNVKVDPEIQNVKAQEREQIKTLNNKFASFIDKVRFLEQQNQVLQTKWELLQQMNVGTRPINLEPIFQGYIDSLKRYLDGLTAERTSQNSELNNMQDLVEDYKKKYEDEINKRTAAENDFVTLKKDVDNAYMIKVELQSKVDLLNQEIEFLKVLYDAEISQIHQSVTDTNVILSMDNSRNLDLDSIIAEVKAQYEEIAQRSKEEAEALYHSKYEELQVTVGRHGDSLKEIKIEISEL…	3174	3842	1	0	0	738.89	1475.77	2	1475.76	0.0041	0	91.81	8.6e-08	R	FLEQQNQVLQTK	W
7	1::sp|cRAP053|P35908|K22E_HUMAN	Keratin, type II cytoskeletal 2 epidermal OS=Homo sapiens GN=KRT2 PE=1 SV=2	1798	65678	37	37	30	30	50.2	639	MSCQISCKSRGRGGGGGGFRGFSSGSAVVSGGSRRSTSSFSCLSRHGGGGGGFGGGGFGSRSLVGLGGTKSISISVAGGGGGFGAAGGFGGRGGGFGGGSSFGGGSGFSGGGFGGGGFGGGRFGGFGGPGGVGGLGGPGGFGPGGYPGGIHEVSVNQSLLQPLNVKVDPEIQNVKAQEREQIKTLNNKFASFIDKVRFLEQQNQVLQTKWELLQQMNVGTRPINLEPIFQGYIDSLKRYLDGLTAERTSQNSELNNMQDLVEDYKKKYEDEINKRTAAENDFVTLKKDVDNAYMIKVELQSKVDLLNQEIEFLKVLYDAEISQIHQSVTDTNVILSMDNSRNLDLDSIIAEVKAQYEEIAQRSKEEAEALYHSKYEELQVTVGRHGDSLKEIKIEISEL…	4403	1372	1	1	1	870.856	1739.7	2	1739.7	-0.0013	0	115.68	4.7e-11	R	GSSSGGGYSSGSSSYGSGGR	Q
7	1::sp|cRAP053|P35908|K22E_HUMAN	Keratin, type II cytoskeletal 2 epidermal OS=Homo sapiens GN=KRT2 PE=1 SV=2	1798	65678	37	37	30	30	50.2	639	MSCQISCKSRGRGGGGGGFRGFSSGSAVVSGGSRRSTSSFSCLSRHGGGGGGFGGGGFGSRSLVGLGGTKSISISVAGGGGGFGAAGGFGGRGGGFGGGSSFGGGSGFSGGGFGGGGFGGGRFGGFGGPGGVGGLGGPGGFGPGGYPGGIHEVSVNQSLLQPLNVKVDPEIQNVKAQEREQIKTLNNKFASFIDKVRFLEQQNQVLQTKWELLQQMNVGTRPINLEPIFQGYIDSLKRYLDGLTAERTSQNSELNNMQDLVEDYKKKYEDEINKRTAAENDFVTLKKDVDNAYMIKVELQSKVDLLNQEIEFLKVLYDAEISQIHQSVTDTNVILSMDNSRNLDLDSIIAEVKAQYEEIAQRSKEEAEALYHSKYEELQVTVGRHGDSLKEIKIEISEL…	4408	1862	1	1	1	871.377	1740.74	2	1740.74	-0.0015	0	60.56	4.5e-05	R	GGSGGGGSISGGGYGSGGGSGGR	Y
7	1::sp|cRAP053|P35908|K22E_HUMAN	Keratin, type II cytoskeletal 2 epidermal OS=Homo sapiens GN=KRT2 PE=1 SV=2	1798	65678	37	37	30	30	50.2	639	MSCQISCKSRGRGGGGGGFRGFSSGSAVVSGGSRRSTSSFSCLSRHGGGGGGFGGGGFGSRSLVGLGGTKSISISVAGGGGGFGAAGGFGGRGGGFGGGSSFGGGSGFSGGGFGGGGFGGGRFGGFGGPGGVGGLGGPGGFGPGGYPGGIHEVSVNQSLLQPLNVKVDPEIQNVKAQEREQIKTLNNKFASFIDKVRFLEQQNQVLQTKWELLQQMNVGTRPINLEPIFQGYIDSLKRYLDGLTAERTSQNSELNNMQDLVEDYKKKYEDEINKRTAAENDFVTLKKDVDNAYMIKVELQSKVDLLNQEIEFLKVLYDAEISQIHQSVTDTNVILSMDNSRNLDLDSIIAEVKAQYEEIAQRSKEEAEALYHSKYEELQVTVGRHGDSLKEIKIEISEL…	5979	4822	1	1	1	752.686	2255.04	3	2255.04	-0.0018	1	110.87	1.1e-09	R	TSQNSELNNMQDLVEDYKK	K
7	1::sp|cRAP053|P35908|K22E_HUMAN	Keratin, type II cytoskeletal 2 epidermal OS=Homo sapiens GN=KRT2 PE=1 SV=2	1798	65678	37	37	30	30	50.2	639	MSCQISCKSRGRGGGGGGFRGFSSGSAVVSGGSRRSTSSFSCLSRHGGGGGGFGGGGFGSRSLVGLGGTKSISISVAGGGGGFGAAGGFGGRGGGFGGGSSFGGGSGFSGGGFGGGGFGGGRFGGFGGPGGVGGLGGPGGFGPGGYPGGIHEVSVNQSLLQPLNVKVDPEIQNVKAQEREQIKTLNNKFASFIDKVRFLEQQNQVLQTKWELLQQMNVGTRPINLEPIFQGYIDSLKRYLDGLTAERTSQNSELNNMQDLVEDYKKKYEDEINKRTAAENDFVTLKKDVDNAYMIKVELQSKVDLLNQEIEFLKVLYDAEISQIHQSVTDTNVILSMDNSRNLDLDSIIAEVKAQYEEIAQRSKEEAEALYHSKYEELQVTVGRHGDSLKEIKIEISEL…	6032	3053	1	1	1	758.353	2272.04	3	2272.02	0.0195	1	55.27	0.00035	R	TSQNSELNNMQDLVEDYKK	K
7	1::sp|cRAP053|P35908|K22E_HUMAN	Keratin, type II cytoskeletal 2 epidermal OS=Homo sapiens GN=KRT2 PE=1 SV=2	1798	65678	37	37	30	30	50.2	639	MSCQISCKSRGRGGGGGGFRGFSSGSAVVSGGSRRSTSSFSCLSRHGGGGGGFGGGGFGSRSLVGLGGTKSISISVAGGGGGFGAAGGFGGRGGGFGGGSSFGGGSGFSGGGFGGGGFGGGRFGGFGGPGGVGGLGGPGGFGPGGYPGGIHEVSVNQSLLQPLNVKVDPEIQNVKAQEREQIKTLNNKFASFIDKVRFLEQQNQVLQTKWELLQQMNVGTRPINLEPIFQGYIDSLKRYLDGLTAERTSQNSELNNMQDLVEDYKKKYEDEINKRTAAENDFVTLKKDVDNAYMIKVELQSKVDLLNQEIEFLKVLYDAEISQIHQSVTDTNVILSMDNSRNLDLDSIIAEVKAQYEEIAQRSKEEAEALYHSKYEELQVTVGRHGDSLKEIKIEISEL…	6697	2389	1	1	1	834.693	2501.06	3	2501.04	0.0143	1	45.21	0.0015	K	AAFGGSGGRGSSSGGGYSSGSSSYGSGGR	Q
7	1::sp|cRAP053|P35908|K22E_HUMAN	Keratin, type II cytoskeletal 2 epidermal OS=Homo sapiens GN=KRT2 PE=1 SV=2	1798	65678	37	37	30	30	50.2	639	MSCQISCKSRGRGGGGGGFRGFSSGSAVVSGGSRRSTSSFSCLSRHGGGGGGFGGGGFGSRSLVGLGGTKSISISVAGGGGGFGAAGGFGGRGGGFGGGSSFGGGSGFSGGGFGGGGFGGGRFGGFGGPGGVGGLGGPGGFGPGGYPGGIHEVSVNQSLLQPLNVKVDPEIQNVKAQEREQIKTLNNKFASFIDKVRFLEQQNQVLQTKWELLQQMNVGTRPINLEPIFQGYIDSLKRYLDGLTAERTSQNSELNNMQDLVEDYKKKYEDEINKRTAAENDFVTLKKDVDNAYMIKVELQSKVDLLNQEIEFLKVLYDAEISQIHQSVTDTNVILSMDNSRNLDLDSIIAEVKAQYEEIAQRSKEEAEALYHSKYEELQVTVGRHGDSLKEIKIEISEL…	7710	6328	1	1	1	1016.84	3047.49	3	3047.49	-0.0013	0	55.55	0.00048	K	VLYDAEISQIHQSVTDTNVILSMDNSR	N
7	1::sp|cRAP053|P35908|K22E_HUMAN	Keratin, type II cytoskeletal 2 epidermal OS=Homo sapiens GN=KRT2 PE=1 SV=2	1798	65678	37	37	30	30	50.2	639	MSCQISCKSRGRGGGGGGFRGFSSGSAVVSGGSRRSTSSFSCLSRHGGGGGGFGGGGFGSRSLVGLGGTKSISISVAGGGGGFGAAGGFGGRGGGFGGGSSFGGGSGFSGGGFGGGGFGGGRFGGFGGPGGVGGLGGPGGFGPGGYPGGIHEVSVNQSLLQPLNVKVDPEIQNVKAQEREQIKTLNNKFASFIDKVRFLEQQNQVLQTKWELLQQMNVGTRPINLEPIFQGYIDSLKRYLDGLTAERTSQNSELNNMQDLVEDYKKKYEDEINKRTAAENDFVTLKKDVDNAYMIKVELQSKVDLLNQEIEFLKVLYDAEISQIHQSVTDTNVILSMDNSRNLDLDSIIAEVKAQYEEIAQRSKEEAEALYHSKYEELQVTVGRHGDSLKEIKIEISEL…	7733	5858	1	1	1	1022.17	3063.48	3	3063.48	-0.0018	0	49.97	0.0018	K	VLYDAEISQIHQSVTDTNVILSMDNSR	N
8	2::tr|A0A151N5S7|A0A151N5S7_ALLMI	Serum albumin OS=Alligator mississippiensis OX=8496 GN=ALB PE=4 SV=1	1711	72062	49	49	32	32	53.3	615	MKWVALISLIFLFSSATSRNLKRSAREAEHKSEIAHRFSDLKETTFKEVALITFAQYLQKCPFDELAKLVKDVVDLAHKCVDNEDAAECTKSLPAIFLDEICGVPALRDMYGSMADCCAKDDPERNECFLTFKINNPPFIQPYQRPEPAVLCKDFTDNKQSFLEHYLYRVARKAPFLYAPAILALGADYEHAVEACCAETDIGTCLDEKMSAIKEKAKKLNSRQVYACGILKKFGERVFQAERLAFISQKYPKAPFAEVHKIVQDLKGIYKECCDGDMVECMDDRAELMTYICSKEEAISSKIHHCCEKPVVERSQCIIEADFDDKPADLPPIGDKYIHNPDVCKCLEAGHDAFLAEFLYEYSRRHPEFSTQTCLRIAKLYEDTLEKCCKTENPSECYA…	17	729	1	1	1	382.195	762.375	2	762.376	-0.0008	0	55.66	7.9e-05	K	EEAISSK	I
8	2::tr|A0A151N5S7|A0A151N5S7_ALLMI	Serum albumin OS=Alligator mississippiensis OX=8496 GN=ALB PE=4 SV=1	1711	72062	49	49	32	32	53.3	615	MKWVALISLIFLFSSATSRNLKRSAREAEHKSEIAHRFSDLKETTFKEVALITFAQYLQKCPFDELAKLVKDVVDLAHKCVDNEDAAECTKSLPAIFLDEICGVPALRDMYGSMADCCAKDDPERNECFLTFKINNPPFIQPYQRPEPAVLCKDFTDNKQSFLEHYLYRVARKAPFLYAPAILALGADYEHAVEACCAETDIGTCLDEKMSAIKEKAKKLNSRQVYACGILKKFGERVFQAERLAFISQKYPKAPFAEVHKIVQDLKGIYKECCDGDMVECMDDRAELMTYICSKEEAISSKIHHCCEKPVVERSQCIIEADFDDKPADLPPIGDKYIHNPDVCKCLEAGHDAFLAEFLYEYSRRHPEFSTQTCLRIAKLYEDTLEKCCKTENPSECYA…	151	3627	1	1	1	403.742	805.469	2	805.47	-0.0004	0	32.75	0.0084	R	LAFISQK	Y
8	2::tr|A0A151N5S7|A0A151N5S7_ALLMI	Serum albumin OS=Alligator mississippiensis OX=8496 GN=ALB PE=4 SV=1	1711	72062	49	49	32	32	53.3	615	MKWVALISLIFLFSSATSRNLKRSAREAEHKSEIAHRFSDLKETTFKEVALITFAQYLQKCPFDELAKLVKDVVDLAHKCVDNEDAAECTKSLPAIFLDEICGVPALRDMYGSMADCCAKDDPERNECFLTFKINNPPFIQPYQRPEPAVLCKDFTDNKQSFLEHYLYRVARKAPFLYAPAILALGADYEHAVEACCAETDIGTCLDEKMSAIKEKAKKLNSRQVYACGILKKFGERVFQAERLAFISQKYPKAPFAEVHKIVQDLKGIYKECCDGDMVECMDDRAELMTYICSKEEAISSKIHHCCEKPVVERSQCIIEADFDDKPADLPPIGDKYIHNPDVCKCLEAGHDAFLAEFLYEYSRRHPEFSTQTCLRIAKLYEDTLEKCCKTENPSECYA…	152	3780	1	1	1	403.742	805.47	2	805.47	-0.0001	0	20.29	0.15	R	LAFISQK	Y
8	2::tr|A0A151N5S7|A0A151N5S7_ALLMI	Serum albumin OS=Alligator mississippiensis OX=8496 GN=ALB PE=4 SV=1	1711	72062	49	49	32	32	53.3	615	MKWVALISLIFLFSSATSRNLKRSAREAEHKSEIAHRFSDLKETTFKEVALITFAQYLQKCPFDELAKLVKDVVDLAHKCVDNEDAAECTKSLPAIFLDEICGVPALRDMYGSMADCCAKDDPERNECFLTFKINNPPFIQPYQRPEPAVLCKDFTDNKQSFLEHYLYRVARKAPFLYAPAILALGADYEHAVEACCAETDIGTCLDEKMSAIKEKAKKLNSRQVYACGILKKFGERVFQAERLAFISQKYPKAPFAEVHKIVQDLKGIYKECCDGDMVECMDDRAELMTYICSKEEAISSKIHHCCEKPVVERSQCIIEADFDDKPADLPPIGDKYIHNPDVCKCLEAGHDAFLAEFLYEYSRRHPEFSTQTCLRIAKLYEDTLEKCCKTENPSECYA…	477	2438	1	1	1	448.745	895.476	2	895.476	-0.0008	0	31.79	0.033	K	DVVDLAHK	C
8	2::tr|A0A151N5S7|A0A151N5S7_ALLMI	Serum albumin OS=Alligator mississippiensis OX=8496 GN=ALB PE=4 SV=1	1711	72062	49	49	32	32	53.3	615	MKWVALISLIFLFSSATSRNLKRSAREAEHKSEIAHRFSDLKETTFKEVALITFAQYLQKCPFDELAKLVKDVVDLAHKCVDNEDAAECTKSLPAIFLDEICGVPALRDMYGSMADCCAKDDPERNECFLTFKINNPPFIQPYQRPEPAVLCKDFTDNKQSFLEHYLYRVARKAPFLYAPAILALGADYEHAVEACCAETDIGTCLDEKMSAIKEKAKKLNSRQVYACGILKKFGERVFQAERLAFISQKYPKAPFAEVHKIVQDLKGIYKECCDGDMVECMDDRAELMTYICSKEEAISSKIHHCCEKPVVERSQCIIEADFDDKPADLPPIGDKYIHNPDVCKCLEAGHDAFLAEFLYEYSRRHPEFSTQTCLRIAKLYEDTLEKCCKTENPSECYA…	485	1786	1	1	1	449.743	897.47	2	897.471	-0.0005	0	43.1	0.0021	K	APFAEVHK	I
8	2::tr|A0A151N5S7|A0A151N5S7_ALLMI	Serum albumin OS=Alligator mississippiensis OX=8496 GN=ALB PE=4 SV=1	1711	72062	49	49	32	32	53.3	615	MKWVALISLIFLFSSATSRNLKRSAREAEHKSEIAHRFSDLKETTFKEVALITFAQYLQKCPFDELAKLVKDVVDLAHKCVDNEDAAECTKSLPAIFLDEICGVPALRDMYGSMADCCAKDDPERNECFLTFKINNPPFIQPYQRPEPAVLCKDFTDNKQSFLEHYLYRVARKAPFLYAPAILALGADYEHAVEACCAETDIGTCLDEKMSAIKEKAKKLNSRQVYACGILKKFGERVFQAERLAFISQKYPKAPFAEVHKIVQDLKGIYKECCDGDMVECMDDRAELMTYICSKEEAISSKIHHCCEKPVVERSQCIIEADFDDKPADLPPIGDKYIHNPDVCKCLEAGHDAFLAEFLYEYSRRHPEFSTQTCLRIAKLYEDTLEKCCKTENPSECYA…	826	3927	1	1	1	490.231	978.448	2	978.448	-0.0003	0	50.4	0.00074	K	CPFDELAK	L
8	2::tr|A0A151N5S7|A0A151N5S7_ALLMI	Serum albumin OS=Alligator mississippiensis OX=8496 GN=ALB PE=4 SV=1	1711	72062	49	49	32	32	53.3	615	MKWVALISLIFLFSSATSRNLKRSAREAEHKSEIAHRFSDLKETTFKEVALITFAQYLQKCPFDELAKLVKDVVDLAHKCVDNEDAAECTKSLPAIFLDEICGVPALRDMYGSMADCCAKDDPERNECFLTFKINNPPFIQPYQRPEPAVLCKDFTDNKQSFLEHYLYRVARKAPFLYAPAILALGADYEHAVEACCAETDIGTCLDEKMSAIKEKAKKLNSRQVYACGILKKFGERVFQAERLAFISQKYPKAPFAEVHKIVQDLKGIYKECCDGDMVECMDDRAELMTYICSKEEAISSKIHHCCEKPVVERSQCIIEADFDDKPADLPPIGDKYIHNPDVCKCLEAGHDAFLAEFLYEYSRRHPEFSTQTCLRIAKLYEDTLEKCCKTENPSECYA…	979	2866	1	1	1	505.756	1009.5	2	1009.5	0.0003	0	55.64	0.00018	K	LYEDTLEK	C
8	2::tr|A0A151N5S7|A0A151N5S7_ALLMI	Serum albumin OS=Alligator mississippiensis OX=8496 GN=ALB PE=4 SV=1	1711	72062	49	49	32	32	53.3	615	MKWVALISLIFLFSSATSRNLKRSAREAEHKSEIAHRFSDLKETTFKEVALITFAQYLQKCPFDELAKLVKDVVDLAHKCVDNEDAAECTKSLPAIFLDEICGVPALRDMYGSMADCCAKDDPERNECFLTFKINNPPFIQPYQRPEPAVLCKDFTDNKQSFLEHYLYRVARKAPFLYAPAILALGADYEHAVEACCAETDIGTCLDEKMSAIKEKAKKLNSRQVYACGILKKFGERVFQAERLAFISQKYPKAPFAEVHKIVQDLKGIYKECCDGDMVECMDDRAELMTYICSKEEAISSKIHHCCEKPVVERSQCIIEADFDDKPADLPPIGDKYIHNPDVCKCLEAGHDAFLAEFLYEYSRRHPEFSTQTCLRIAKLYEDTLEKCCKTENPSECYA…	980	3003	1	1	1	505.756	1009.5	2	1009.5	0.0005	0	33.36	0.031	K	LYEDTLEK	C
8	2::tr|A0A151N5S7|A0A151N5S7_ALLMI	Serum albumin OS=Alligator mississippiensis OX=8496 GN=ALB PE=4 SV=1	1711	72062	49	49	32	32	53.3	615	MKWVALISLIFLFSSATSRNLKRSAREAEHKSEIAHRFSDLKETTFKEVALITFAQYLQKCPFDELAKLVKDVVDLAHKCVDNEDAAECTKSLPAIFLDEICGVPALRDMYGSMADCCAKDDPERNECFLTFKINNPPFIQPYQRPEPAVLCKDFTDNKQSFLEHYLYRVARKAPFLYAPAILALGADYEHAVEACCAETDIGTCLDEKMSAIKEKAKKLNSRQVYACGILKKFGERVFQAERLAFISQKYPKAPFAEVHKIVQDLKGIYKECCDGDMVECMDDRAELMTYICSKEEAISSKIHHCCEKPVVERSQCIIEADFDDKPADLPPIGDKYIHNPDVCKCLEAGHDAFLAEFLYEYSRRHPEFSTQTCLRIAKLYEDTLEKCCKTENPSECYA…	1017	1795	1	1	1	509.747	1017.48	2	1017.48	-0.0001	0	47.89	0.0016	K	LCSAPEDVK	Q
8	2::tr|A0A151N5S7|A0A151N5S7_ALLMI	Serum albumin OS=Alligator mississippiensis OX=8496 GN=ALB PE=4 SV=1	1711	72062	49	49	32	32	53.3	615	MKWVALISLIFLFSSATSRNLKRSAREAEHKSEIAHRFSDLKETTFKEVALITFAQYLQKCPFDELAKLVKDVVDLAHKCVDNEDAAECTKSLPAIFLDEICGVPALRDMYGSMADCCAKDDPERNECFLTFKINNPPFIQPYQRPEPAVLCKDFTDNKQSFLEHYLYRVARKAPFLYAPAILALGADYEHAVEACCAETDIGTCLDEKMSAIKEKAKKLNSRQVYACGILKKFGERVFQAERLAFISQKYPKAPFAEVHKIVQDLKGIYKECCDGDMVECMDDRAELMTYICSKEEAISSKIHHCCEKPVVERSQCIIEADFDDKPADLPPIGDKYIHNPDVCKCLEAGHDAFLAEFLYEYSRRHPEFSTQTCLRIAKLYEDTLEKCCKTENPSECYA…	1170	5043	1	1	1	529.752	1057.49	2	1057.49	-0.0001	0	42.5	0.0029	R	NECFLTFK	I
8	2::tr|A0A151N5S7|A0A151N5S7_ALLMI	Serum albumin OS=Alligator mississippiensis OX=8496 GN=ALB PE=4 SV=1	1711	72062	49	49	32	32	53.3	615	MKWVALISLIFLFSSATSRNLKRSAREAEHKSEIAHRFSDLKETTFKEVALITFAQYLQKCPFDELAKLVKDVVDLAHKCVDNEDAAECTKSLPAIFLDEICGVPALRDMYGSMADCCAKDDPERNECFLTFKINNPPFIQPYQRPEPAVLCKDFTDNKQSFLEHYLYRVARKAPFLYAPAILALGADYEHAVEACCAETDIGTCLDEKMSAIKEKAKKLNSRQVYACGILKKFGERVFQAERLAFISQKYPKAPFAEVHKIVQDLKGIYKECCDGDMVECMDDRAELMTYICSKEEAISSKIHHCCEKPVVERSQCIIEADFDDKPADLPPIGDKYIHNPDVCKCLEAGHDAFLAEFLYEYSRRHPEFSTQTCLRIAKLYEDTLEKCCKTENPSECYA…	1441	3987	1	1	1	563.284	1124.55	2	1124.55	-0.0007	0	82.87	4.3e-07	K	ITAGFSGMVDK	C
8	2::tr|A0A151N5S7|A0A151N5S7_ALLMI	Serum albumin OS=Alligator mississippiensis OX=8496 GN=ALB PE=4 SV=1	1711	72062	49	49	32	32	53.3	615	MKWVALISLIFLFSSATSRNLKRSAREAEHKSEIAHRFSDLKETTFKEVALITFAQYLQKCPFDELAKLVKDVVDLAHKCVDNEDAAECTKSLPAIFLDEICGVPALRDMYGSMADCCAKDDPERNECFLTFKINNPPFIQPYQRPEPAVLCKDFTDNKQSFLEHYLYRVARKAPFLYAPAILALGADYEHAVEACCAETDIGTCLDEKMSAIKEKAKKLNSRQVYACGILKKFGERVFQAERLAFISQKYPKAPFAEVHKIVQDLKGIYKECCDGDMVECMDDRAELMTYICSKEEAISSKIHHCCEKPVVERSQCIIEADFDDKPADLPPIGDKYIHNPDVCKCLEAGHDAFLAEFLYEYSRRHPEFSTQTCLRIAKLYEDTLEKCCKTENPSECYA…	1518	4010	1	1	1	571.282	1140.55	2	1140.55	0.0002	0	29.42	0.087	K	ITAGFSGMVDK	C
8	2::tr|A0A151N5S7|A0A151N5S7_ALLMI	Serum albumin OS=Alligator mississippiensis OX=8496 GN=ALB PE=4 SV=1	1711	72062	49	49	32	32	53.3	615	MKWVALISLIFLFSSATSRNLKRSAREAEHKSEIAHRFSDLKETTFKEVALITFAQYLQKCPFDELAKLVKDVVDLAHKCVDNEDAAECTKSLPAIFLDEICGVPALRDMYGSMADCCAKDDPERNECFLTFKINNPPFIQPYQRPEPAVLCKDFTDNKQSFLEHYLYRVARKAPFLYAPAILALGADYEHAVEACCAETDIGTCLDEKMSAIKEKAKKLNSRQVYACGILKKFGERVFQAERLAFISQKYPKAPFAEVHKIVQDLKGIYKECCDGDMVECMDDRAELMTYICSKEEAISSKIHHCCEKPVVERSQCIIEADFDDKPADLPPIGDKYIHNPDVCKCLEAGHDAFLAEFLYEYSRRHPEFSTQTCLRIAKLYEDTLEKCCKTENPSECYA…	1540	1458	1	1	1	382.518	1144.53	3	1144.53	-0.0011	0	36.25	0.015	K	YIHNPDVCK	C
8	2::tr|A0A151N5S7|A0A151N5S7_ALLMI	Serum albumin OS=Alligator mississippiensis OX=8496 GN=ALB PE=4 SV=1	1711	72062	49	49	32	32	53.3	615	MKWVALISLIFLFSSATSRNLKRSAREAEHKSEIAHRFSDLKETTFKEVALITFAQYLQKCPFDELAKLVKDVVDLAHKCVDNEDAAECTKSLPAIFLDEICGVPALRDMYGSMADCCAKDDPERNECFLTFKINNPPFIQPYQRPEPAVLCKDFTDNKQSFLEHYLYRVARKAPFLYAPAILALGADYEHAVEACCAETDIGTCLDEKMSAIKEKAKKLNSRQVYACGILKKFGERVFQAERLAFISQKYPKAPFAEVHKIVQDLKGIYKECCDGDMVECMDDRAELMTYICSKEEAISSKIHHCCEKPVVERSQCIIEADFDDKPADLPPIGDKYIHNPDVCKCLEAGHDAFLAEFLYEYSRRHPEFSTQTCLRIAKLYEDTLEKCCKTENPSECYA…	1541	1579	1	1	1	382.518	1144.53	3	1144.53	-0.0007	0	44.65	0.0022	K	YIHNPDVCK	C
8	2::tr|A0A151N5S7|A0A151N5S7_ALLMI	Serum albumin OS=Alligator mississippiensis OX=8496 GN=ALB PE=4 SV=1	1711	72062	49	49	32	32	53.3	615	MKWVALISLIFLFSSATSRNLKRSAREAEHKSEIAHRFSDLKETTFKEVALITFAQYLQKCPFDELAKLVKDVVDLAHKCVDNEDAAECTKSLPAIFLDEICGVPALRDMYGSMADCCAKDDPERNECFLTFKINNPPFIQPYQRPEPAVLCKDFTDNKQSFLEHYLYRVARKAPFLYAPAILALGADYEHAVEACCAETDIGTCLDEKMSAIKEKAKKLNSRQVYACGILKKFGERVFQAERLAFISQKYPKAPFAEVHKIVQDLKGIYKECCDGDMVECMDDRAELMTYICSKEEAISSKIHHCCEKPVVERSQCIIEADFDDKPADLPPIGDKYIHNPDVCKCLEAGHDAFLAEFLYEYSRRHPEFSTQTCLRIAKLYEDTLEKCCKTENPSECYA…	1542	1513	1	1	1	573.274	1144.53	2	1144.53	-0.0006	0	36.37	0.015	K	YIHNPDVCK	C
8	2::tr|A0A151N5S7|A0A151N5S7_ALLMI	Serum albumin OS=Alligator mississippiensis OX=8496 GN=ALB PE=4 SV=1	1711	72062	49	49	32	32	53.3	615	MKWVALISLIFLFSSATSRNLKRSAREAEHKSEIAHRFSDLKETTFKEVALITFAQYLQKCPFDELAKLVKDVVDLAHKCVDNEDAAECTKSLPAIFLDEICGVPALRDMYGSMADCCAKDDPERNECFLTFKINNPPFIQPYQRPEPAVLCKDFTDNKQSFLEHYLYRVARKAPFLYAPAILALGADYEHAVEACCAETDIGTCLDEKMSAIKEKAKKLNSRQVYACGILKKFGERVFQAERLAFISQKYPKAPFAEVHKIVQDLKGIYKECCDGDMVECMDDRAELMTYICSKEEAISSKIHHCCEKPVVERSQCIIEADFDDKPADLPPIGDKYIHNPDVCKCLEAGHDAFLAEFLYEYSRRHPEFSTQTCLRIAKLYEDTLEKCCKTENPSECYA…	1773	1576	1	1	1	599.755	1197.49	2	1197.5	-0.0028	0	21.74	0.2	K	TENPSECYAK	V
8	2::tr|A0A151N5S7|A0A151N5S7_ALLMI	Serum albumin OS=Alligator mississippiensis OX=8496 GN=ALB PE=4 SV=1	1711	72062	49	49	32	32	53.3	615	MKWVALISLIFLFSSATSRNLKRSAREAEHKSEIAHRFSDLKETTFKEVALITFAQYLQKCPFDELAKLVKDVVDLAHKCVDNEDAAECTKSLPAIFLDEICGVPALRDMYGSMADCCAKDDPERNECFLTFKINNPPFIQPYQRPEPAVLCKDFTDNKQSFLEHYLYRVARKAPFLYAPAILALGADYEHAVEACCAETDIGTCLDEKMSAIKEKAKKLNSRQVYACGILKKFGERVFQAERLAFISQKYPKAPFAEVHKIVQDLKGIYKECCDGDMVECMDDRAELMTYICSKEEAISSKIHHCCEKPVVERSQCIIEADFDDKPADLPPIGDKYIHNPDVCKCLEAGHDAFLAEFLYEYSRRHPEFSTQTCLRIAKLYEDTLEKCCKTENPSECYA…	1774	1455	1	1	1	599.756	1197.5	2	1197.5	-0.0004	0	46.29	0.00073	K	TENPSECYAK	V
8	2::tr|A0A151N5S7|A0A151N5S7_ALLMI	Serum albumin OS=Alligator mississippiensis OX=8496 GN=ALB PE=4 SV=1	1711	72062	49	49	32	32	53.3	615	MKWVALISLIFLFSSATSRNLKRSAREAEHKSEIAHRFSDLKETTFKEVALITFAQYLQKCPFDELAKLVKDVVDLAHKCVDNEDAAECTKSLPAIFLDEICGVPALRDMYGSMADCCAKDDPERNECFLTFKINNPPFIQPYQRPEPAVLCKDFTDNKQSFLEHYLYRVARKAPFLYAPAILALGADYEHAVEACCAETDIGTCLDEKMSAIKEKAKKLNSRQVYACGILKKFGERVFQAERLAFISQKYPKAPFAEVHKIVQDLKGIYKECCDGDMVECMDDRAELMTYICSKEEAISSKIHHCCEKPVVERSQCIIEADFDDKPADLPPIGDKYIHNPDVCKCLEAGHDAFLAEFLYEYSRRHPEFSTQTCLRIAKLYEDTLEKCCKTENPSECYA…	1862	4679	1	1	1	608.291	1214.57	2	1214.57	-0.0006	0	56.73	0.00015	R	AELMTYICSK	E
8	2::tr|A0A151N5S7|A0A151N5S7_ALLMI	Serum albumin OS=Alligator mississippiensis OX=8496 GN=ALB PE=4 SV=1	1711	72062	49	49	32	32	53.3	615	MKWVALISLIFLFSSATSRNLKRSAREAEHKSEIAHRFSDLKETTFKEVALITFAQYLQKCPFDELAKLVKDVVDLAHKCVDNEDAAECTKSLPAIFLDEICGVPALRDMYGSMADCCAKDDPERNECFLTFKINNPPFIQPYQRPEPAVLCKDFTDNKQSFLEHYLYRVARKAPFLYAPAILALGADYEHAVEACCAETDIGTCLDEKMSAIKEKAKKLNSRQVYACGILKKFGERVFQAERLAFISQKYPKAPFAEVHKIVQDLKGIYKECCDGDMVECMDDRAELMTYICSKEEAISSKIHHCCEKPVVERSQCIIEADFDDKPADLPPIGDKYIHNPDVCKCLEAGHDAFLAEFLYEYSRRHPEFSTQTCLRIAKLYEDTLEKCCKTENPSECYA…	1863	2978	1	1	1	405.88	1214.62	3	1214.62	0.0001	1	49.02	0.0013	R	FSDLKETTFK	E
8	2::tr|A0A151N5S7|A0A151N5S7_ALLMI	Serum albumin OS=Alligator mississippiensis OX=8496 GN=ALB PE=4 SV=1	1711	72062	49	49	32	32	53.3	615	MKWVALISLIFLFSSATSRNLKRSAREAEHKSEIAHRFSDLKETTFKEVALITFAQYLQKCPFDELAKLVKDVVDLAHKCVDNEDAAECTKSLPAIFLDEICGVPALRDMYGSMADCCAKDDPERNECFLTFKINNPPFIQPYQRPEPAVLCKDFTDNKQSFLEHYLYRVARKAPFLYAPAILALGADYEHAVEACCAETDIGTCLDEKMSAIKEKAKKLNSRQVYACGILKKFGERVFQAERLAFISQKYPKAPFAEVHKIVQDLKGIYKECCDGDMVECMDDRAELMTYICSKEEAISSKIHHCCEKPVVERSQCIIEADFDDKPADLPPIGDKYIHNPDVCKCLEAGHDAFLAEFLYEYSRRHPEFSTQTCLRIAKLYEDTLEKCCKTENPSECYA…	2199	7105	1	1	1	646.366	1290.72	2	1290.72	-0.0009	0	57.02	0.00013	K	NDYSLLINLVK	R
8	2::tr|A0A151N5S7|A0A151N5S7_ALLMI	Serum albumin OS=Alligator mississippiensis OX=8496 GN=ALB PE=4 SV=1	1711	72062	49	49	32	32	53.3	615	MKWVALISLIFLFSSATSRNLKRSAREAEHKSEIAHRFSDLKETTFKEVALITFAQYLQKCPFDELAKLVKDVVDLAHKCVDNEDAAECTKSLPAIFLDEICGVPALRDMYGSMADCCAKDDPERNECFLTFKINNPPFIQPYQRPEPAVLCKDFTDNKQSFLEHYLYRVARKAPFLYAPAILALGADYEHAVEACCAETDIGTCLDEKMSAIKEKAKKLNSRQVYACGILKKFGERVFQAERLAFISQKYPKAPFAEVHKIVQDLKGIYKECCDGDMVECMDDRAELMTYICSKEEAISSKIHHCCEKPVVERSQCIIEADFDDKPADLPPIGDKYIHNPDVCKCLEAGHDAFLAEFLYEYSRRHPEFSTQTCLRIAKLYEDTLEKCCKTENPSECYA…	2248	1864	1	1	1	434.241	1299.7	3	1299.7	-0.0008	0	28.19	0.17	R	KPTITDEQLQK	I
8	2::tr|A0A151N5S7|A0A151N5S7_ALLMI	Serum albumin OS=Alligator mississippiensis OX=8496 GN=ALB PE=4 SV=1	1711	72062	49	49	32	32	53.3	615	MKWVALISLIFLFSSATSRNLKRSAREAEHKSEIAHRFSDLKETTFKEVALITFAQYLQKCPFDELAKLVKDVVDLAHKCVDNEDAAECTKSLPAIFLDEICGVPALRDMYGSMADCCAKDDPERNECFLTFKINNPPFIQPYQRPEPAVLCKDFTDNKQSFLEHYLYRVARKAPFLYAPAILALGADYEHAVEACCAETDIGTCLDEKMSAIKEKAKKLNSRQVYACGILKKFGERVFQAERLAFISQKYPKAPFAEVHKIVQDLKGIYKECCDGDMVECMDDRAELMTYICSKEEAISSKIHHCCEKPVVERSQCIIEADFDDKPADLPPIGDKYIHNPDVCKCLEAGHDAFLAEFLYEYSRRHPEFSTQTCLRIAKLYEDTLEKCCKTENPSECYA…	2249	1788	1	1	1	650.859	1299.7	2	1299.7	0.0001	0	50.03	0.0011	R	KPTITDEQLQK	I
8	2::tr|A0A151N5S7|A0A151N5S7_ALLMI	Serum albumin OS=Alligator mississippiensis OX=8496 GN=ALB PE=4 SV=1	1711	72062	49	49	32	32	53.3	615	MKWVALISLIFLFSSATSRNLKRSAREAEHKSEIAHRFSDLKETTFKEVALITFAQYLQKCPFDELAKLVKDVVDLAHKCVDNEDAAECTKSLPAIFLDEICGVPALRDMYGSMADCCAKDDPERNECFLTFKINNPPFIQPYQRPEPAVLCKDFTDNKQSFLEHYLYRVARKAPFLYAPAILALGADYEHAVEACCAETDIGTCLDEKMSAIKEKAKKLNSRQVYACGILKKFGERVFQAERLAFISQKYPKAPFAEVHKIVQDLKGIYKECCDGDMVECMDDRAELMTYICSKEEAISSKIHHCCEKPVVERSQCIIEADFDDKPADLPPIGDKYIHNPDVCKCLEAGHDAFLAEFLYEYSRRHPEFSTQTCLRIAKLYEDTLEKCCKTENPSECYA…	2521	5174	1	1	1	678.337	1354.66	2	1354.67	-0.0065	0	46.75	0.0021	K	QSFLEHYLYR	V
8	2::tr|A0A151N5S7|A0A151N5S7_ALLMI	Serum albumin OS=Alligator mississippiensis OX=8496 GN=ALB PE=4 SV=1	1711	72062	49	49	32	32	53.3	615	MKWVALISLIFLFSSATSRNLKRSAREAEHKSEIAHRFSDLKETTFKEVALITFAQYLQKCPFDELAKLVKDVVDLAHKCVDNEDAAECTKSLPAIFLDEICGVPALRDMYGSMADCCAKDDPERNECFLTFKINNPPFIQPYQRPEPAVLCKDFTDNKQSFLEHYLYRVARKAPFLYAPAILALGADYEHAVEACCAETDIGTCLDEKMSAIKEKAKKLNSRQVYACGILKKFGERVFQAERLAFISQKYPKAPFAEVHKIVQDLKGIYKECCDGDMVECMDDRAELMTYICSKEEAISSKIHHCCEKPVVERSQCIIEADFDDKPADLPPIGDKYIHNPDVCKCLEAGHDAFLAEFLYEYSRRHPEFSTQTCLRIAKLYEDTLEKCCKTENPSECYA…	2833	3303	1	1	1	704.754	1407.49	2	1407.49	0.0004	0	56.57	2.4e-06	R	DMYGSMADCCAK	D
8	2::tr|A0A151N5S7|A0A151N5S7_ALLMI	Serum albumin OS=Alligator mississippiensis OX=8496 GN=ALB PE=4 SV=1	1711	72062	49	49	32	32	53.3	615	MKWVALISLIFLFSSATSRNLKRSAREAEHKSEIAHRFSDLKETTFKEVALITFAQYLQKCPFDELAKLVKDVVDLAHKCVDNEDAAECTKSLPAIFLDEICGVPALRDMYGSMADCCAKDDPERNECFLTFKINNPPFIQPYQRPEPAVLCKDFTDNKQSFLEHYLYRVARKAPFLYAPAILALGADYEHAVEACCAETDIGTCLDEKMSAIKEKAKKLNSRQVYACGILKKFGERVFQAERLAFISQKYPKAPFAEVHKIVQDLKGIYKECCDGDMVECMDDRAELMTYICSKEEAISSKIHHCCEKPVVERSQCIIEADFDDKPADLPPIGDKYIHNPDVCKCLEAGHDAFLAEFLYEYSRRHPEFSTQTCLRIAKLYEDTLEKCCKTENPSECYA…	2843	1198	1	1	1	706.276	1410.54	2	1410.54	-0.0016	0	65.46	2.5e-06	K	CVDNEDAAECTK	S
8	2::tr|A0A151N5S7|A0A151N5S7_ALLMI	Serum albumin OS=Alligator mississippiensis OX=8496 GN=ALB PE=4 SV=1	1711	72062	49	49	32	32	53.3	615	MKWVALISLIFLFSSATSRNLKRSAREAEHKSEIAHRFSDLKETTFKEVALITFAQYLQKCPFDELAKLVKDVVDLAHKCVDNEDAAECTKSLPAIFLDEICGVPALRDMYGSMADCCAKDDPERNECFLTFKINNPPFIQPYQRPEPAVLCKDFTDNKQSFLEHYLYRVARKAPFLYAPAILALGADYEHAVEACCAETDIGTCLDEKMSAIKEKAKKLNSRQVYACGILKKFGERVFQAERLAFISQKYPKAPFAEVHKIVQDLKGIYKECCDGDMVECMDDRAELMTYICSKEEAISSKIHHCCEKPVVERSQCIIEADFDDKPADLPPIGDKYIHNPDVCKCLEAGHDAFLAEFLYEYSRRHPEFSTQTCLRIAKLYEDTLEKCCKTENPSECYA…	2906	2488	1	1	1	712.748	1423.48	2	1423.49	-0.0054	0	62.9	5.1e-07	R	DMYGSMADCCAK	D
8	2::tr|A0A151N5S7|A0A151N5S7_ALLMI	Serum albumin OS=Alligator mississippiensis OX=8496 GN=ALB PE=4 SV=1	1711	72062	49	49	32	32	53.3	615	MKWVALISLIFLFSSATSRNLKRSAREAEHKSEIAHRFSDLKETTFKEVALITFAQYLQKCPFDELAKLVKDVVDLAHKCVDNEDAAECTKSLPAIFLDEICGVPALRDMYGSMADCCAKDDPERNECFLTFKINNPPFIQPYQRPEPAVLCKDFTDNKQSFLEHYLYRVARKAPFLYAPAILALGADYEHAVEACCAETDIGTCLDEKMSAIKEKAKKLNSRQVYACGILKKFGERVFQAERLAFISQKYPKAPFAEVHKIVQDLKGIYKECCDGDMVECMDDRAELMTYICSKEEAISSKIHHCCEKPVVERSQCIIEADFDDKPADLPPIGDKYIHNPDVCKCLEAGHDAFLAEFLYEYSRRHPEFSTQTCLRIAKLYEDTLEKCCKTENPSECYA…	3070	2192	1	1	1	486.276	1455.8	3	1455.8	0.0002	1	42.99	0.004	K	RKPTITDEQLQK	I
8	2::tr|A0A151N5S7|A0A151N5S7_ALLMI	Serum albumin OS=Alligator mississippiensis OX=8496 GN=ALB PE=4 SV=1	1711	72062	49	49	32	32	53.3	615	MKWVALISLIFLFSSATSRNLKRSAREAEHKSEIAHRFSDLKETTFKEVALITFAQYLQKCPFDELAKLVKDVVDLAHKCVDNEDAAECTKSLPAIFLDEICGVPALRDMYGSMADCCAKDDPERNECFLTFKINNPPFIQPYQRPEPAVLCKDFTDNKQSFLEHYLYRVARKAPFLYAPAILALGADYEHAVEACCAETDIGTCLDEKMSAIKEKAKKLNSRQVYACGILKKFGERVFQAERLAFISQKYPKAPFAEVHKIVQDLKGIYKECCDGDMVECMDDRAELMTYICSKEEAISSKIHHCCEKPVVERSQCIIEADFDDKPADLPPIGDKYIHNPDVCKCLEAGHDAFLAEFLYEYSRRHPEFSTQTCLRIAKLYEDTLEKCCKTENPSECYA…	3071	2328	1	1	1	486.276	1455.81	3	1455.8	0.001	1	35.33	0.023	K	RKPTITDEQLQK	I
8	2::tr|A0A151N5S7|A0A151N5S7_ALLMI	Serum albumin OS=Alligator mississippiensis OX=8496 GN=ALB PE=4 SV=1	1711	72062	49	49	32	32	53.3	615	MKWVALISLIFLFSSATSRNLKRSAREAEHKSEIAHRFSDLKETTFKEVALITFAQYLQKCPFDELAKLVKDVVDLAHKCVDNEDAAECTKSLPAIFLDEICGVPALRDMYGSMADCCAKDDPERNECFLTFKINNPPFIQPYQRPEPAVLCKDFTDNKQSFLEHYLYRVARKAPFLYAPAILALGADYEHAVEACCAETDIGTCLDEKMSAIKEKAKKLNSRQVYACGILKKFGERVFQAERLAFISQKYPKAPFAEVHKIVQDLKGIYKECCDGDMVECMDDRAELMTYICSKEEAISSKIHHCCEKPVVERSQCIIEADFDDKPADLPPIGDKYIHNPDVCKCLEAGHDAFLAEFLYEYSRRHPEFSTQTCLRIAKLYEDTLEKCCKTENPSECYA…	3287	2344	1	1	1	499.262	1494.77	3	1494.77	-0.0024	0	74.68	3.8e-06	K	VEAAIQEHIQETK	D
8	2::tr|A0A151N5S7|A0A151N5S7_ALLMI	Serum albumin OS=Alligator mississippiensis OX=8496 GN=ALB PE=4 SV=1	1711	72062	49	49	32	32	53.3	615	MKWVALISLIFLFSSATSRNLKRSAREAEHKSEIAHRFSDLKETTFKEVALITFAQYLQKCPFDELAKLVKDVVDLAHKCVDNEDAAECTKSLPAIFLDEICGVPALRDMYGSMADCCAKDDPERNECFLTFKINNPPFIQPYQRPEPAVLCKDFTDNKQSFLEHYLYRVARKAPFLYAPAILALGADYEHAVEACCAETDIGTCLDEKMSAIKEKAKKLNSRQVYACGILKKFGERVFQAERLAFISQKYPKAPFAEVHKIVQDLKGIYKECCDGDMVECMDDRAELMTYICSKEEAISSKIHHCCEKPVVERSQCIIEADFDDKPADLPPIGDKYIHNPDVCKCLEAGHDAFLAEFLYEYSRRHPEFSTQTCLRIAKLYEDTLEKCCKTENPSECYA…	3288	2350	1	1	1	748.39	1494.77	2	1494.77	-0.0016	0	83.3	5.1e-07	K	VEAAIQEHIQETK	D
8	2::tr|A0A151N5S7|A0A151N5S7_ALLMI	Serum albumin OS=Alligator mississippiensis OX=8496 GN=ALB PE=4 SV=1	1711	72062	49	49	32	32	53.3	615	MKWVALISLIFLFSSATSRNLKRSAREAEHKSEIAHRFSDLKETTFKEVALITFAQYLQKCPFDELAKLVKDVVDLAHKCVDNEDAAECTKSLPAIFLDEICGVPALRDMYGSMADCCAKDDPERNECFLTFKINNPPFIQPYQRPEPAVLCKDFTDNKQSFLEHYLYRVARKAPFLYAPAILALGADYEHAVEACCAETDIGTCLDEKMSAIKEKAKKLNSRQVYACGILKKFGERVFQAERLAFISQKYPKAPFAEVHKIVQDLKGIYKECCDGDMVECMDDRAELMTYICSKEEAISSKIHHCCEKPVVERSQCIIEADFDDKPADLPPIGDKYIHNPDVCKCLEAGHDAFLAEFLYEYSRRHPEFSTQTCLRIAKLYEDTLEKCCKTENPSECYA…	3290	2437	1	1	1	499.265	1494.77	3	1494.77	0.0049	0	60.43	9.4e-05	K	VEAAIQEHIQETK	D
8	2::tr|A0A151N5S7|A0A151N5S7_ALLMI	Serum albumin OS=Alligator mississippiensis OX=8496 GN=ALB PE=4 SV=1	1711	72062	49	49	32	32	53.3	615	MKWVALISLIFLFSSATSRNLKRSAREAEHKSEIAHRFSDLKETTFKEVALITFAQYLQKCPFDELAKLVKDVVDLAHKCVDNEDAAECTKSLPAIFLDEICGVPALRDMYGSMADCCAKDDPERNECFLTFKINNPPFIQPYQRPEPAVLCKDFTDNKQSFLEHYLYRVARKAPFLYAPAILALGADYEHAVEACCAETDIGTCLDEKMSAIKEKAKKLNSRQVYACGILKKFGERVFQAERLAFISQKYPKAPFAEVHKIVQDLKGIYKECCDGDMVECMDDRAELMTYICSKEEAISSKIHHCCEKPVVERSQCIIEADFDDKPADLPPIGDKYIHNPDVCKCLEAGHDAFLAEFLYEYSRRHPEFSTQTCLRIAKLYEDTLEKCCKTENPSECYA…	3506	3376	1	1	1	511.252	1530.73	3	1530.74	-0.0028	1	55.65	0.00033	R	RHPEFSTQTCLR	I
8	2::tr|A0A151N5S7|A0A151N5S7_ALLMI	Serum albumin OS=Alligator mississippiensis OX=8496 GN=ALB PE=4 SV=1	1711	72062	49	49	32	32	53.3	615	MKWVALISLIFLFSSATSRNLKRSAREAEHKSEIAHRFSDLKETTFKEVALITFAQYLQKCPFDELAKLVKDVVDLAHKCVDNEDAAECTKSLPAIFLDEICGVPALRDMYGSMADCCAKDDPERNECFLTFKINNPPFIQPYQRPEPAVLCKDFTDNKQSFLEHYLYRVARKAPFLYAPAILALGADYEHAVEACCAETDIGTCLDEKMSAIKEKAKKLNSRQVYACGILKKFGERVFQAERLAFISQKYPKAPFAEVHKIVQDLKGIYKECCDGDMVECMDDRAELMTYICSKEEAISSKIHHCCEKPVVERSQCIIEADFDDKPADLPPIGDKYIHNPDVCKCLEAGHDAFLAEFLYEYSRRHPEFSTQTCLRIAKLYEDTLEKCCKTENPSECYA…	3511	3247	1	1	1	511.588	1531.74	3	1531.72	0.0217	1	25.37	0.41	R	RHPEFSTQTCLR	I
8	2::tr|A0A151N5S7|A0A151N5S7_ALLMI	Serum albumin OS=Alligator mississippiensis OX=8496 GN=ALB PE=4 SV=1	1711	72062	49	49	32	32	53.3	615	MKWVALISLIFLFSSATSRNLKRSAREAEHKSEIAHRFSDLKETTFKEVALITFAQYLQKCPFDELAKLVKDVVDLAHKCVDNEDAAECTKSLPAIFLDEICGVPALRDMYGSMADCCAKDDPERNECFLTFKINNPPFIQPYQRPEPAVLCKDFTDNKQSFLEHYLYRVARKAPFLYAPAILALGADYEHAVEACCAETDIGTCLDEKMSAIKEKAKKLNSRQVYACGILKKFGERVFQAERLAFISQKYPKAPFAEVHKIVQDLKGIYKECCDGDMVECMDDRAELMTYICSKEEAISSKIHHCCEKPVVERSQCIIEADFDDKPADLPPIGDKYIHNPDVCKCLEAGHDAFLAEFLYEYSRRHPEFSTQTCLRIAKLYEDTLEKCCKTENPSECYA…	3593	6174	1	1	1	516.631	1546.87	3	1546.87	0	1	48.38	0.00065	K	QKNDYSLLINLVK	R
8	2::tr|A0A151N5S7|A0A151N5S7_ALLMI	Serum albumin OS=Alligator mississippiensis OX=8496 GN=ALB PE=4 SV=1	1711	72062	49	49	32	32	53.3	615	MKWVALISLIFLFSSATSRNLKRSAREAEHKSEIAHRFSDLKETTFKEVALITFAQYLQKCPFDELAKLVKDVVDLAHKCVDNEDAAECTKSLPAIFLDEICGVPALRDMYGSMADCCAKDDPERNECFLTFKINNPPFIQPYQRPEPAVLCKDFTDNKQSFLEHYLYRVARKAPFLYAPAILALGADYEHAVEACCAETDIGTCLDEKMSAIKEKAKKLNSRQVYACGILKKFGERVFQAERLAFISQKYPKAPFAEVHKIVQDLKGIYKECCDGDMVECMDDRAELMTYICSKEEAISSKIHHCCEKPVVERSQCIIEADFDDKPADLPPIGDKYIHNPDVCKCLEAGHDAFLAEFLYEYSRRHPEFSTQTCLRIAKLYEDTLEKCCKTENPSECYA…	4621	3482	1	1	0	896.291	1790.57	2	1790.57	0.0008	0	94.01	4e-10	K	ECCDGDMVECMDDR	A
8	2::tr|A0A151N5S7|A0A151N5S7_ALLMI	Serum albumin OS=Alligator mississippiensis OX=8496 GN=ALB PE=4 SV=1	1711	72062	49	49	32	32	53.3	615	MKWVALISLIFLFSSATSRNLKRSAREAEHKSEIAHRFSDLKETTFKEVALITFAQYLQKCPFDELAKLVKDVVDLAHKCVDNEDAAECTKSLPAIFLDEICGVPALRDMYGSMADCCAKDDPERNECFLTFKINNPPFIQPYQRPEPAVLCKDFTDNKQSFLEHYLYRVARKAPFLYAPAILALGADYEHAVEACCAETDIGTCLDEKMSAIKEKAKKLNSRQVYACGILKKFGERVFQAERLAFISQKYPKAPFAEVHKIVQDLKGIYKECCDGDMVECMDDRAELMTYICSKEEAISSKIHHCCEKPVVERSQCIIEADFDDKPADLPPIGDKYIHNPDVCKCLEAGHDAFLAEFLYEYSRRHPEFSTQTCLRIAKLYEDTLEKCCKTENPSECYA…	4874	4450	1	1	1	464.99	1855.93	4	1855.93	0.0006	1	46.64	0.0031	K	KMPQVSTETMLELGHR	M
8	2::tr|A0A151N5S7|A0A151N5S7_ALLMI	Serum albumin OS=Alligator mississippiensis OX=8496 GN=ALB PE=4 SV=1	1711	72062	49	49	32	32	53.3	615	MKWVALISLIFLFSSATSRNLKRSAREAEHKSEIAHRFSDLKETTFKEVALITFAQYLQKCPFDELAKLVKDVVDLAHKCVDNEDAAECTKSLPAIFLDEICGVPALRDMYGSMADCCAKDDPERNECFLTFKINNPPFIQPYQRPEPAVLCKDFTDNKQSFLEHYLYRVARKAPFLYAPAILALGADYEHAVEACCAETDIGTCLDEKMSAIKEKAKKLNSRQVYACGILKKFGERVFQAERLAFISQKYPKAPFAEVHKIVQDLKGIYKECCDGDMVECMDDRAELMTYICSKEEAISSKIHHCCEKPVVERSQCIIEADFDDKPADLPPIGDKYIHNPDVCKCLEAGHDAFLAEFLYEYSRRHPEFSTQTCLRIAKLYEDTLEKCCKTENPSECYA…	4875	4413	1	1	1	619.651	1855.93	3	1855.93	0.0015	1	68.54	2e-05	K	KMPQVSTETMLELGHR	M
8	2::tr|A0A151N5S7|A0A151N5S7_ALLMI	Serum albumin OS=Alligator mississippiensis OX=8496 GN=ALB PE=4 SV=1	1711	72062	49	49	32	32	53.3	615	MKWVALISLIFLFSSATSRNLKRSAREAEHKSEIAHRFSDLKETTFKEVALITFAQYLQKCPFDELAKLVKDVVDLAHKCVDNEDAAECTKSLPAIFLDEICGVPALRDMYGSMADCCAKDDPERNECFLTFKINNPPFIQPYQRPEPAVLCKDFTDNKQSFLEHYLYRVARKAPFLYAPAILALGADYEHAVEACCAETDIGTCLDEKMSAIKEKAKKLNSRQVYACGILKKFGERVFQAERLAFISQKYPKAPFAEVHKIVQDLKGIYKECCDGDMVECMDDRAELMTYICSKEEAISSKIHHCCEKPVVERSQCIIEADFDDKPADLPPIGDKYIHNPDVCKCLEAGHDAFLAEFLYEYSRRHPEFSTQTCLRIAKLYEDTLEKCCKTENPSECYA…	5133	7112	1	1	1	969.473	1936.93	2	1936.94	-0.0041	0	63.28	7.5e-05	K	YIPPPFNPNVFNFDEK	L
8	2::tr|A0A151N5S7|A0A151N5S7_ALLMI	Serum albumin OS=Alligator mississippiensis OX=8496 GN=ALB PE=4 SV=1	1711	72062	49	49	32	32	53.3	615	MKWVALISLIFLFSSATSRNLKRSAREAEHKSEIAHRFSDLKETTFKEVALITFAQYLQKCPFDELAKLVKDVVDLAHKCVDNEDAAECTKSLPAIFLDEICGVPALRDMYGSMADCCAKDDPERNECFLTFKINNPPFIQPYQRPEPAVLCKDFTDNKQSFLEHYLYRVARKAPFLYAPAILALGADYEHAVEACCAETDIGTCLDEKMSAIKEKAKKLNSRQVYACGILKKFGERVFQAERLAFISQKYPKAPFAEVHKIVQDLKGIYKECCDGDMVECMDDRAELMTYICSKEEAISSKIHHCCEKPVVERSQCIIEADFDDKPADLPPIGDKYIHNPDVCKCLEAGHDAFLAEFLYEYSRRHPEFSTQTCLRIAKLYEDTLEKCCKTENPSECYA…	5134	7167	1	1	1	646.653	1936.94	3	1936.94	-0.0002	0	39.45	0.019	K	YIPPPFNPNVFNFDEK	L
8	2::tr|A0A151N5S7|A0A151N5S7_ALLMI	Serum albumin OS=Alligator mississippiensis OX=8496 GN=ALB PE=4 SV=1	1711	72062	49	49	32	32	53.3	615	MKWVALISLIFLFSSATSRNLKRSAREAEHKSEIAHRFSDLKETTFKEVALITFAQYLQKCPFDELAKLVKDVVDLAHKCVDNEDAAECTKSLPAIFLDEICGVPALRDMYGSMADCCAKDDPERNECFLTFKINNPPFIQPYQRPEPAVLCKDFTDNKQSFLEHYLYRVARKAPFLYAPAILALGADYEHAVEACCAETDIGTCLDEKMSAIKEKAKKLNSRQVYACGILKKFGERVFQAERLAFISQKYPKAPFAEVHKIVQDLKGIYKECCDGDMVECMDDRAELMTYICSKEEAISSKIHHCCEKPVVERSQCIIEADFDDKPADLPPIGDKYIHNPDVCKCLEAGHDAFLAEFLYEYSRRHPEFSTQTCLRIAKLYEDTLEKCCKTENPSECYA…	5577	4554	1	1	1	1054.95	2107.88	2	2107.88	-0.0037	0	70.9	3.1e-06	K	AEDHDTCFGEEGVCLIEK	S
8	2::tr|A0A151N5S7|A0A151N5S7_ALLMI	Serum albumin OS=Alligator mississippiensis OX=8496 GN=ALB PE=4 SV=1	1711	72062	49	49	32	32	53.3	615	MKWVALISLIFLFSSATSRNLKRSAREAEHKSEIAHRFSDLKETTFKEVALITFAQYLQKCPFDELAKLVKDVVDLAHKCVDNEDAAECTKSLPAIFLDEICGVPALRDMYGSMADCCAKDDPERNECFLTFKINNPPFIQPYQRPEPAVLCKDFTDNKQSFLEHYLYRVARKAPFLYAPAILALGADYEHAVEACCAETDIGTCLDEKMSAIKEKAKKLNSRQVYACGILKKFGERVFQAERLAFISQKYPKAPFAEVHKIVQDLKGIYKECCDGDMVECMDDRAELMTYICSKEEAISSKIHHCCEKPVVERSQCIIEADFDDKPADLPPIGDKYIHNPDVCKCLEAGHDAFLAEFLYEYSRRHPEFSTQTCLRIAKLYEDTLEKCCKTENPSECYA…	5578	4677	1	1	1	703.634	2107.88	3	2107.88	-0.0024	0	44.74	0.0014	K	AEDHDTCFGEEGVCLIEK	S
8	2::tr|A0A151N5S7|A0A151N5S7_ALLMI	Serum albumin OS=Alligator mississippiensis OX=8496 GN=ALB PE=4 SV=1	1711	72062	49	49	32	32	53.3	615	MKWVALISLIFLFSSATSRNLKRSAREAEHKSEIAHRFSDLKETTFKEVALITFAQYLQKCPFDELAKLVKDVVDLAHKCVDNEDAAECTKSLPAIFLDEICGVPALRDMYGSMADCCAKDDPERNECFLTFKINNPPFIQPYQRPEPAVLCKDFTDNKQSFLEHYLYRVARKAPFLYAPAILALGADYEHAVEACCAETDIGTCLDEKMSAIKEKAKKLNSRQVYACGILKKFGERVFQAERLAFISQKYPKAPFAEVHKIVQDLKGIYKECCDGDMVECMDDRAELMTYICSKEEAISSKIHHCCEKPVVERSQCIIEADFDDKPADLPPIGDKYIHNPDVCKCLEAGHDAFLAEFLYEYSRRHPEFSTQTCLRIAKLYEDTLEKCCKTENPSECYA…	5579	4547	1	1	1	703.634	2107.88	3	2107.88	-0.0015	0	66.34	9.6e-06	K	AEDHDTCFGEEGVCLIEK	S
8	2::tr|A0A151N5S7|A0A151N5S7_ALLMI	Serum albumin OS=Alligator mississippiensis OX=8496 GN=ALB PE=4 SV=1	1711	72062	49	49	32	32	53.3	615	MKWVALISLIFLFSSATSRNLKRSAREAEHKSEIAHRFSDLKETTFKEVALITFAQYLQKCPFDELAKLVKDVVDLAHKCVDNEDAAECTKSLPAIFLDEICGVPALRDMYGSMADCCAKDDPERNECFLTFKINNPPFIQPYQRPEPAVLCKDFTDNKQSFLEHYLYRVARKAPFLYAPAILALGADYEHAVEACCAETDIGTCLDEKMSAIKEKAKKLNSRQVYACGILKKFGERVFQAERLAFISQKYPKAPFAEVHKIVQDLKGIYKECCDGDMVECMDDRAELMTYICSKEEAISSKIHHCCEKPVVERSQCIIEADFDDKPADLPPIGDKYIHNPDVCKCLEAGHDAFLAEFLYEYSRRHPEFSTQTCLRIAKLYEDTLEKCCKTENPSECYA…	5971	3579	1	1	1	751.619	2251.83	3	2251.83	0.003	1	21.52	0.02	K	GIYKECCDGDMVECMDDR	A
8	2::tr|A0A151N5S7|A0A151N5S7_ALLMI	Serum albumin OS=Alligator mississippiensis OX=8496 GN=ALB PE=4 SV=1	1711	72062	49	49	32	32	53.3	615	MKWVALISLIFLFSSATSRNLKRSAREAEHKSEIAHRFSDLKETTFKEVALITFAQYLQKCPFDELAKLVKDVVDLAHKCVDNEDAAECTKSLPAIFLDEICGVPALRDMYGSMADCCAKDDPERNECFLTFKINNPPFIQPYQRPEPAVLCKDFTDNKQSFLEHYLYRVARKAPFLYAPAILALGADYEHAVEACCAETDIGTCLDEKMSAIKEKAKKLNSRQVYACGILKKFGERVFQAERLAFISQKYPKAPFAEVHKIVQDLKGIYKECCDGDMVECMDDRAELMTYICSKEEAISSKIHHCCEKPVVERSQCIIEADFDDKPADLPPIGDKYIHNPDVCKCLEAGHDAFLAEFLYEYSRRHPEFSTQTCLRIAKLYEDTLEKCCKTENPSECYA…	6406	4820	1	1	1	794.419	2380.24	3	2380.24	-0.0011	0	36.26	0.027	K	INNPPFIQPYQRPEPAVLCK	D
8	2::tr|A0A151N5S7|A0A151N5S7_ALLMI	Serum albumin OS=Alligator mississippiensis OX=8496 GN=ALB PE=4 SV=1	1711	72062	49	49	32	32	53.3	615	MKWVALISLIFLFSSATSRNLKRSAREAEHKSEIAHRFSDLKETTFKEVALITFAQYLQKCPFDELAKLVKDVVDLAHKCVDNEDAAECTKSLPAIFLDEICGVPALRDMYGSMADCCAKDDPERNECFLTFKINNPPFIQPYQRPEPAVLCKDFTDNKQSFLEHYLYRVARKAPFLYAPAILALGADYEHAVEACCAETDIGTCLDEKMSAIKEKAKKLNSRQVYACGILKKFGERVFQAERLAFISQKYPKAPFAEVHKIVQDLKGIYKECCDGDMVECMDDRAELMTYICSKEEAISSKIHHCCEKPVVERSQCIIEADFDDKPADLPPIGDKYIHNPDVCKCLEAGHDAFLAEFLYEYSRRHPEFSTQTCLRIAKLYEDTLEKCCKTENPSECYA…	6496	2041	1	1	1	602.753	2406.98	4	2406.98	0.0038	0	38.51	0.0032	K	QETTHINDQVAHCCDDSYSK	R
8	2::tr|A0A151N5S7|A0A151N5S7_ALLMI	Serum albumin OS=Alligator mississippiensis OX=8496 GN=ALB PE=4 SV=1	1711	72062	49	49	32	32	53.3	615	MKWVALISLIFLFSSATSRNLKRSAREAEHKSEIAHRFSDLKETTFKEVALITFAQYLQKCPFDELAKLVKDVVDLAHKCVDNEDAAECTKSLPAIFLDEICGVPALRDMYGSMADCCAKDDPERNECFLTFKINNPPFIQPYQRPEPAVLCKDFTDNKQSFLEHYLYRVARKAPFLYAPAILALGADYEHAVEACCAETDIGTCLDEKMSAIKEKAKKLNSRQVYACGILKKFGERVFQAERLAFISQKYPKAPFAEVHKIVQDLKGIYKECCDGDMVECMDDRAELMTYICSKEEAISSKIHHCCEKPVVERSQCIIEADFDDKPADLPPIGDKYIHNPDVCKCLEAGHDAFLAEFLYEYSRRHPEFSTQTCLRIAKLYEDTLEKCCKTENPSECYA…	6573	5326	1	1	1	815.391	2443.15	3	2443.16	-0.0051	0	33.74	0.065	R	SQCIIEADFDDKPADLPPIGDK	Y
8	2::tr|A0A151N5S7|A0A151N5S7_ALLMI	Serum albumin OS=Alligator mississippiensis OX=8496 GN=ALB PE=4 SV=1	1711	72062	49	49	32	32	53.3	615	MKWVALISLIFLFSSATSRNLKRSAREAEHKSEIAHRFSDLKETTFKEVALITFAQYLQKCPFDELAKLVKDVVDLAHKCVDNEDAAECTKSLPAIFLDEICGVPALRDMYGSMADCCAKDDPERNECFLTFKINNPPFIQPYQRPEPAVLCKDFTDNKQSFLEHYLYRVARKAPFLYAPAILALGADYEHAVEACCAETDIGTCLDEKMSAIKEKAKKLNSRQVYACGILKKFGERVFQAERLAFISQKYPKAPFAEVHKIVQDLKGIYKECCDGDMVECMDDRAELMTYICSKEEAISSKIHHCCEKPVVERSQCIIEADFDDKPADLPPIGDKYIHNPDVCKCLEAGHDAFLAEFLYEYSRRHPEFSTQTCLRIAKLYEDTLEKCCKTENPSECYA…	6574	5448	1	1	1	815.393	2443.16	3	2443.16	-0.0005	0	58.95	0.0002	R	SQCIIEADFDDKPADLPPIGDK	Y
8	2::tr|A0A151N5S7|A0A151N5S7_ALLMI	Serum albumin OS=Alligator mississippiensis OX=8496 GN=ALB PE=4 SV=1	1711	72062	49	49	32	32	53.3	615	MKWVALISLIFLFSSATSRNLKRSAREAEHKSEIAHRFSDLKETTFKEVALITFAQYLQKCPFDELAKLVKDVVDLAHKCVDNEDAAECTKSLPAIFLDEICGVPALRDMYGSMADCCAKDDPERNECFLTFKINNPPFIQPYQRPEPAVLCKDFTDNKQSFLEHYLYRVARKAPFLYAPAILALGADYEHAVEACCAETDIGTCLDEKMSAIKEKAKKLNSRQVYACGILKKFGERVFQAERLAFISQKYPKAPFAEVHKIVQDLKGIYKECCDGDMVECMDDRAELMTYICSKEEAISSKIHHCCEKPVVERSQCIIEADFDDKPADLPPIGDKYIHNPDVCKCLEAGHDAFLAEFLYEYSRRHPEFSTQTCLRIAKLYEDTLEKCCKTENPSECYA…	6784	2460	1	1	1	635.025	2536.07	4	2536.06	0.013	1	32.31	0.027	K	KQETTHINDQVAHCCDDSYSK	R
8	2::tr|A0A151N5S7|A0A151N5S7_ALLMI	Serum albumin OS=Alligator mississippiensis OX=8496 GN=ALB PE=4 SV=1	1711	72062	49	49	32	32	53.3	615	MKWVALISLIFLFSSATSRNLKRSAREAEHKSEIAHRFSDLKETTFKEVALITFAQYLQKCPFDELAKLVKDVVDLAHKCVDNEDAAECTKSLPAIFLDEICGVPALRDMYGSMADCCAKDDPERNECFLTFKINNPPFIQPYQRPEPAVLCKDFTDNKQSFLEHYLYRVARKAPFLYAPAILALGADYEHAVEACCAETDIGTCLDEKMSAIKEKAKKLNSRQVYACGILKKFGERVFQAERLAFISQKYPKAPFAEVHKIVQDLKGIYKECCDGDMVECMDDRAELMTYICSKEEAISSKIHHCCEKPVVERSQCIIEADFDDKPADLPPIGDKYIHNPDVCKCLEAGHDAFLAEFLYEYSRRHPEFSTQTCLRIAKLYEDTLEKCCKTENPSECYA…	7615	5998	1	1	1	996.715	2987.12	3	2987.12	-0.0024	1	75.26	1e-07	K	ECCDGDMVECMDDRAELMTYICSK	E
9	2::tr|A0A151PBF3|A0A151PBF3_ALLMI	Fibrinogen alpha chain OS=Alligator mississippiensis OX=8496 GN=FGA PE=4 SV=1	1652	68752	52	52	28	28	42	607	MRILCVLLYLSIVWAVEEGSTFEDEGGVARGPRLSERAQASCKHEKSWPFCSDDQWGQKCPSGCRMQGLVDDTNSDFNHRLDKIRKLLDDNENKYKKSKIITTETFNSMKGTLVSGQESDSKYGQVIEDLRRRIVSLKTKVIAQIERIYGLQNSIREQVLEMKRMEVDIDIKIRACKGSCAKSFDYHVDKESYDNIQRQLTQASSINLQSDLSSSIIRVLKIKPMKDSTVLPHFKAGDPKDWPEWNFLNKMQQLELVLESPETGPKFFPVDTSYSSSVHKGDGEPQGSKFVHPTYGKETHFGEGVSSSSTHYTCTKTVTKKVVAGPDGPREEVVEKYTSSDGSDCSHLRGLGKEDISGGYNVRVTAGGGGDDCEDIRQKHTSGAKSGIFRIKPTGSNKV…	256	2469	1	1	1	414.75	827.486	2	827.486	-0.0003	0	38.48	0.0057	K	VIAQIER	I
9	2::tr|A0A151PBF3|A0A151PBF3_ALLMI	Fibrinogen alpha chain OS=Alligator mississippiensis OX=8496 GN=FGA PE=4 SV=1	1652	68752	52	52	28	28	42	607	MRILCVLLYLSIVWAVEEGSTFEDEGGVARGPRLSERAQASCKHEKSWPFCSDDQWGQKCPSGCRMQGLVDDTNSDFNHRLDKIRKLLDDNENKYKKSKIITTETFNSMKGTLVSGQESDSKYGQVIEDLRRRIVSLKTKVIAQIERIYGLQNSIREQVLEMKRMEVDIDIKIRACKGSCAKSFDYHVDKESYDNIQRQLTQASSINLQSDLSSSIIRVLKIKPMKDSTVLPHFKAGDPKDWPEWNFLNKMQQLELVLESPETGPKFFPVDTSYSSSVHKGDGEPQGSKFVHPTYGKETHFGEGVSSSSTHYTCTKTVTKKVVAGPDGPREEVVEKYTSSDGSDCSHLRGLGKEDISGGYNVRVTAGGGGDDCEDIRQKHTSGAKSGIFRIKPTGSNKV…	257	2377	1	1	1	414.751	827.486	2	827.486	0.0001	0	53.02	0.0002	K	VIAQIER	I
9	2::tr|A0A151PBF3|A0A151PBF3_ALLMI	Fibrinogen alpha chain OS=Alligator mississippiensis OX=8496 GN=FGA PE=4 SV=1	1652	68752	52	52	28	28	42	607	MRILCVLLYLSIVWAVEEGSTFEDEGGVARGPRLSERAQASCKHEKSWPFCSDDQWGQKCPSGCRMQGLVDDTNSDFNHRLDKIRKLLDDNENKYKKSKIITTETFNSMKGTLVSGQESDSKYGQVIEDLRRRIVSLKTKVIAQIERIYGLQNSIREQVLEMKRMEVDIDIKIRACKGSCAKSFDYHVDKESYDNIQRQLTQASSINLQSDLSSSIIRVLKIKPMKDSTVLPHFKAGDPKDWPEWNFLNKMQQLELVLESPETGPKFFPVDTSYSSSVHKGDGEPQGSKFVHPTYGKETHFGEGVSSSSTHYTCTKTVTKKVVAGPDGPREEVVEKYTSSDGSDCSHLRGLGKEDISGGYNVRVTAGGGGDDCEDIRQKHTSGAKSGIFRIKPTGSNKV…	394	1617	1	1	1	434.237	866.46	2	866.461	-0.0007	0	42.44	0.0022	K	VVAGPDGPR	E
9	2::tr|A0A151PBF3|A0A151PBF3_ALLMI	Fibrinogen alpha chain OS=Alligator mississippiensis OX=8496 GN=FGA PE=4 SV=1	1652	68752	52	52	28	28	42	607	MRILCVLLYLSIVWAVEEGSTFEDEGGVARGPRLSERAQASCKHEKSWPFCSDDQWGQKCPSGCRMQGLVDDTNSDFNHRLDKIRKLLDDNENKYKKSKIITTETFNSMKGTLVSGQESDSKYGQVIEDLRRRIVSLKTKVIAQIERIYGLQNSIREQVLEMKRMEVDIDIKIRACKGSCAKSFDYHVDKESYDNIQRQLTQASSINLQSDLSSSIIRVLKIKPMKDSTVLPHFKAGDPKDWPEWNFLNKMQQLELVLESPETGPKFFPVDTSYSSSVHKGDGEPQGSKFVHPTYGKETHFGEGVSSSSTHYTCTKTVTKKVVAGPDGPREEVVEKYTSSDGSDCSHLRGLGKEDISGGYNVRVTAGGGGDDCEDIRQKHTSGAKSGIFRIKPTGSNKV…	395	1478	1	1	1	434.238	866.461	2	866.461	-0.0004	0	55.77	9.6e-05	K	VVAGPDGPR	E
9	2::tr|A0A151PBF3|A0A151PBF3_ALLMI	Fibrinogen alpha chain OS=Alligator mississippiensis OX=8496 GN=FGA PE=4 SV=1	1652	68752	52	52	28	28	42	607	MRILCVLLYLSIVWAVEEGSTFEDEGGVARGPRLSERAQASCKHEKSWPFCSDDQWGQKCPSGCRMQGLVDDTNSDFNHRLDKIRKLLDDNENKYKKSKIITTETFNSMKGTLVSGQESDSKYGQVIEDLRRRIVSLKTKVIAQIERIYGLQNSIREQVLEMKRMEVDIDIKIRACKGSCAKSFDYHVDKESYDNIQRQLTQASSINLQSDLSSSIIRVLKIKPMKDSTVLPHFKAGDPKDWPEWNFLNKMQQLELVLESPETGPKFFPVDTSYSSSVHKGDGEPQGSKFVHPTYGKETHFGEGVSSSSTHYTCTKTVTKKVVAGPDGPREEVVEKYTSSDGSDCSHLRGLGKEDISGGYNVRVTAGGGGDDCEDIRQKHTSGAKSGIFRIKPTGSNKV…	669	1828	1	1	1	474.75	947.486	2	947.486	-0.0004	0	36.54	0.027	K	FVHPTYGK	E
[truncated: 1,302 more rows]
